# Supplementary material
Source: PubMed Central journal article supplement (PMC3568320)
Supplement: 1218524110_sapp.pdf [file 1218524110_sapp.pdf]

## B. Structure elucidation of mutaxanthenes

ELECTRONIC SUPPLEMENTARY INFORMATION

# Antimicrobial drug resistance affects broad changes in metabolomic phenotype in addition to secondary metabolism

Dagmara K. Derewacz, Cody R. Goodwin, John A. McLean\* and Brian O. Bachmann\*

Department of Chemistry, Vanderbilt University, 7300 Stevenson Center, Nashville, TN 37204

## Table of Contents

### A. Metabolomic analysis of microbial extracts

---

1. Mutational analysis of antibiotic resistant mutants
2. UPLC-IM-MS method
3. Multivariate statistical analyses of microbial extracts from *Micrococcus luteus*, *Escherichia coli*, and *Bacillus subtilis*
4. OPLS-DA scores plot depicting R4 mutant vs. wild type in a binary fashion
5. Representative S-plot of R4 mutant (-1) vs. wild type (+1)
6. Feature specificity diagram comparing *Bacillus subtilis*, *Escherichia coli*, *Micrococcus luteus*
7. Feature specificity matrix comparing *Bacillus subtilis*, *Escherichia coli*, *Micrococcus luteus* in a binary fashion

### B. Structural Elucidation of Mutaxanthenes

---

1. NMR spectroscopic data for Mutaxanthene A (1) in CD<sub>3</sub>OD
2. NMR spectroscopic data for Mutaxanthene B (2) in D<sub>2</sub>O
3. NMR spectroscopic data for Mutaxanthene C (3) in CD<sub>3</sub>OD
4. NMR spectroscopic data for Mutaxanthene D (4) in D<sub>2</sub>O
5. NMR spectroscopic data for Mutaxanthene E (5) in D<sub>2</sub>O

### C. Genetic Analysis of putative mutaxanthene gene cluster

---

1. Putative mutaxanthene gene cluster

### D. Mass Spectral Data for Select Features

---

1. Retention time and drift time selected mass spectra (low and high energy) and select data for fragmentation and chemical formula interpretation
2. Extracted ion chromatograms for selected features in Table 1
3. Normalized feature heat maps for figures S4 and select heat maps for figure 2a-c.

## B. Structure elucidation of mutaxanthenes

### A. Metabolomic analysis of microbial extracts

**1. Mutational analysis of antibiotic resistant mutants.** PCR of antibiotic resistance genes was performed using Taq DNA polymerase (Roche) and the primers listed in table S1. PCR products were purified and sequenced using BigDye Terminator chemistry and resolved on the ABI 3730xl or 3730 DNA analyzers. UPLC-IM-MS of mutants

**Table S1.** Primers used in this study.

| Gene        | Primer name | Sequence                   |
|-------------|-------------|----------------------------|
| <i>rpsL</i> | rpslf       | 5'-rtgccwacsatycagcag-3'   |
|             | rpslr       | 5'-yccytcttvgcgccgtar-3'   |
| <i>rpoB</i> | rpobb1f     | 5'-ttggcagtctctcccgcgaa-3' |
|             | rpobb1r     | 5'-gacacgtccatgtagtcg-3'   |
|             | rpobb2f     | 5'-ccgttcggcttcacgcag-3'   |
|             | rpobb2r     | 5'-tgcacgacgtcgtccaccga-3' |

**Table S1B.** Mutations in rifampicin (R1-R5) and streptomycin (S1-S6) cohort

| Organism | gene        | mutation         |
|----------|-------------|------------------|
| R1       | <i>rpoB</i> | G3280A           |
| R2       | <i>rpoB</i> | G3280A           |
| R3       | <i>rpoB</i> | G3280A           |
| R4       | <i>rpoB</i> | G3280A           |
| R5       | <i>rpoB</i> | G3280A           |
| S1       | <i>rpsl</i> | No mutation      |
| S2       | <i>rpsl</i> | No mutation      |
| S3       | <i>rpsl</i> | A43G, C9G, G10C  |
| S4       | <i>rpsl</i> | C9G, G10C, G129C |
| S5       | <i>rpsl</i> | No mutation      |
| S6       | <i>rpsl</i> | C9G, G10C        |

## B. Structure elucidation of mutaxanthenes

**2. Liquid chromatography-ion mobility-mass spectrometry conditions.** LC-IM-MS and LC-IM-MS<sup>E</sup> analyses were performed on a SYNAPT G2 HDMS (Waters, Milford, MA) mass spectrometer equipped with a nanoAcquity UPLC and autosampler (Waters, Milford, MA). Metabolites were separated on a 1 mm X 100 mm HSS C18 (1.8 $\mu$ m particle size) column and 1 mm X 20 mm HSS C18 (5 $\mu$ m particle size) guard column. Column temperature was maintained at 40°C to minimize chromatographic drift, and the auto-injector sample tray held at 4°C to minimize sample degradation. A double-loop injection volume of 10 $\mu$ L was injected in a 5 $\mu$ L loop. Chromatographic separations were performed by using a 20 min gradient at a flow rate of 60  $\mu$ L/min using a gradient mixer of 0.1% formic acid in H<sub>2</sub>O (mobile phase A) and 0.1% formic acid in ACN (mobile phase B). Briefly, the mobile phase was held constant at 100% A for 1 min, then ramped linearly to 100% B over 11 minutes, held for 2 minutes at 100%B, then returned to 100%A over 0.1min for a 5.9 min reequilibration period. All analytes were analyzed using positive mode electrospray ionization. Typical parameters include a capillary voltage of 3.0kV, sampling cone setting of 30.0 and extraction cone setting of 2.0, source temperature of 110°C, desolvation gas (N<sub>2</sub>) flow of 700 L/hr, and a cone gas flow of 10 L/hr. Data were acquired in MS<sup>E</sup> mode, which acquires both a low energy spectrum and a high energy spectrum. Collision induced dissociation (CID) was performed post mobility separation with a ramped energy profile from 15-40 V in the high CID acquisition. Traveling wave velocity was held constant at 550 m/s and a height of 40.0 V. Data was acquired at a sampling rate of 2 Hz over the mass range 50-2000 m/z. Sodium formate (10  $\mu$ g/mL) in 90:10 propan-2-ol:water (v:v) was used to calibrate over this range with < 1 ppm mass accuracy. Leucine enkephalin in 50:50 H<sub>2</sub>O:ACN with 0.1% formic acid (v:v) was used as a lock mass compound (accurate mass 278.1141, 556.2771 Da) at a flow rate of 7.0  $\mu$ L/min and a concentration of 2 ng/mL every 10 seconds, with data corrected during acquisition. Data acquisition was performed from 0 to 20 minutes of the liquid chromatography separation. Duplicate technical analysis was performed in a randomized fashion; with quality control samples analyzed every 5 injections. Quality control samples contained equal volume aliquots of each sample mixed together.

## B. Structure elucidation of mutaxanthenes

### 3. Multivariate statistical analysis of microbial extracts from *Micrococcus luteus*, *Escherichia coli*, and *Bacillus subtilis*.

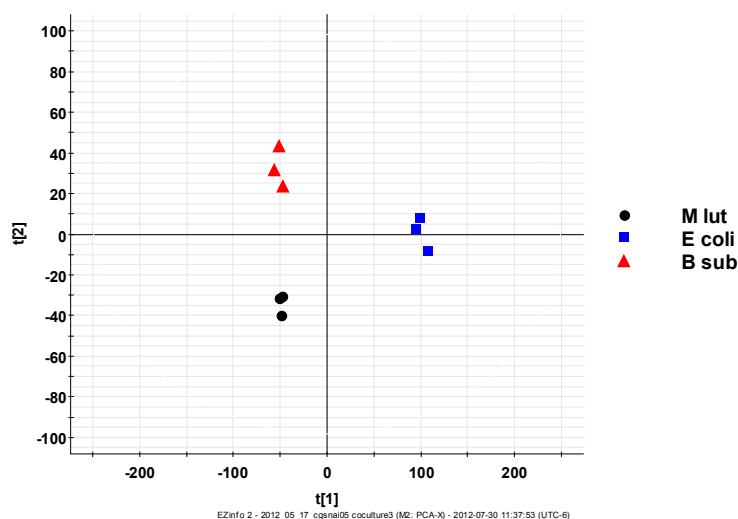

**Figure S1.** Principal component analysis of microbial extracts from *Micrococcus luteus*, *Escherichia coli*, and *Bacillus subtilis*. Symbols represent technical replicates. The clustering of technical replicates indicates instrument stability. The separation of groups indicates that the three organisms have sufficiently different metabolic profiles that the first two principal components are defined by these differences.

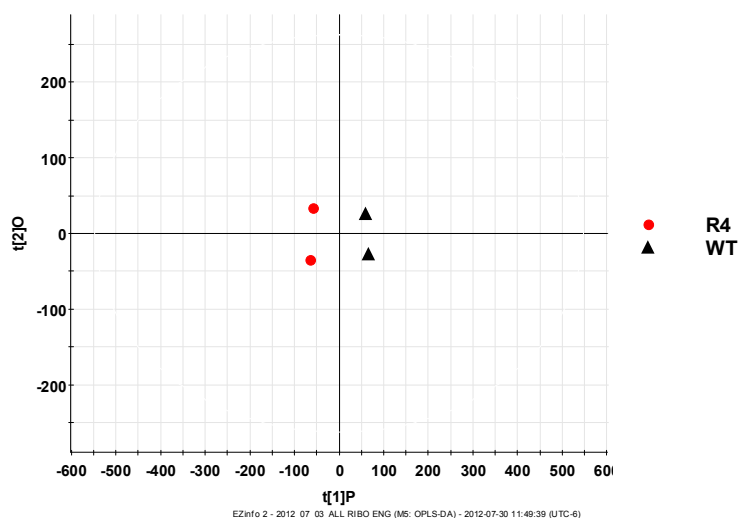

**Figure S2.** Orthogonal projection to latent structures-discriminant analysis (OPLS-DA) scores plot depicting R4 mutant vs. wild type in a binary fashion. OPLS-DA defines the first principal component as the eigenvector that with maximum eigenvalue of the covariance matrix between the two defined groups (R4 and wild type). The orthogonal vector describes the greatest intragroup differences.



## B. Structure elucidation of mutaxanthenes

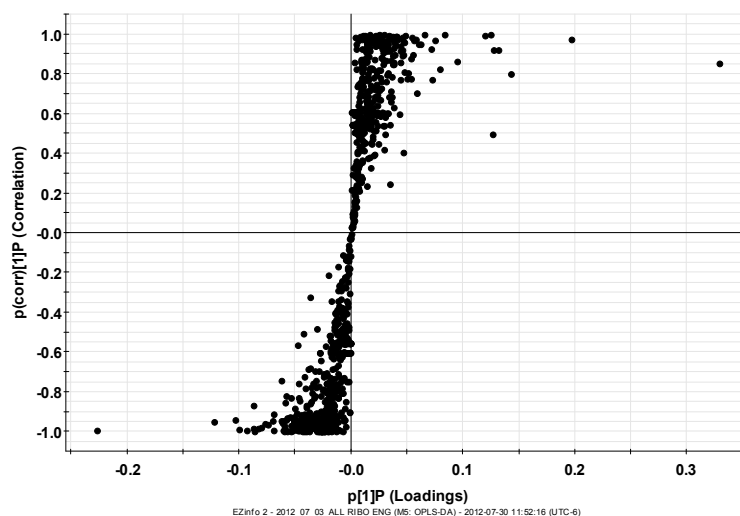

**Figure S3.** Representative S-plot of R4 mutant (-1) vs. wild type (+1). This S-plot corresponds to figure S2, and is a visualization of loadings contribution. The correlation describes how specific to a particular group in the OPLS-DA a feature is (represented by a black dot). A correlation of 1 is perfect group correlation. The loadings correspond to the contribution of that feature to the first principal component of the OPLS-DA. As a result, outliers in quadrant I and III correspond to high abundance and exclusive features in the wild type and R4 mutant extracts, respectively. For all analyses, a correlation cutoff of  $\geq 0.9$  was used.

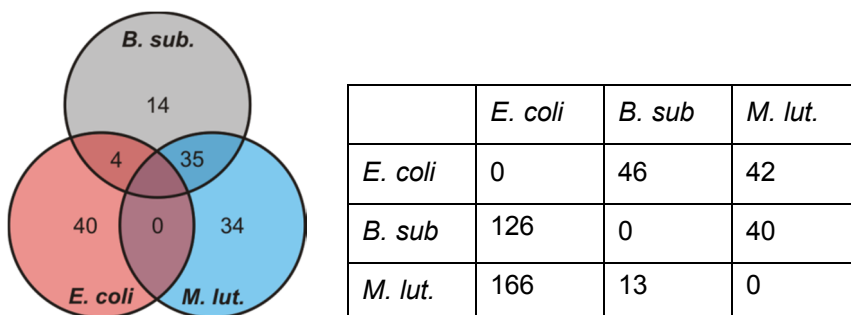

**Figure S4. Left:** Feature specificity diagram comparing *Bacillus subtilis*, *Escherichia coli*, *Micrococcus luteus*. Pareto scaled OPLS-DA was used, and features with a correlation coefficient  $\geq 0.9$  were considered specific to a group. There are 963 total features. Groups were permuted in a binary fashion, with two organisms compared against one at a given time. There are 838 shared features. **Right.** Feature specificity matrix comparing *Bacillus subtilis*, *Escherichia coli*, *Micrococcus luteus* in a binary fashion. Pareto scaled OPLS-DA was used and a correlation coefficient of  $\geq 0.9$  was used as a threshold for feature specific to an organism pair. The bottom half of the matrix corresponds to features specific to the organism indicated in the first column compared to the organism in the first row. The top half of the matrix corresponds to features specific to the organism in the first row when compared to the organism in the first column. There are 963 total features.

## B. Structure elucidation of mutaxanthenes

### B. Structure elucidation of mutaxanthenes

Feature 1 (Fig. 3B, Table S2) was isolated with UV spectrum showing absorption maxima at 225, 252, 279 and 409 nm. The high resolution mass spectrum yielded an apparent  $m/z$  of 443.101,  $[M+H]^+$ . Combining mass with  $^1\text{H}$  and  $^{13}\text{C}$  NMR spectral data (Table S2) determined molecular formula of  $\text{C}_{22}\text{H}_{18}\text{O}_{10}$  with 14 degrees of unsaturation. The  $^{13}\text{C}$  NMR and HMBC spectra indicated the presence of 22 carbons including one methyl group, one methoxy, two methylene, five methine and thirteen quaternary carbons. The ten olefinic carbons and 5 carbonyls accounted for 10 degrees of unsaturation suggesting the presence of four rings. The 2D NMR spectral data allowed to establish partial structures (I - III) (Fig. 3A). The COSY, HSQC and HMBC NMR correlations indicated that the aromatic ring of fragment a is trisubstituted with the hydroxyl group in C7 position. The chemical shifts of carbons C6 and C11 suggested that they are  $\alpha,\beta$ -unsaturated carbonyls in a ring. The HMBC correlations from aromatic proton H10 to carbon C11 and from aromatic proton H8 to carbon C6 allowed to establish the positions of carbons C6 and C11 in the ring and suggested that they are adjacent to the aromatic ring. The structure of fragment a was confirmed by the feeding experiment with the 1,2- $^{13}\text{C}$  sodium acetate where the incorporation pattern allowed to unambiguously establish the carbon backbone of I. The partial structure II (Fig. 3A) was determined based on  $^1\text{H}$  and  $^{13}\text{C}$  NMR chemical shifts, HMBC and 1,1-ADEQUATE correlations and confirmed with data from incorporation of labeled 1,2- $^{13}\text{C}$  sodium acetate experiment. The HMBC correlations from H12 methylene protons to the quaternary carbons C11a and C12a indicated the position of C12 in the fragment II. The 1,1-ADEQUATE experiment and labeled acetate incorporation pattern further confirmed that C12 is adjacent to C11a and C12a. The chemical shift of methine C1 indicated the presence of neighboring oxygen atom. The HMBC correlations from H1 proton to C17 carbon and from H17 protons to C1 carbon confirmed the presence of the methoxy group attached to the methine C1. The HMBC correlations from proton H1 to carbons C2 and C12a indicated that methine C1 is adjacent to C2 and C12a and this was confirmed by 1,1-ADEQUATE spectral data and labeled acetate incorporation pattern. The chemical shift of methine C4a also indicated the presence of neighboring oxygen. The HMBC correlations from proton C4a to carbons C4 and C12a suggested that they are adjacent and the position of carbon C3 was established based on labeled acetate incorporation pattern which indicated that carbons C2 and C3 are attached. Furthermore the HMBC correlation from proton H1 to carbon C3 allowed assembling another ring within fragment II. The crucial HMBC and 1,1-ADEQUATE correlations from protons H12 to carbon C11a and from proton C4a to carbon C5 determined the connectivity between fragments I and II and allowed to assemble the last ring which turned out to be unusual xanthene scaffold. Finally, the position of carboxylic acid moiety in fragment II was established based on HMBC correlations from H12 methylene protons, H4a methine proton and H1 methine proton to C16 carbon. The last partial structure III (Fig.3A) was determined based on COSY correlations between methyl C15 and methylene C14 and HMBC from C14 protons to C13 ketone. Furthermore, the HMBC correlations from C14 methylene protons to C3 quaternary carbon allowed assembling fragment II with

## B. Structure elucidation of mutaxanthenes

fragment **III** and as result we proposed the final structure (Fig 3B). Mutaxanthene B (**2**) was assigned to the molecular formula of  $C_{23}H_{20}O_{10}$  by HR-MS ( $m/z$  457.115,  $[M + H]^+$ ). Comparison of  $^1H$  and  $^{13}C$  NMR spectra of compounds **1** and **2** revealed the presence of the additional methoxy group ( $\delta_H$  3.96,  $\delta_C$  56.9) which showed the HMBC correlations to two olefinic carbons (C7 and C8) in the aromatic ring (Table S3). The molecular formula of mutaxanthene C (**3**) was established as  $C_{21}H_{16}O_{10}$  by HR-MS of  $m/z$  429.085,  $[M + H]^+$ . Comparison of  $^1H$  and  $^{13}C$  NMR spectra revealed the absence of methylene C14 and significant downfield shift of C15 methyl suggesting replacement of ethyl group with methyl group. The HMBC correlations to C13 and C3 confirmed the structure of **3** (Table S4). Mutaxanthene D (**4**) was assigned to the molecular formula of  $C_{22}H_{19}NO_9$ . The  $^1H$  and  $^{13}C$  NMR spectra of **1** and **4** were very similar with the most significant difference in chemical shift from 208.2 for **1** to 182.5 for **2** for carbon C13 indicating the replacement of ketone group with amino group in this position along with equilibrium shift from endocyclicenol as dominant tautomer for compound **1** and ketone as dominant tautomer for compound **4** (Table S5). The structure of mutaxanthene E (**5**) was established based on molecular formula of  $C_{21}H_{17}NO_9$  and comparison of  $^1H$  and  $^{13}C$  NMR spectra of **5** to compounds **3** and **4** indicating the presence of amino group in C13 position and methyl group adjacent to C13 carbon (Table S6).

## B. Structure elucidation of mutaxanthenes

**Table S2.** NMR spectroscopic data for compound **1** in CD<sub>3</sub>OD.

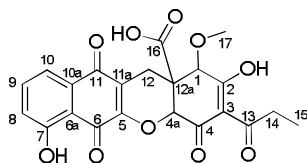

| Pos. | <sup>13</sup> C | <sup>1</sup> H                      | HMBC                 | J <sub>CC</sub> /Hz |
|------|-----------------|-------------------------------------|----------------------|---------------------|
| 1    | 83.3            | 4.12, 1H, br                        | 2,3,4a,12,12a, 16,17 | br                  |
| 2    | 190.2           |                                     |                      | 48.3                |
| 3    | 109.1           |                                     |                      | 60                  |
| 4    | 190.8           |                                     |                      | br                  |
| 4a   | 76.3            | 5.56, 1H, br                        | 1,4,5,12,12a, 16     | br                  |
| 5    | 154.3           |                                     |                      | 61.6                |
| 6    | 183.9           |                                     |                      | 61.6                |
| 6a   | 114.6           |                                     |                      | 64                  |
| 7    | 162.3           |                                     |                      | 64                  |
| 8    | 124.7           | 7.0, 1H, d, 8.3 Hz                  | 6, 6a, 7, 10         | 58.2                |
| 9    | 137.8           | 7.43, 1H, br dd, 8Hz                | 7, 10a               | 58.2                |
| 10   | 119.6           | 7.24, 1H, d, 7.2Hz                  | 6a, 8, 11            | 62.5                |
| 10a  | 132.5           |                                     |                      | 62.5                |
| 11   | 183.3           |                                     |                      | 56.9                |
| 11a  | 120             |                                     |                      | 56.9                |
| 12   | 23.1            | 2.38, 1H br d, 3.08, 1H, br d, 19Hz | 1,4a,5,11,11a,12a,16 | 33.3                |
| 12a  | 48              |                                     |                      | 33.3                |
| 13   | 208.2           |                                     |                      |                     |
| 14   | 34.5            | 2.97, 2H, m                         | 3, 13, 15            | 35.2                |
| 15   | 8.3             | 1.05, 3H, br t, 7.1Hz               | 13, 14               | 35.2                |
| 16   | 172.1           |                                     |                      |                     |
| 17   | 60.9            | 3.5, 3H, br s                       | 1                    |                     |

## B. Structure elucidation of mutaxanthenes

**Table S3.** NMR spectroscopic data for compound **2** in D<sub>2</sub>O.

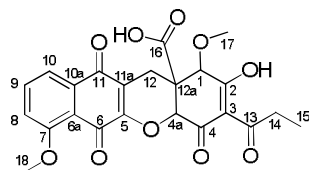

| Pos. | <sup>13</sup> C | <sup>1</sup> H                 | HMBC                       |
|------|-----------------|--------------------------------|----------------------------|
| 1    | 86.0            | 3.77, 1H, br                   | 2, 3, 4a, 12, 12a, 16, 17  |
| 2    | 188.6           |                                |                            |
| 3    | 112.2           |                                |                            |
| 4    | 189.5           |                                |                            |
| 4a   | 76.5            | 5.44, 1H, br                   | 4, 5, 12, 12a, 16          |
| 5    | 154.5           |                                |                            |
| 6    | 179.1           |                                |                            |
| 6a   | 116.9           |                                |                            |
| 7    | 159.6           |                                |                            |
| 8    | 118.5           | 7.23, 1H, d,                   | 6, 6a, 7, 10               |
| 9    | 136.4           | 7.52, 1H, brdd,                | 7, 10a                     |
| 10   | 119.0           | 7.34, 1H, d,                   | 6a, 8, 11                  |
| 10a  | 133.1           |                                |                            |
| 11   | 184.8           |                                |                            |
| 11a  | 117.6           |                                |                            |
| 12   | 22.4            | 2.26, 1H br d, 2.96, 1H, br d, | 1, 4a, 5, 11, 11a, 12a, 16 |
| 12a  | 48.2            |                                |                            |
| 13   | 210.0           |                                |                            |
| 14   | 35.8            | 2.55, 2H, m                    | 13, 15                     |
| 15   | 8.5             | 0.89, 3H, br t,                | 13, 14                     |
| 16   | 176.5           |                                |                            |
| 17   | 59.8            | 3.43, 3H, br s                 | 1                          |
| 18   | 56.2            | 3.83, 3H, s                    | 7, 8                       |

## B. Structure elucidation of mutaxanthenes

**Table S4.** NMR spectroscopic data for compound **3** in CD<sub>3</sub>OD.

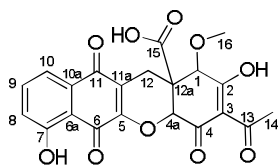

| Pos. | <sup>13</sup> C | <sup>1</sup> H                 | HMBC                          |
|------|-----------------|--------------------------------|-------------------------------|
| 1    | 82.9            | 4.17, 1H, br                   |                               |
| 2    | -               |                                |                               |
| 3    | 109.6           |                                |                               |
| 4    | -               |                                |                               |
| 4a   | 76.9            | 5.55, 1H, br                   |                               |
| 5    | 154.4           |                                |                               |
| 6    | 178.4           |                                |                               |
| 6a   | 114.9           |                                |                               |
| 7    | 162.6           |                                |                               |
| 8    | 124.5           | 7.24, 1H, d,                   | 6a, 7, 10                     |
| 9    | 137.7           | 7.65, 1H, brdd,                | 7, 10a                        |
| 10   | 119.4           | 7.56, 1H, d,                   | 6a, 8, 11                     |
| 10a  | 132.9           |                                |                               |
| 11   | 183.4           |                                |                               |
| 11a  | 119.9           |                                |                               |
| 12   | 23.0            | 2.50, 1H br d, 3.19, 1H, br d, | 1, 4a, 5, 6, 11, 11a, 12a, 16 |
| 12a  | 48.1            |                                |                               |
| 13   | 203.7           |                                |                               |
| 14   | 27.4            | 2.56, 3H, s                    | 3, 13                         |
| 15   | 172.0           |                                |                               |
| 16   | 60.7            | 3.57, 3H, br s                 |                               |

## B. Structure elucidation of mutaxanthenes

**Table S5.** NMR spectroscopic data for compound **4** in D<sub>2</sub>O.

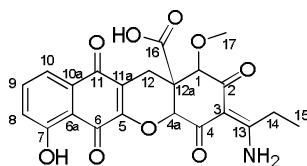

| Pos. | <sup>13</sup> C | <sup>1</sup> H                  | HMBC                       | J <sub>CC</sub> /Hz |
|------|-----------------|---------------------------------|----------------------------|---------------------|
| 1    | 85.7            | 3.82, 1H, s                     | 2, 3, 4a, 12, 12a, 16, 17  | 45.5                |
| 2    | 192.5           |                                 |                            | 45.5                |
| 3    | 102.3           |                                 |                            | 61.2                |
| 4    | 192.2           |                                 |                            | 61.2                |
| 4a   | 77.2            | 5.43, 1H, d                     | 1, 4, 5, 12, 12a, 16       |                     |
| 5    | 153.4           |                                 |                            | 61.0                |
| 6    | 183.1           |                                 |                            | 61.0                |
| 6a   | 113.3           |                                 |                            | 64.5                |
| 7    | 160.0           |                                 |                            | 64.5                |
| 8    | 123.8           | 7.0, 1H, d, 8.3 Hz              | 6, 6a, 7, 10               | 58.4                |
| 9    | 137.1           | 7.43, 1H, dd, 8Hz               | 7, 10a                     | 58.4                |
| 10   | 119.2           | 7.22, 1H, d, 7.2Hz              | 6a, C8, 11                 | 62.8                |
| 10a  | 131.1           |                                 |                            | 62.8                |
| 11   | 183.9           |                                 |                            | 57.6                |
| 11a  | 119.9           |                                 |                            | 57.6                |
| 12   | 22.2            | 2.17, 1H dd, 2.94, 1H, dd, 19Hz | 1, 4a, 5, 11, 11a, 12a, 16 | 34.4                |
| 12a  | 47.3            |                                 |                            | 34.4                |
| 13   | 182.5           |                                 |                            | 56                  |
| 14   | 29.8            | 2.83, 2H, dq                    | 3, 13, 15                  | -                   |
| 15   | 11.3            | 1.09, 3H, t, 7.1Hz              | 13, 14                     | -                   |
| 16   | 175.8           |                                 |                            |                     |
| 17   | 59.9            | 3.42, 3H, s                     | 1                          |                     |

## B. Structure elucidation of mutaxanthenes

**Table S6.** NMR spectroscopic data for compound **5** in D<sub>2</sub>O.

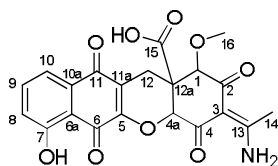

| Pos. | <sup>13</sup> C | <sup>1</sup> H             | HMBC                       |
|------|-----------------|----------------------------|----------------------------|
| 1    | 85.3            | 3.83, 1H, s                | 2, 3, 4a, 12, 12a, 16, 17  |
| 2    | 192.7           |                            |                            |
| 3    | 103.3           |                            |                            |
| 4    | 192.3           |                            |                            |
| 4a   | 77.4            | 5.42, 1H, d                | 1, 4, 5, 12, 12a, 16       |
| 5    | 153.7           |                            |                            |
| 6    | 183.3           |                            |                            |
| 6a   | 113.6           |                            |                            |
| 7    | 160.2           |                            |                            |
| 8    | 123.8           | 7.15, 1H, d,               | 6, 6a, 7, 10               |
| 9    | 137.1           | 7.56, 1H, dd,              | 7, 10a                     |
| 10   | 119.3           | 7.43, 1H, d,               | 6a, 8, 11                  |
| 10a  | 131.4           |                            |                            |
| 11   | 184.6           |                            |                            |
| 11a  | 120.0           |                            |                            |
| 12   | 22.3            | 2.26, 1H dd, 2.95, 1H, dd, | 1, 4a, 5, 11, 11a, 12a, 16 |
| 12a  | 47.6            |                            |                            |
| 13   | 177.8           |                            |                            |
| 14   | 24.2            | 2.41, 3H, s                | 13, 3                      |
| 15   | 175.9           |                            |                            |
| 16   | 60.0            | 3.42, 3H, s                | 1                          |



## B. Structure elucidation of mutaxanthenes

Mutaxanthene A

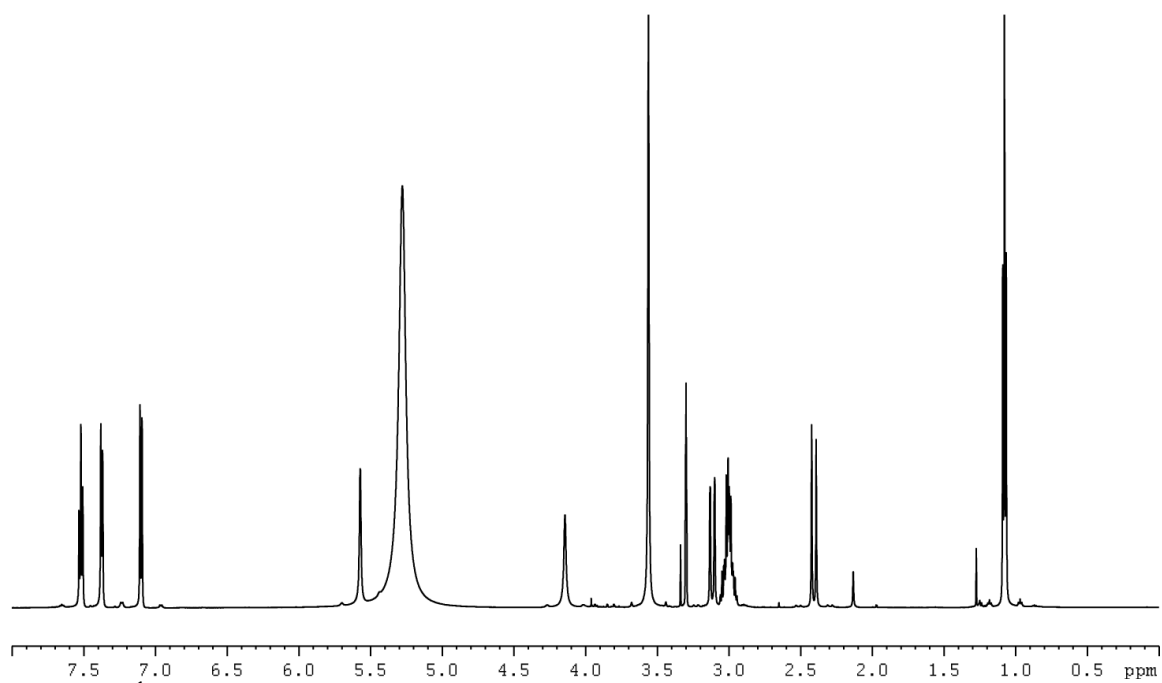

Figure S6.  $^1\text{H}$  proton NMR of mutaxanthene A (1) in  $\text{CD}_3\text{OD}$ .

Mutaxanthene A

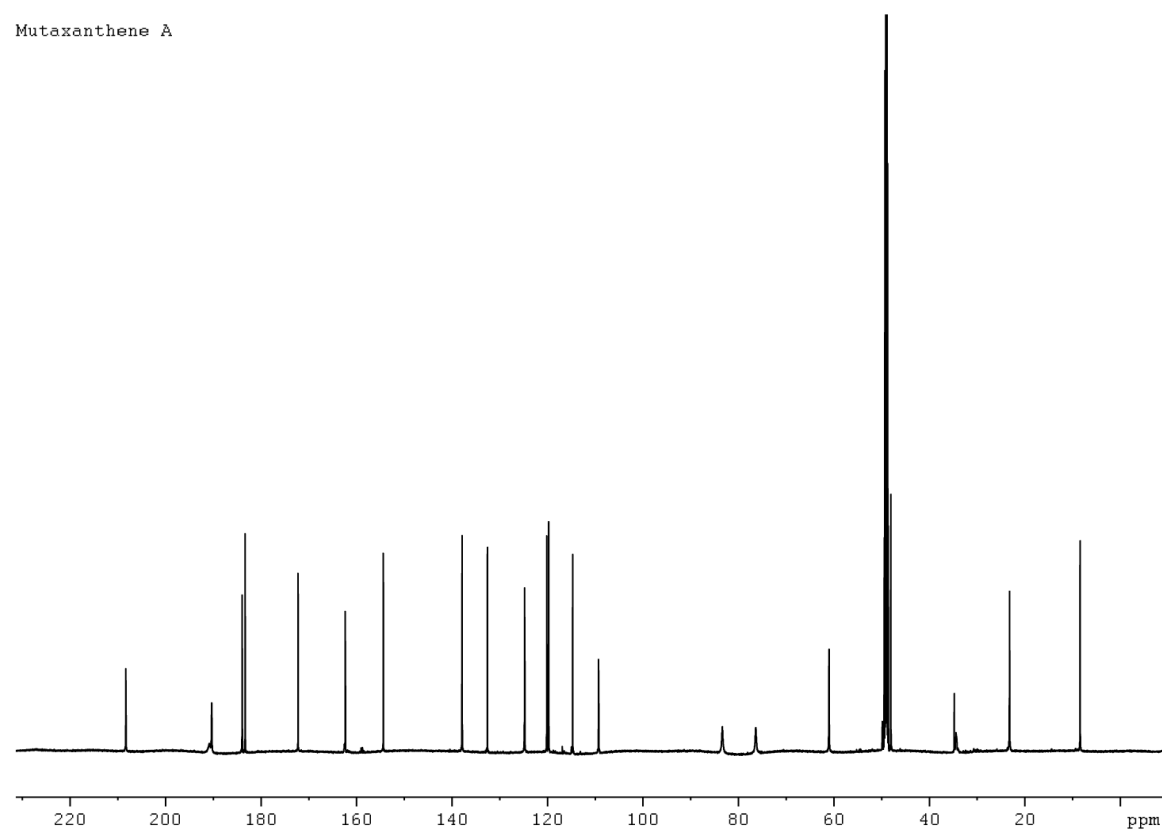

Figure S7.  $^{13}\text{C}$  carbon NMR of mutaxanthene A (1) in  $\text{CD}_3\text{OD}$ .

## B. Structure elucidation of mutaxanthenes

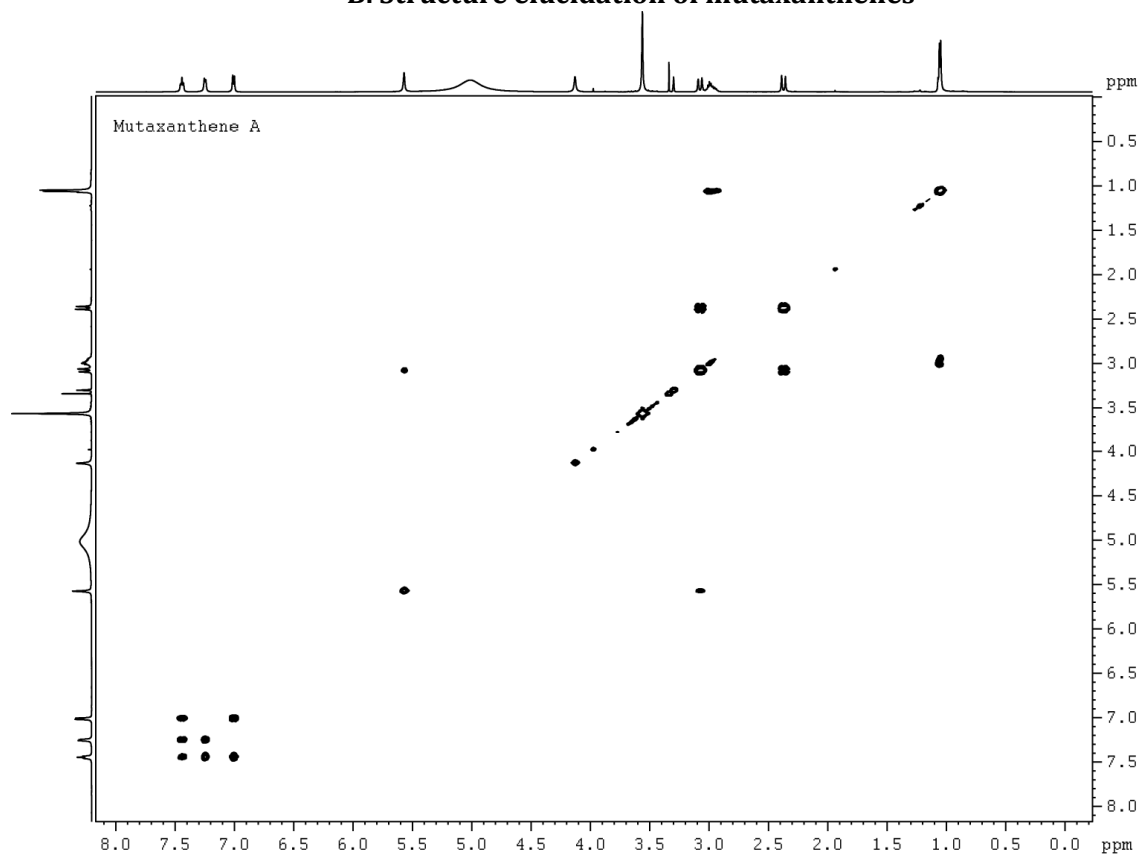

Figure S8. 2D COSY NMR of mutaxanthene A (**1**) in CD<sub>3</sub>OD.

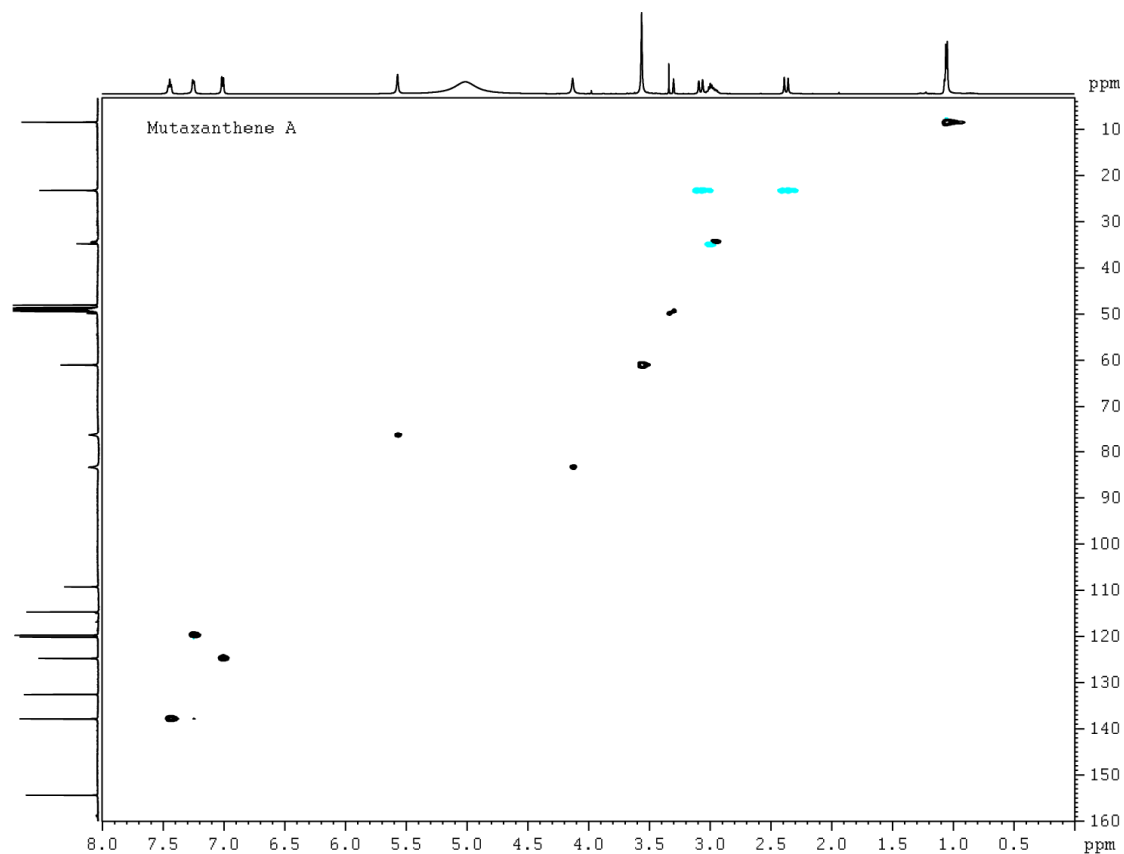

Figure S9. 2D HSQC NMR of mutaxanthene A (**1**) in CD<sub>3</sub>OD.

## B. Structure elucidation of mutaxanthenes

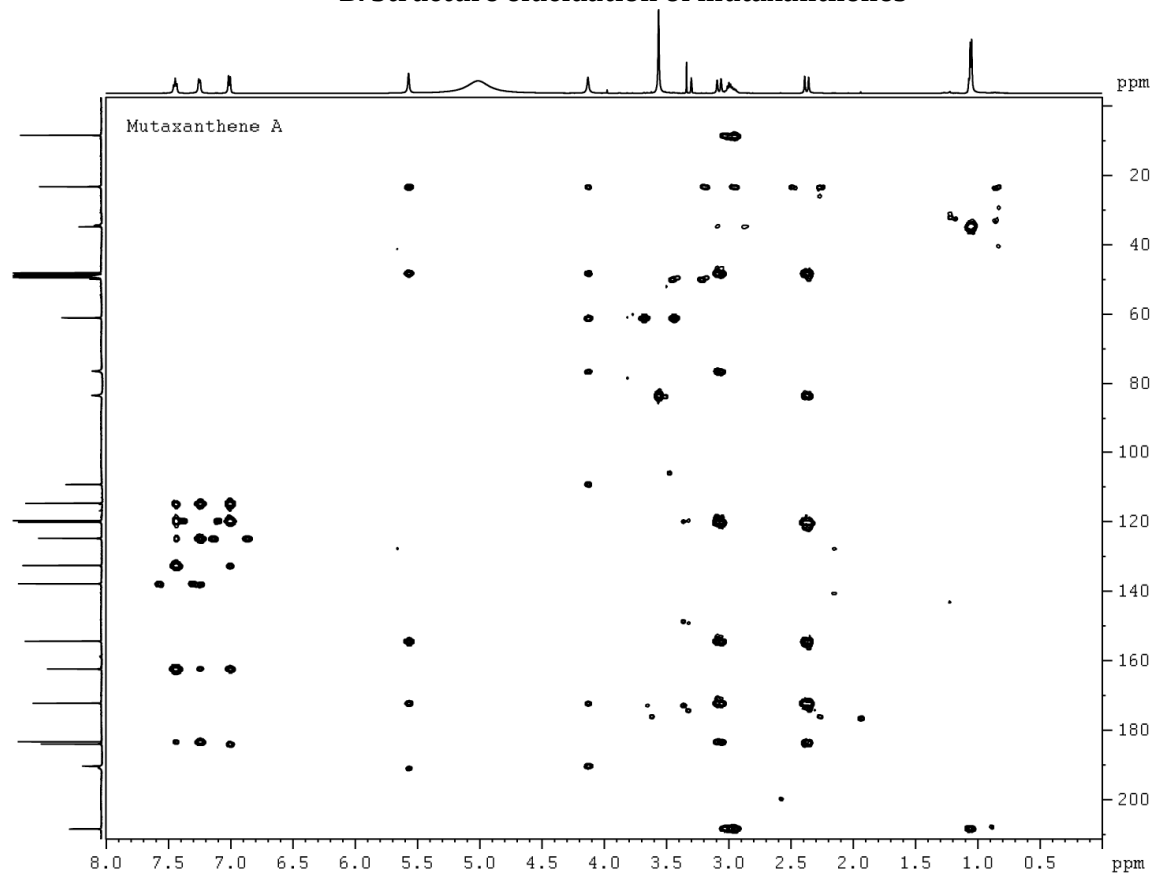

Figure S10. 2D HMBC NMR of mutaxanthene A (**1**) in CD<sub>3</sub>OD.

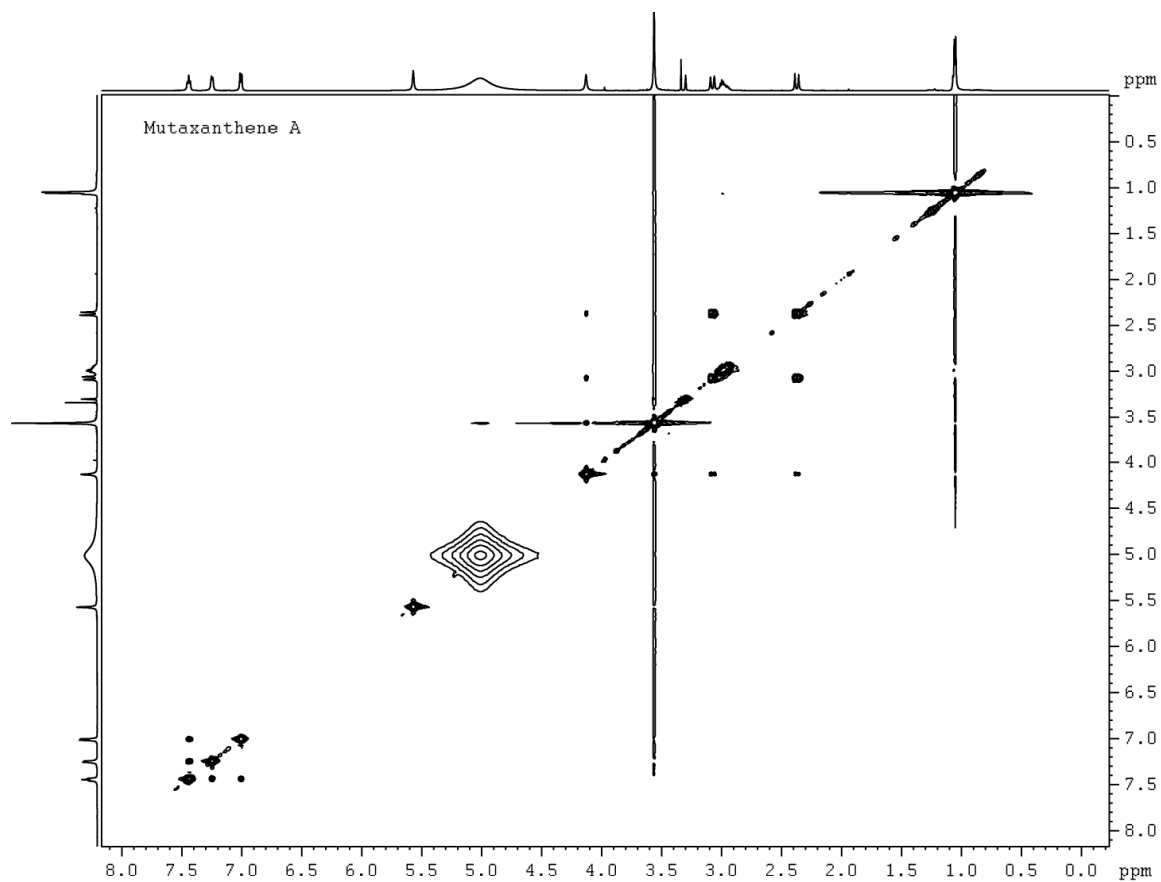

Figure S11. 2D NOESY NMR of mutaxanthene A (**1**) in CD<sub>3</sub>OD.

## B. Structure elucidation of mutaxanthenes

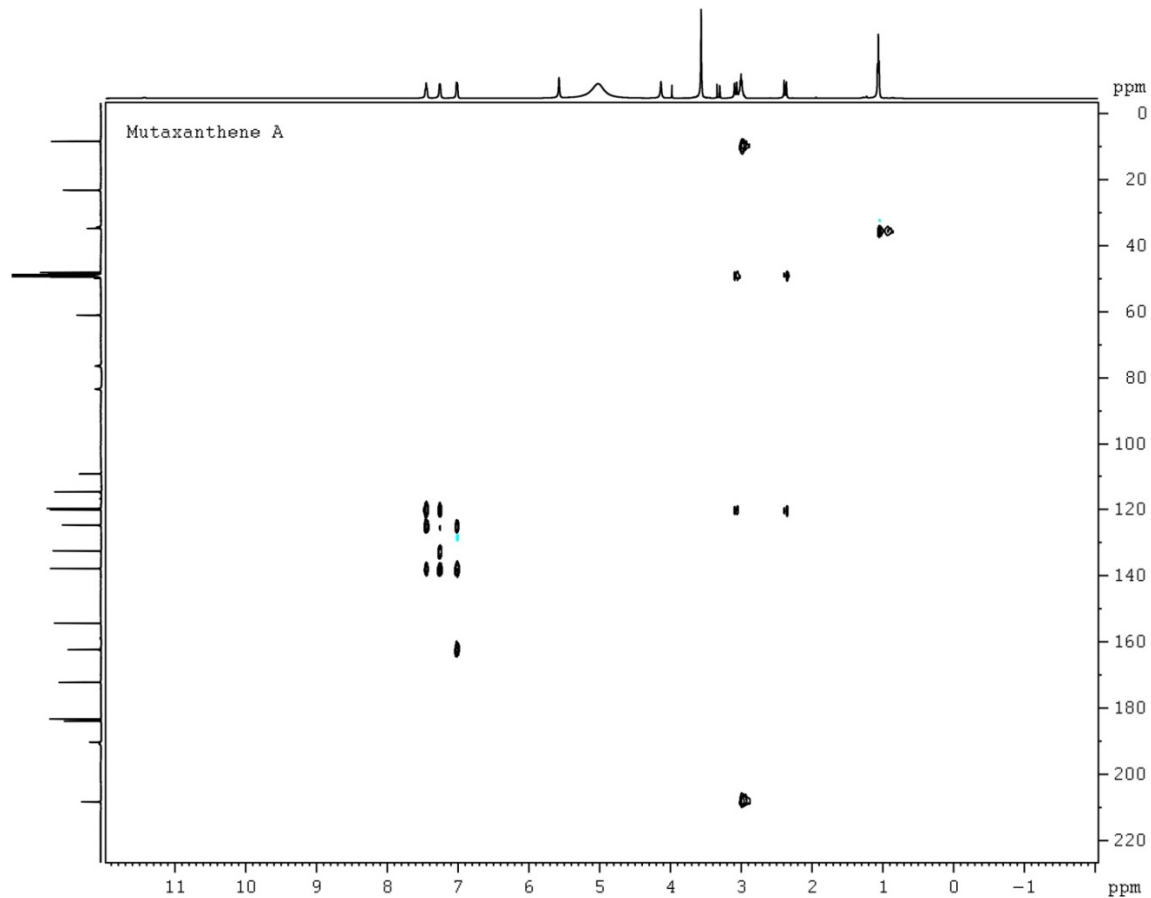

Figure S12. 2D 1,1-ADEQUATE NMR of mutaxanthene A (**1**) in CD<sub>3</sub>OD.

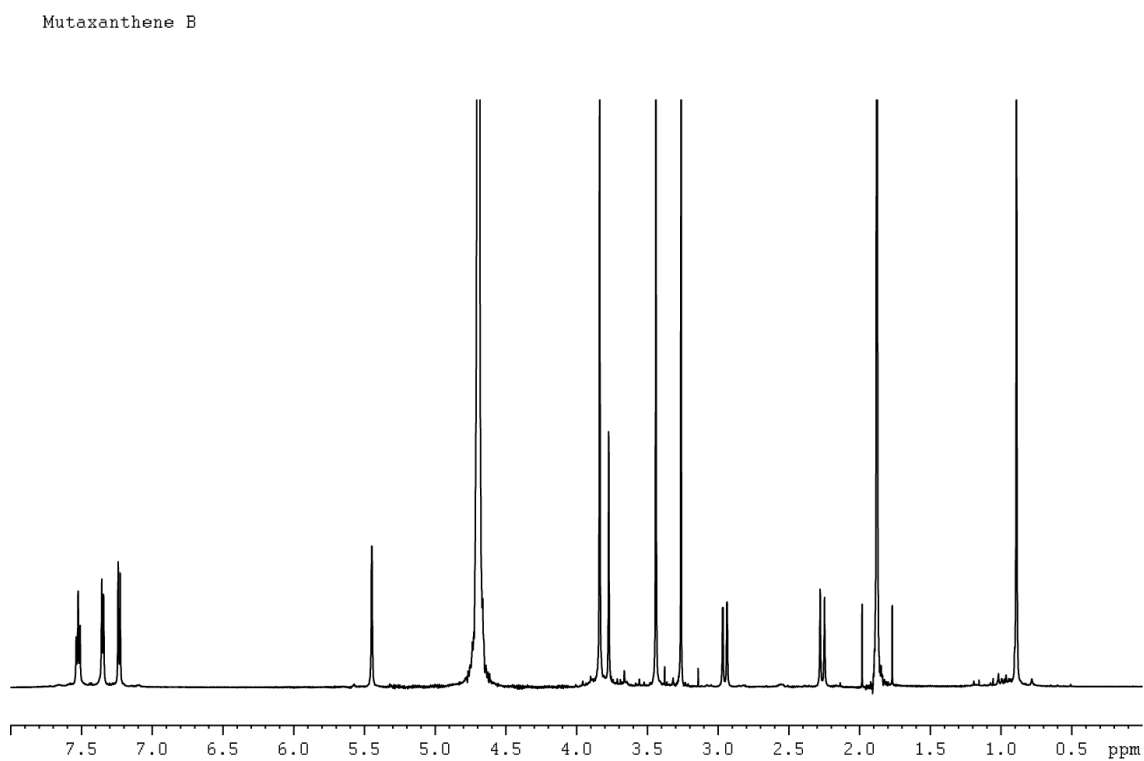

Figure S13. <sup>1</sup>H proton NMR of mutaxanthene B (**2**) in D<sub>2</sub>O.

## B. Structure elucidation of mutaxanthenes

Mutaxanthene B

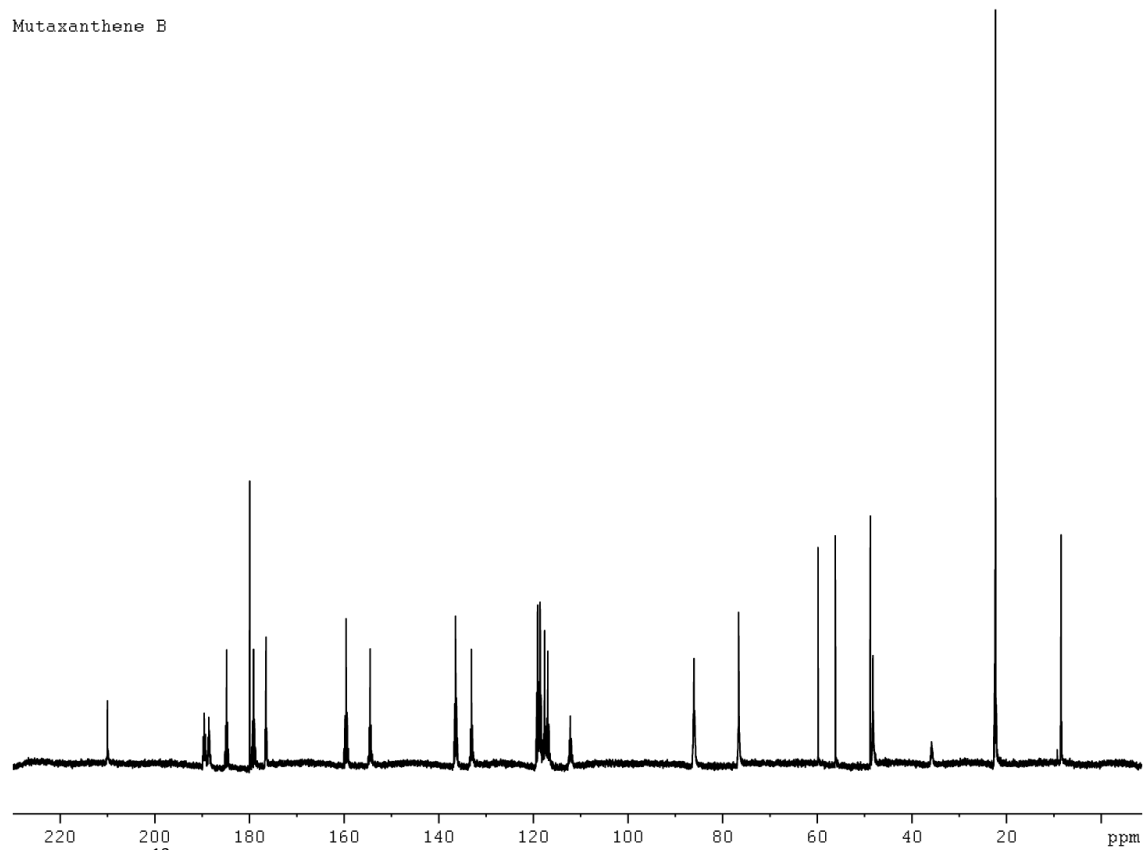

Figure S14.  $^{13}\text{C}$  carbon NMR of mutaxanthene B (2) in  $\text{D}_2\text{O}$ .

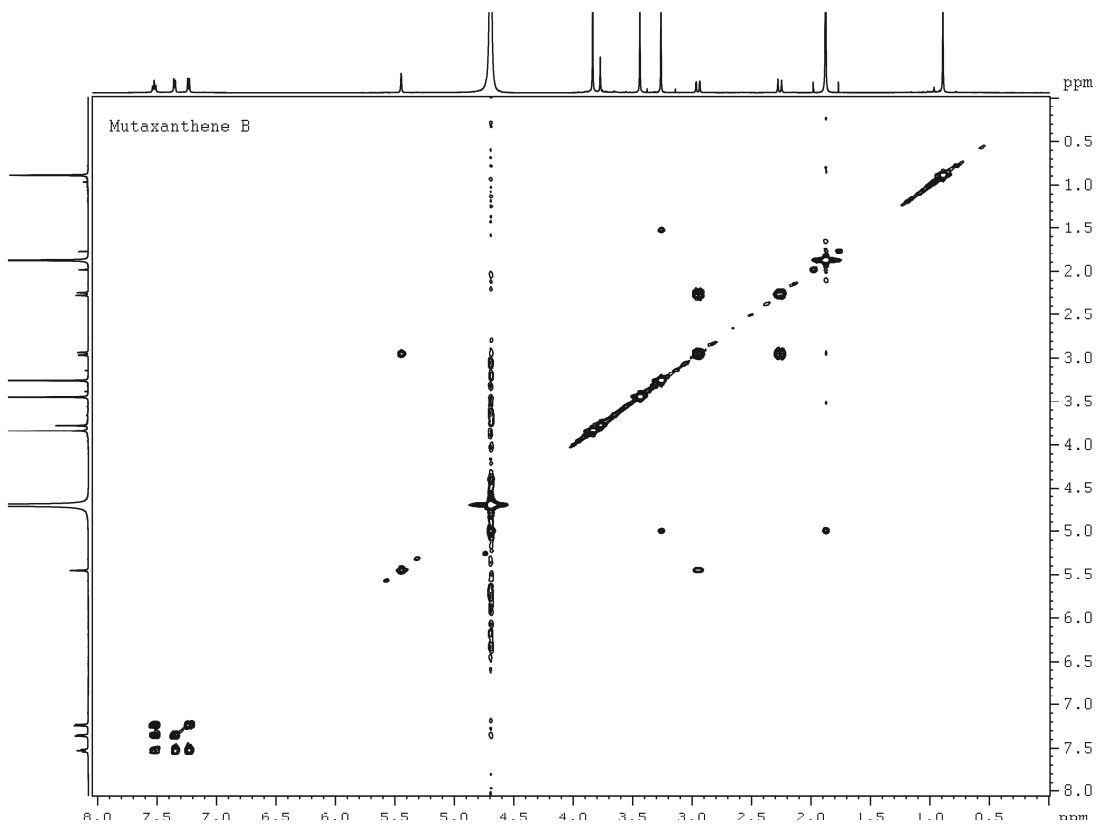

Figure S15. 2D COSY NMR of mutaxanthene B (2) in  $\text{D}_2\text{O}$ .

## B. Structure elucidation of mutaxanthenes

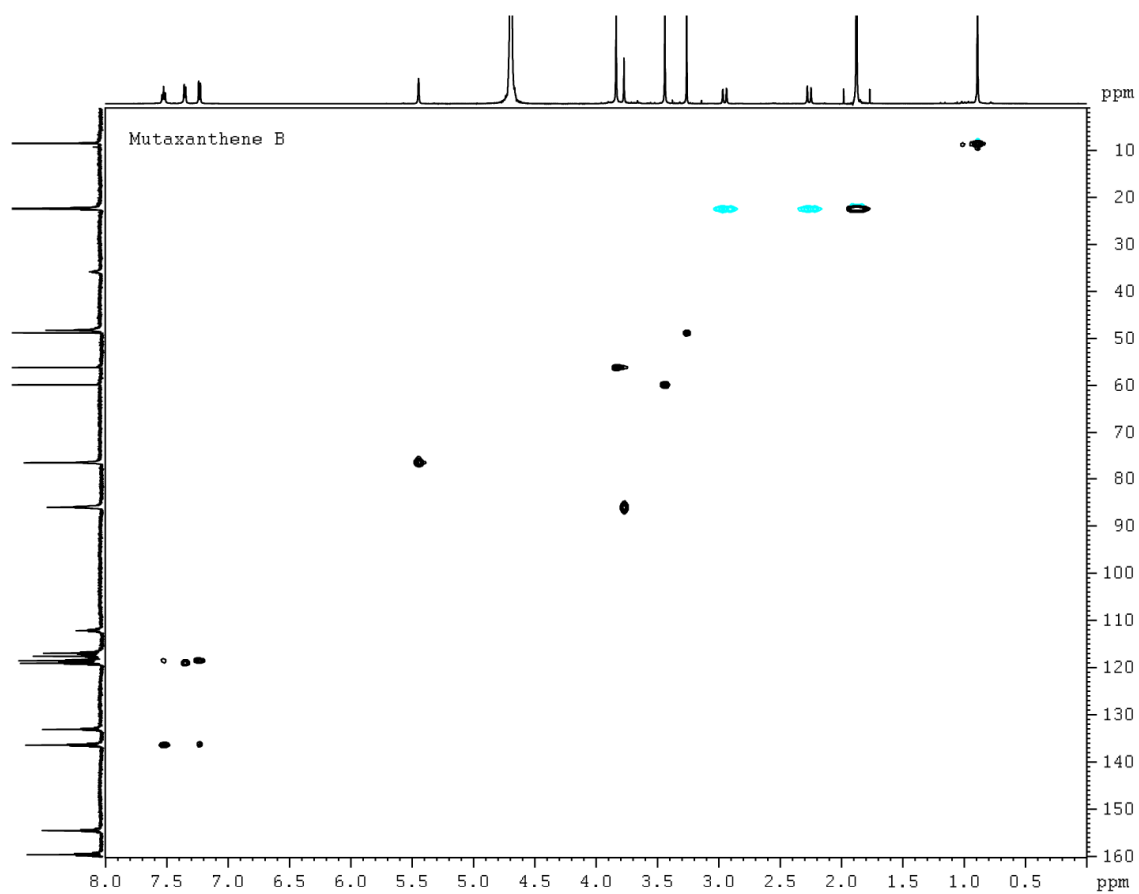

Figure S16. 2D HSQC NMR of mutaxanthene B (2) in D<sub>2</sub>O.

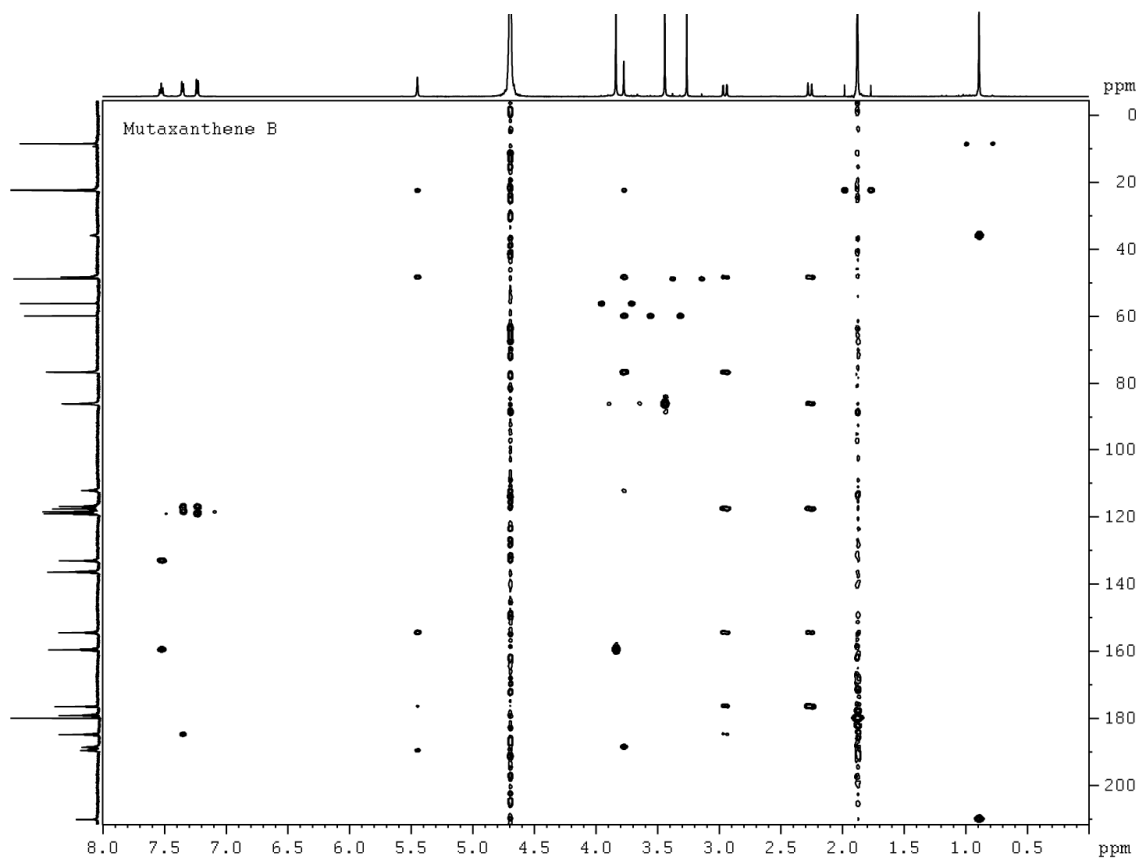

Figure S17. 2D HMBC NMR of mutaxanthene B (2) in D<sub>2</sub>O.

## B. Structure elucidation of mutaxanthenes

Mutaxanthene C

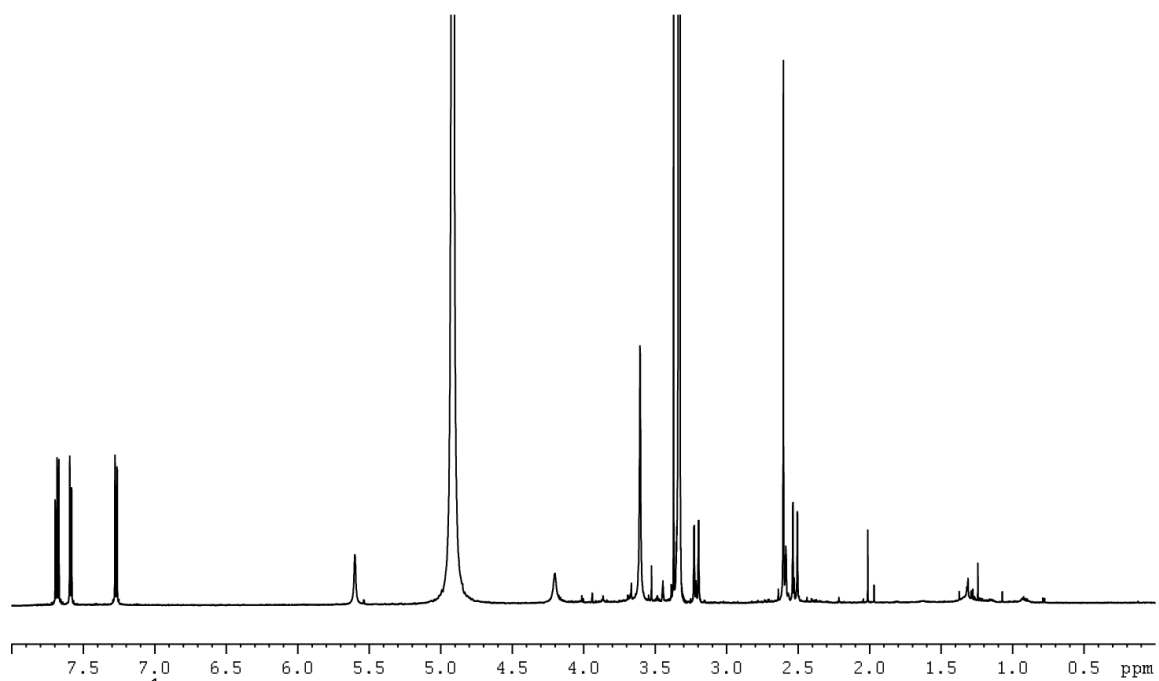

Figure S18.  $^1\text{H}$  proton NMR of mutaxanthene C (3) in  $\text{CD}_3\text{OD}$ .

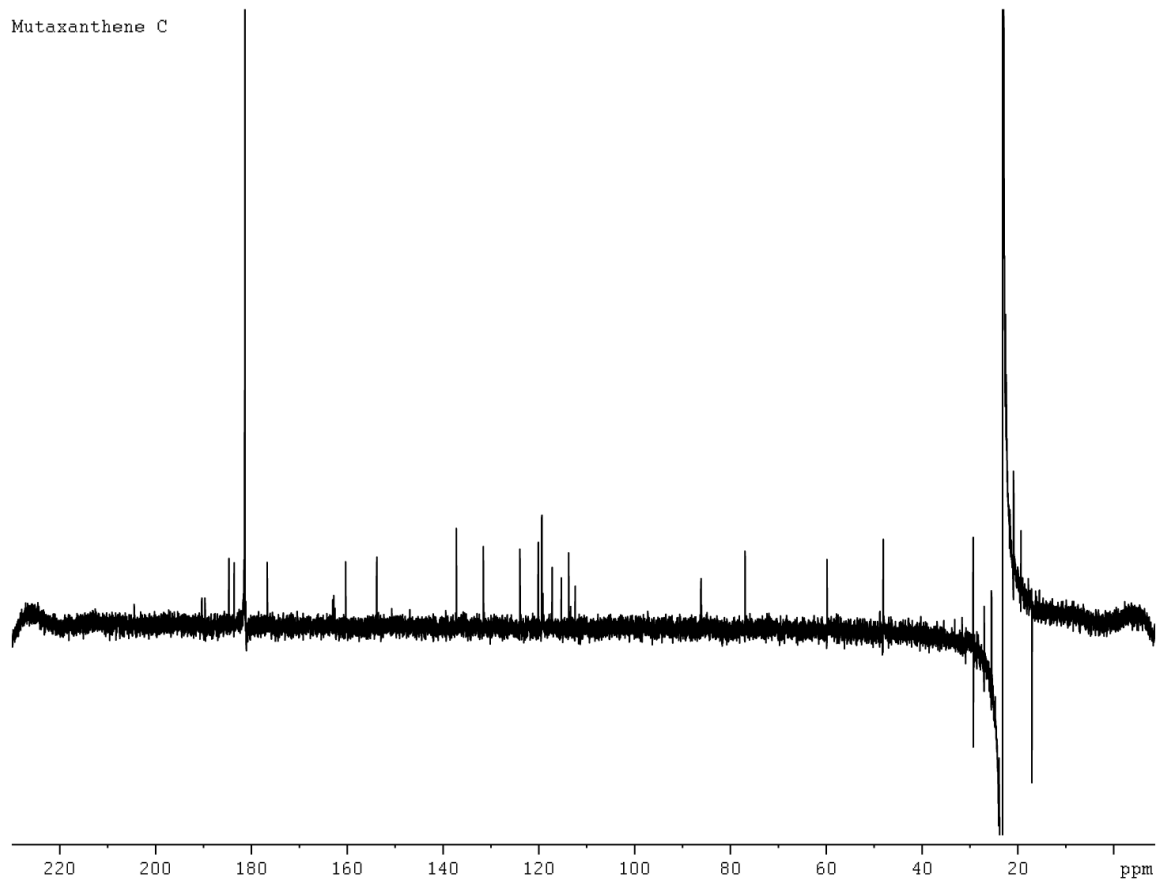

Figure S19.  $^{13}\text{C}$  carbon NMR of mutaxanthene C (2) in  $\text{D}_2\text{O}$ .

## B. Structure elucidation of mutaxanthenes

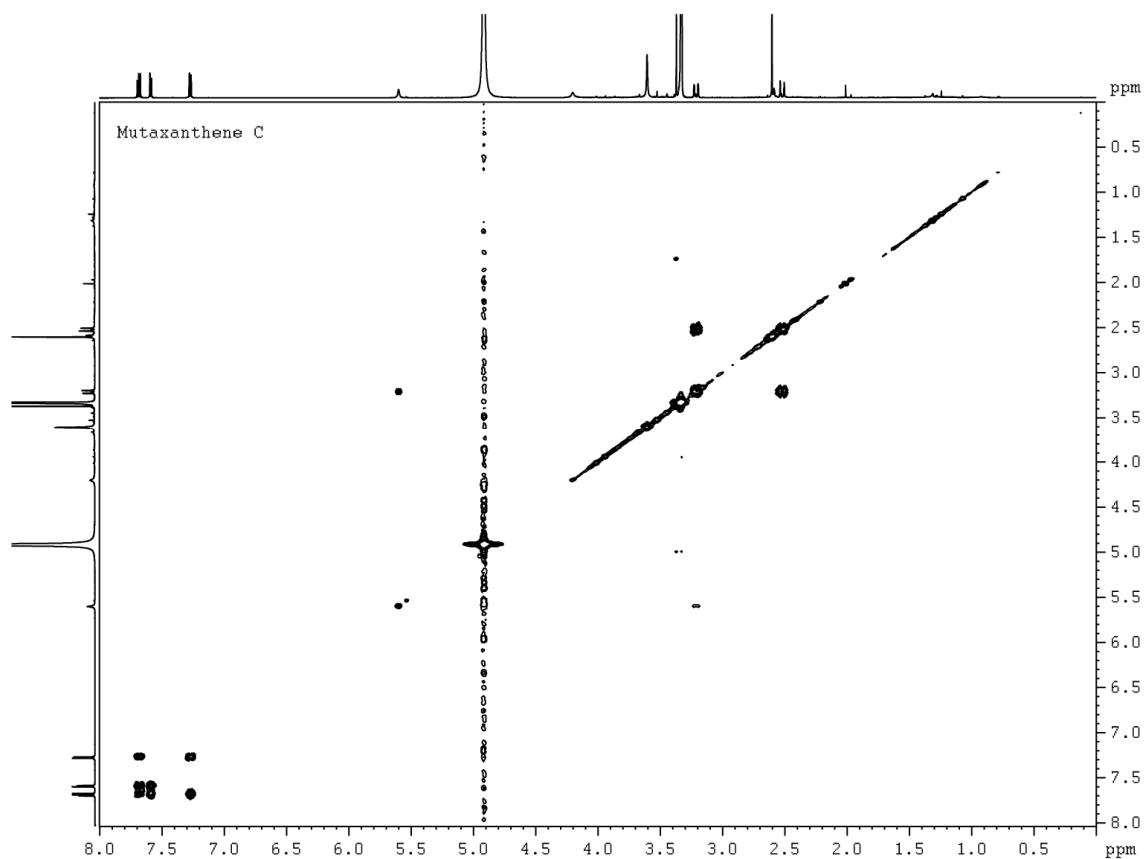

Figure S20. 2D COSY NMR of mutaxanthene C (**3**) in CD<sub>3</sub>OD.

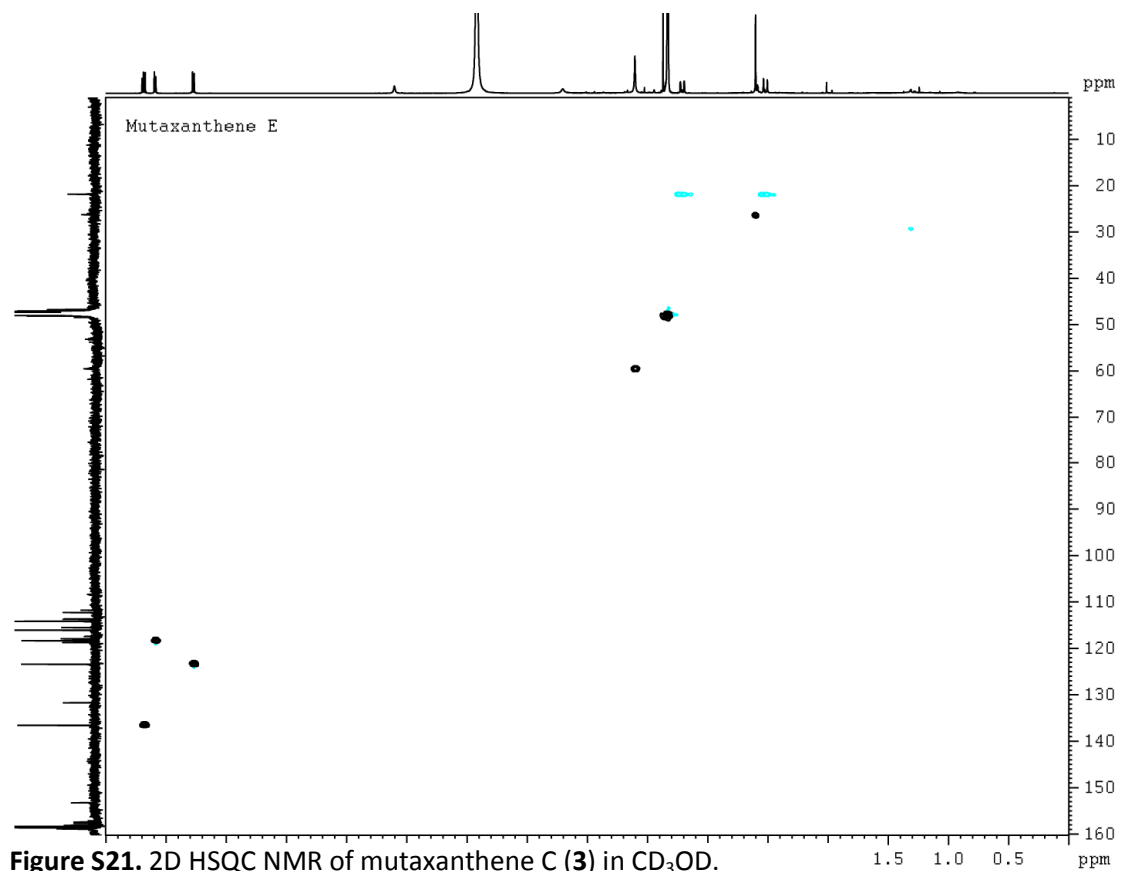

Figure S21. 2D HSQC NMR of mutaxanthene C (**3**) in CD<sub>3</sub>OD.



## B. Structure elucidation of mutaxanthenes

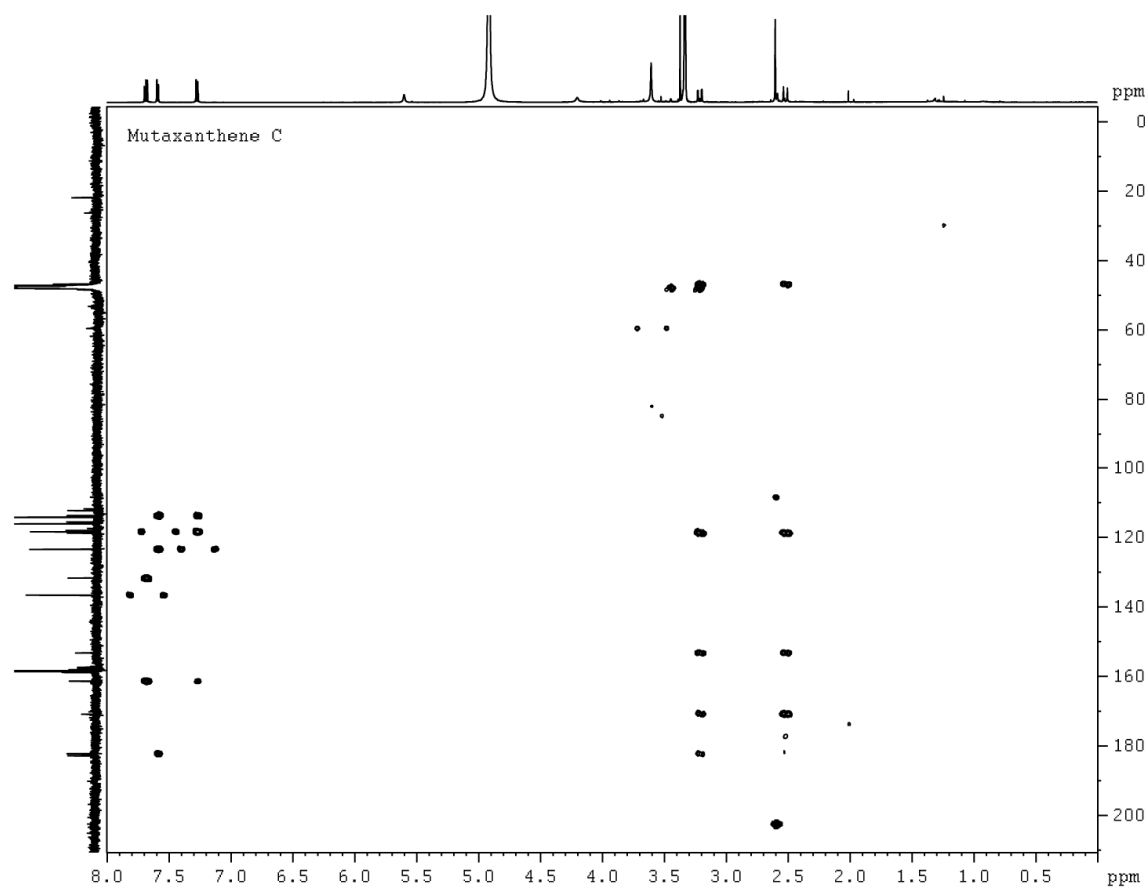

Figure S22. 2D HMBC NMR of mutaxanthene C (**3**) in CD<sub>3</sub>OD.

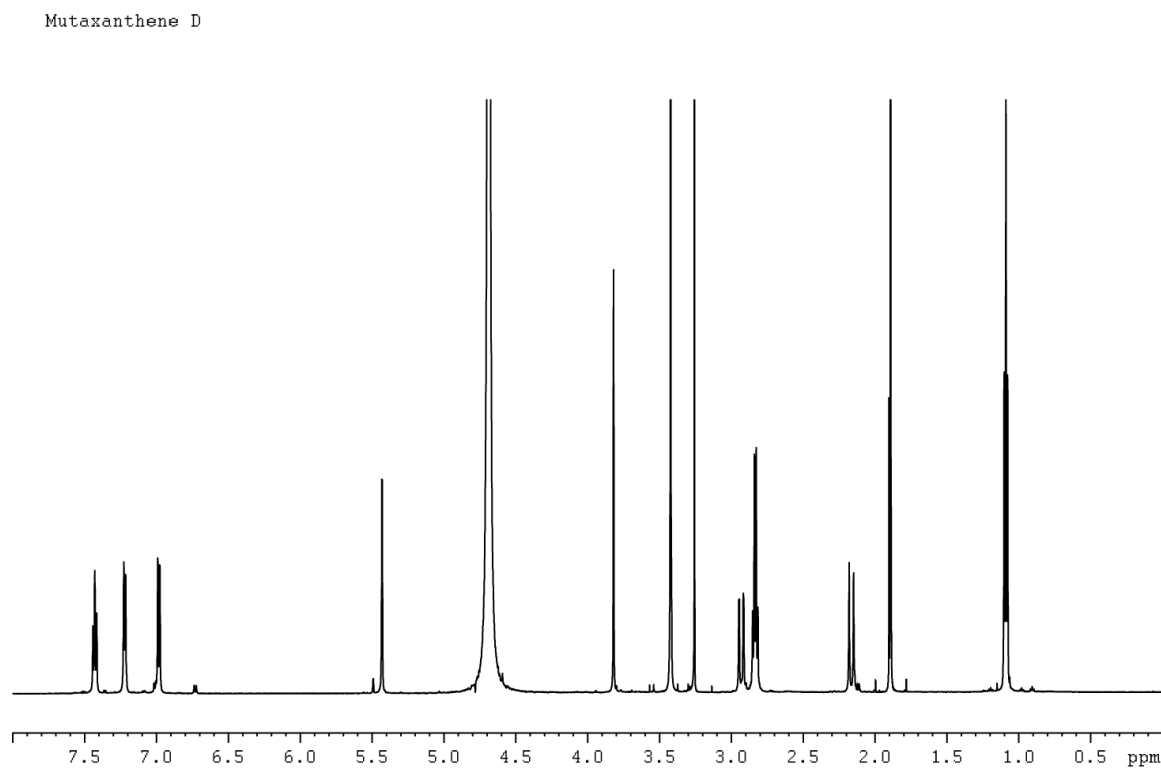

Figure S23. <sup>1</sup>H proton NMR of mutaxanthene D (**4**) in D<sub>2</sub>O.

## B. Structure elucidation of mutaxanthenes

Mutaxanthene D

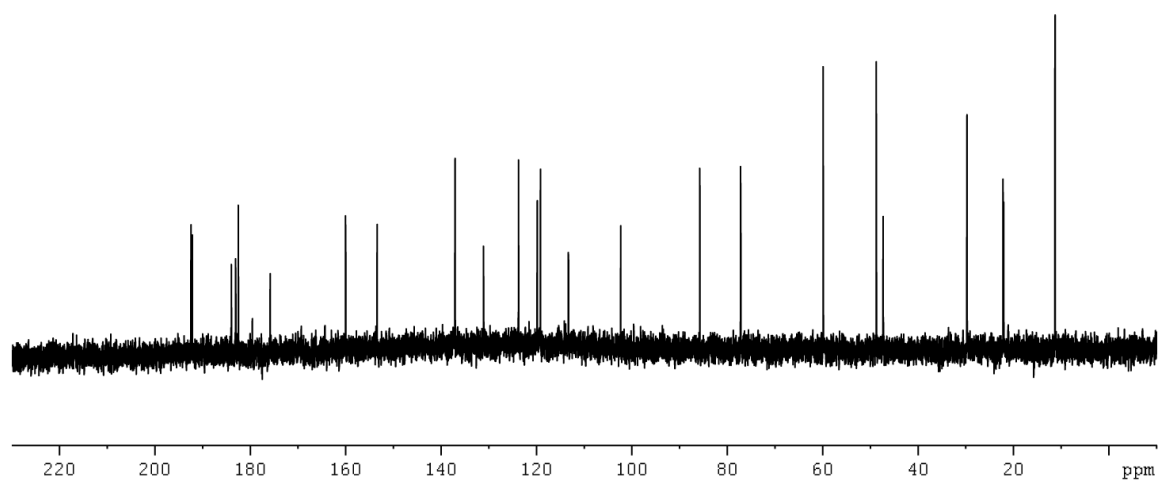

Figure S24.  $^{13}\text{C}$  carbon NMR of mutaxanthene D (4) in  $\text{D}_2\text{O}$ .

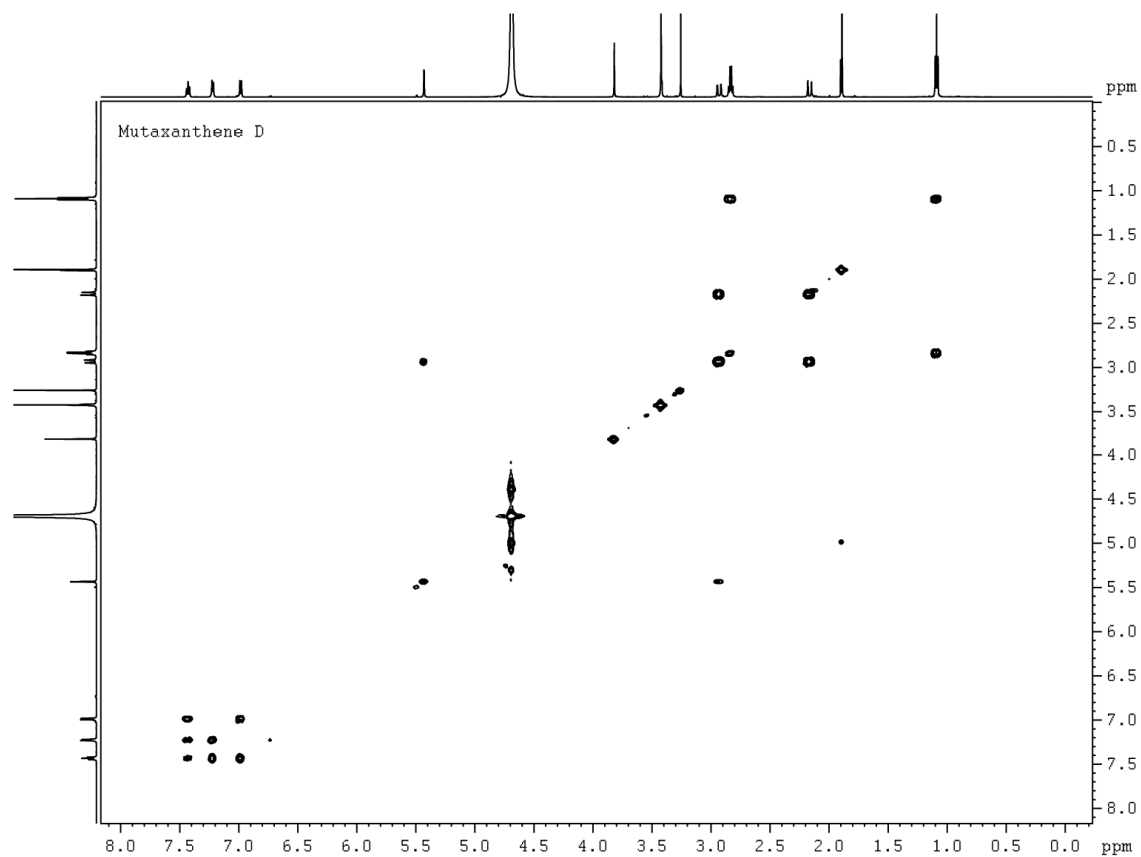

Figure S25. 2D COSY NMR of mutaxanthene D (4) in  $\text{D}_2\text{O}$ .

## B. Structure elucidation of mutaxanthenes

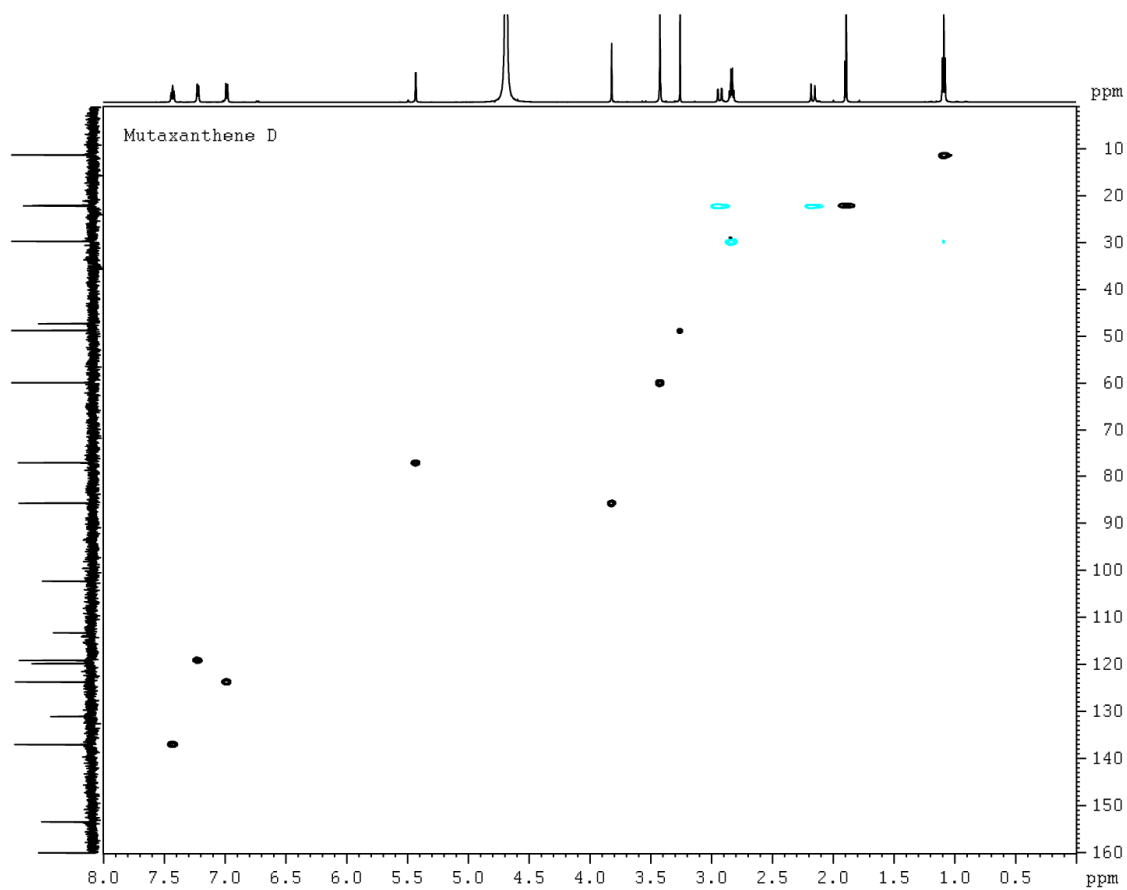

Figure S26. 2D HSQC NMR of mutaxanthene D (4) in D<sub>2</sub>O.

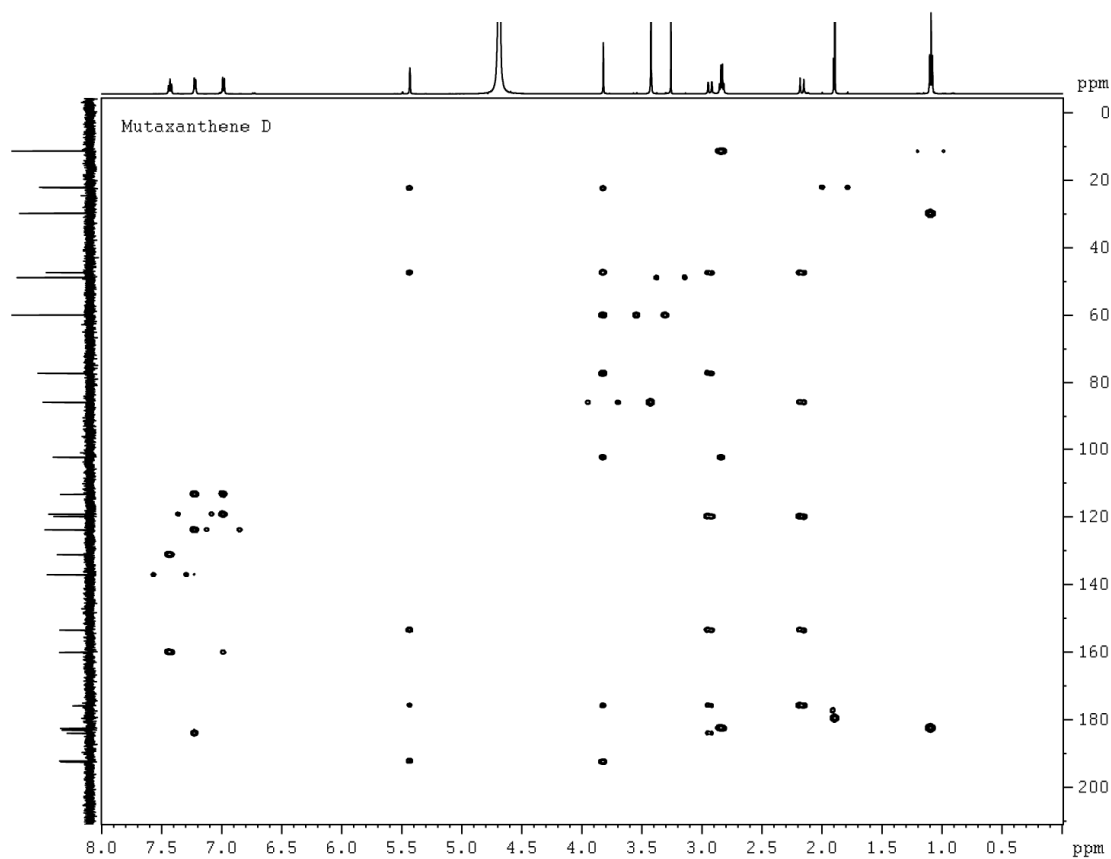

Figure S27. 2D HMBC NMR of mutaxanthene D (4) in D<sub>2</sub>O.

## B. Structure elucidation of mutaxanthenes

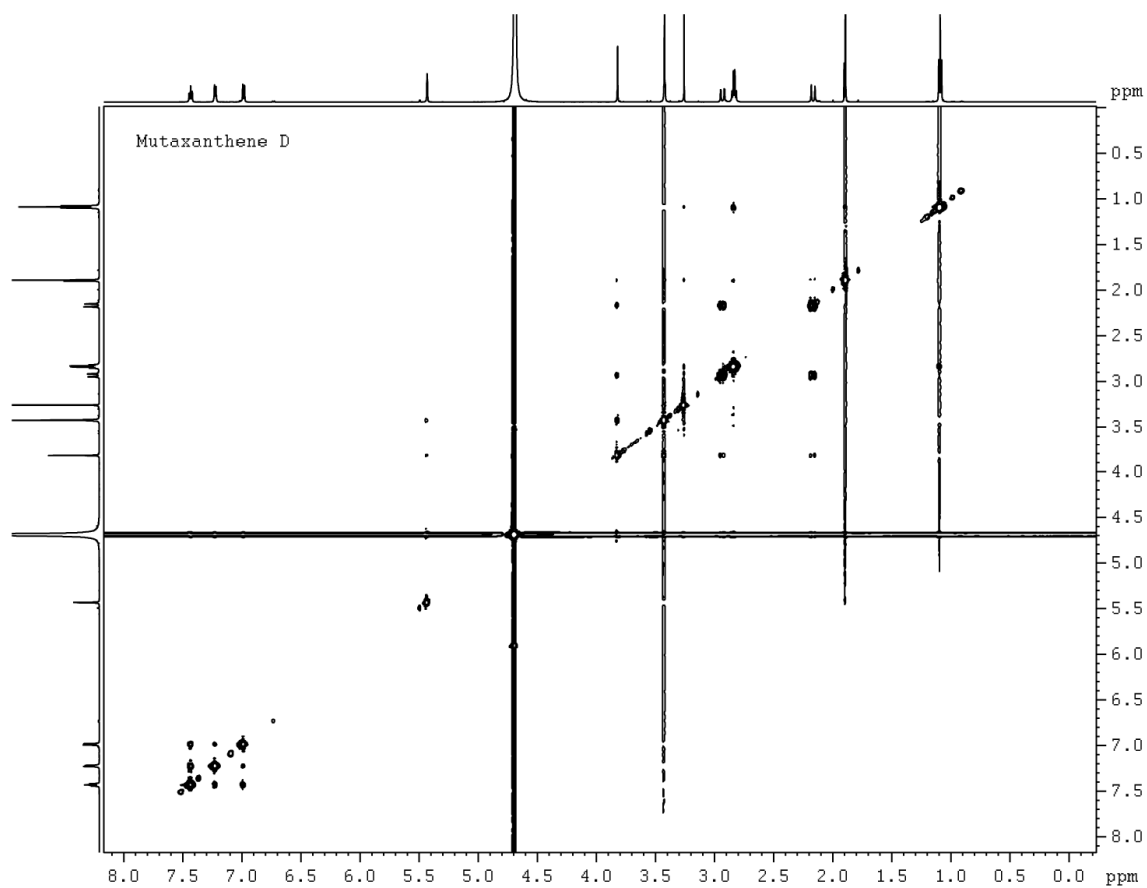

Figure S28. 2D NOESY NMR of mutaxanthene D (4) in D<sub>2</sub>O.

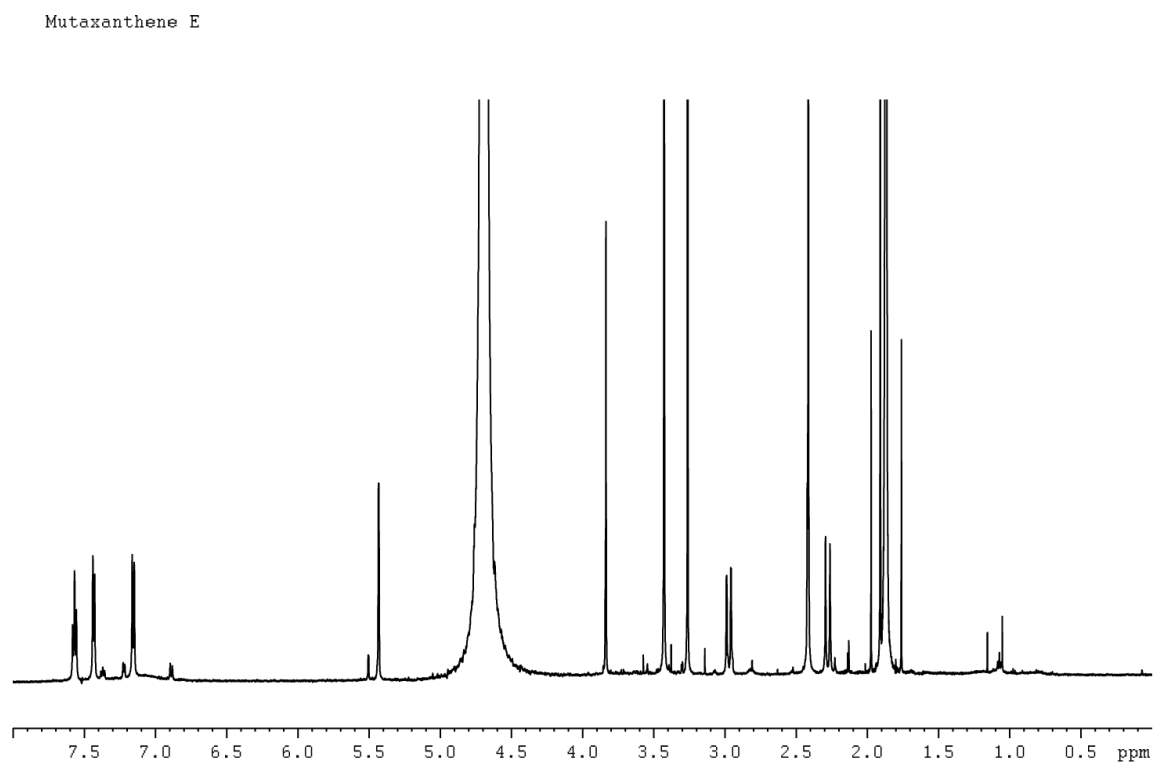

Figure S29. <sup>1</sup>H proton NMR of mutaxanthene E (5) in D<sub>2</sub>O.

## B. Structure elucidation of mutaxanthenes

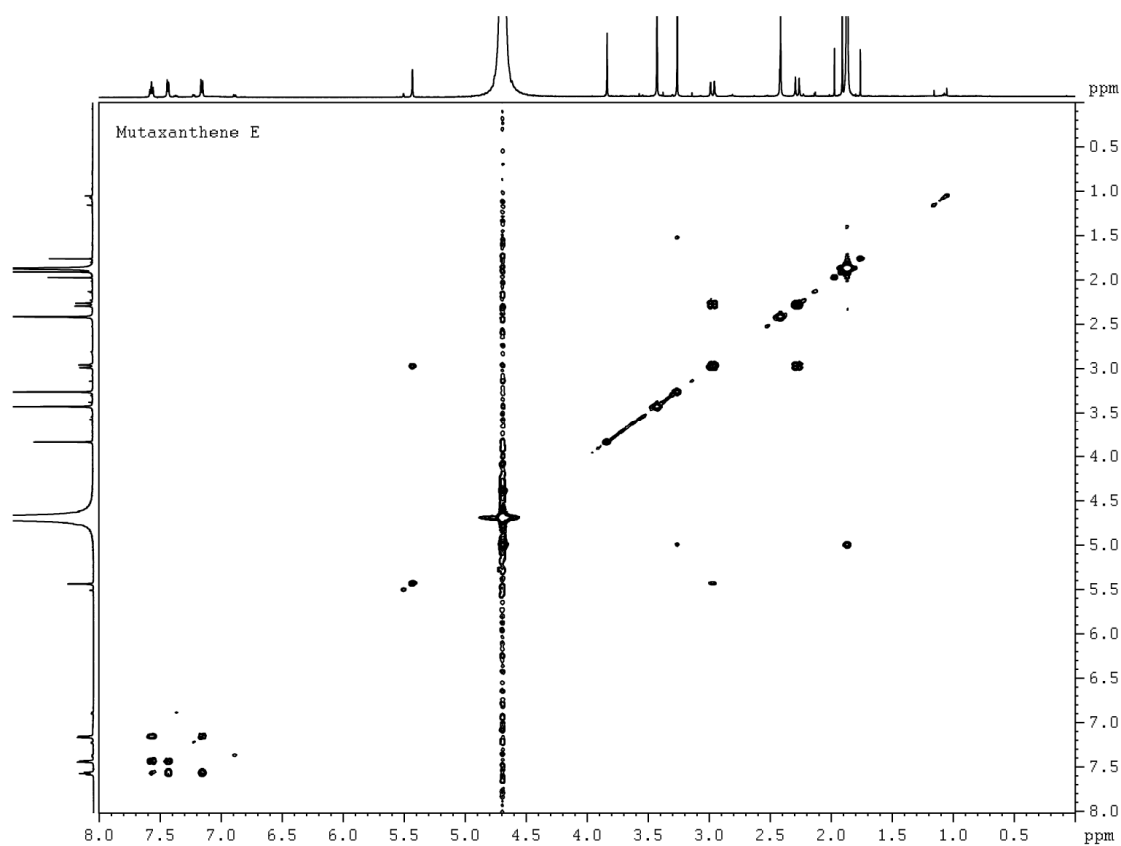

Figure S30. 2D COSY NMR of mutaxanthene E (5) in D<sub>2</sub>O.

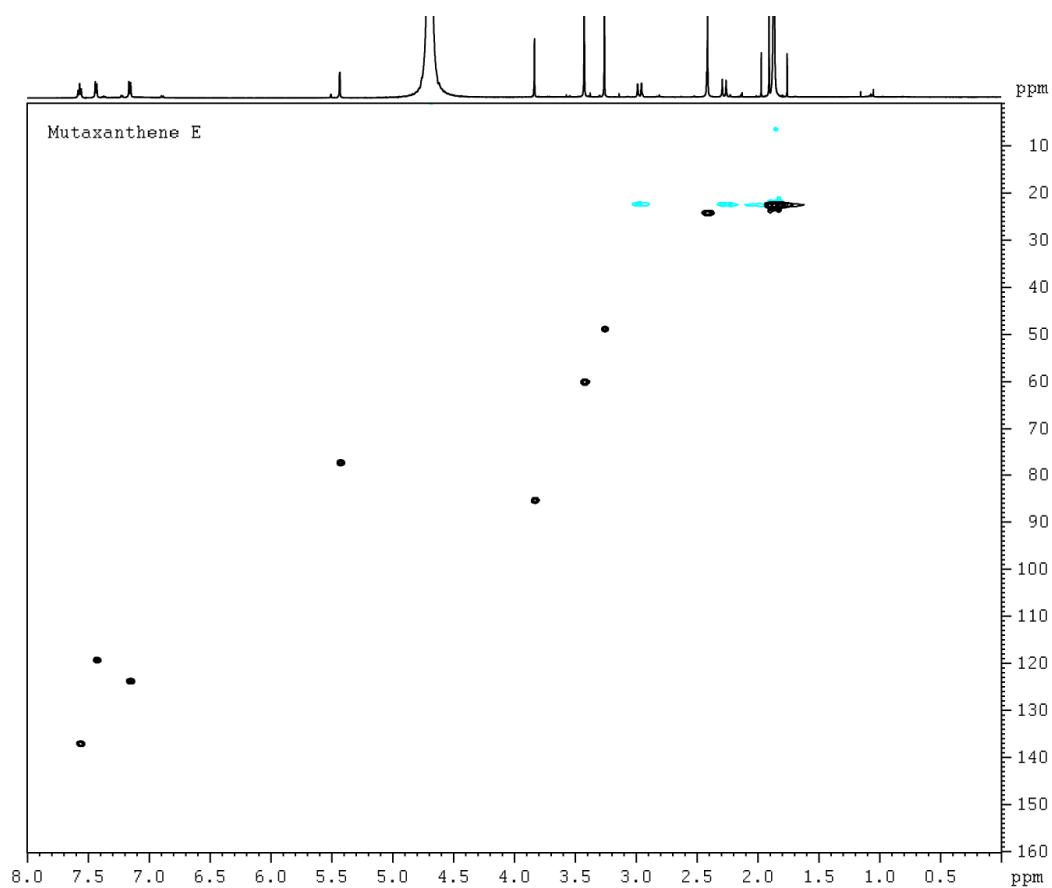

Figure S31. 2D HSQC NMR of mutaxanthene E (5) in D<sub>2</sub>O.

## B. Structure elucidation of mutaxanthenes

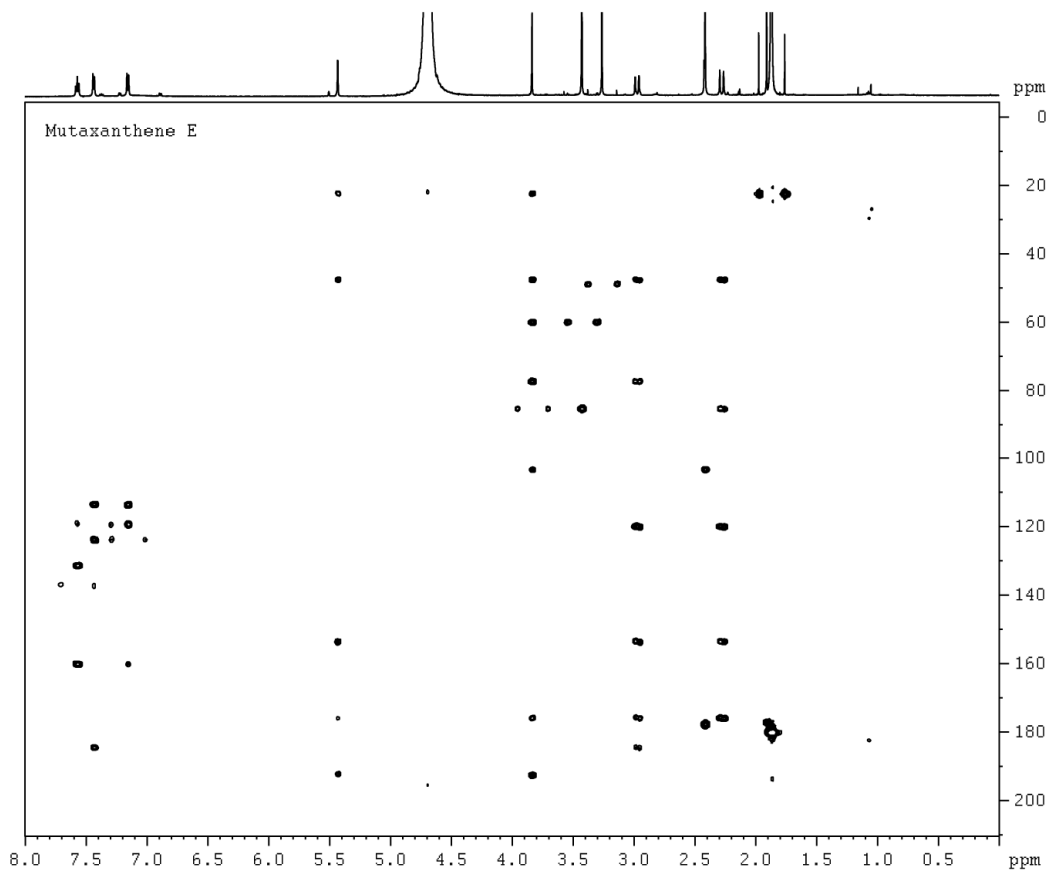

Figure S32. 2D HMBC NMR of mutaxanthene E (5) in D<sub>2</sub>O.

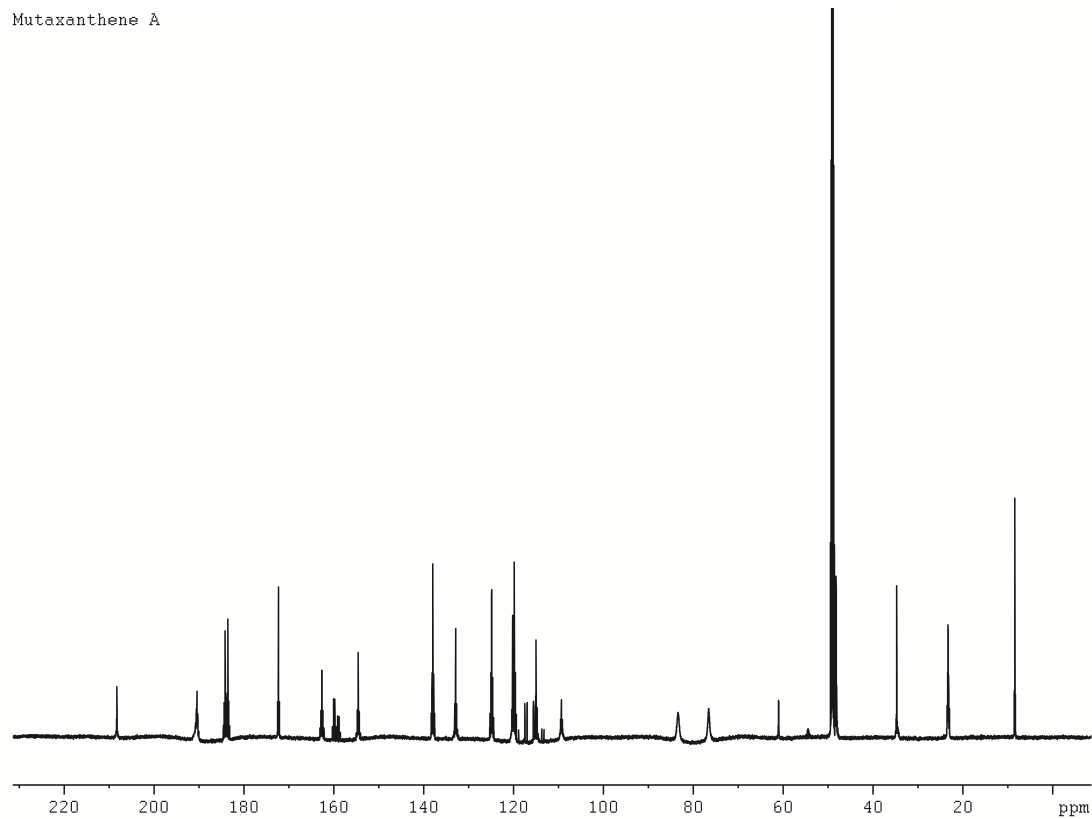

Figure S33. <sup>13</sup>C carbon NMR of mutaxanthene A (4) enriched with 1,2-<sup>13</sup>C sodium acetate in CD<sub>3</sub>OD.

## B. Structure elucidation of mutaxanthenes

Mutaxanthene A

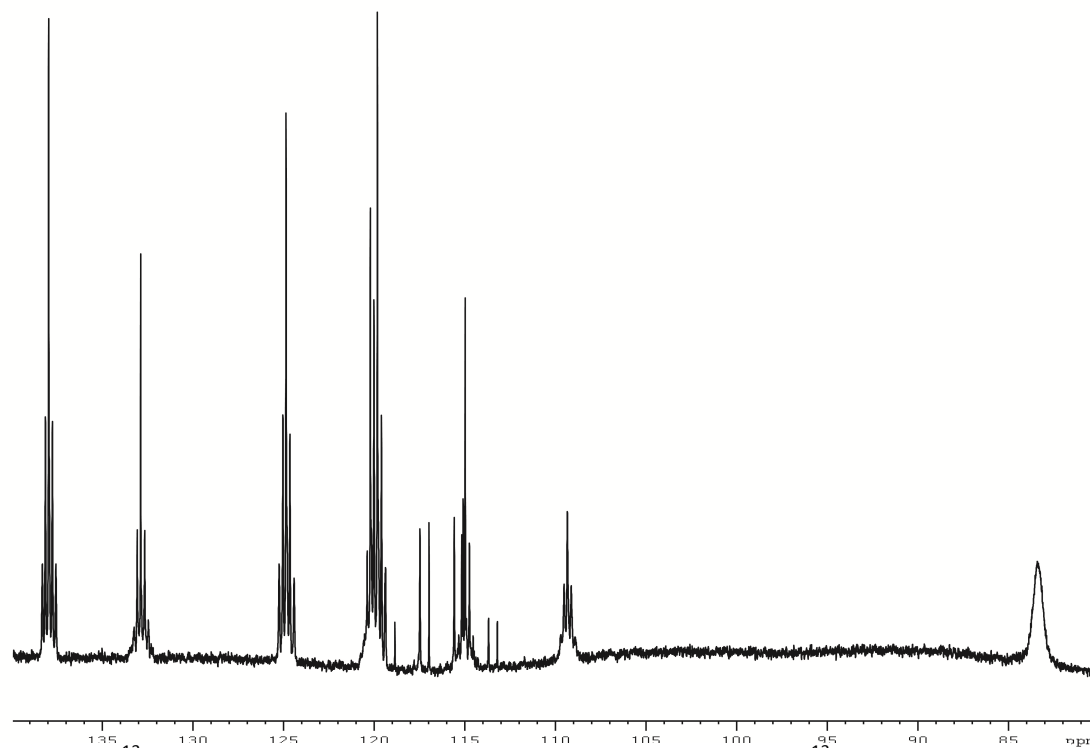

**Figure S34.**  $^{13}\text{C}$  carbon NMR of mutaxanthene A (**4**) enriched with  $1,2\text{-}^{13}\text{C}$  sodium acetate in  $\text{CD}_3\text{OD}$ .

Mutaxanthene D

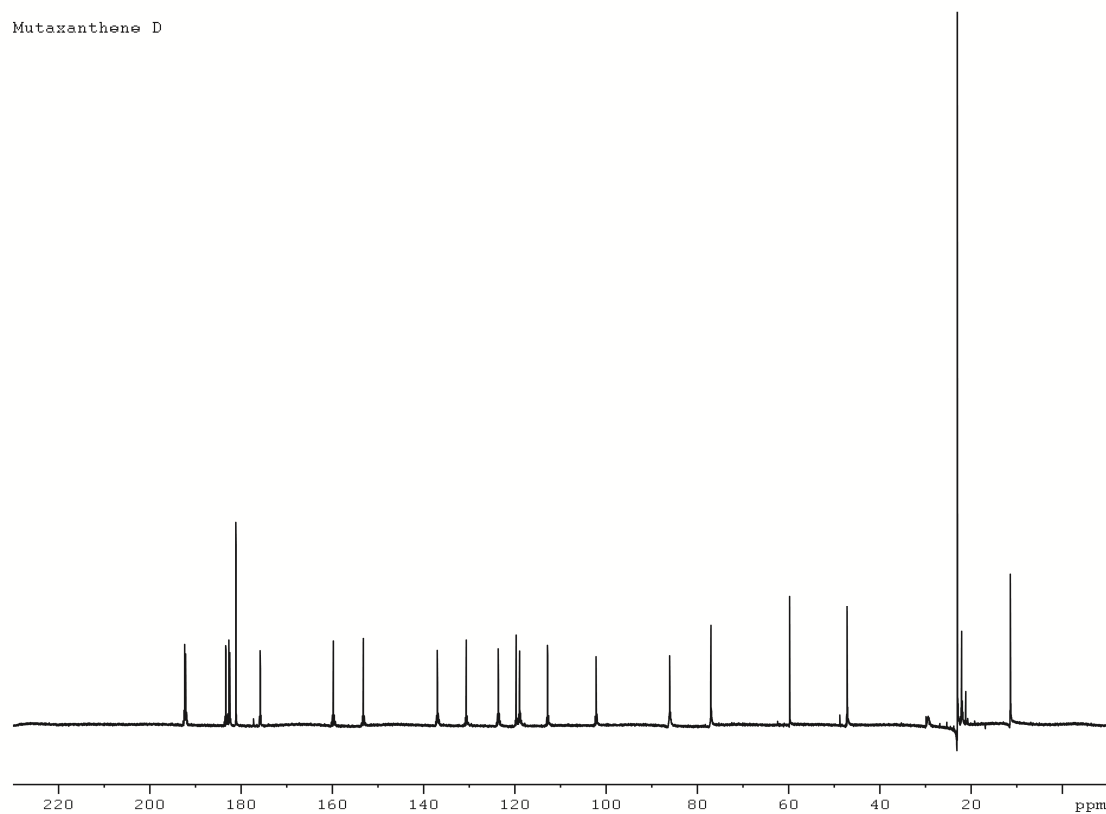

**Figure S35.**  $^{13}\text{C}$  proton NMR of mutaxanthene D (**4**) enriched with  $1,2\text{-}^{13}\text{C}$  sodium acetate in  $\text{CD}_3\text{OD}$ .

## B. Structure elucidation of mutaxanthenes

Mutaxanthene D

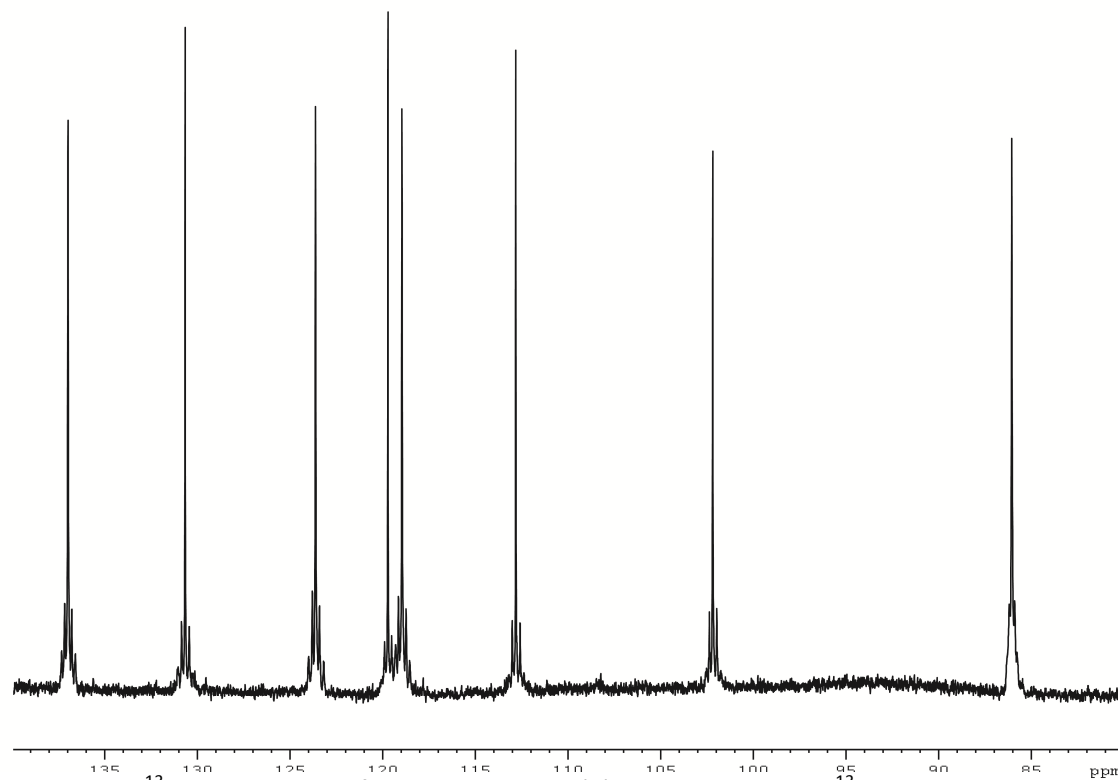

**Figure S36.**  $^{13}\text{C}$  carbon NMR of mutaxanthene D (**4**) enriched with 1,2- $^{13}\text{C}$  sodium acetate in  $\text{CD}_3\text{OD}$ .



### C. Genetic Analysis of putative mutaxanthene gene cluster

**Table S7.** Deduced functions of ORFs in the mutaxanthene biosynthetic gene cluster

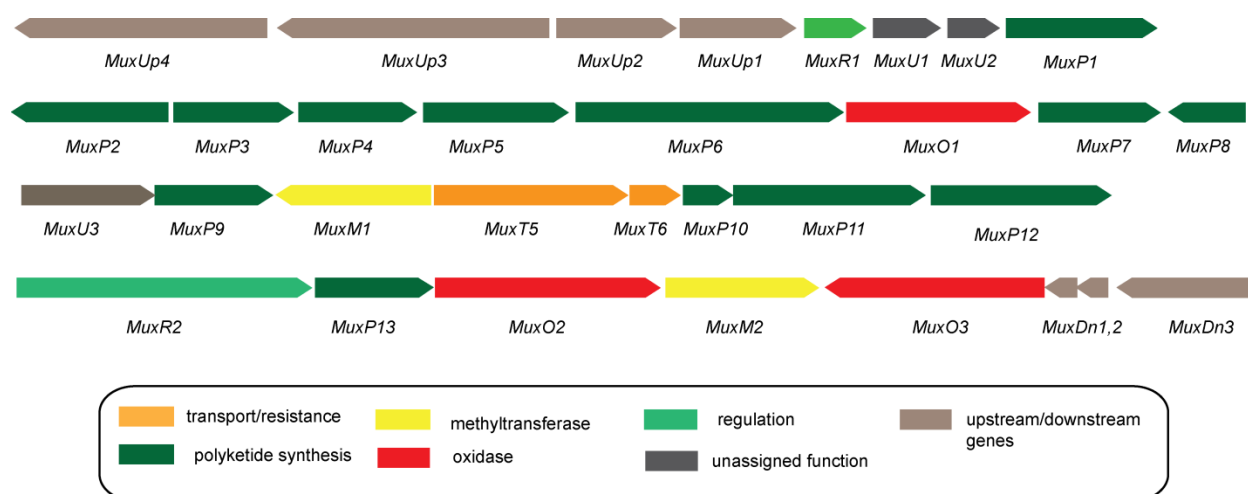

| gene          | size (aa) | similar protein                                 | GeneBank accession numbers | Identity(%)/similarity(%) | proposed function                     |
|---------------|-----------|-------------------------------------------------|----------------------------|---------------------------|---------------------------------------|
| <i>MuxUp4</i> | -577      | SSMG_06347, Streptomyces sp. AA4                | ZP_07282307                | 99/99                     | ABC transporter                       |
| <i>MuxUp3</i> | -627      | SSMG_06347, Streptomyces sp. AA4                | ZP_07282307.1              | 99/98                     | ABC transporter                       |
| <i>MuxUp2</i> | 254       | SSMG_06348, Streptomyces sp. AA4                | ZP_07282308                | 96/98                     | ABC transporter                       |
| <i>MuxUp1</i> | 247       | SSMG_06349, Streptomyces sp. AA4                | ZP_07282309                | 96/98                     | ABC transporter                       |
| <i>MuxR2</i>  | 114       | SSMG_06351, Streptomyces sp. AA4                | ZP_07282311                | 97/96                     | PadR fam.transcriptional repressor    |
| <i>MuxU1</i>  | 128       | SSMG_06350                                      | ZP_07282310                | 94/98                     | hypothetical protein                  |
| <i>MuxU2</i>  | 91        | SSMG_06352                                      | ZP_07282312.1              | 97/94                     | hypothetical protein                  |
| <i>MuxP1</i>  | 332       | AlkNF, Streptomyces galilaeus                   | BAB72049                   | 69/55                     | type II acyl transferase (AT)         |
| <i>MuxP2</i>  | -345      | CosE, Streptomyces olindensis                   | ABC00733                   | 56/69                     | type II ketosynthase (KS) for starter |
| <i>MuxP3</i>  | 258       | PokC2, Streptomyces diastatochromogenes         | ACN64846                   | 78/65                     | type II polyketide cyclase            |
| <i>MuxP4</i>  | 250       | PokT1, Streptomyces diastatochromogenes         | ACN64844.1                 | 64/50                     | type II ketoreductase (KR)            |
| <i>MuxP5</i>  | 320       | orf6, Streptomyces echinatus                    | ABL09954                   | 69/57                     | type II cyclase/dehydratase           |
| <i>MuxP6</i>  | 618       | Sfla_5326,Streptomyces flavogriseus             | YP_004926240               | 60/47                     | acyl CoA ligase                       |
| <i>MuxO1</i>  | 412       | Sfla_5326,Streptomyces flavogriseus             | YP_004926243.1             | 70/55                     | flavin-dependent oxidase              |
| <i>MuxD1</i>  | 262       | simA6, Streptomyces antibioticus                | AF324838_6                 | 86/75                     | type II ketoreductase                 |
| <i>MuxP7</i>  | -154      | SnoaL_4, uncultured bacterium (expressed)       | AEM44306.1                 | 60/51                     | type II cyclase/dehydratase           |
| <i>MuxU3</i>  | 288       | none                                            | --                         | --                        | hypothetical protein                  |
| <i>MuxD2</i>  | 253       | Strvi_4376, Streptomyces violaceusniger Tu 4113 | YP_004814300               | 61/42                     | type II ketoreductase (KR)            |
| <i>MuxM1</i>  | -341      | phzM, Saccharopolyspora erythraea               | YP_001106227               | 57/43                     | O-methyltransferase                   |
| <i>MuxT4</i>  | 438       | SAV_5944,Streptomyces avermitilis               | NP_827121                  | 63/47                     | transport efflux                      |
| <i>MuxT5</i>  | 84        | Sros_2592, Streptosporangium roseum             | YP_003338305               | 72/50                     | transport efflux                      |
| <i>MuxP8</i>  | 86        | ChaC, Streptomyces chartreusis                  | CAH10163                   | 69/51                     | type II acyl carrier protein (ACP)    |
| <i>MuxP9</i>  | 431       | ORF32, uncultured bacterium (expressed)         | AEM44309                   | 85/74                     | type II beta-ketoacyl synthase (KS)   |
| <i>MuxP10</i> | 402       | ORF2, uncultured bacterium (expressed)          | AEM44279.1                 | 66/53                     | type II beta-ketoacyl synthase (KS)   |
| <i>MuxR3</i>  | 681       | RubS, Streptomyces collinus                     | AAM97369.1                 | 55/41                     | SARP type transcriptional activator   |
| <i>MuxD3</i>  | 252       | ORF2, uncultured bacterium (expressed)          | AEM44279                   | 66/53                     | type II ketoreductase (KR)            |
| <i>MuxO2</i>  | 511       | ORF20, uncultured bacterium (expressed)         | AEM44297                   | 71/61                     | flavin-dependent oxidase              |
| <i>MuxM2</i>  | 335       | SsfM1, Streptomyces sp. SF2575                  | ADE34508.1                 | 72/89                     | O-methyltransferase                   |
| <i>MuxO3</i>  | -500      | ovmOI, Streptomyces antibioticus                | CAG14963.1                 | 63/50                     | flavin-dependent oxidase              |

### D. Mass Spectral Data for Selected Features

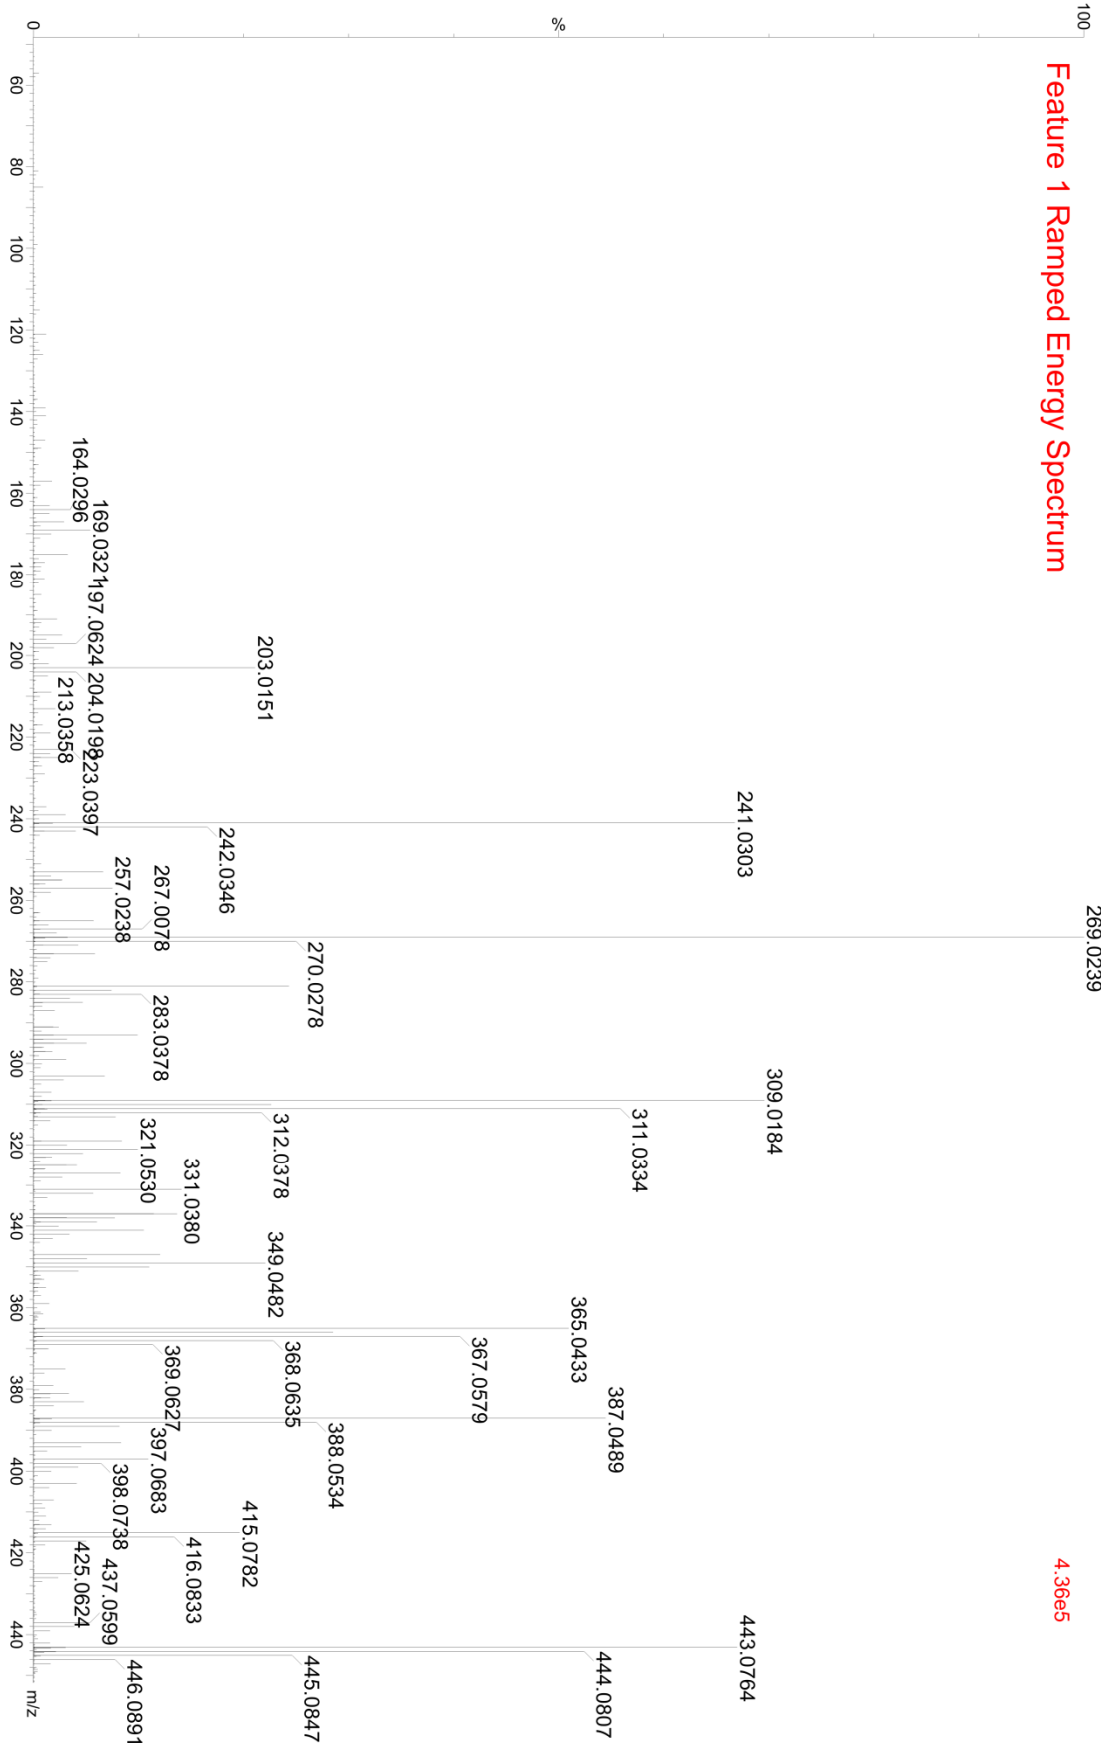

Figure S37. Mobility separated ramped energy mass spectrum for feature 1, Mutaxanthene A.

## D. Mass Spectral Data for Selected Features

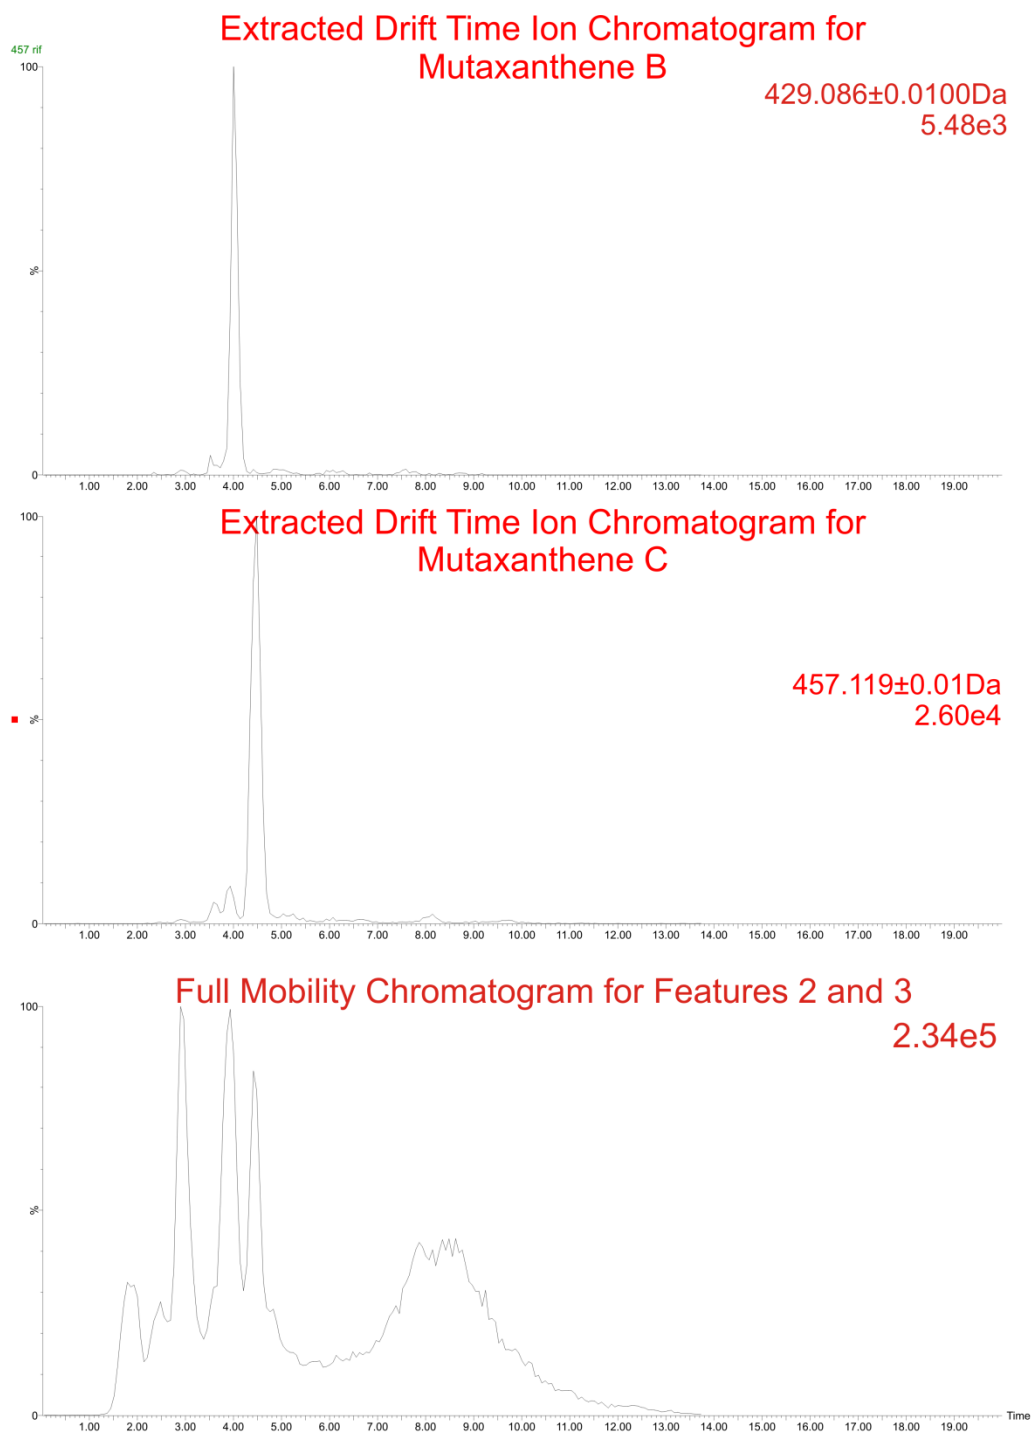

**Figure S38.** Retention time selected drift time chromatograms and extracted drift time ion chromatograms for coeluting mutaxantenes B and C. Using mobility separation, fragmentation profiles for each were extracted.

### D. Mass Spectral Data for Selected Features

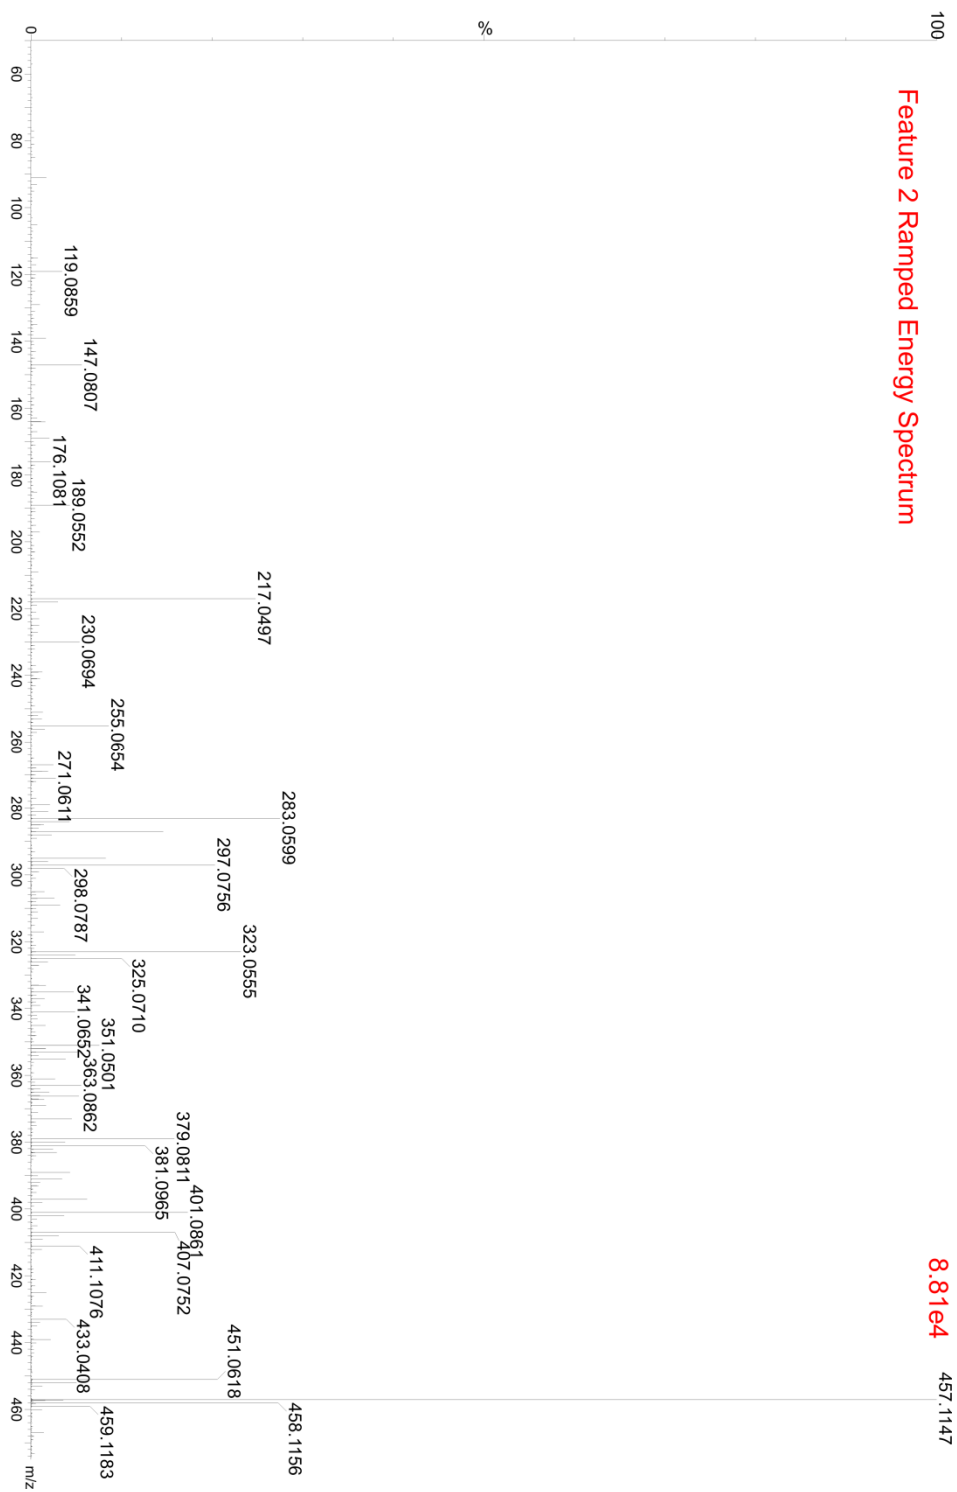

Figure S39. Mobility separated ramped energy mass spectrum for feature 2, Mutaxanthene C.

### D. Mass Spectral Data for Selected Features

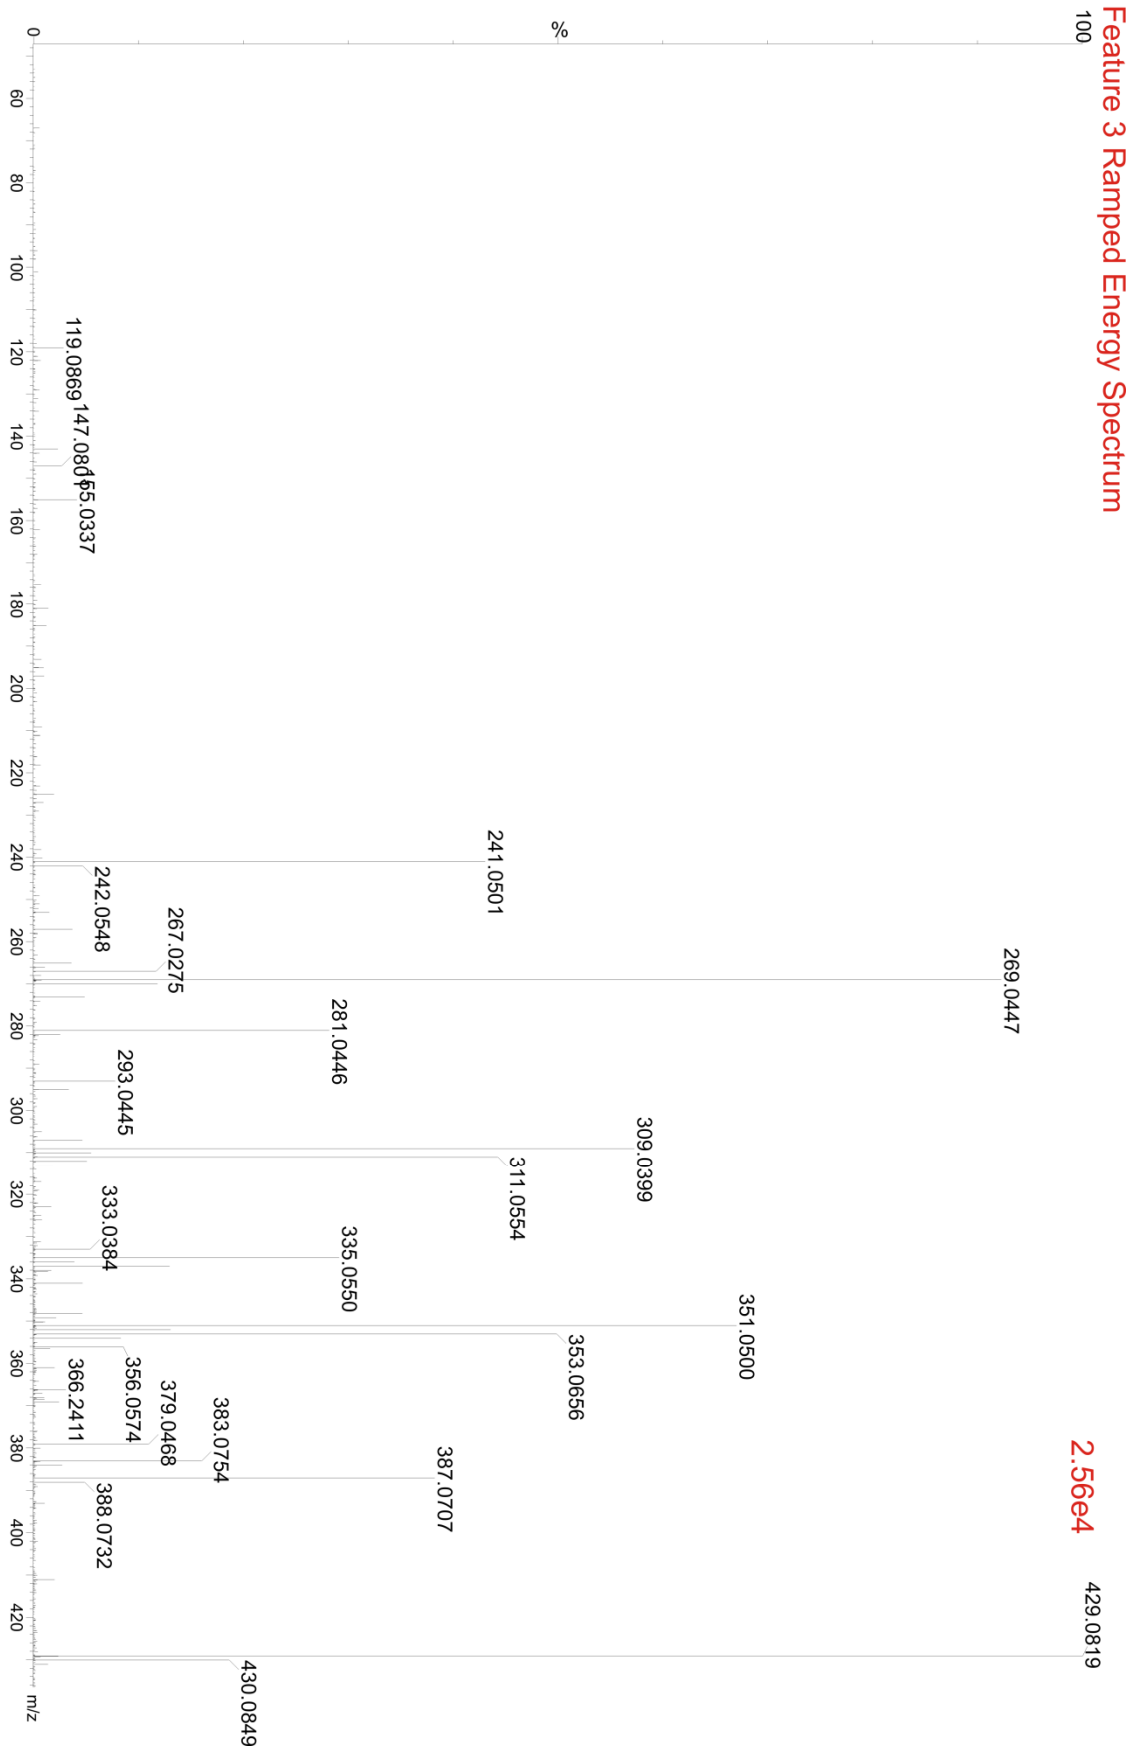

Figure S40. Mobility separated ramped energy mass spectrum for feature 3, Mutaxanthene B.

### D. Mass Spectral Data for Selected Features

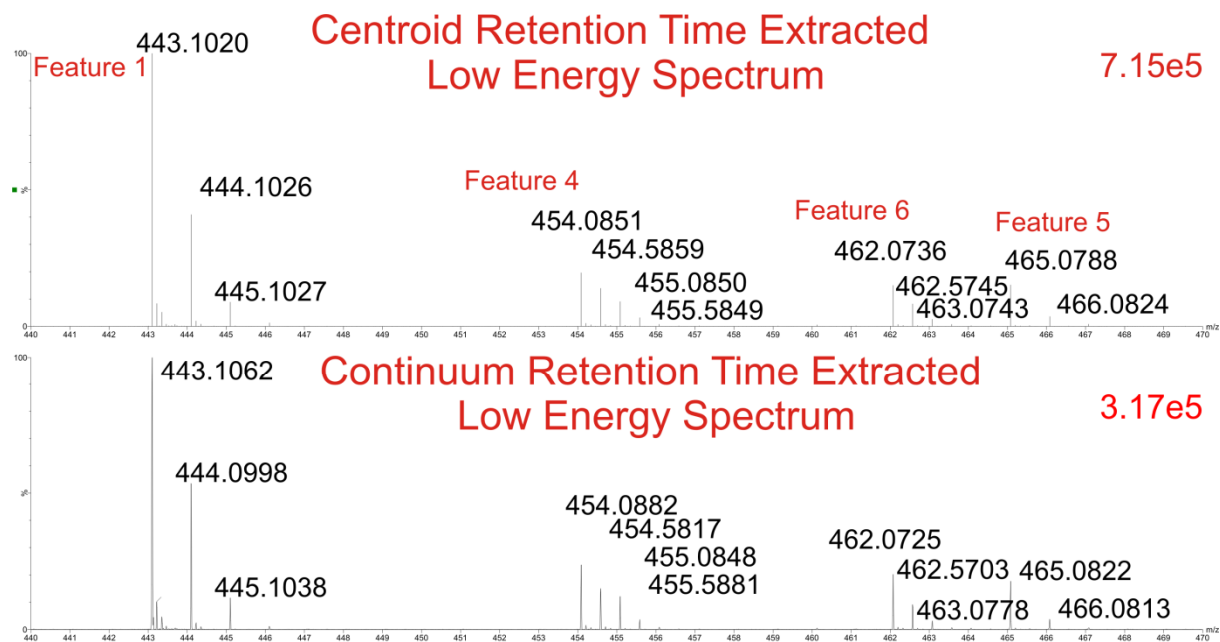

**Figure S41.** Retention time extracted low energy spectrum demonstrating Mutaxanthene A adducts.

## D. Mass Spectral Data for Selected Features

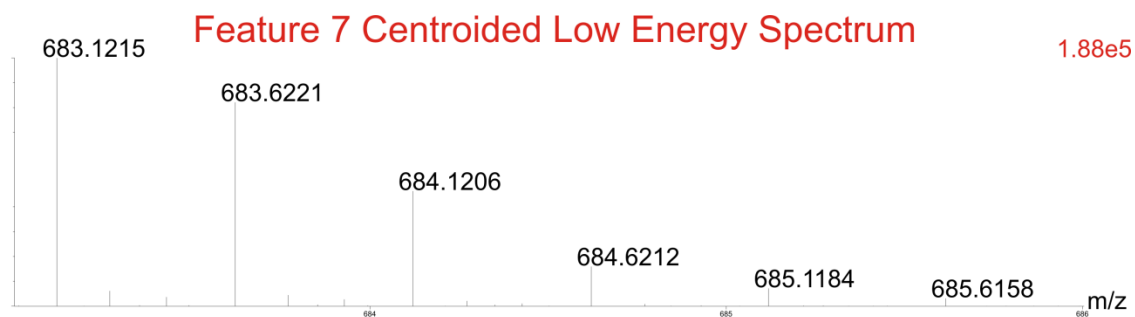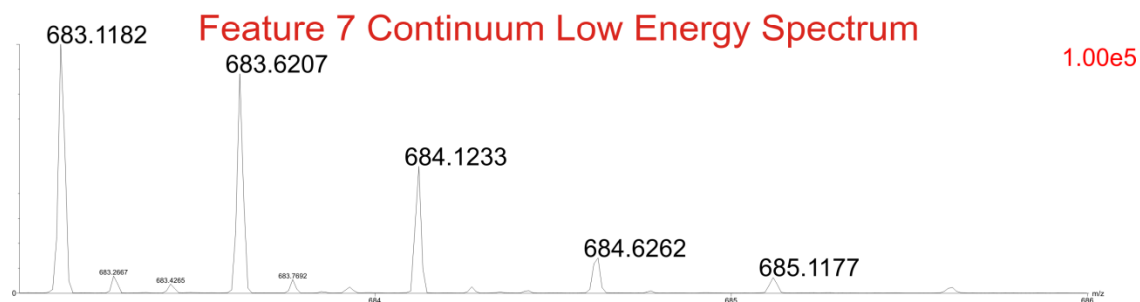

**Figure S42.** Retention time extracted low energy spectrum displaying feature 7 isotopic envelope.

### D. Mass Spectral Data for Selected Features

C21 H30 N O4

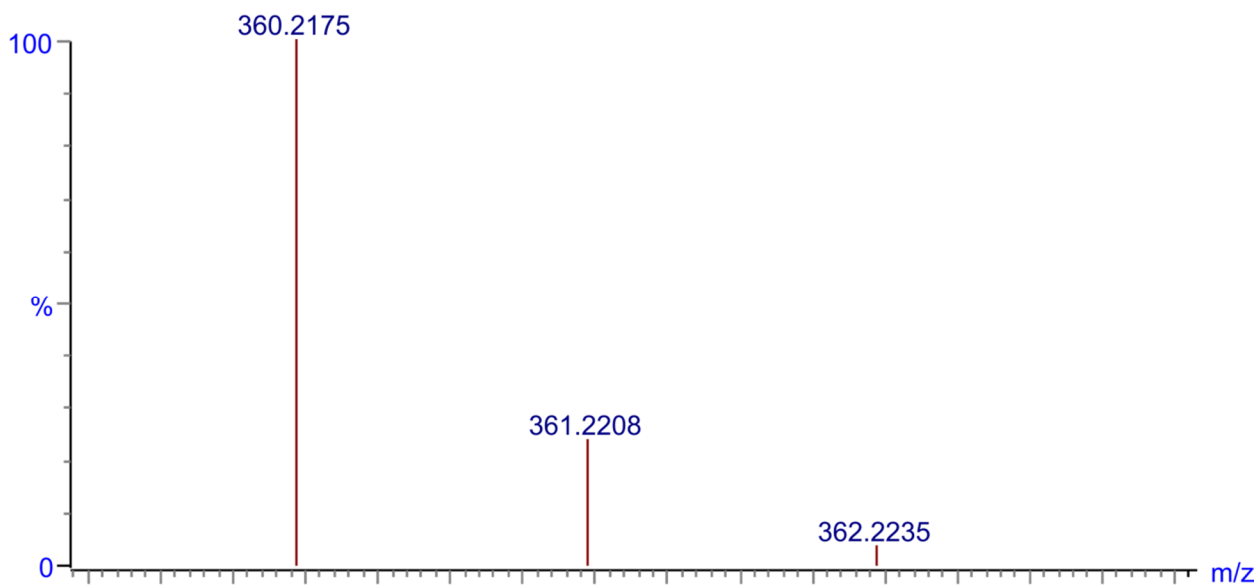

Feature 8 [M+H]<sup>+</sup>

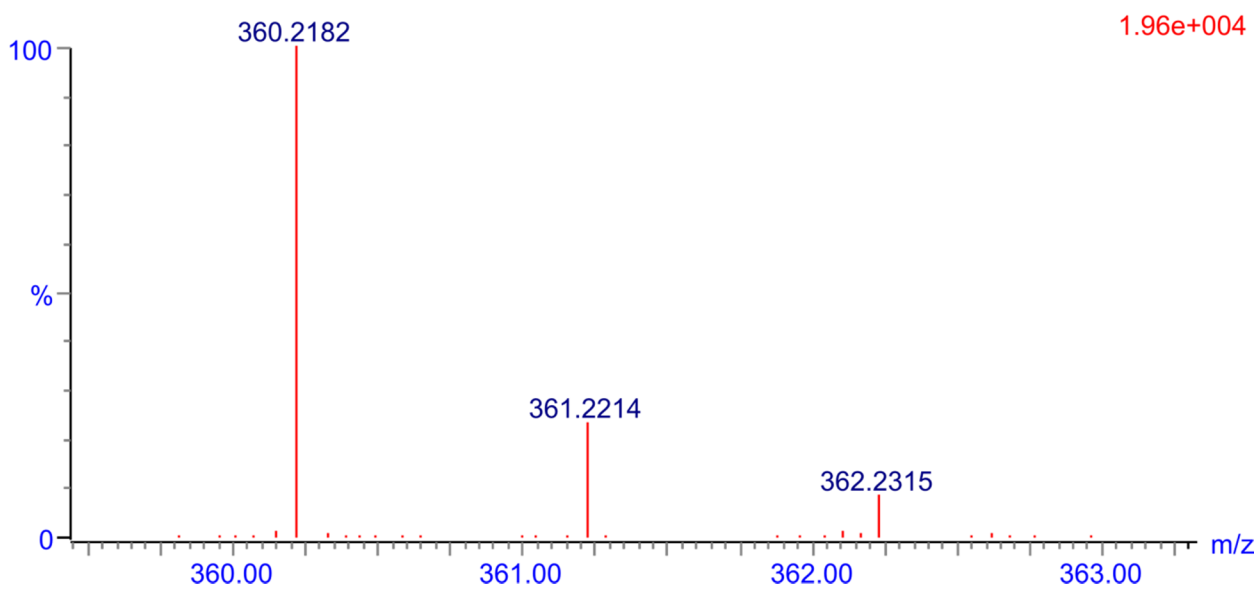

**Figure S43. (Above)** Theoretical isotopic profile for [C<sub>21</sub>H<sub>29</sub>NO<sub>4</sub>+H]<sup>+</sup>. **(Below)** Accurate mass isotopic envelope of feature 8, as specified in Table 1.



### D. Mass Spectral Data for Selected Features

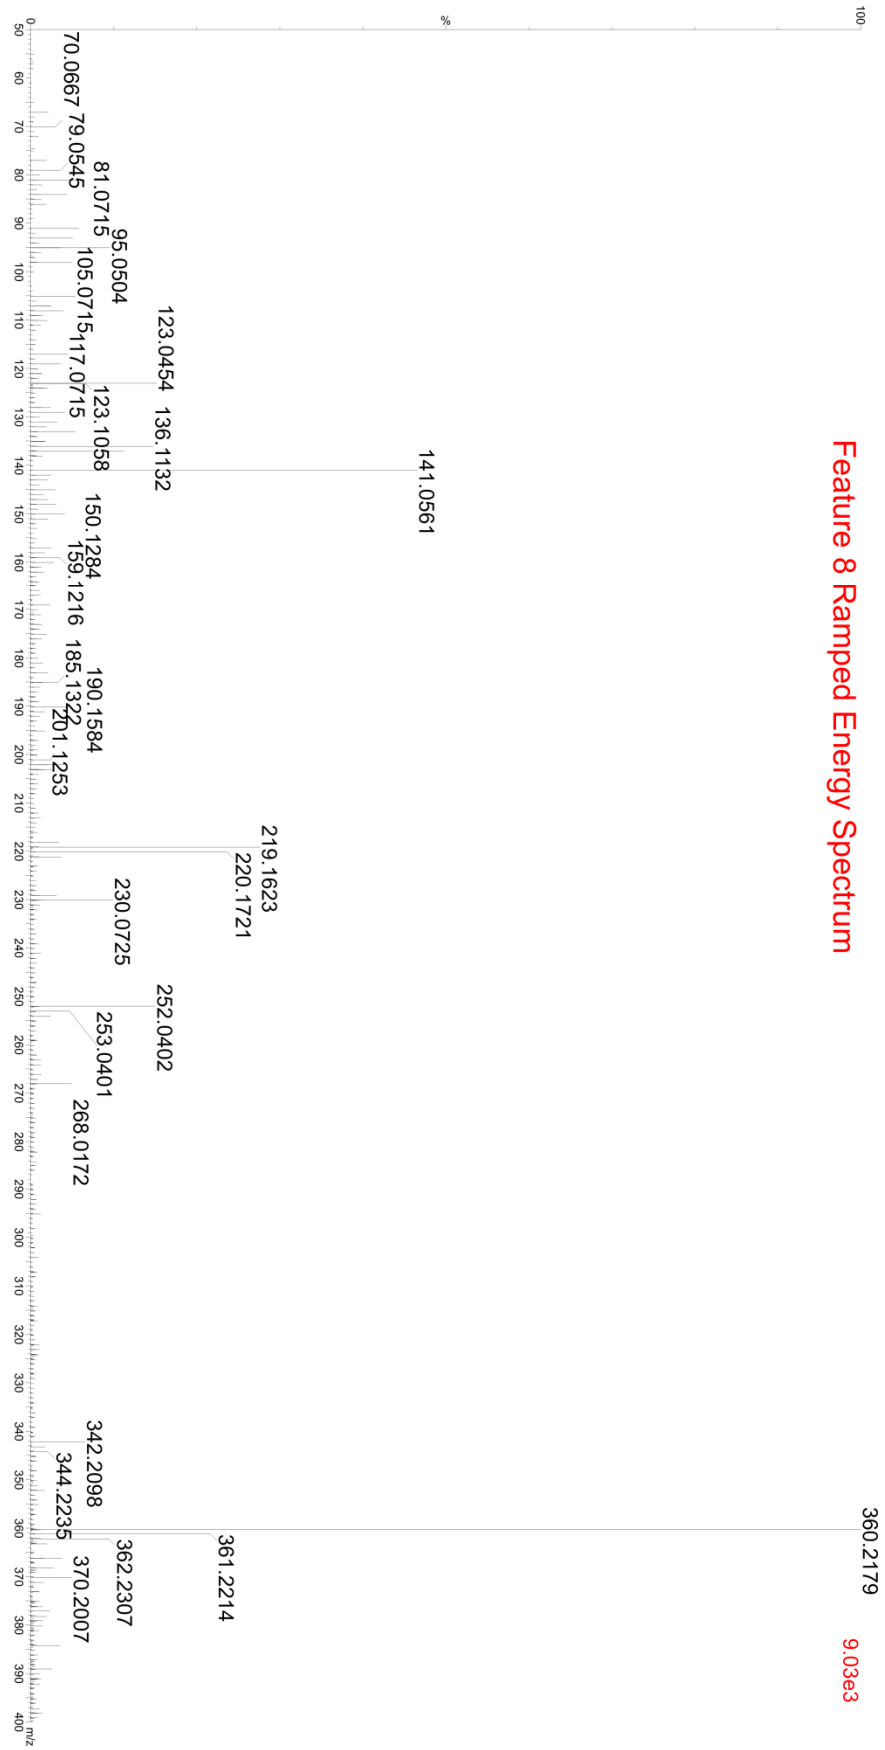

**Figure S44.** Mobility separated ramped energy mass spectrum for feature 8.

## D. Mass Spectral Data for Selected Features

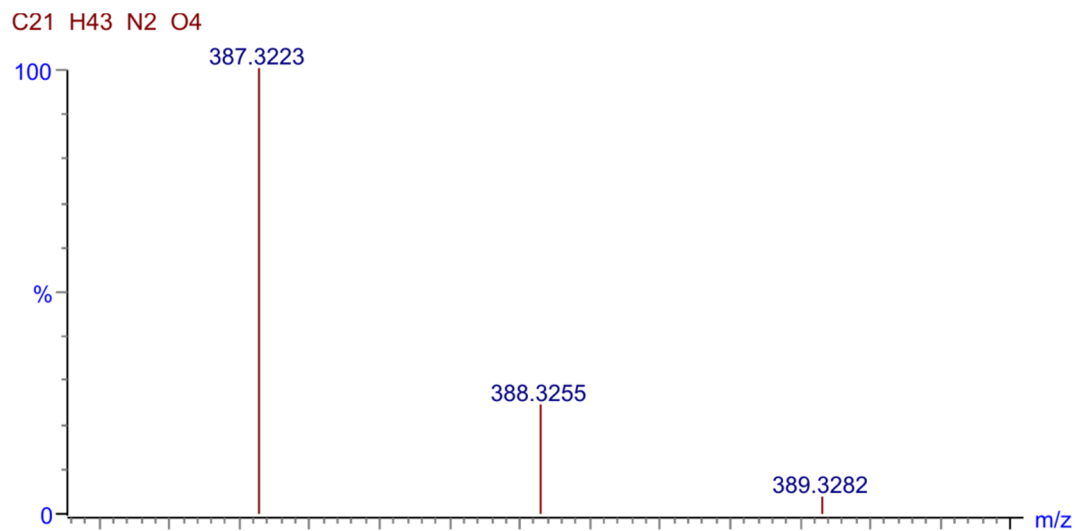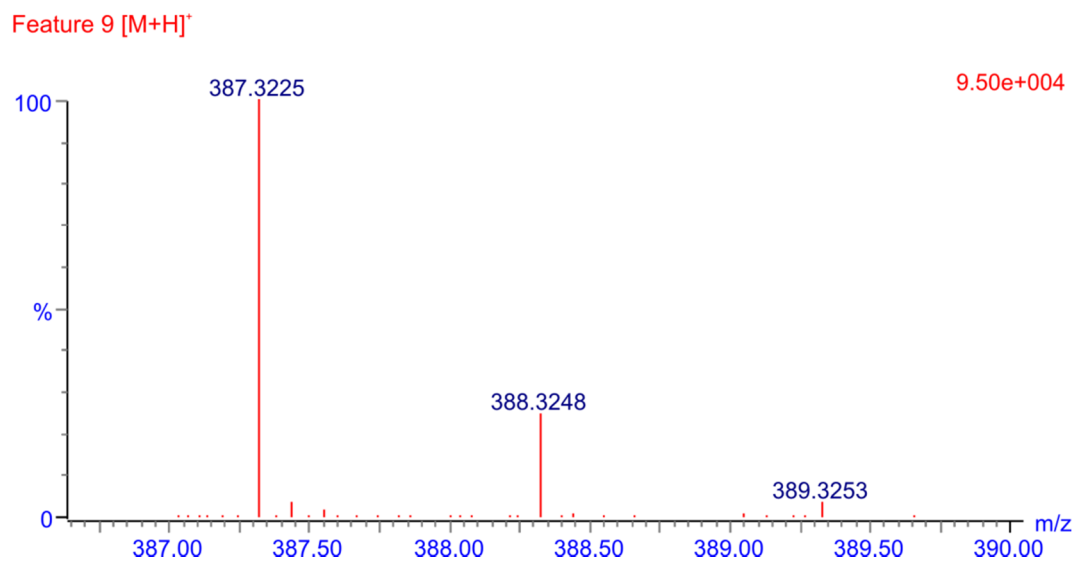

**Figure S45. (Above)** Theoretical isotopic profile for  $[C_{21}H_{42}N_2O_4+H]^+$ . **(Below)** Accurate mass isotopic envelope of feature 9, as specified in Table 1.

# Feature 9 ramped energy spectrum

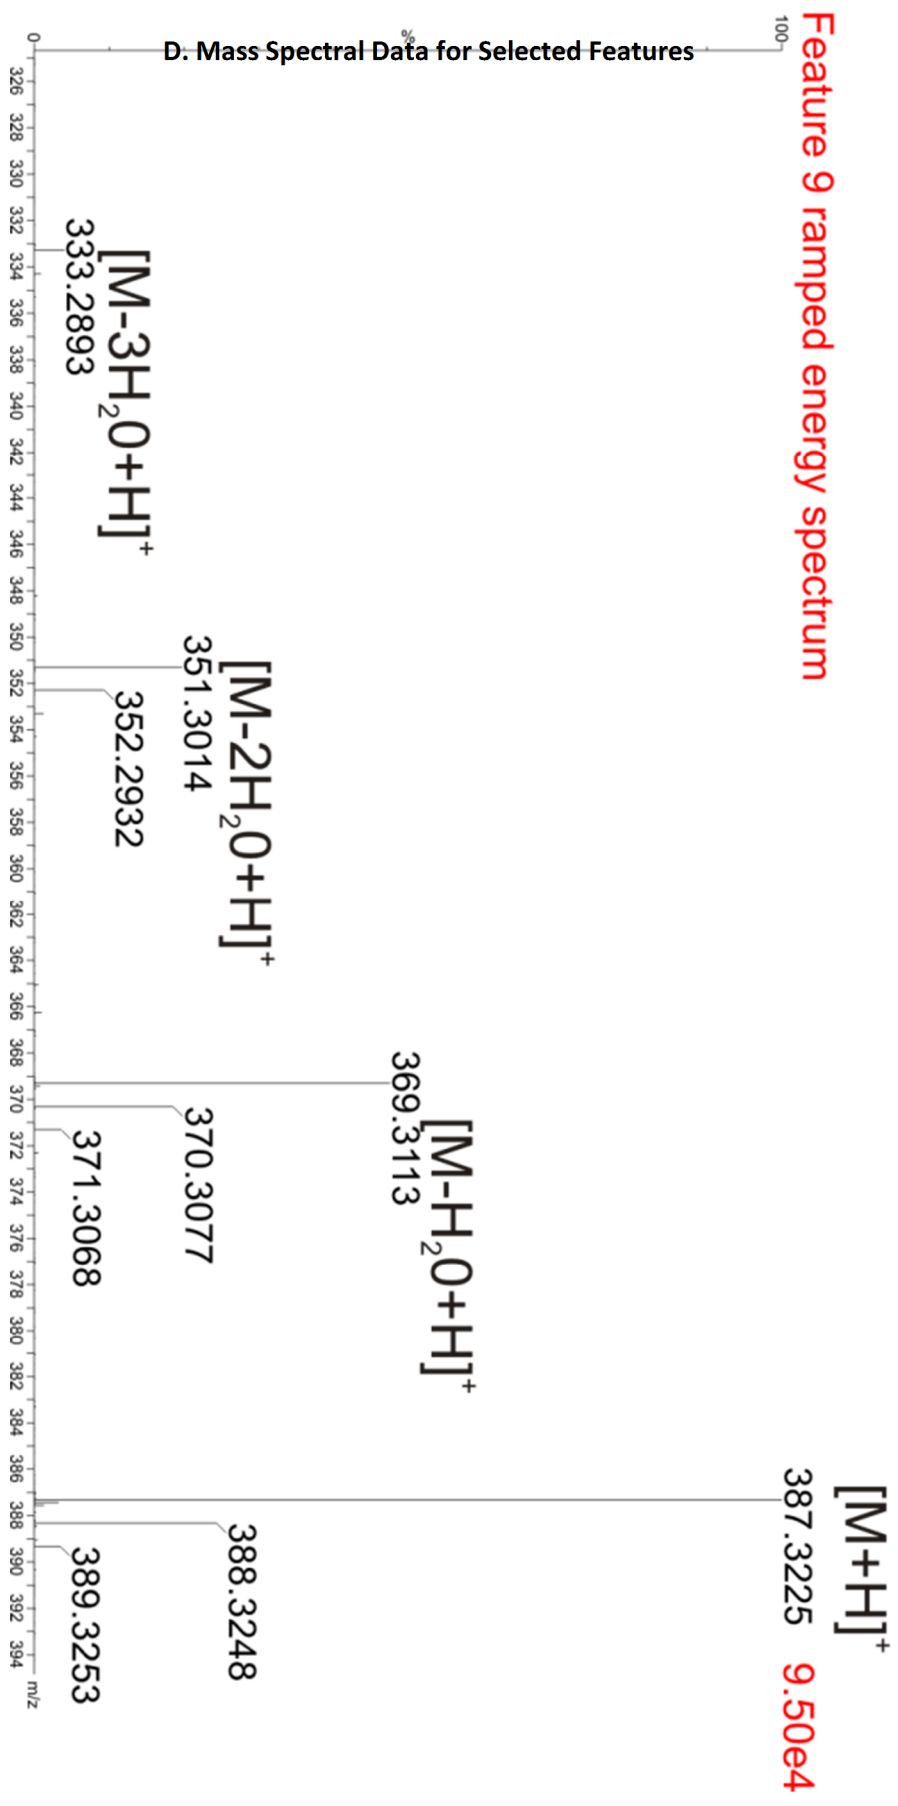

**Figure S46.** Mobility separated ramped energy mass spectrum for feature 9, indicating neutral losses. These neutral losses corroborate the chemical formula determination.

## D. Mass Spectral Data for Selected Features

### D. Mass Spectral Data for Selected Features

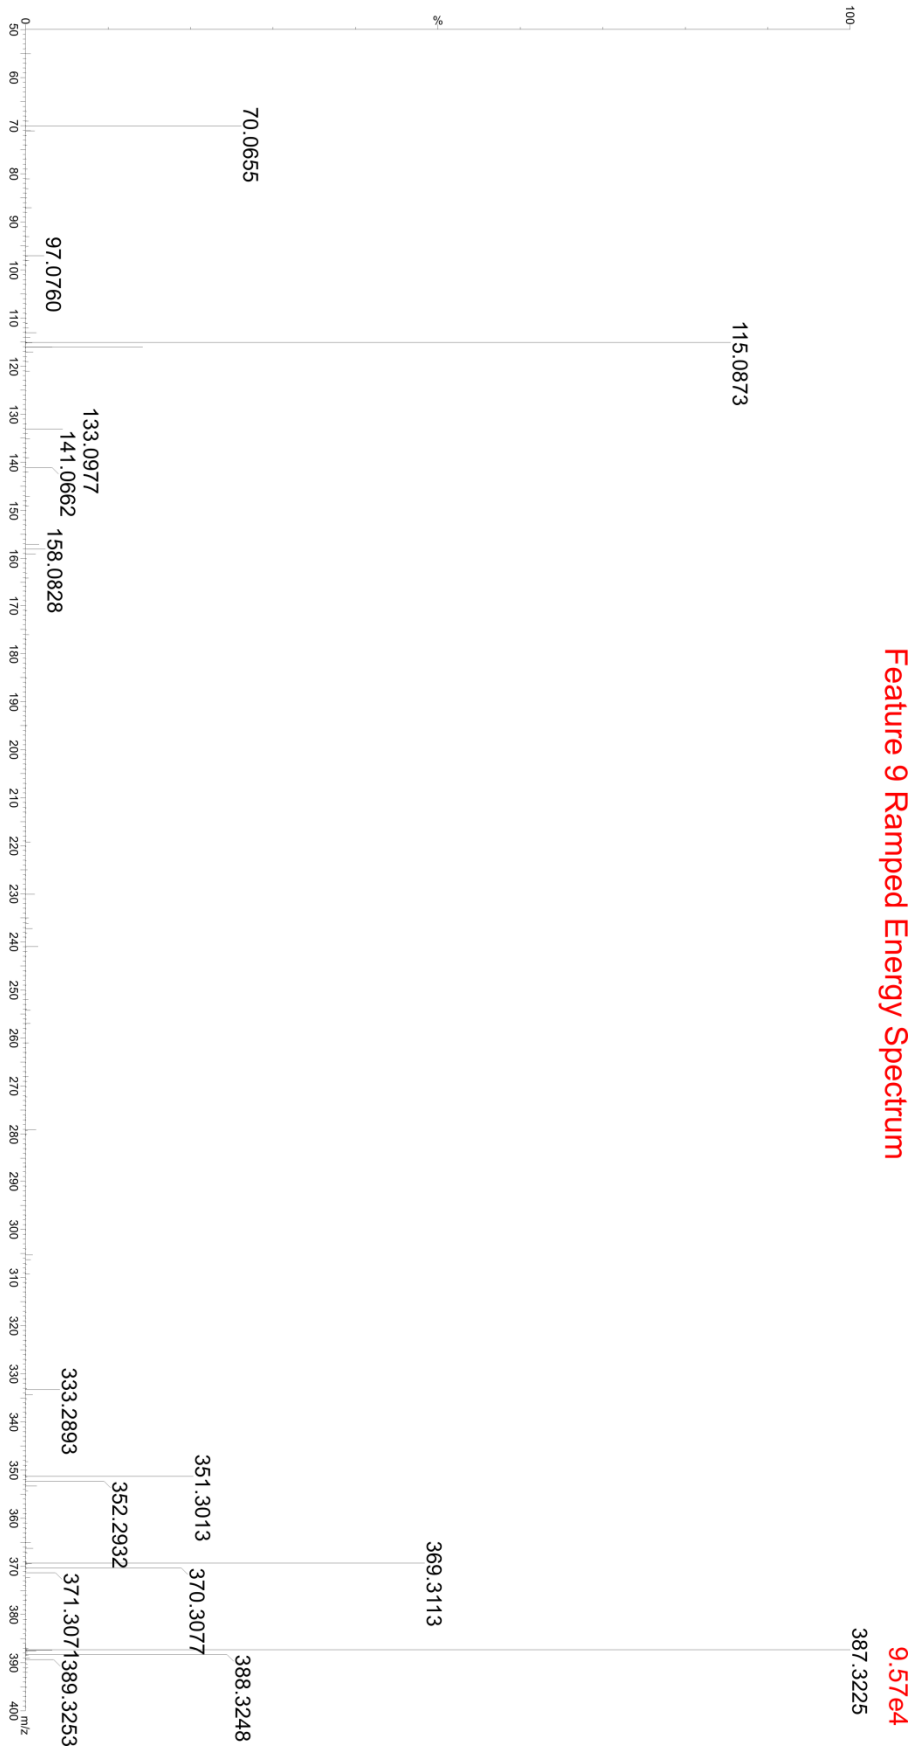

Figure S47. Mobility separated ramped energy mass spectrum for feature 9.

### D. Mass Spectral Data for Selected Features

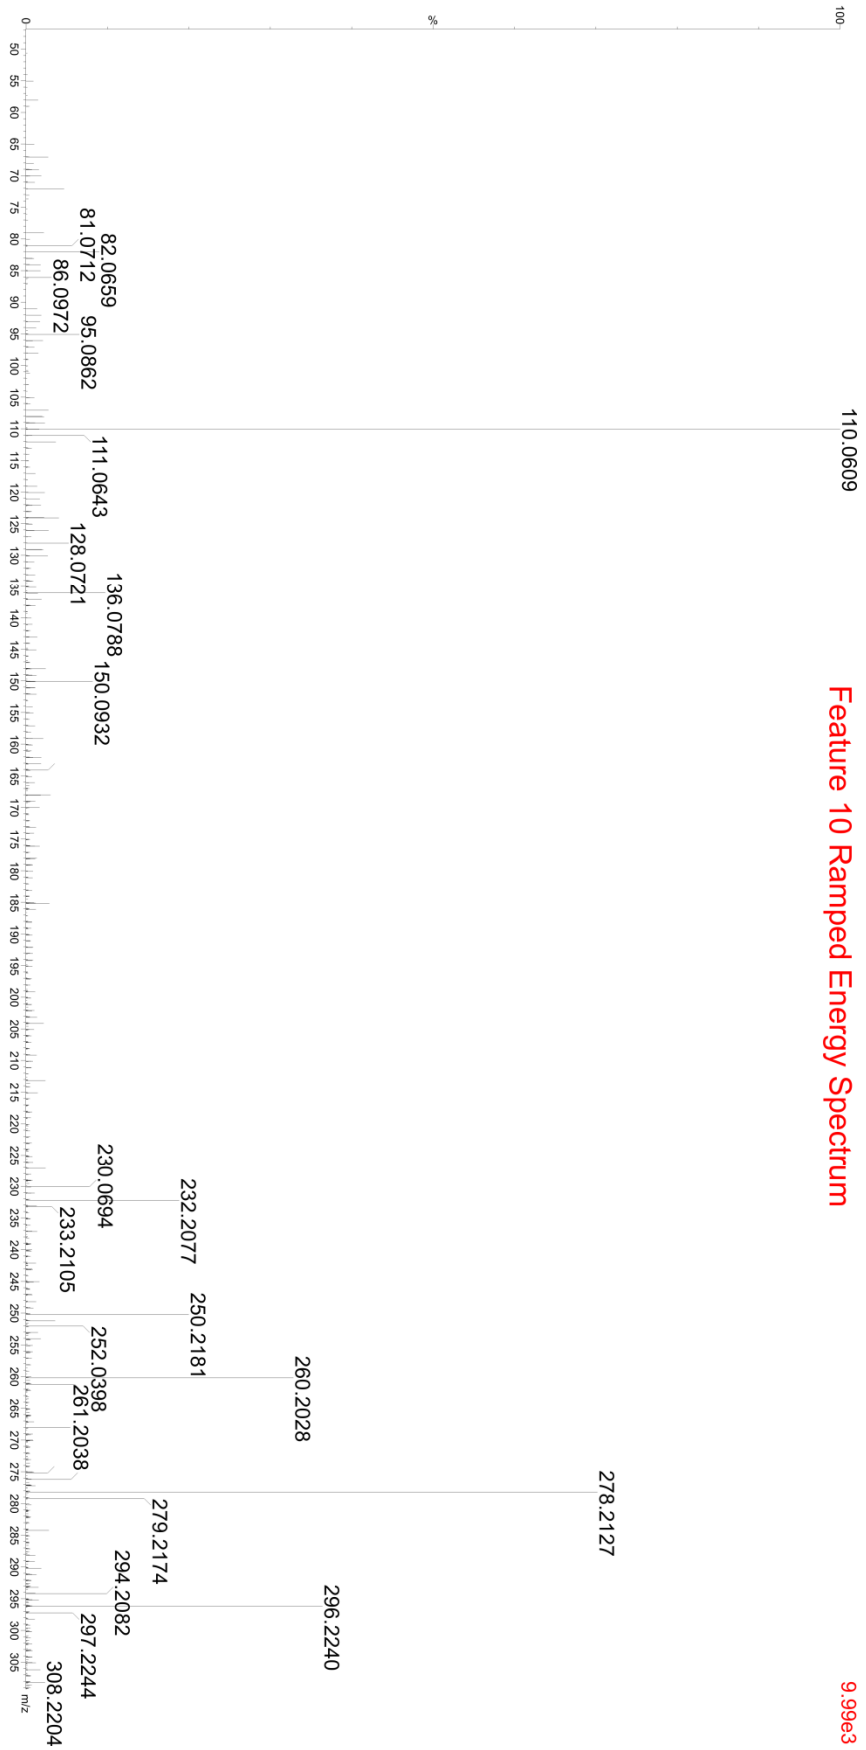

Figure S48. Mobility separated ramped energy mass spectrum for feature 10.

D. Mass Spectral Data for Selected Features

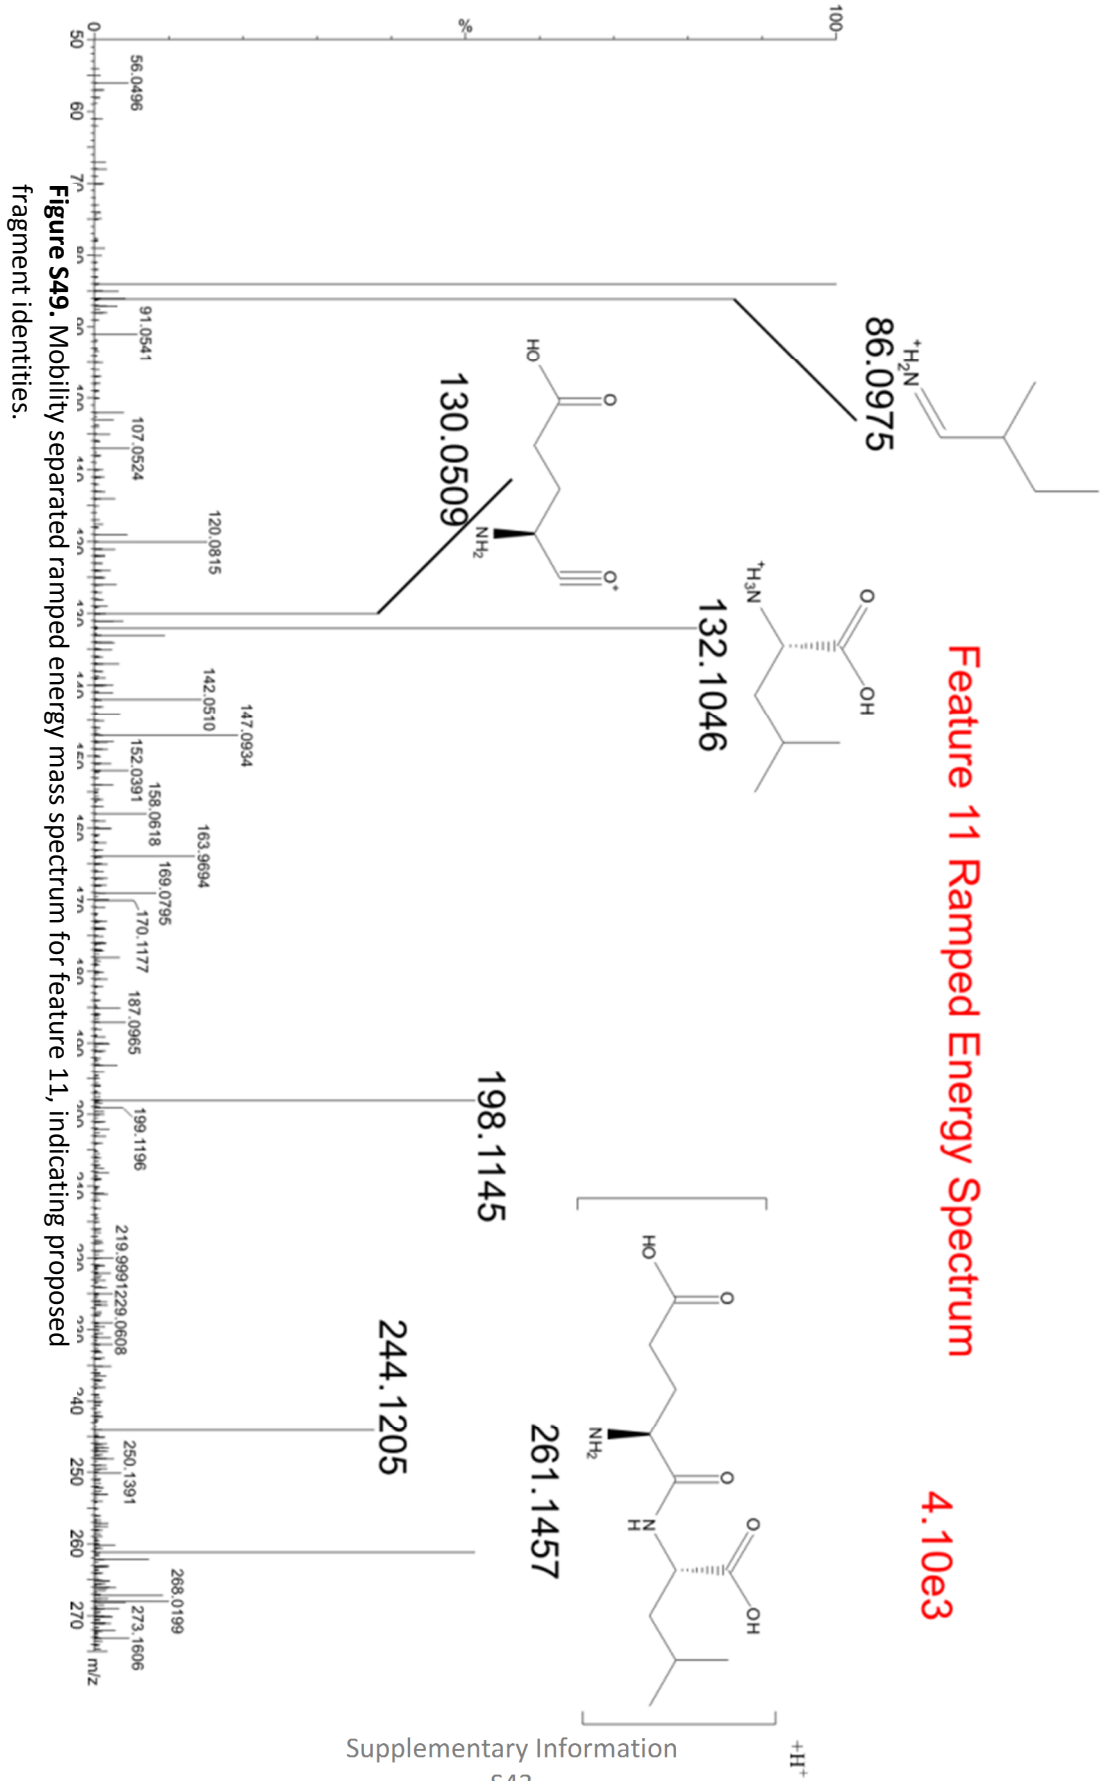

## D. Mass Spectral Data for Selected Features

C<sub>16</sub> H<sub>25</sub> O<sub>5</sub>

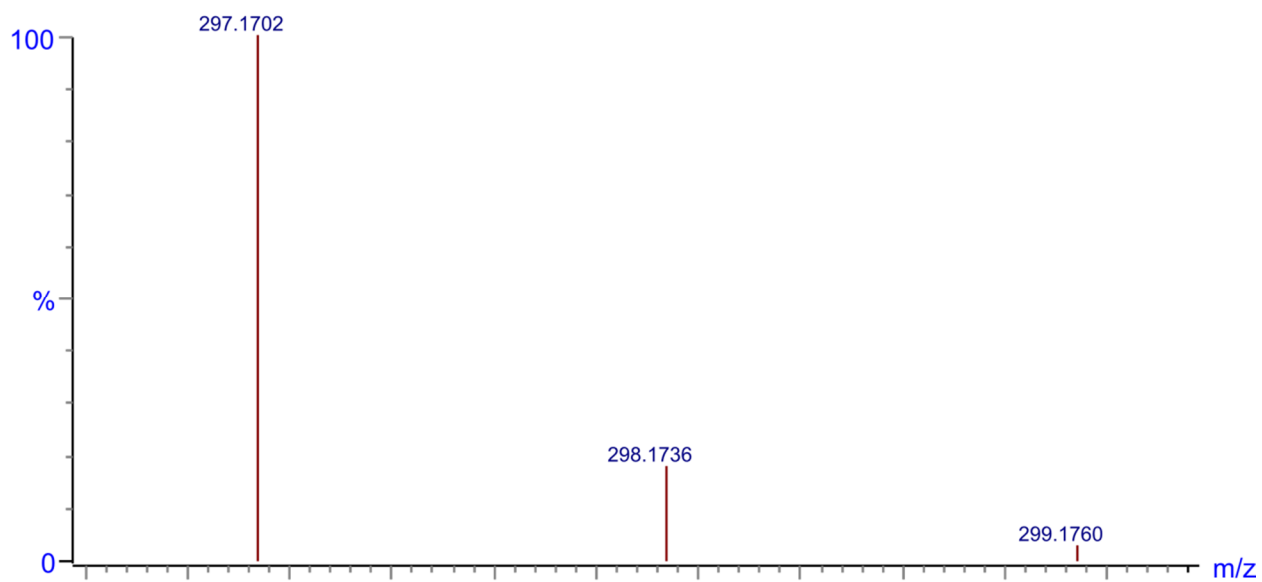

Feature 12 [M+H]<sup>+</sup>

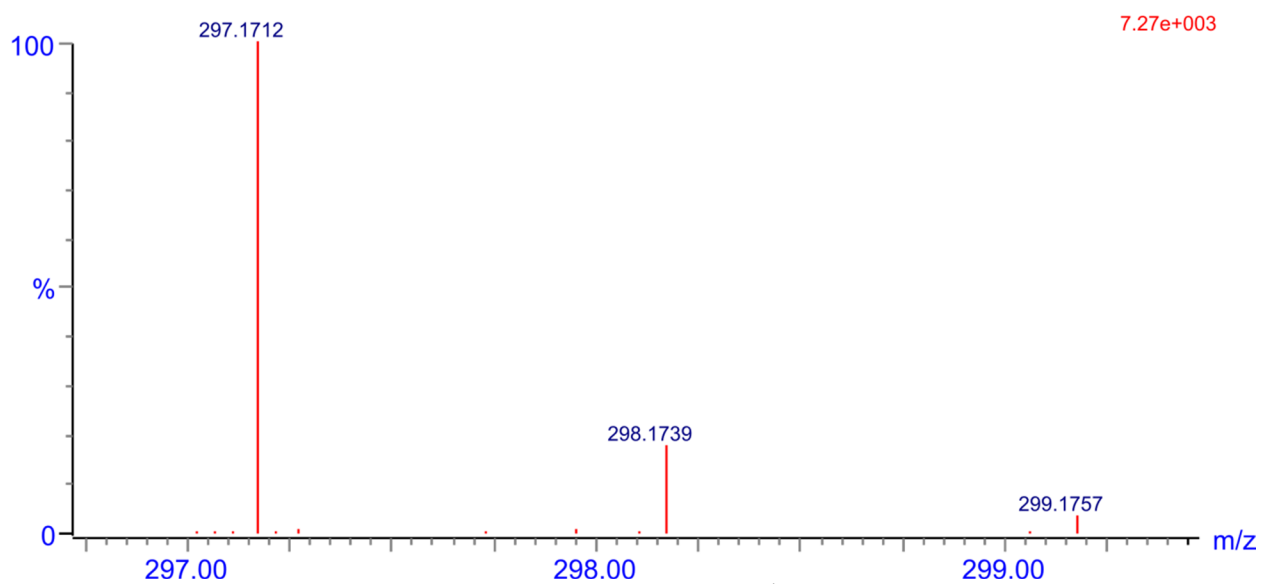

**Figure S50. (Above)** Theoretical isotopic profile for [C<sub>16</sub>H<sub>24</sub>O<sub>5</sub>+H]<sup>+</sup>. **(Below)** Accurate mass isotopic envelope of feature 12, as specified in Table 1.



## D. Mass Spectral Data for Selected Features

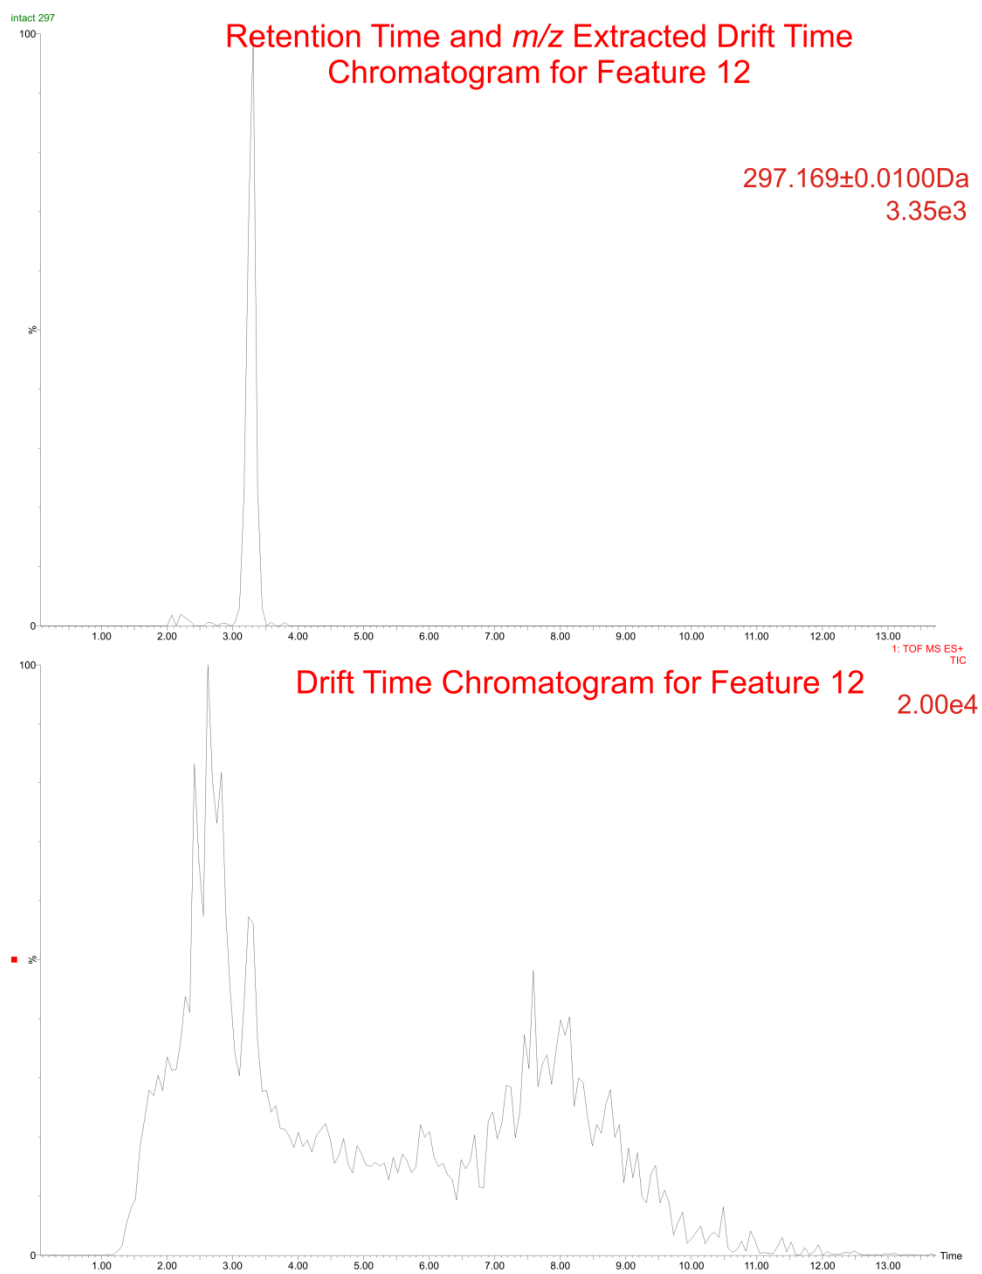

**Figure S51.** Retention time selected drift time chromatograms and extracted drift time ion chromatogram for feature 12. This drift time was used to select the proper drift time for high energy data interrogation.

### D. Mass Spectral Data for Selected Features

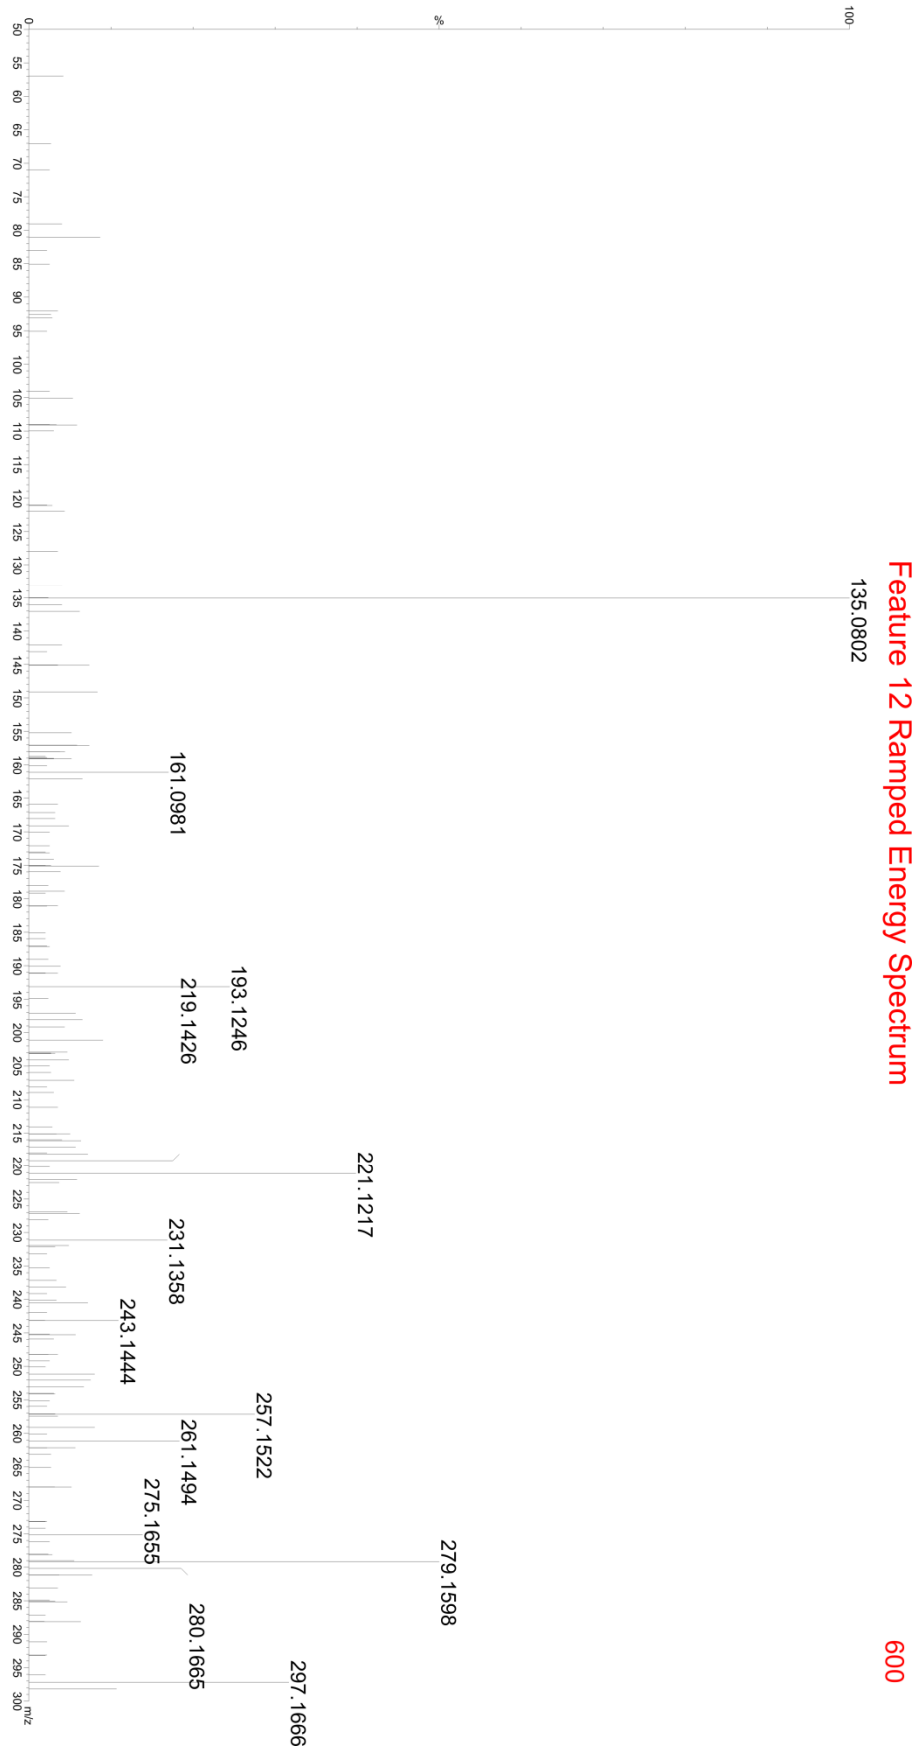

Figure S52. Mobility separated ramped energy mass spectrum for feature 12.

## D. Mass Spectral Data for Selected Features

Feature 13 Ramped Energy Spectrum

4.03e4

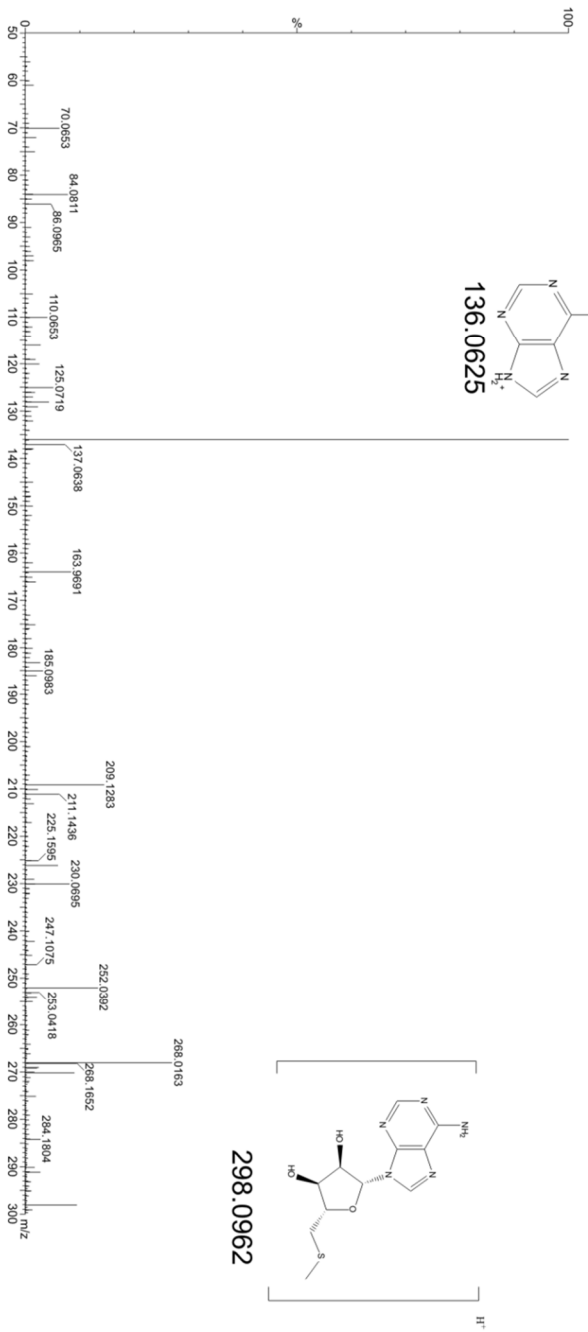

Feature 13 MS<sup>3</sup> for m/z 136

3.08e3

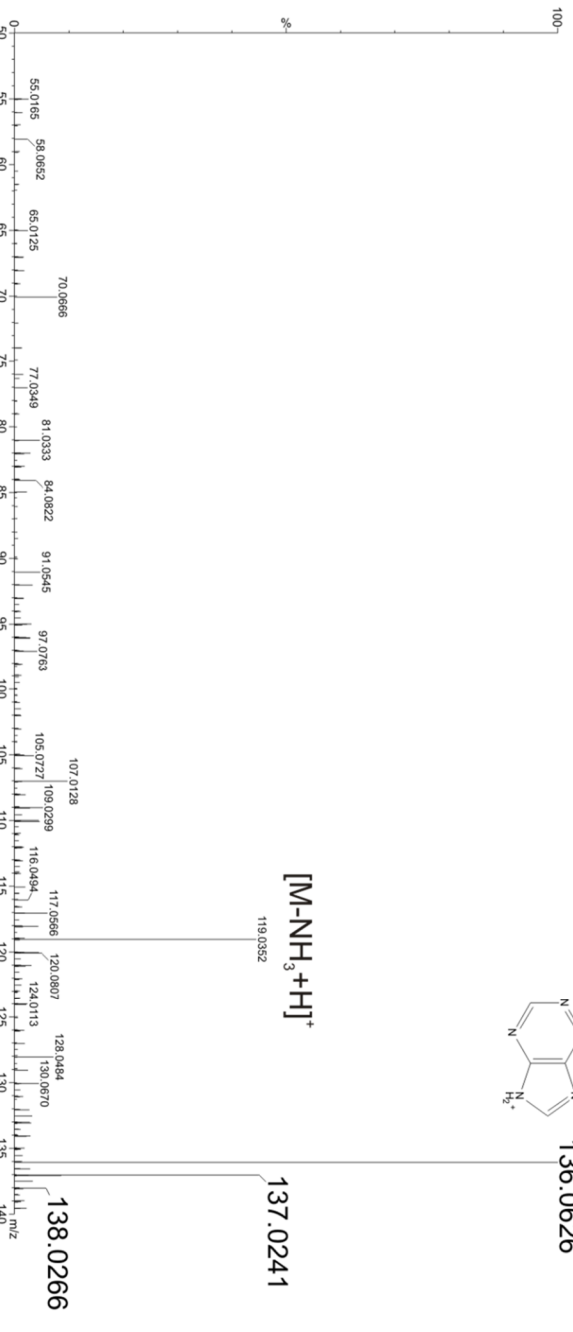

**Figure S53.** (Above) Mobility separated ramped energy mass spectrum for feature 13, indicating proposed fragment identities. (Bottom) Mobility separated MS<sup>3</sup> of product ion 136.0626. These fragments further corroborate identification.

### D. Mass Spectral Data for Selected Features

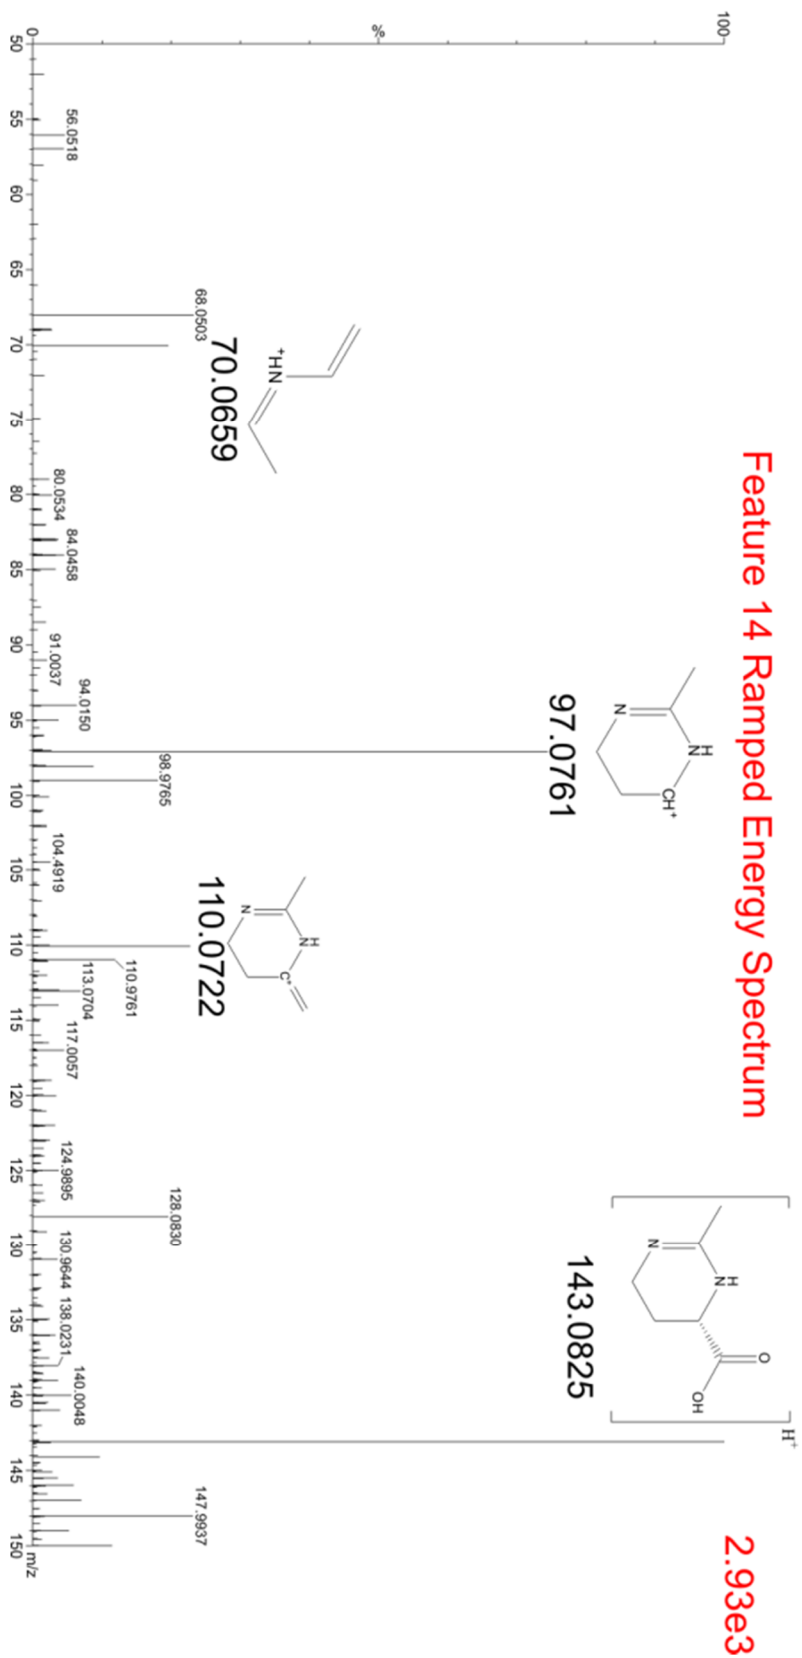

**Figure S54. (Above)** Mobility separated ramped energy mass spectrum for feature 14, indicating proposed fragment identities.

### D. Mass Spectral Data for Selected Features

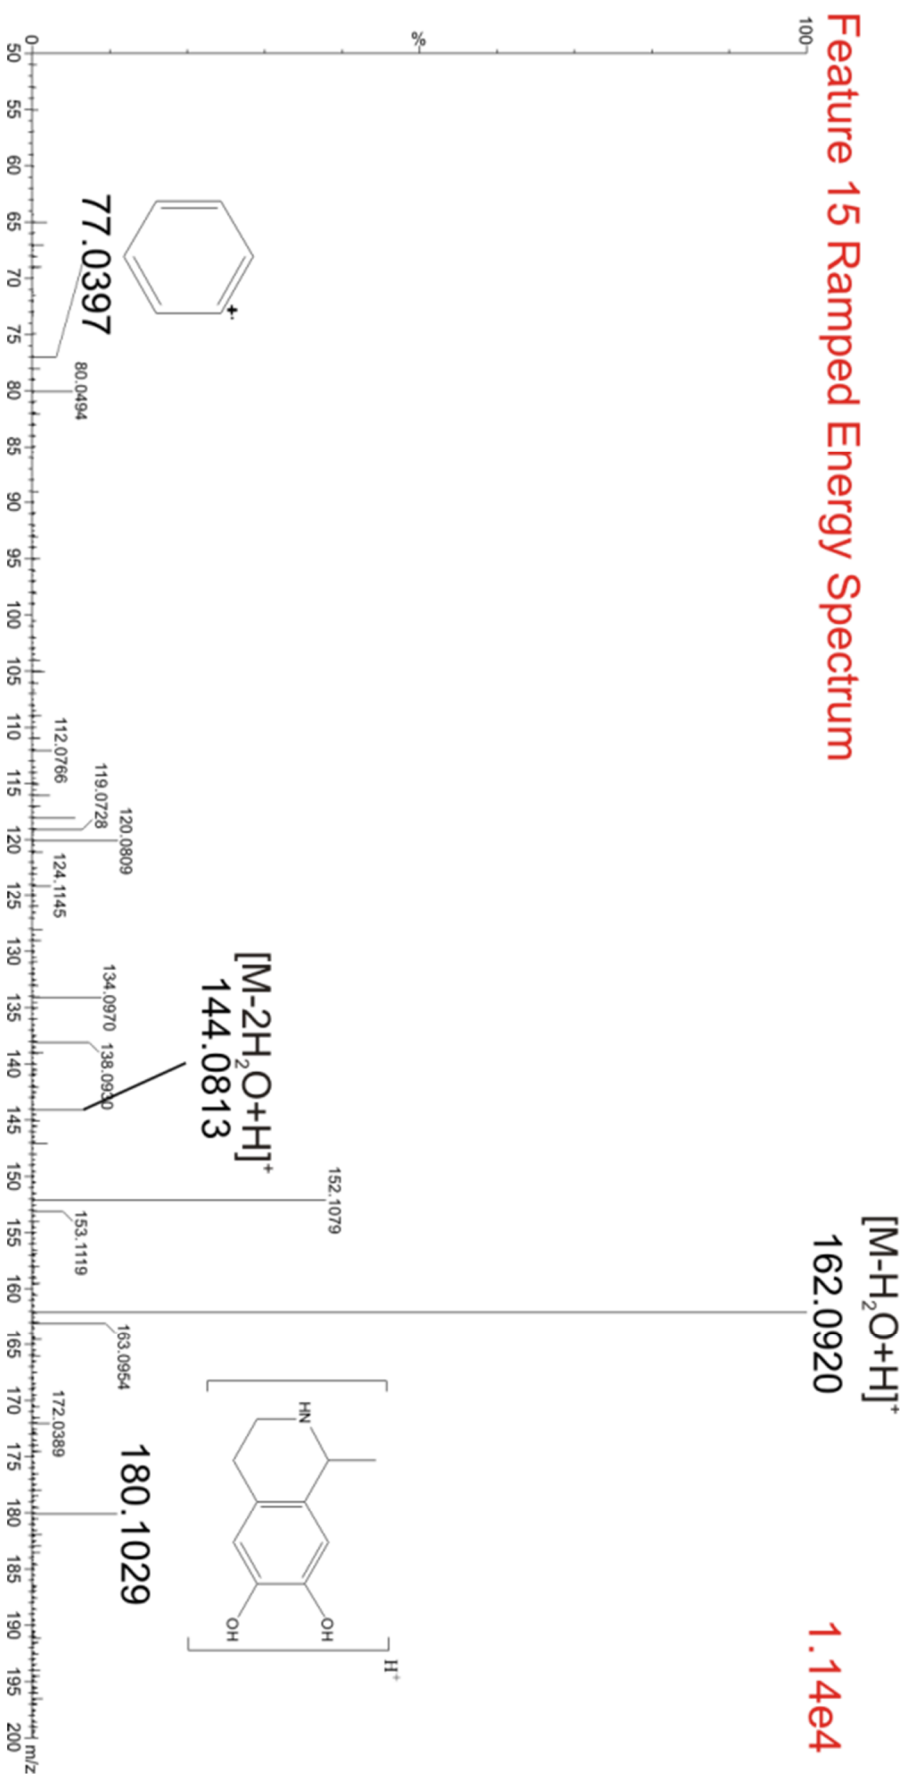

**Figure S55. (Above)** Mobility separated ramped energy mass spectrum for feature 15, indicating proposed fragment identities. Feature 15 is the result of the in-source neutral loss of water.

## D. Mass Spectral Data for Selected Features

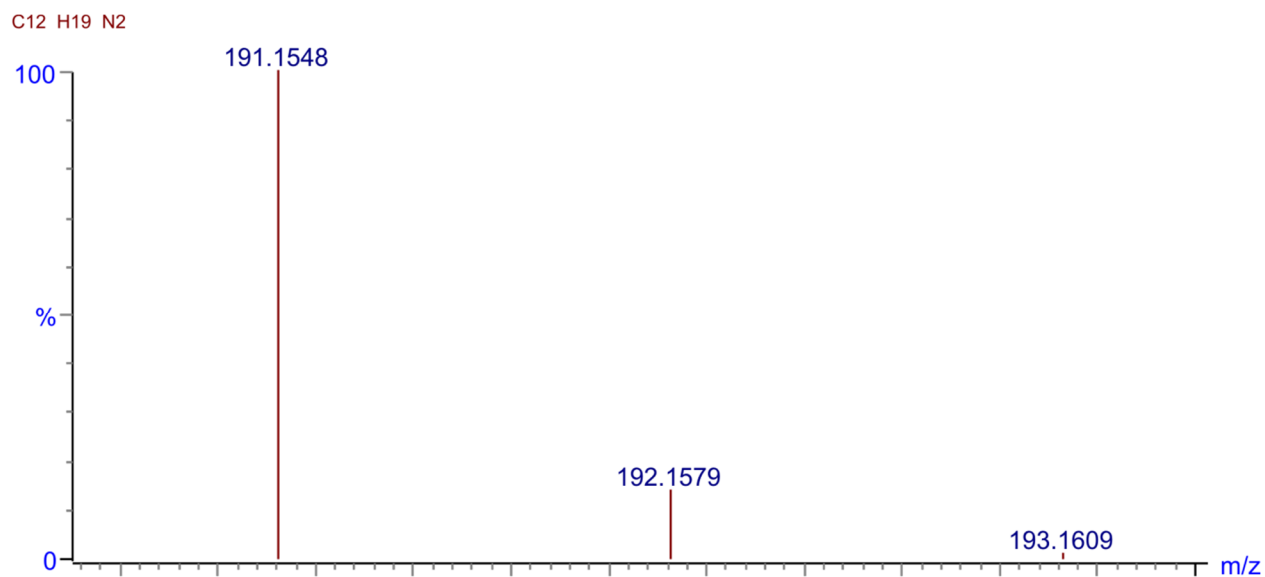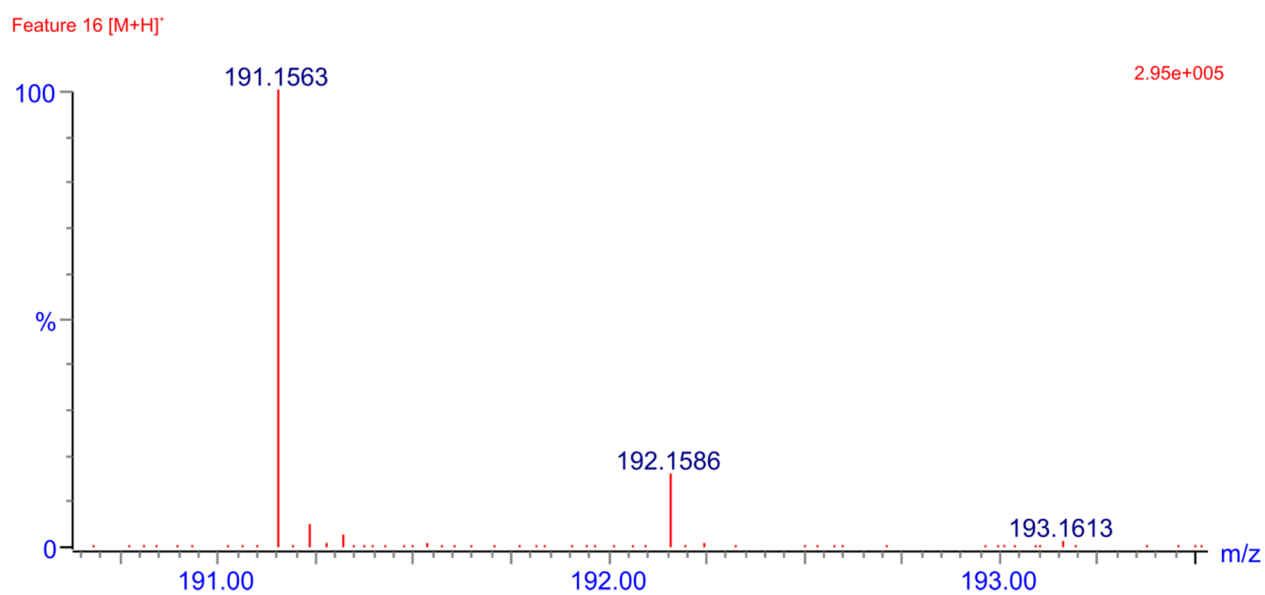

**Figure S56. (Above)** Theoretical isotopic profile for  $[C_{12}H_{18}N_2+H]^+$ . **(Below)** Accurate mass isotopic envelope of feature 16, as specified in Table 1.

### D. Mass Spectral Data for Selected Features

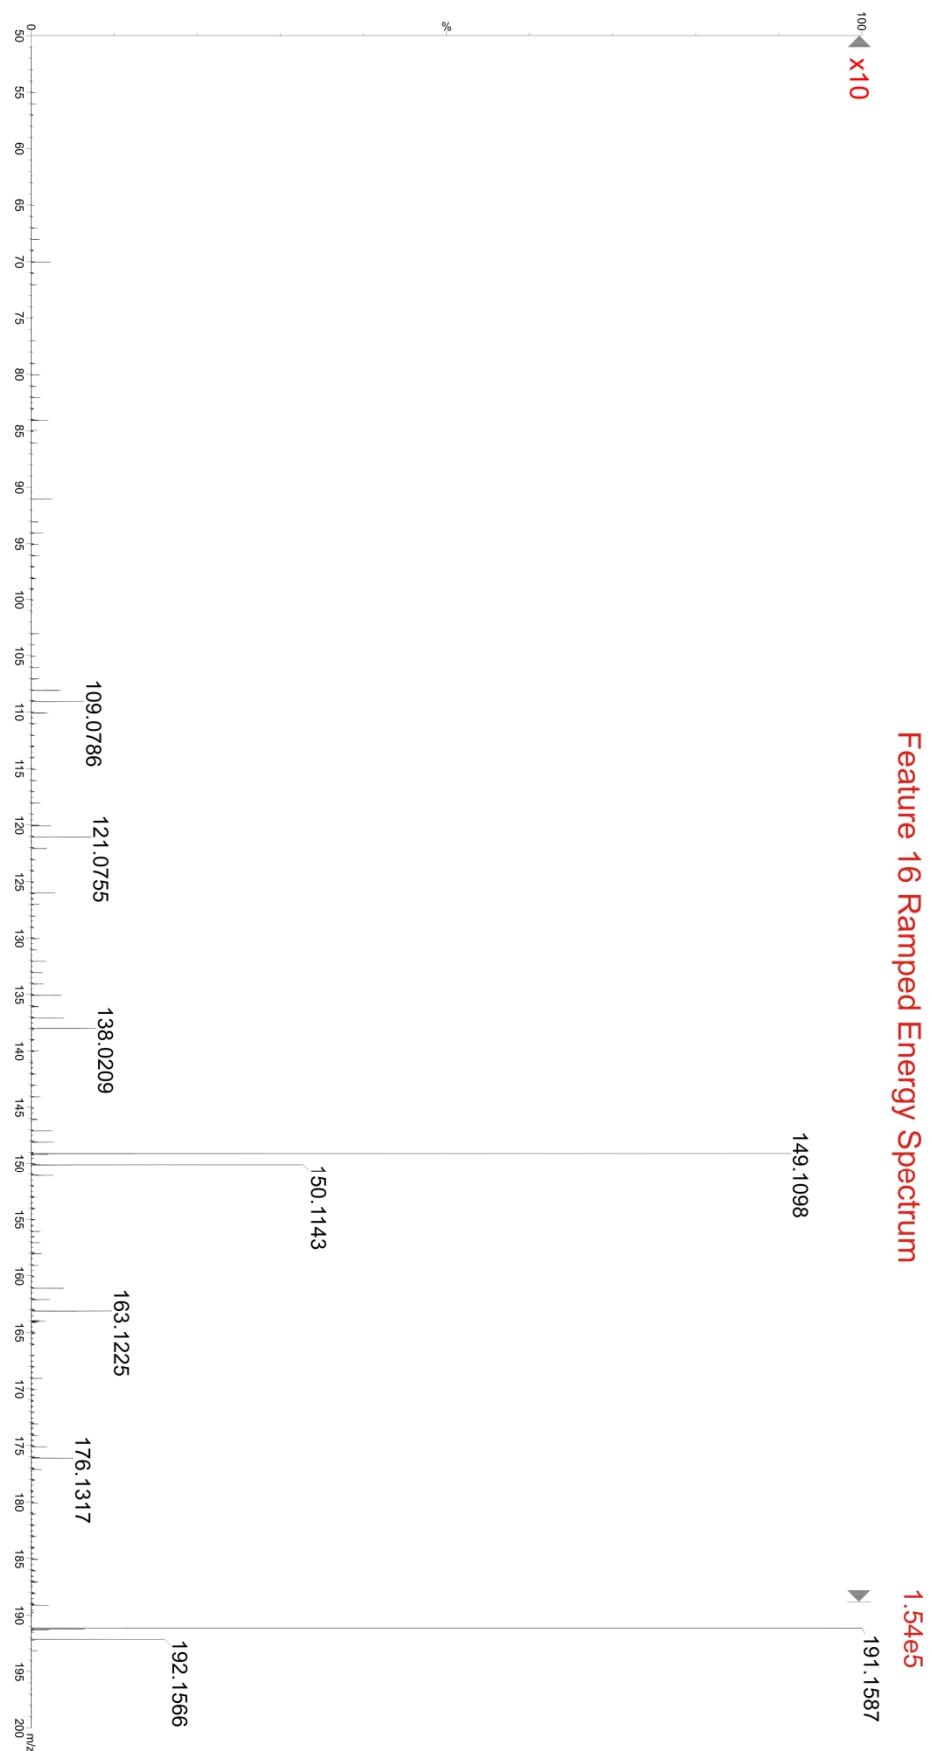

Figure S57. Mobility separated ramped energy mass spectrum for feature 16. The region from 50-190Da is magnified 10x.

## D. Mass Spectral Data for Selected Features

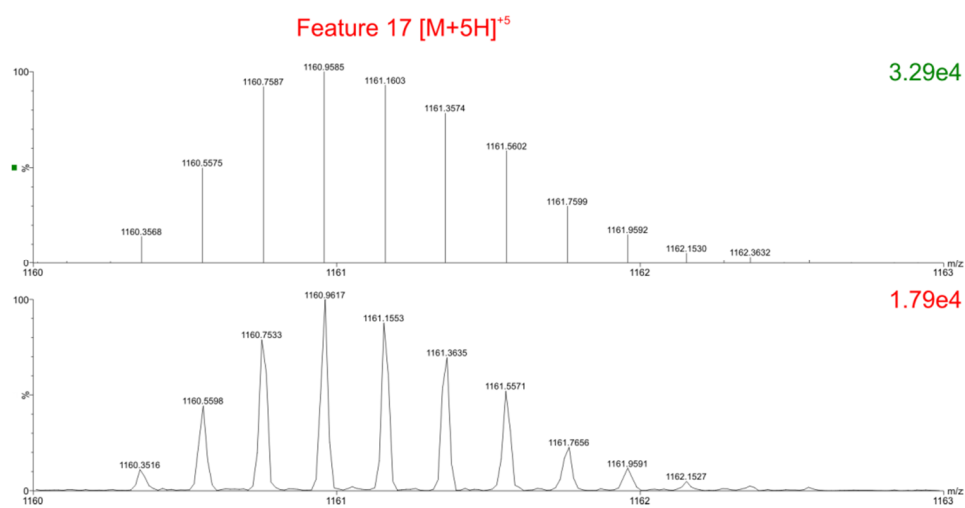

**Figure S58. (Above)** Centroided accurate mass isotopic envelope for feature 17. **(Below)** Continuum accurate mass isotopic envelope of feature 17, as specified in Table 1.



### D. Mass Spectral Data for Selected Features

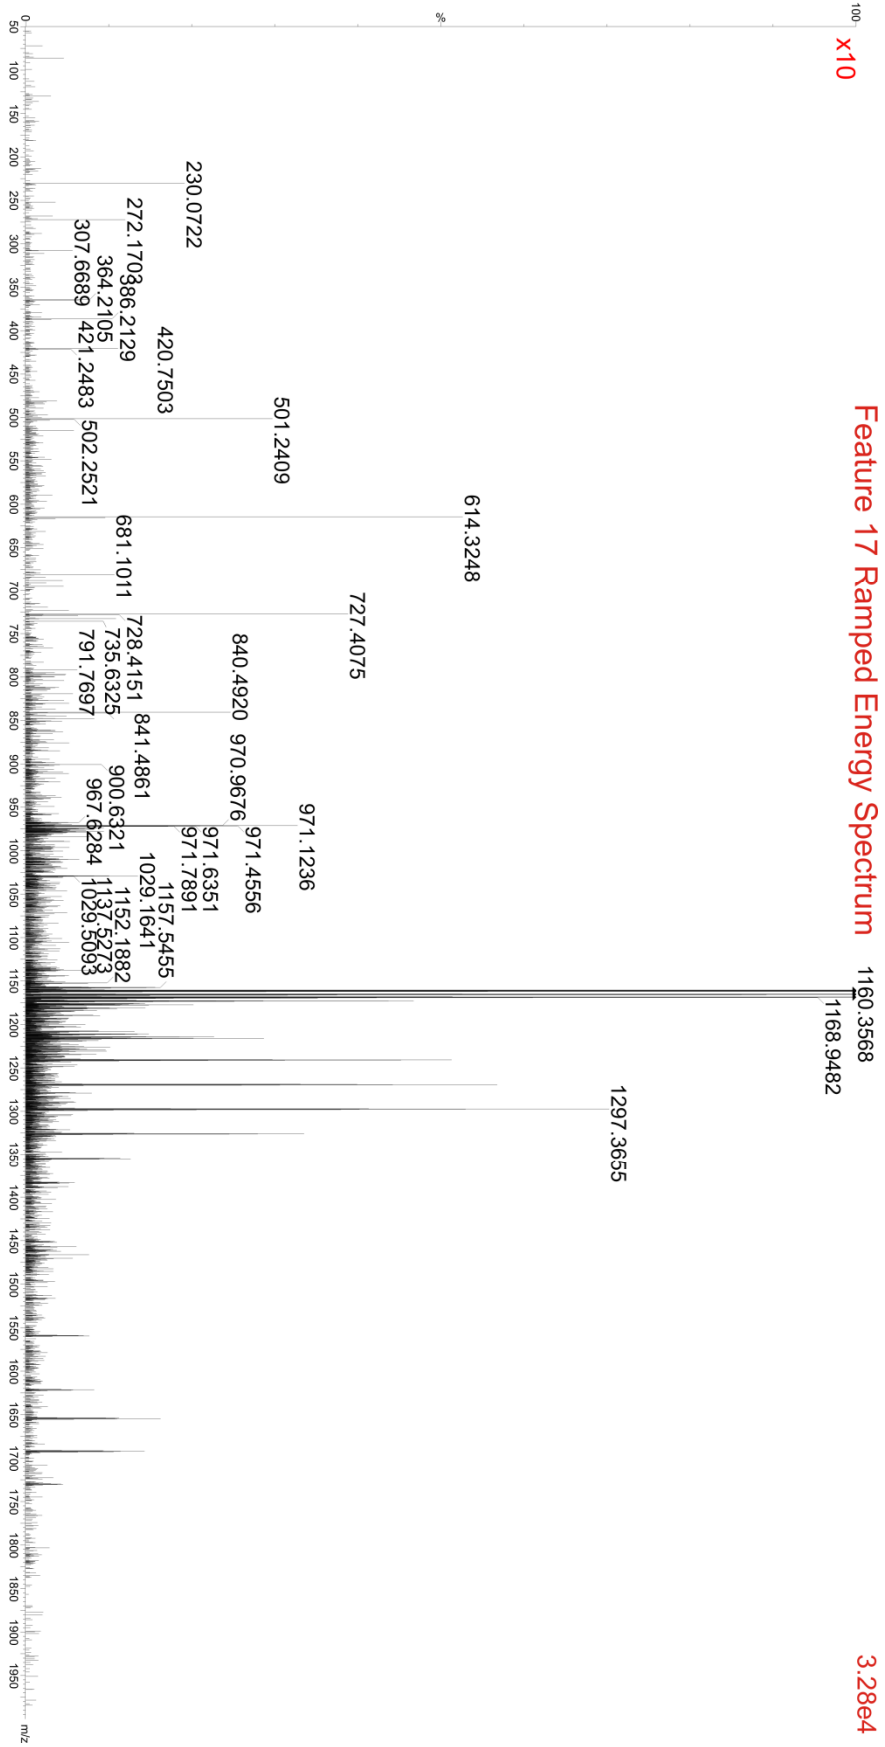

Figure S59. Mobility separated ramped energy mass spectrum for feature 17. Spectrum is magnified 10x.

# Feature 18 Ramped Energy Spectrum

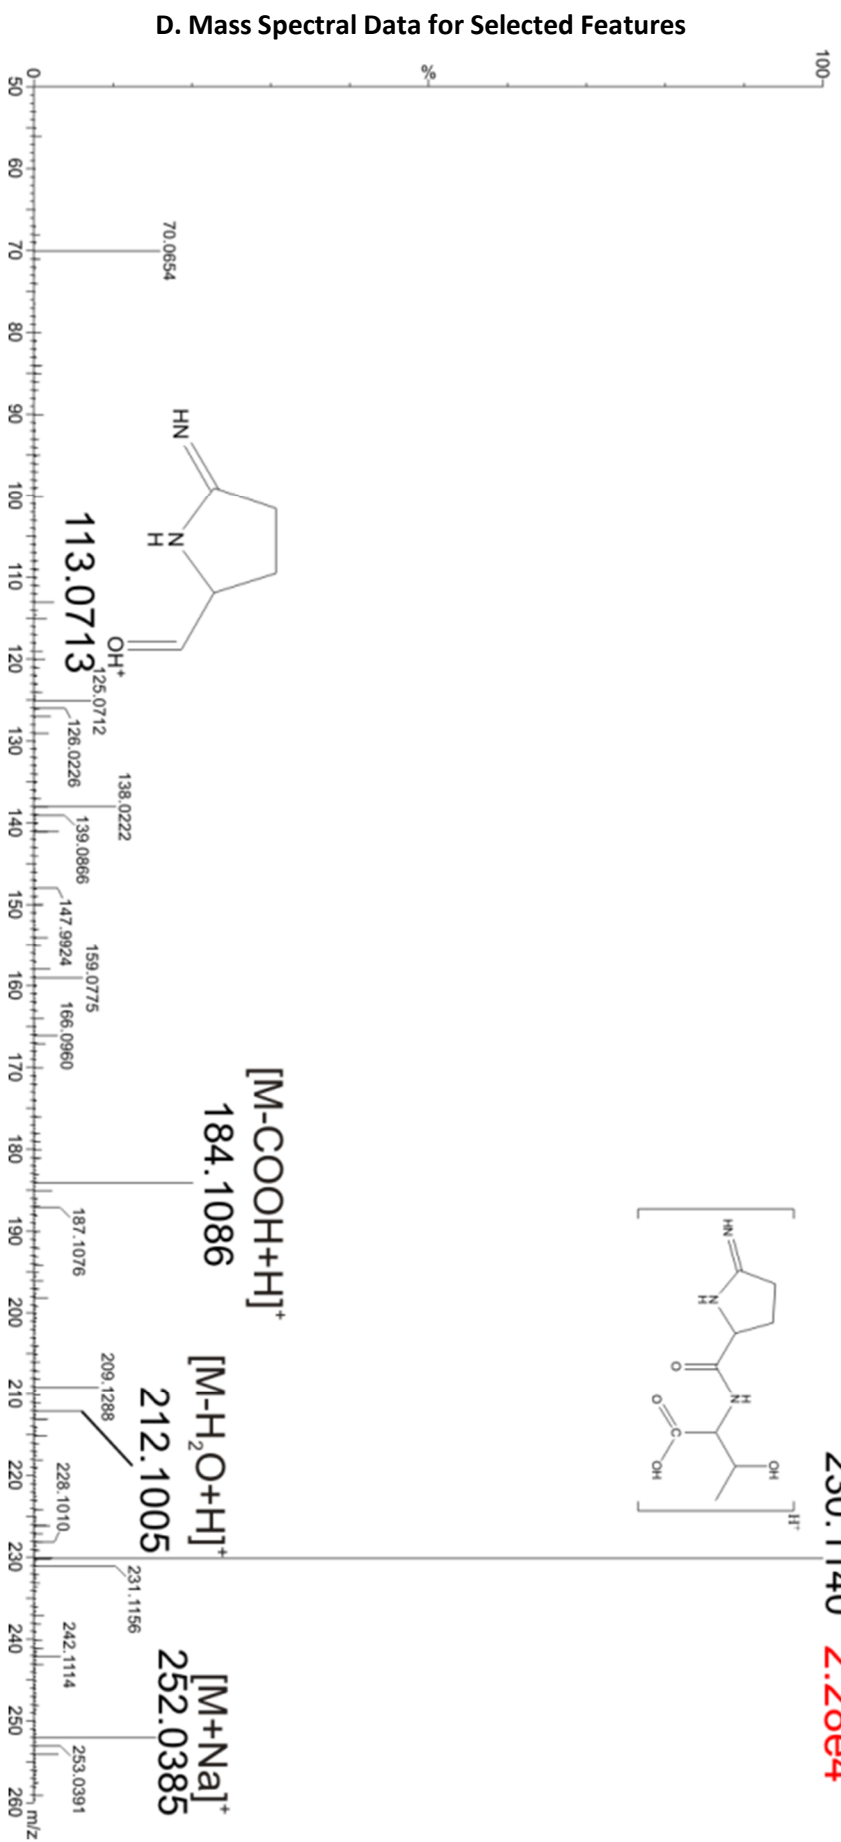

Figure S60. (Above) Mobility separated ramped energy mass spectrum for feature 18, indicating proposed fragment identities.

#### D. Mass Spectral Data for Selected Features

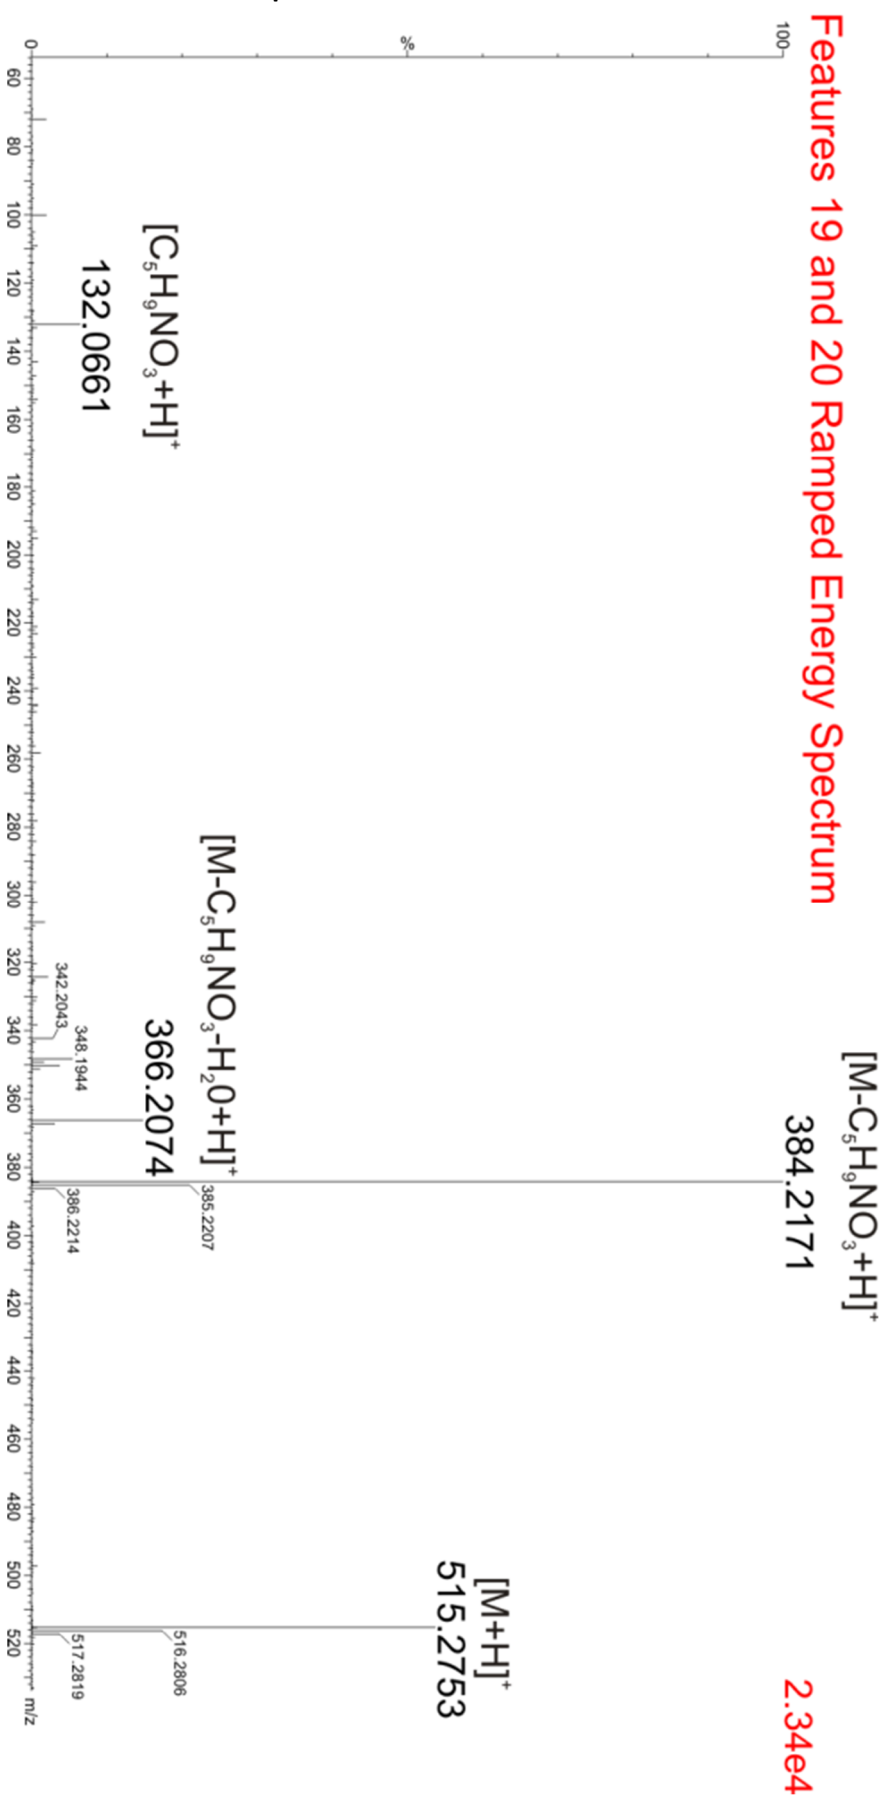

Figure S61. (Above) Mobility separated ramped energy mass spectrum for feature 18 and 19, indicating proposed fragment identities.

## Feature 21 Ramped Energy Spectrum

9.03e3

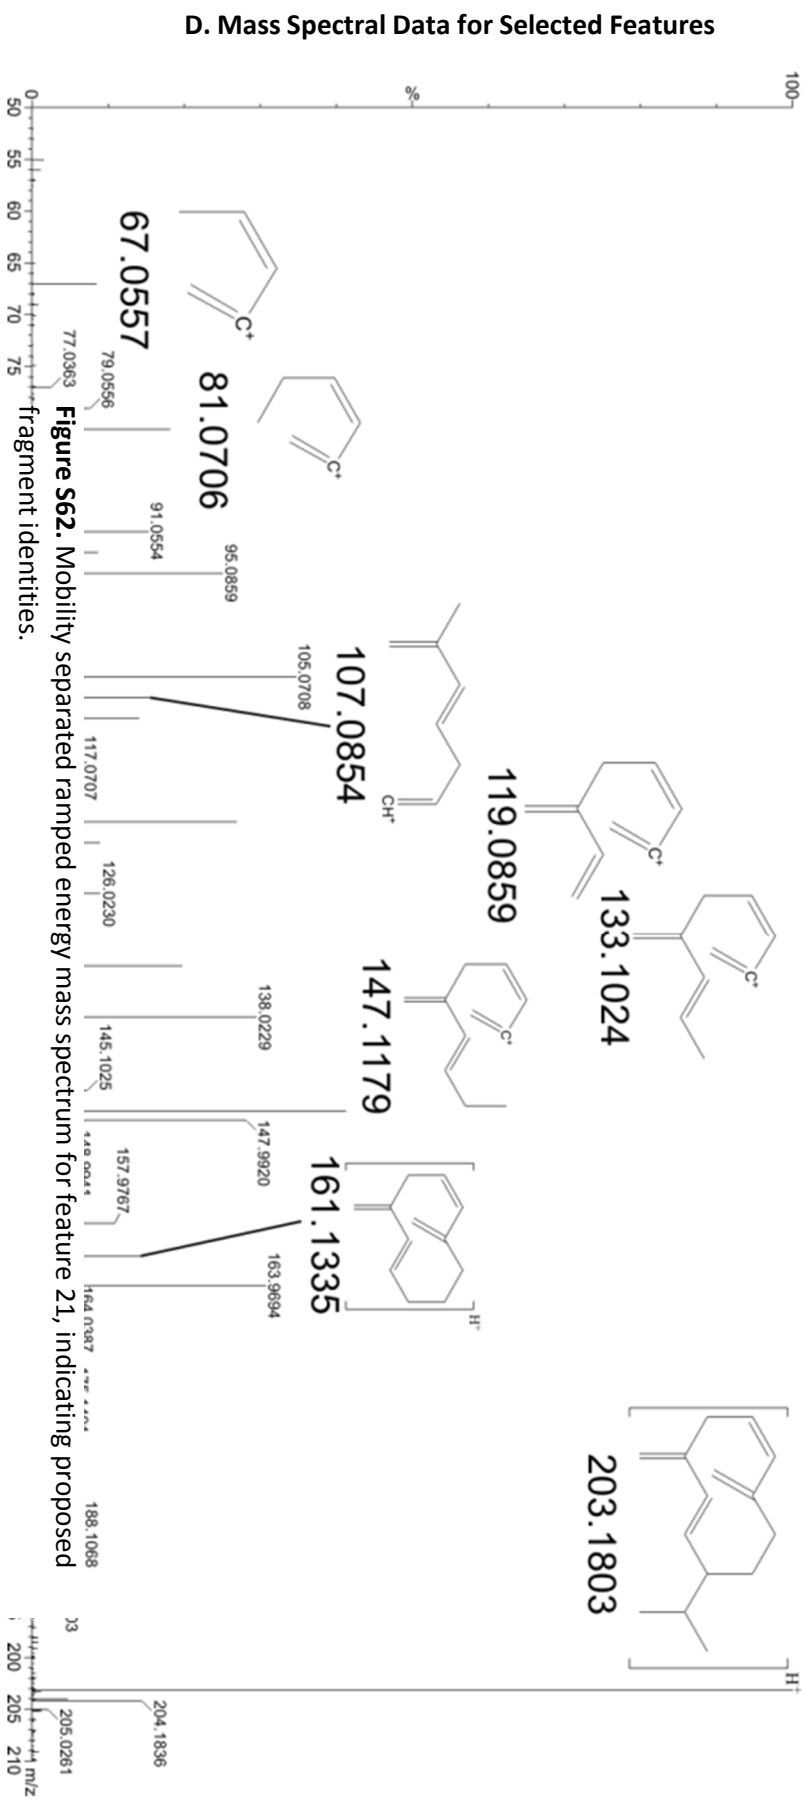

### D. Mass Spectral Data for Selected Features

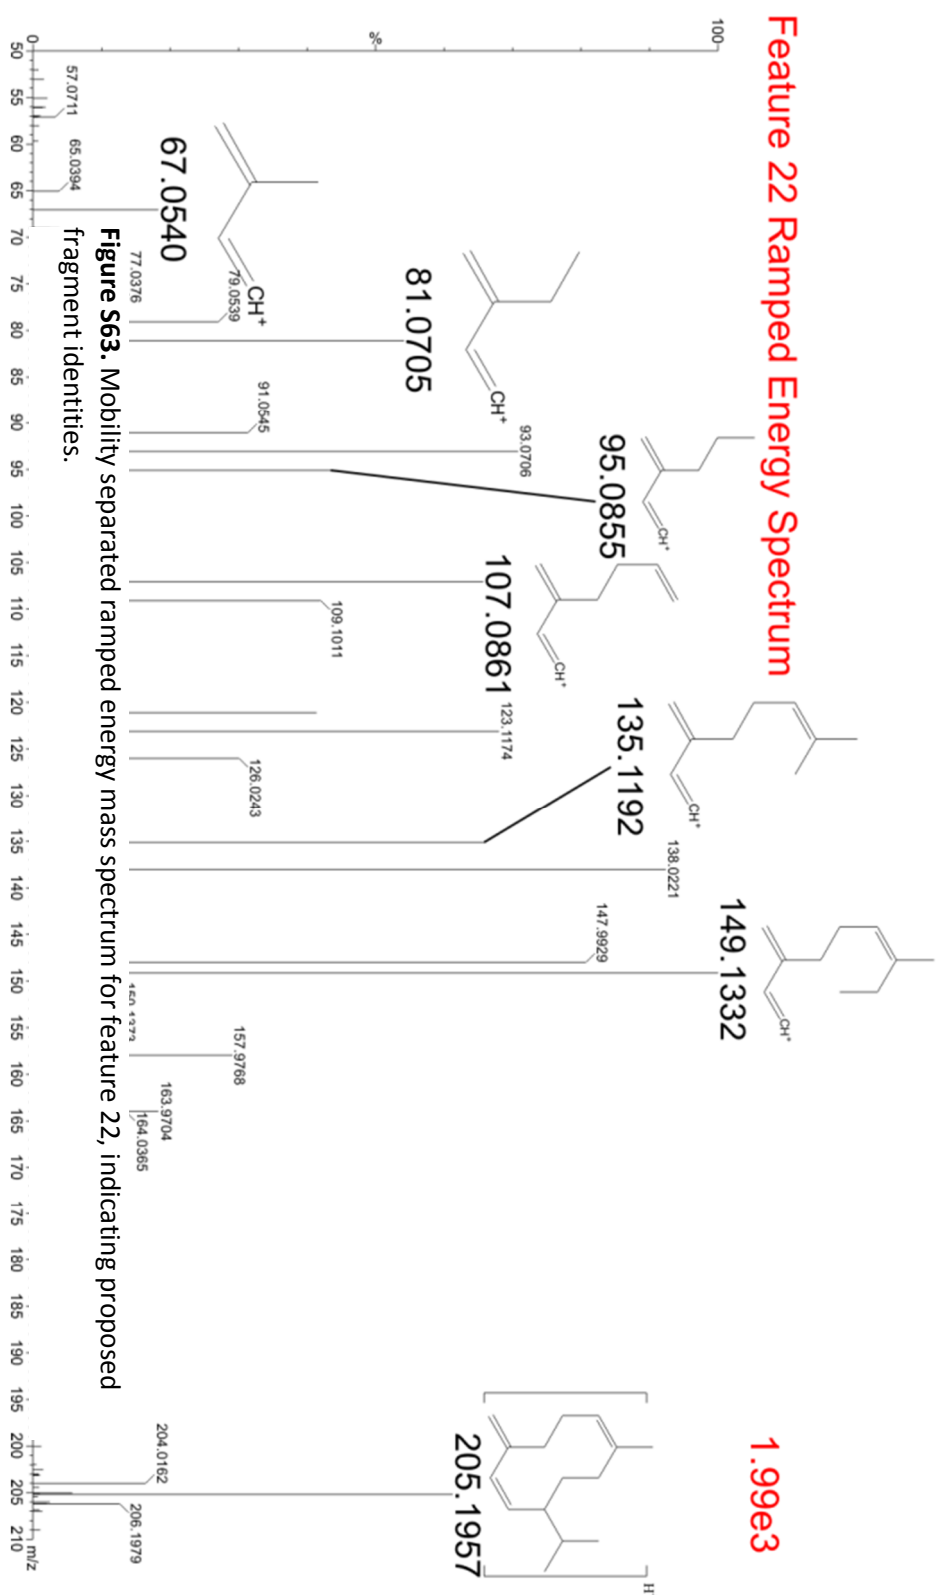

## D. Mass Spectral Data for Selected Features

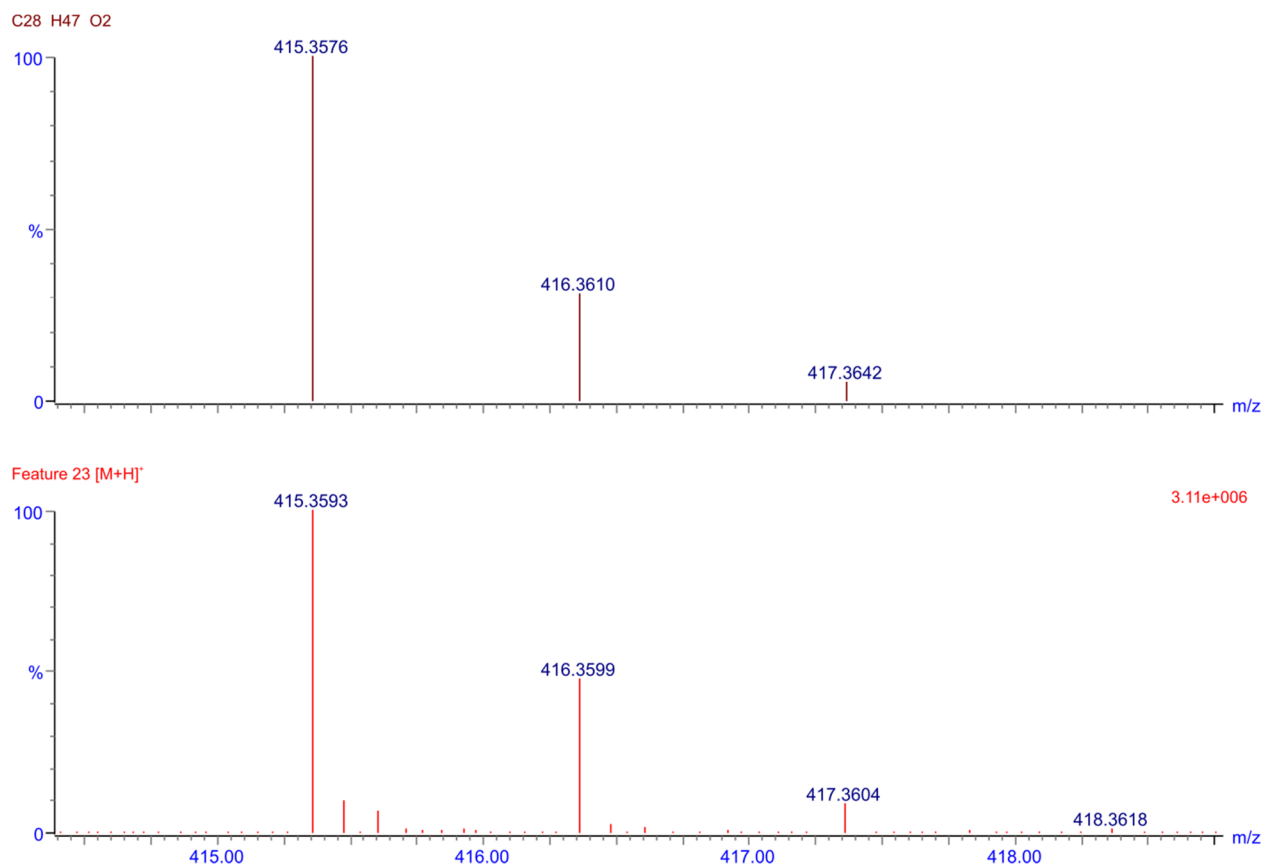

**Figure S64. (Above)** Theoretical isotopic profile for  $[C_{28}H_{46}O_2+H]^+$ . **(Below)** Accurate mass isotopic envelope of feature 23, as specified in Table 1.

### D. Mass Spectral Data for Selected Features

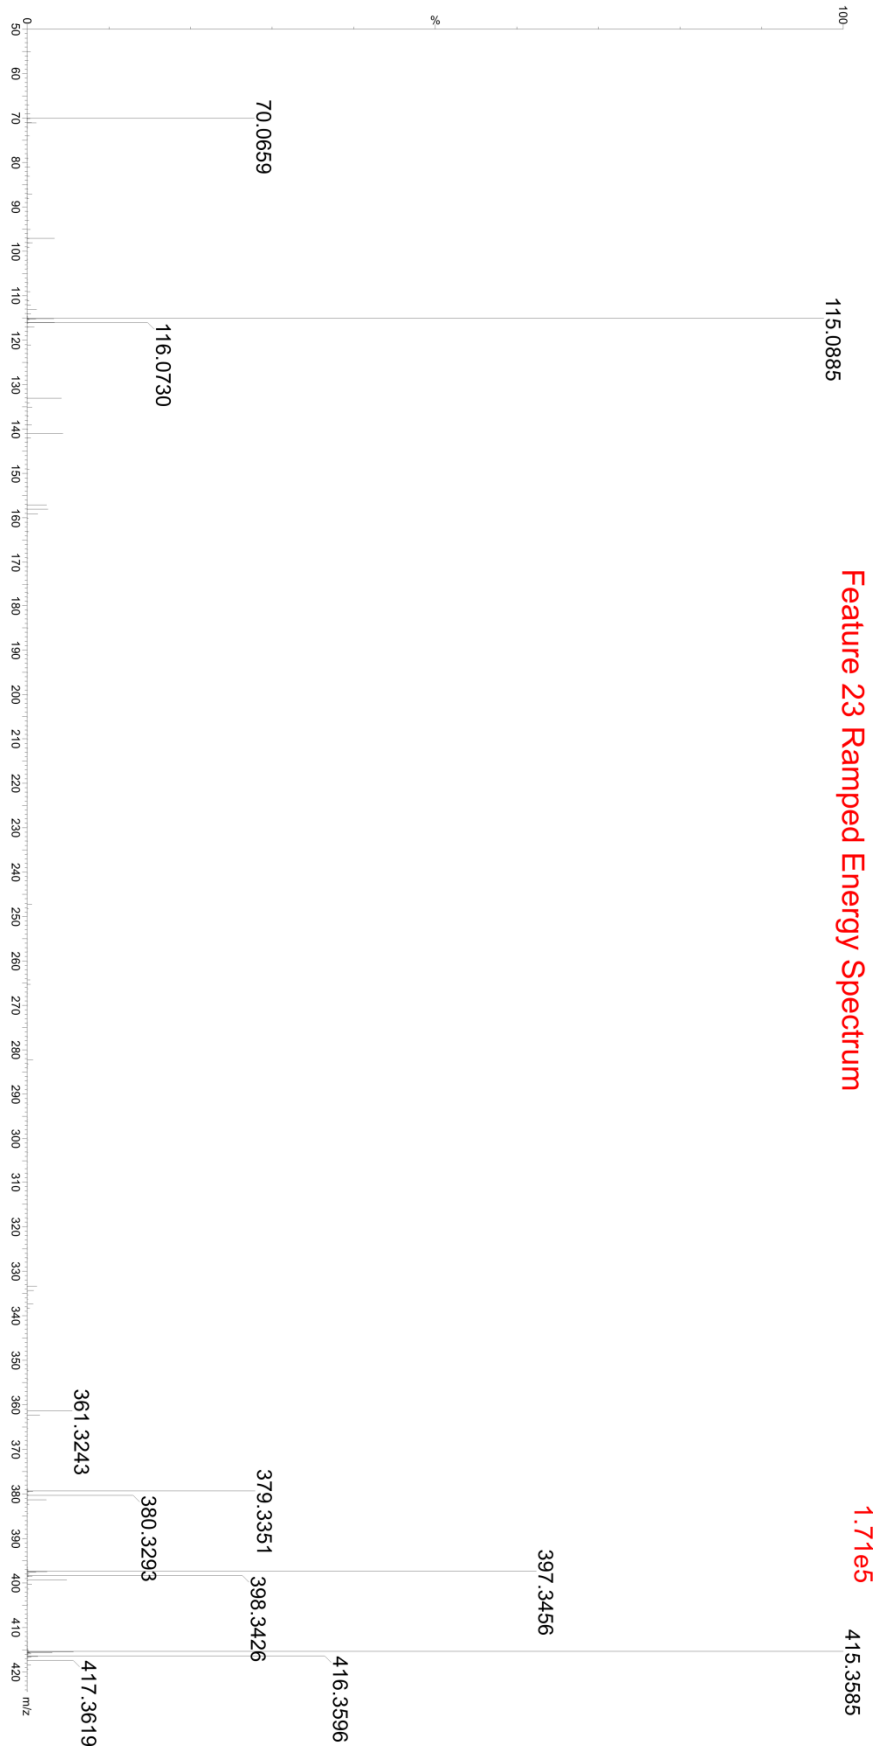

Figure S65. Mobility separated ramped energy mass spectrum for feature 23.

### D. Mass Spectral Data for Selected Features

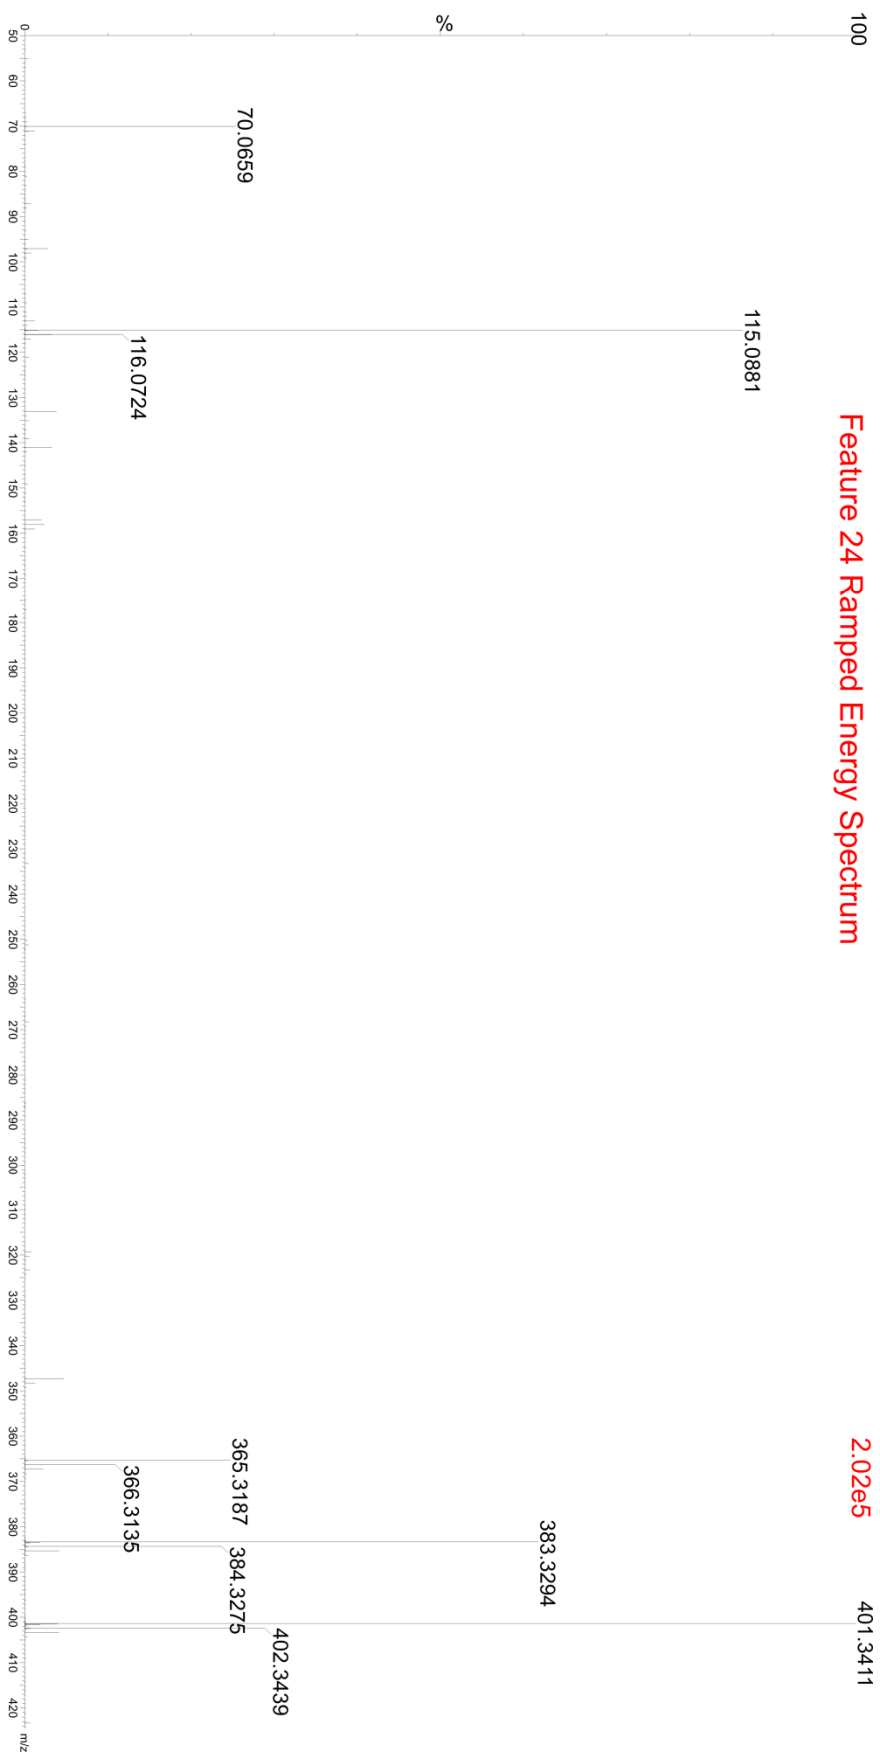

Figure S66. Mobility separated ramped energy mass spectrum for feature 24.



### D. Mass Spectral Data for Selected Features

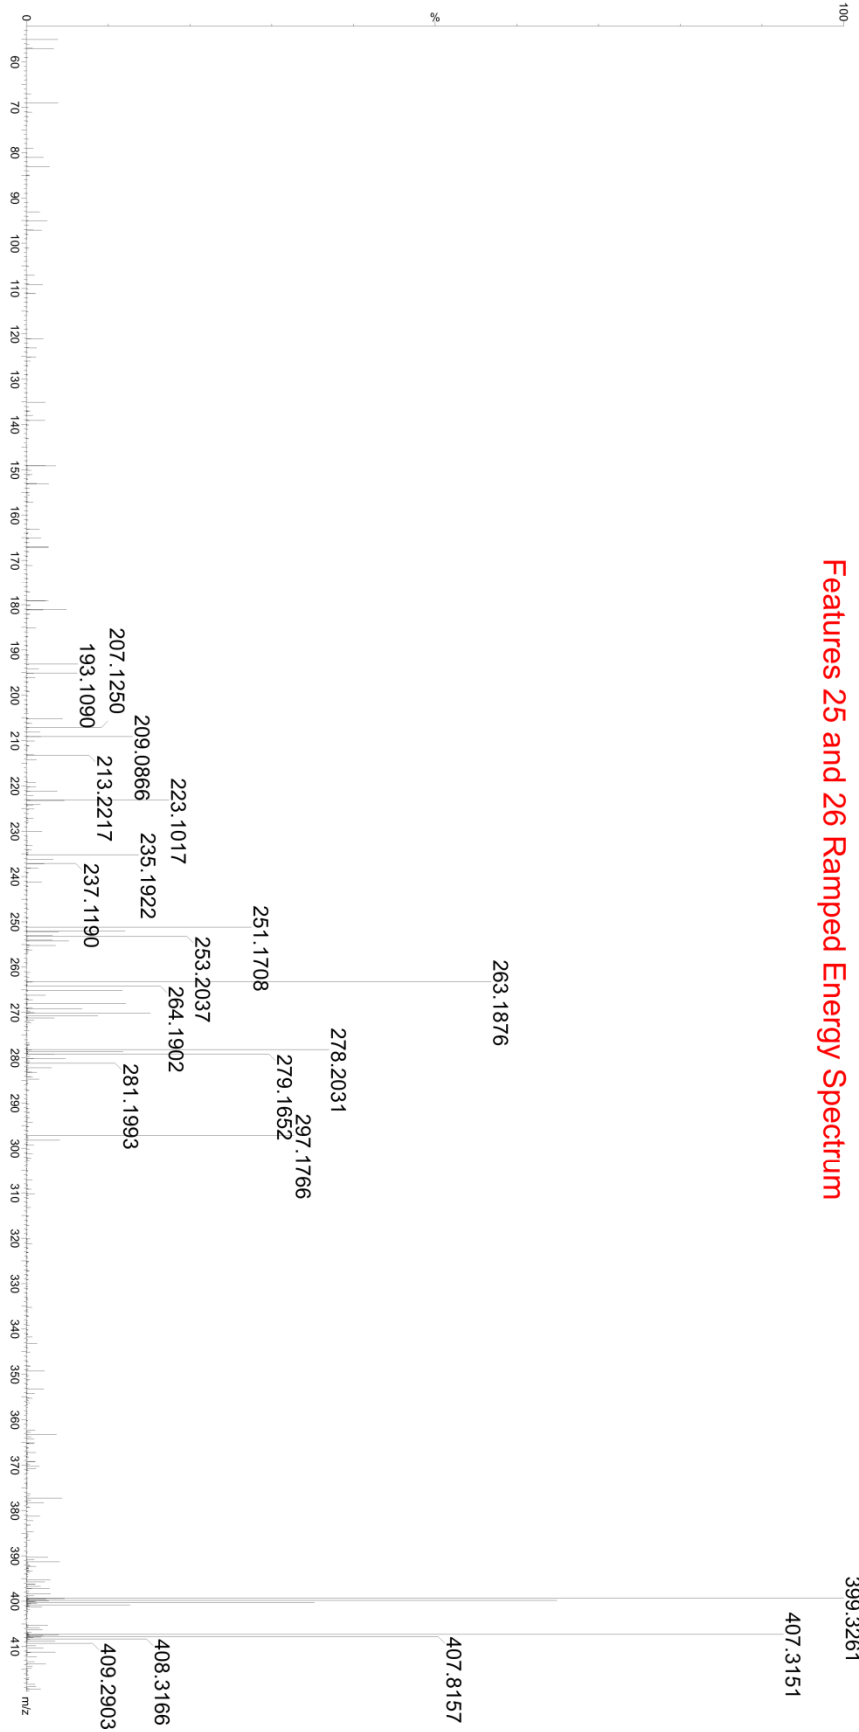

Features 25 and 26 Ramped Energy Spectrum

3.91e4

Figure S67. Mobility separated ramped energy mass spectrum for features 25 and 26.

### D. Mass Spectral Data for Selected Features

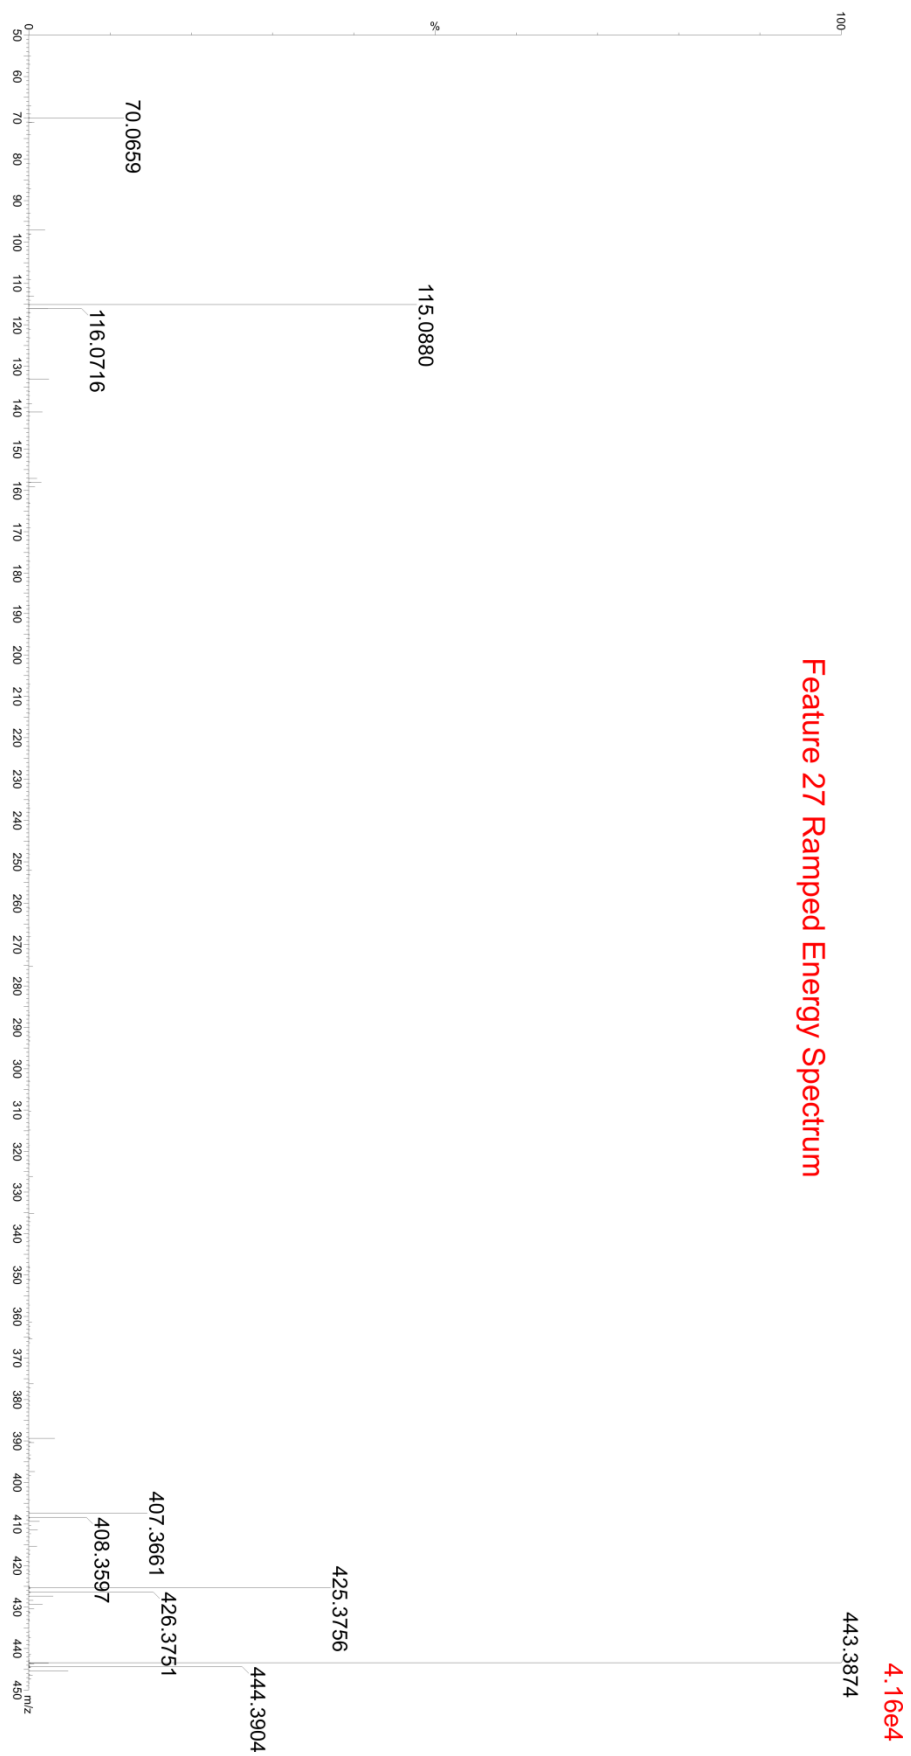

Figure S68. Mobility separated ramped energy mass spectrum for feature 27.

## D. Mass Spectral Data for Selected Features

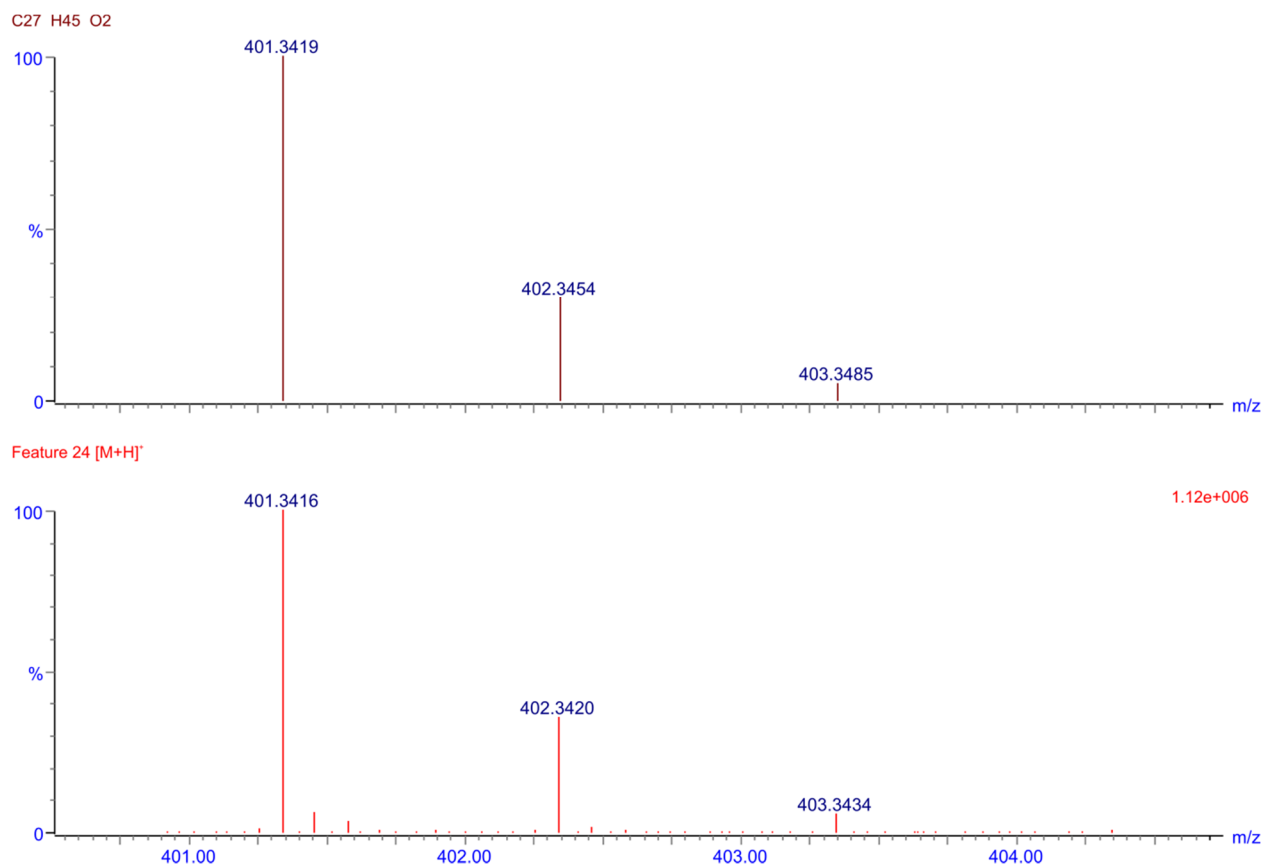

**Figure S69. (Above)** Theoretical isotopic profile for  $[C_{27}H_{44}O_2+H]^+$ . **(Below)** Accurate mass isotopic envelope of feature 24, as specified in Table 1.

## D. Mass Spectral Data for Selected Features

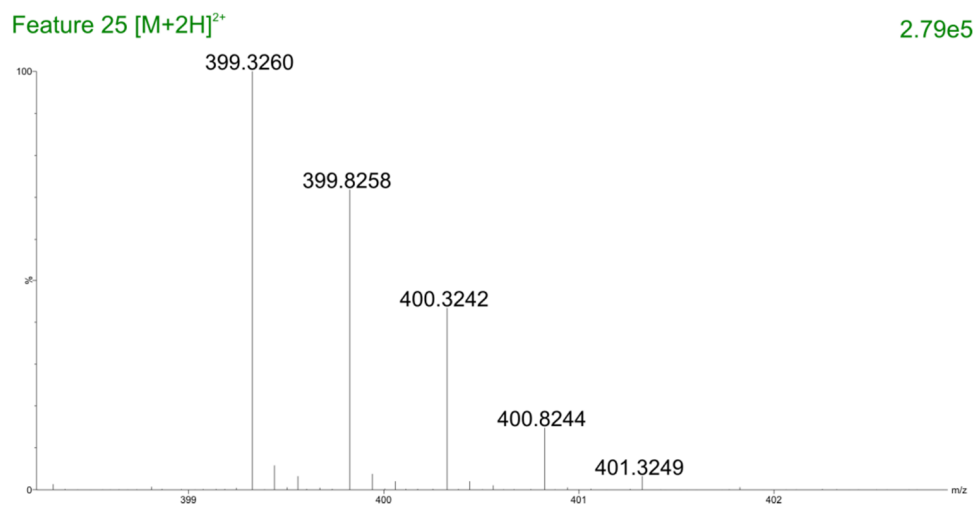

**Figure S70.** Accurate mass isotopic envelope of feature 25, as specified in Table 1.

## D. Mass Spectral Data for Selected Features

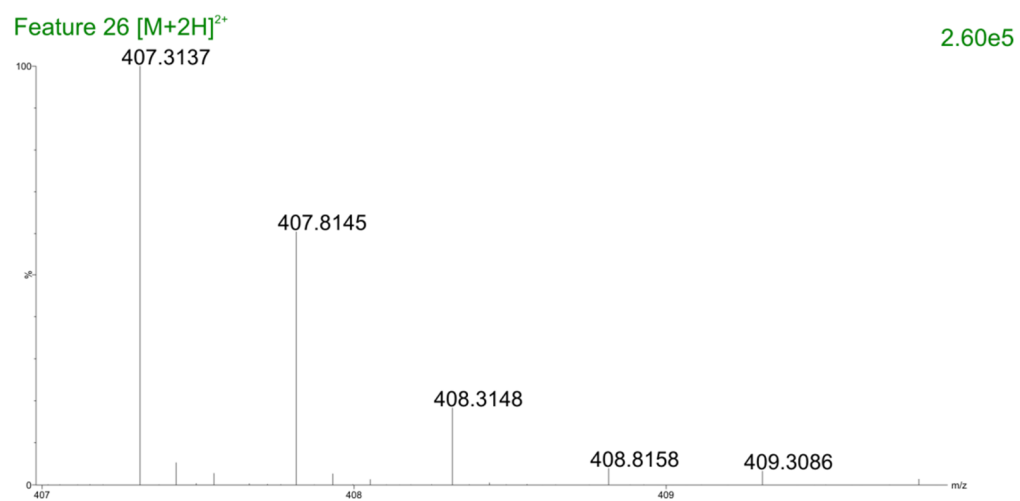

Figure S71. Accurate mass isotopic envelope of feature 26, as specified in Table 1.

## D. Mass Spectral Data for Selected Features

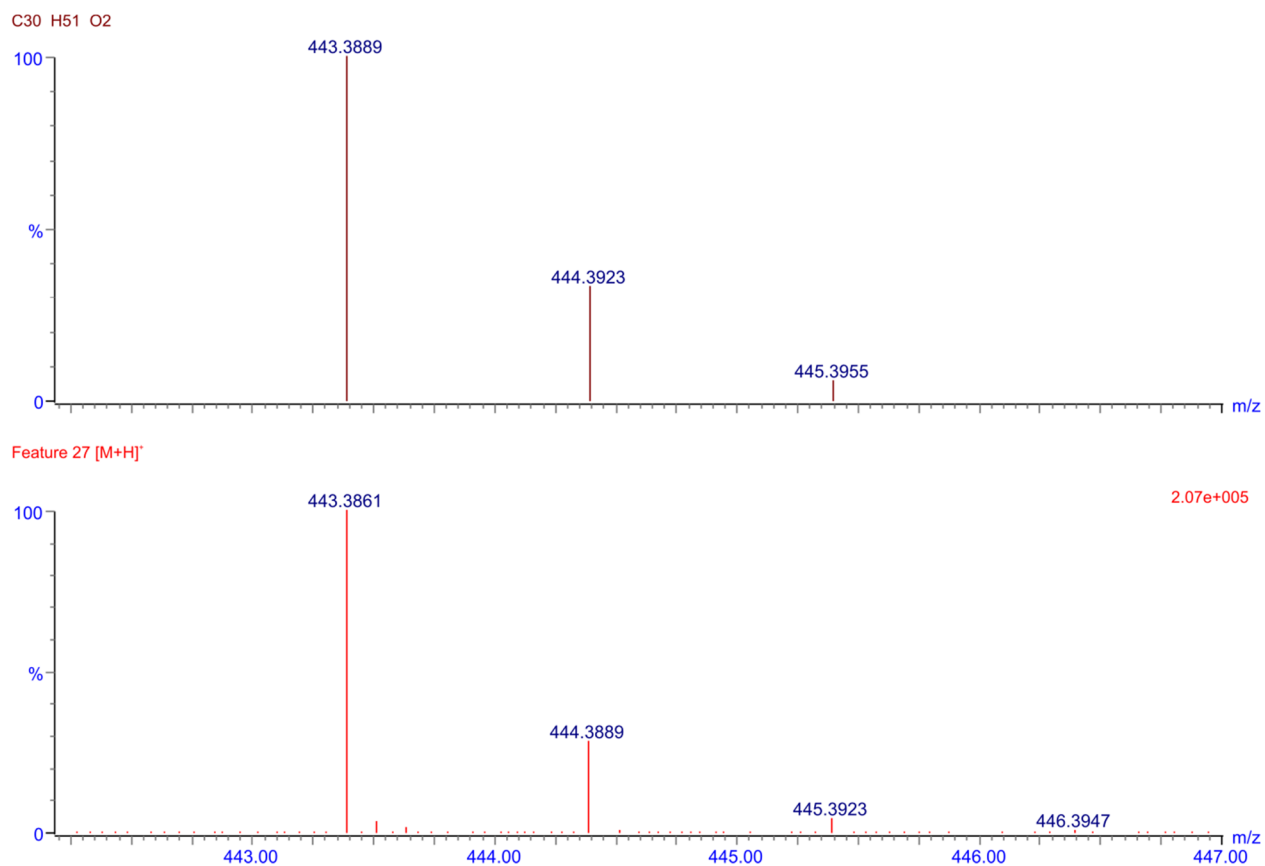

**Figure S72. (Above)** Theoretical isotopic profile for  $[C_{30}H_{50}O_2+H]^+$ . **(Below)** Accurate mass isotopic envelope of feature 27, as specified in Table 1.

## D. Mass Spectral Data for Selected Features

### Feature 1 EIC ( $\pm 0.01\text{Da}$ )

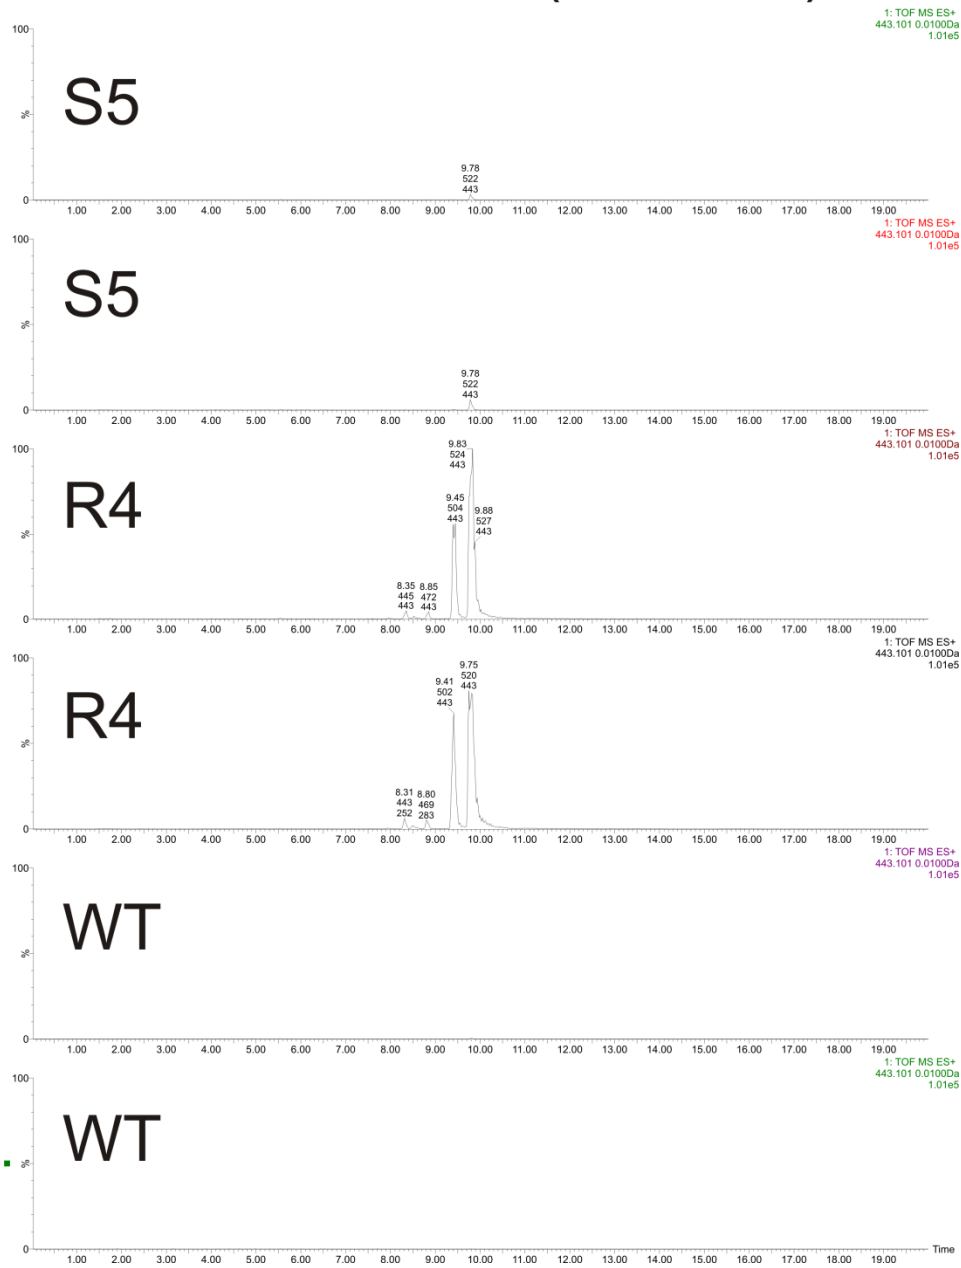

Figure S73. Extracted ion chromatograms for feature 1 w/  $\pm 0.01\text{Da}$  tolerance.

## D. Mass Spectral Data for Selected Features

### Feature 2 EIC ( $\pm 0.01\text{Da}$ )

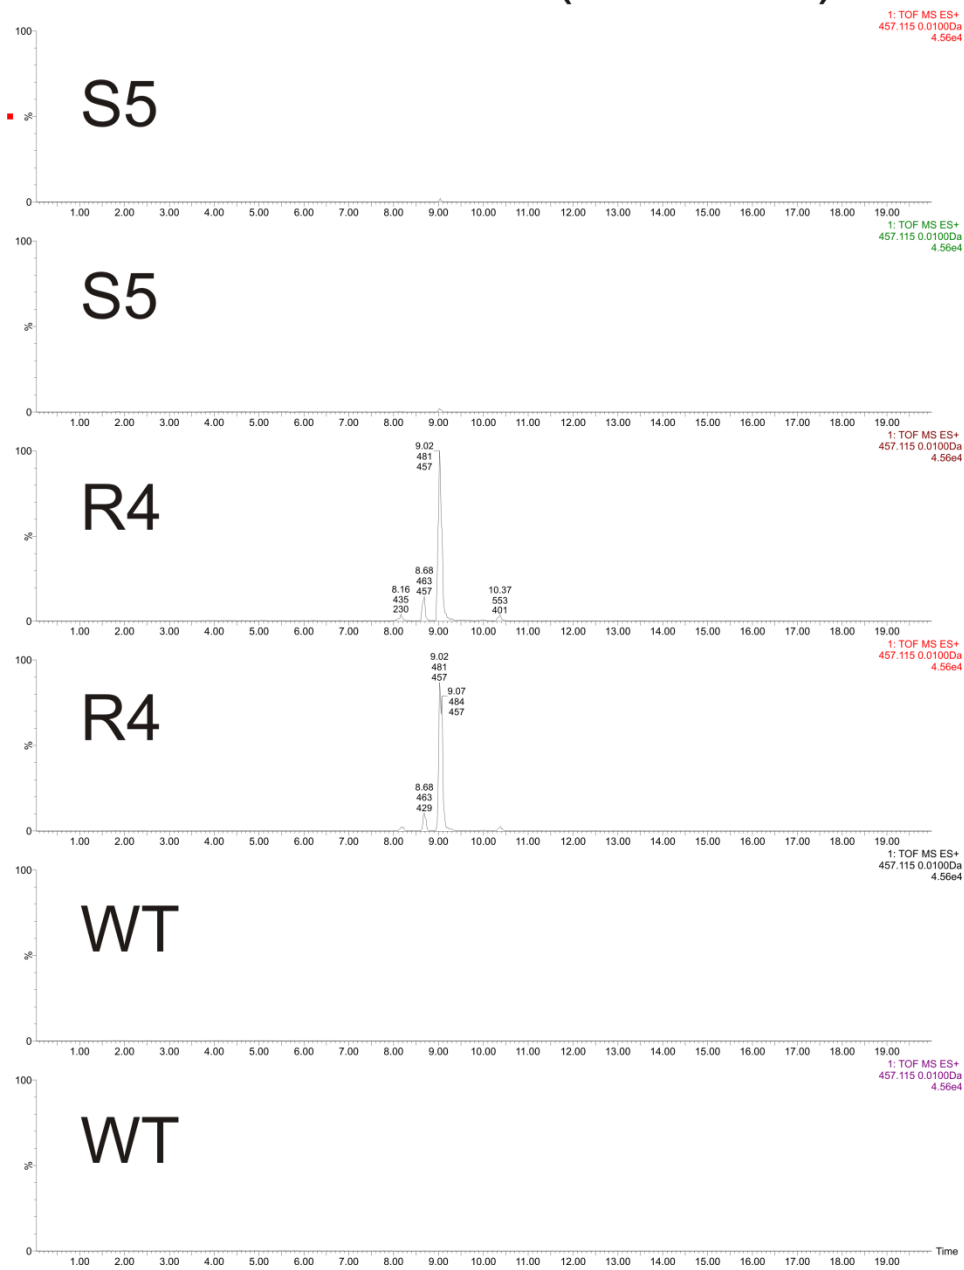

Figure S74. Extracted ion chromatograms for feature 2 w/  $\pm 0.01\text{Da}$  tolerance.



## D. Mass Spectral Data for Selected Features

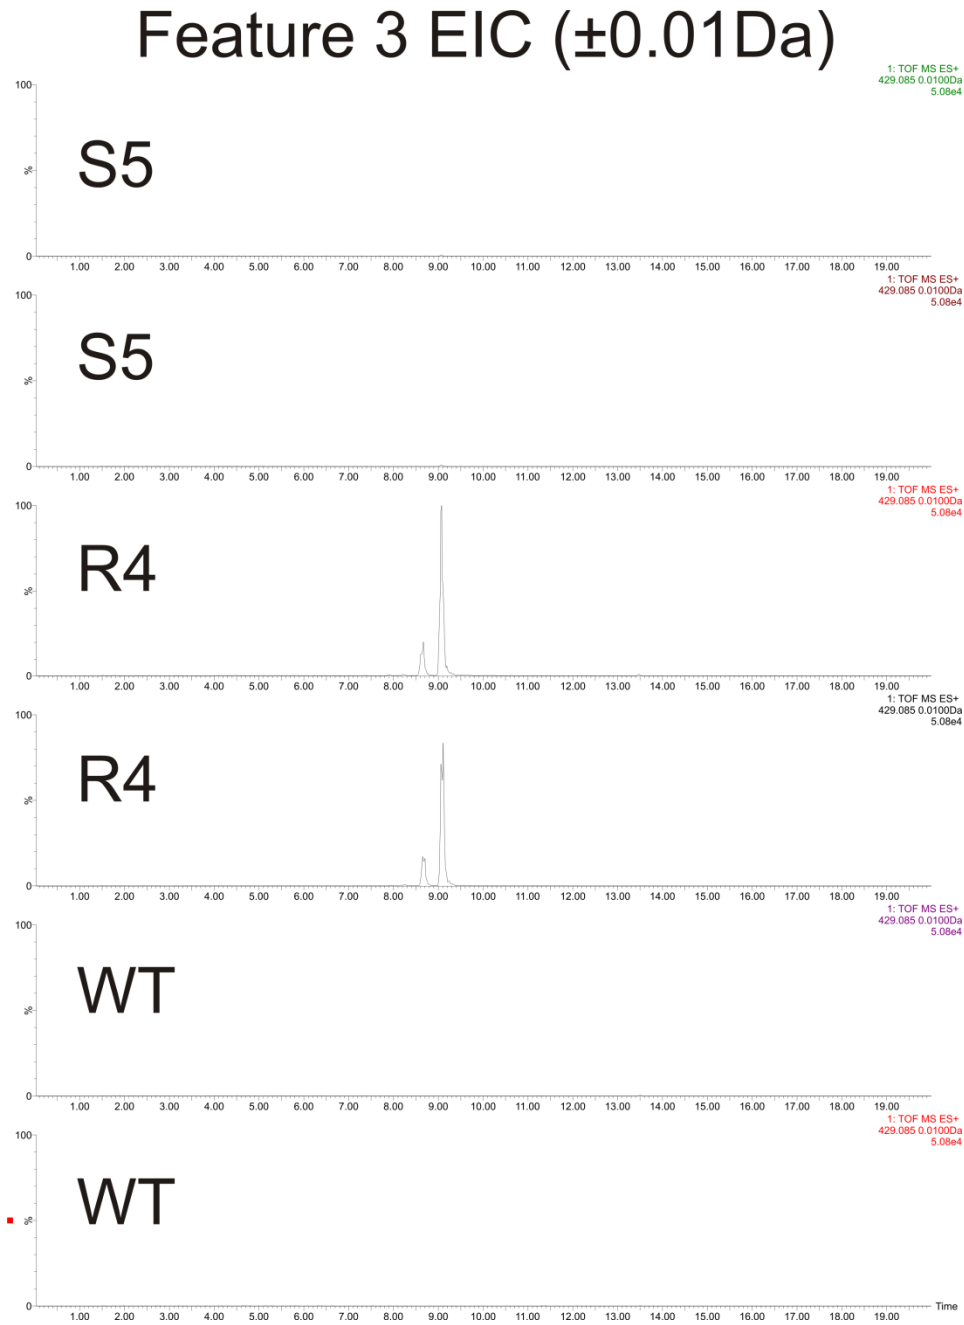

**Figure S75.** Extracted ion chromatograms for feature 3 w/  $\pm 0.01\text{Da}$  tolerance.

## D. Mass Spectral Data for Selected Features

# Feature 4 EIC ( $\pm 0.01\text{Da}$ )

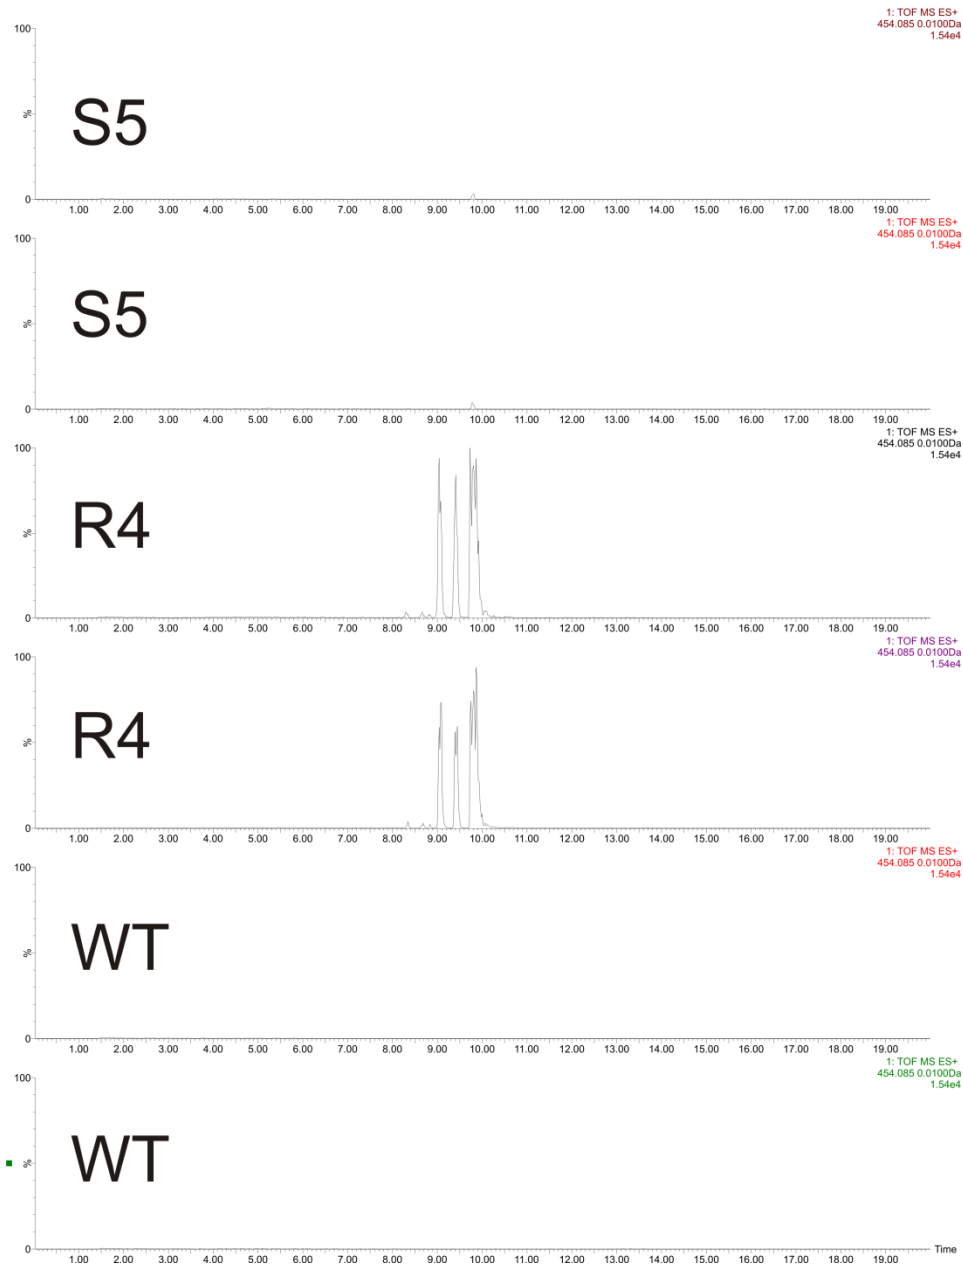

Figure S76. Extracted ion chromatograms for feature 4 w/  $\pm 0.01\text{Da}$  tolerance.

## D. Mass Spectral Data for Selected Features

### Feature 5 EIC ( $\pm 0.01\text{Da}$ )

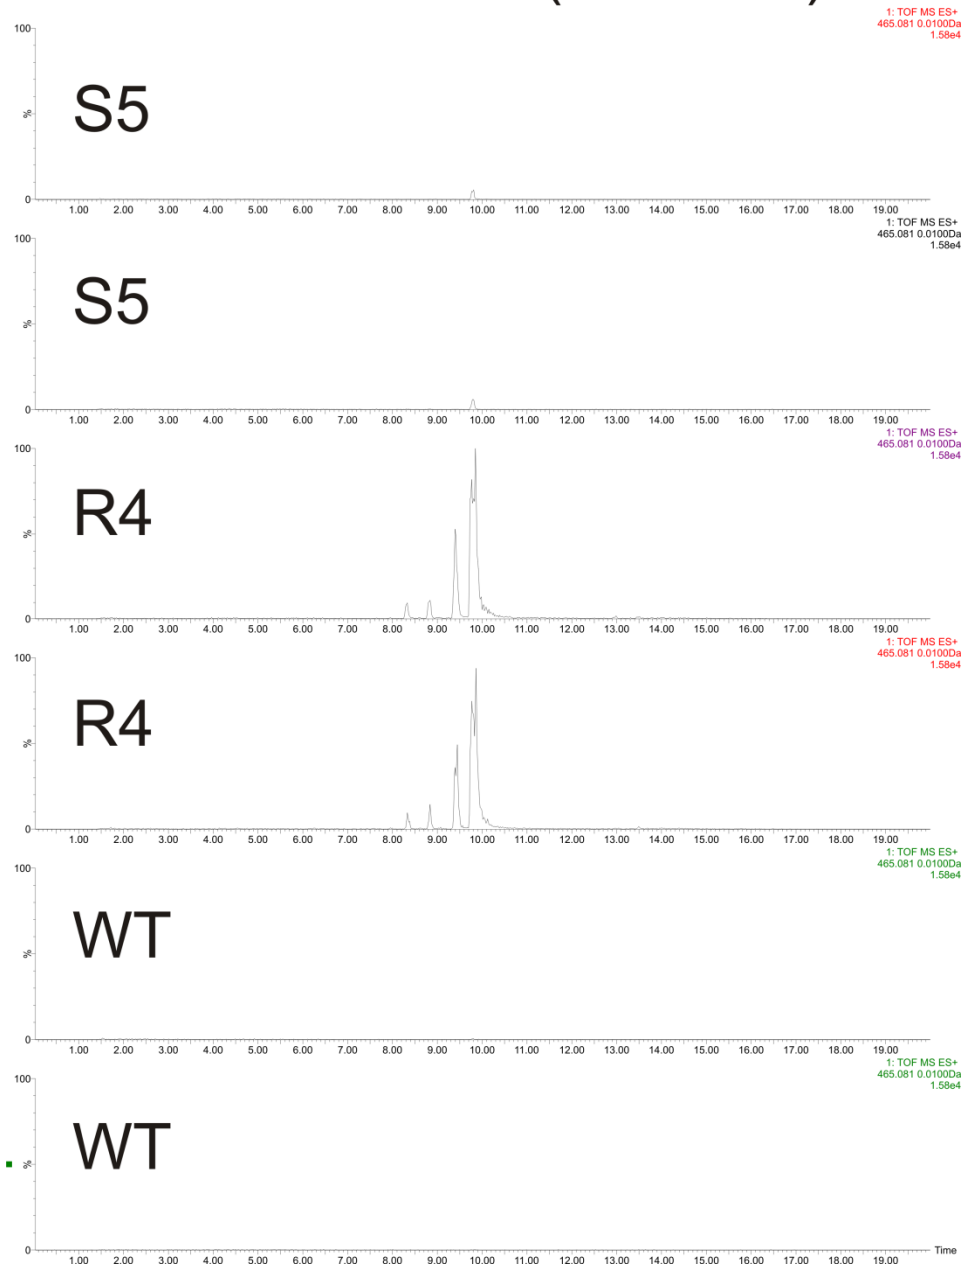

Figure S77. Extracted ion chromatograms for feature 5 w/  $\pm 0.01\text{Da}$  tolerance.

D. Mass Spectral Data for Selected Features

# Feature 6 EIC ( $\pm 0.01\text{Da}$ )

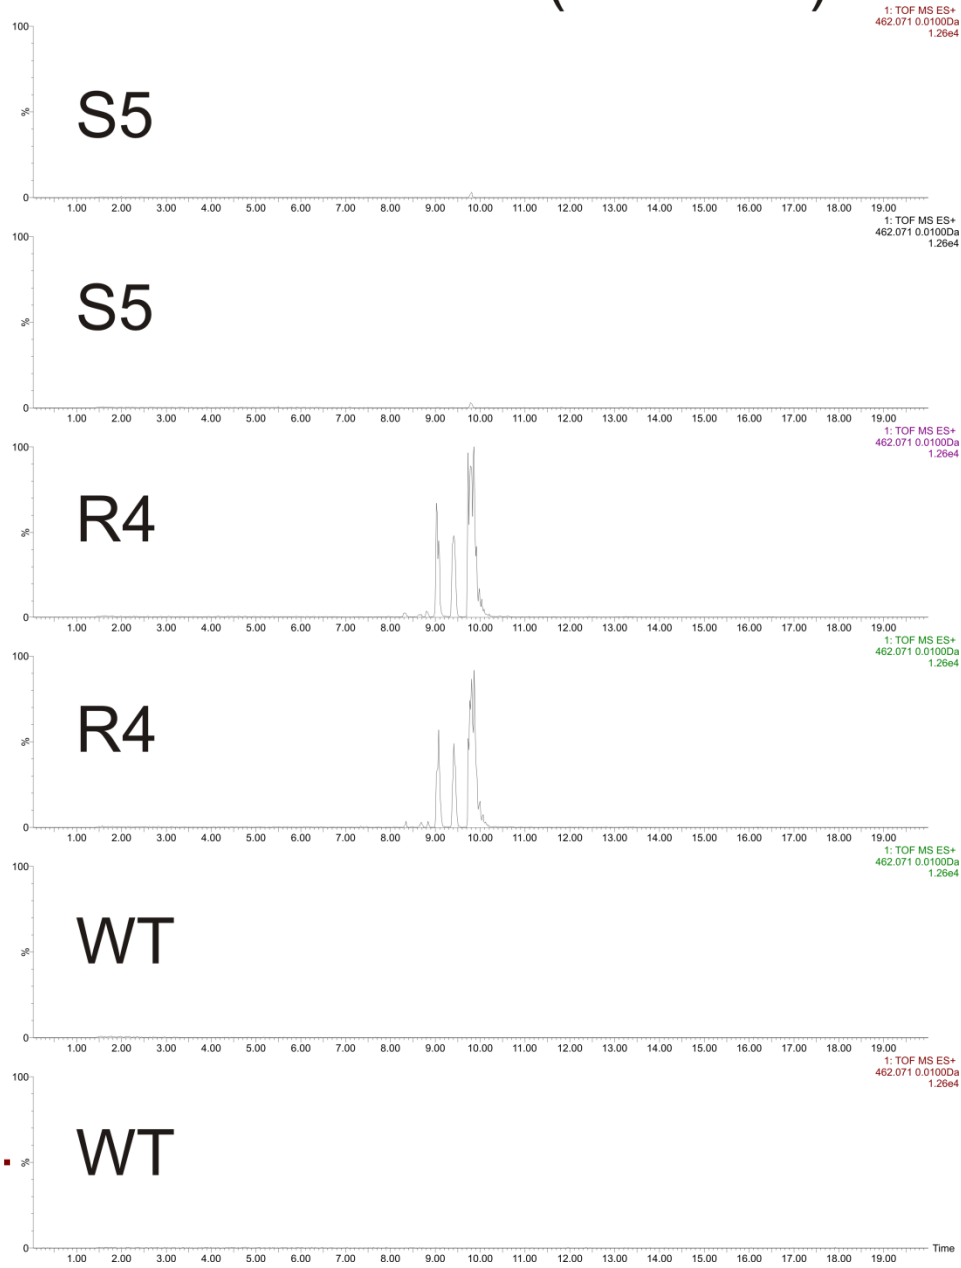

Figure S78. Extracted ion chromatograms for feature 6 w/  $\pm 0.01\text{Da}$  tolerance.

D. Mass Spectral Data for Selected Features

# Feature 7 EIC ( $\pm 0.01\text{Da}$ )

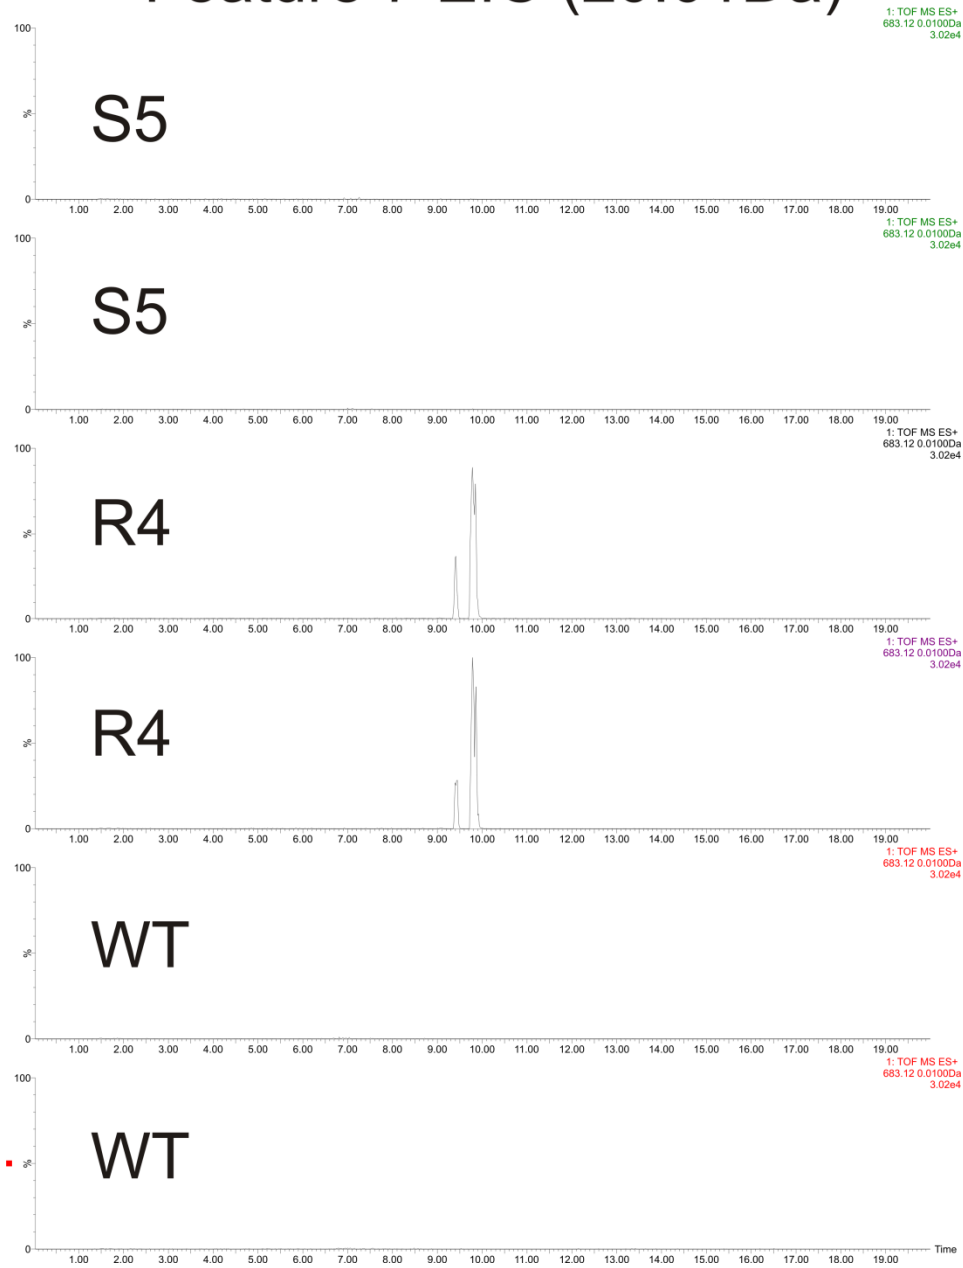

Figure S79. Extracted ion chromatograms for feature 7 w/  $\pm 0.01\text{Da}$  tolerance.

## D. Mass Spectral Data for Selected Features

### Feature 8 EIC ( $\pm 0.01\text{Da}$ )

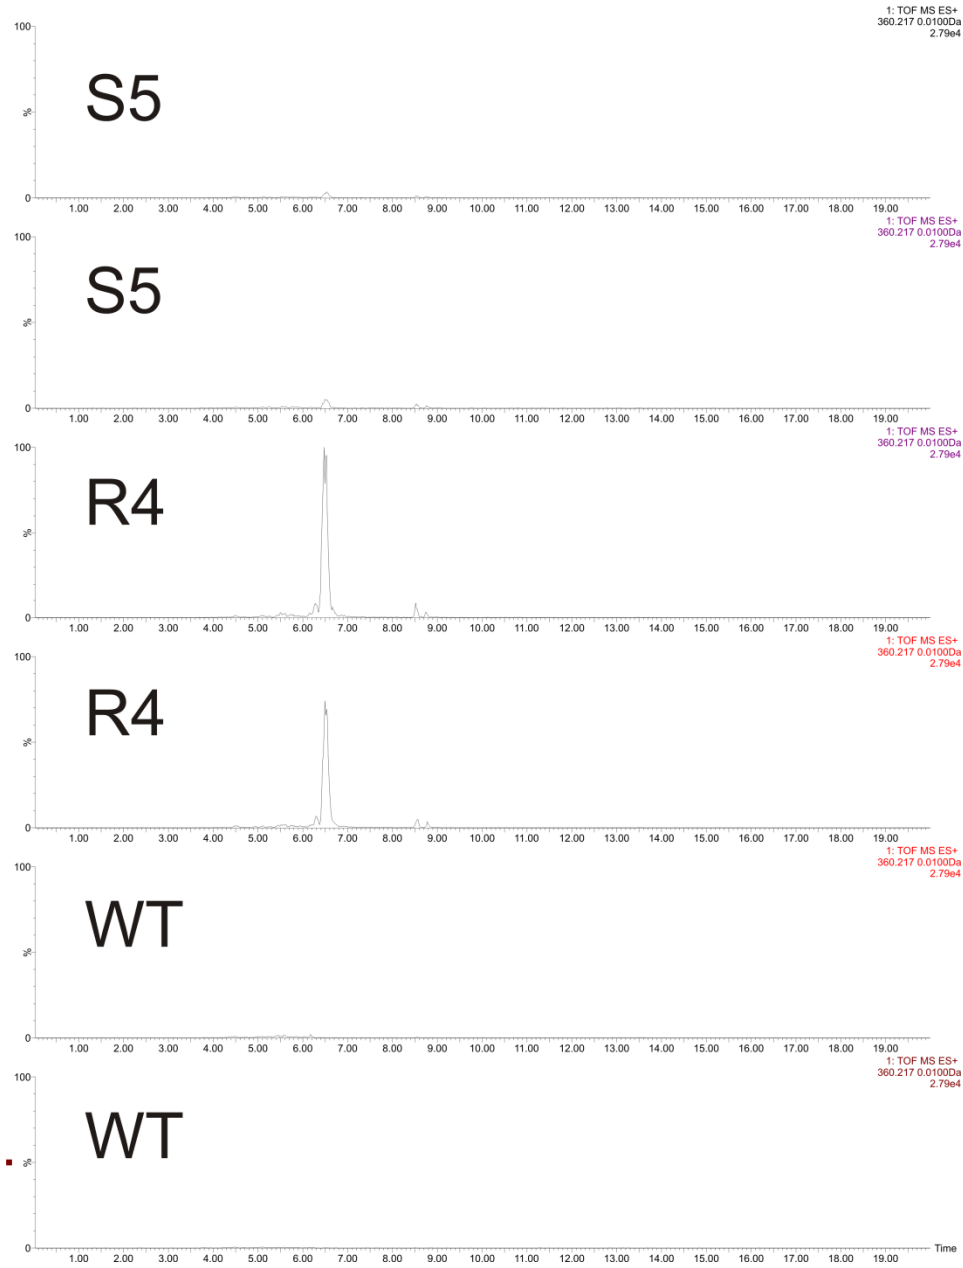

Figure S80. Extracted ion chromatograms for feature 8 w/  $\pm 0.01\text{Da}$  tolerance.

D. Mass Spectral Data for Selected Features

# Feature 9 EIC ( $\pm 0.01\text{Da}$ )

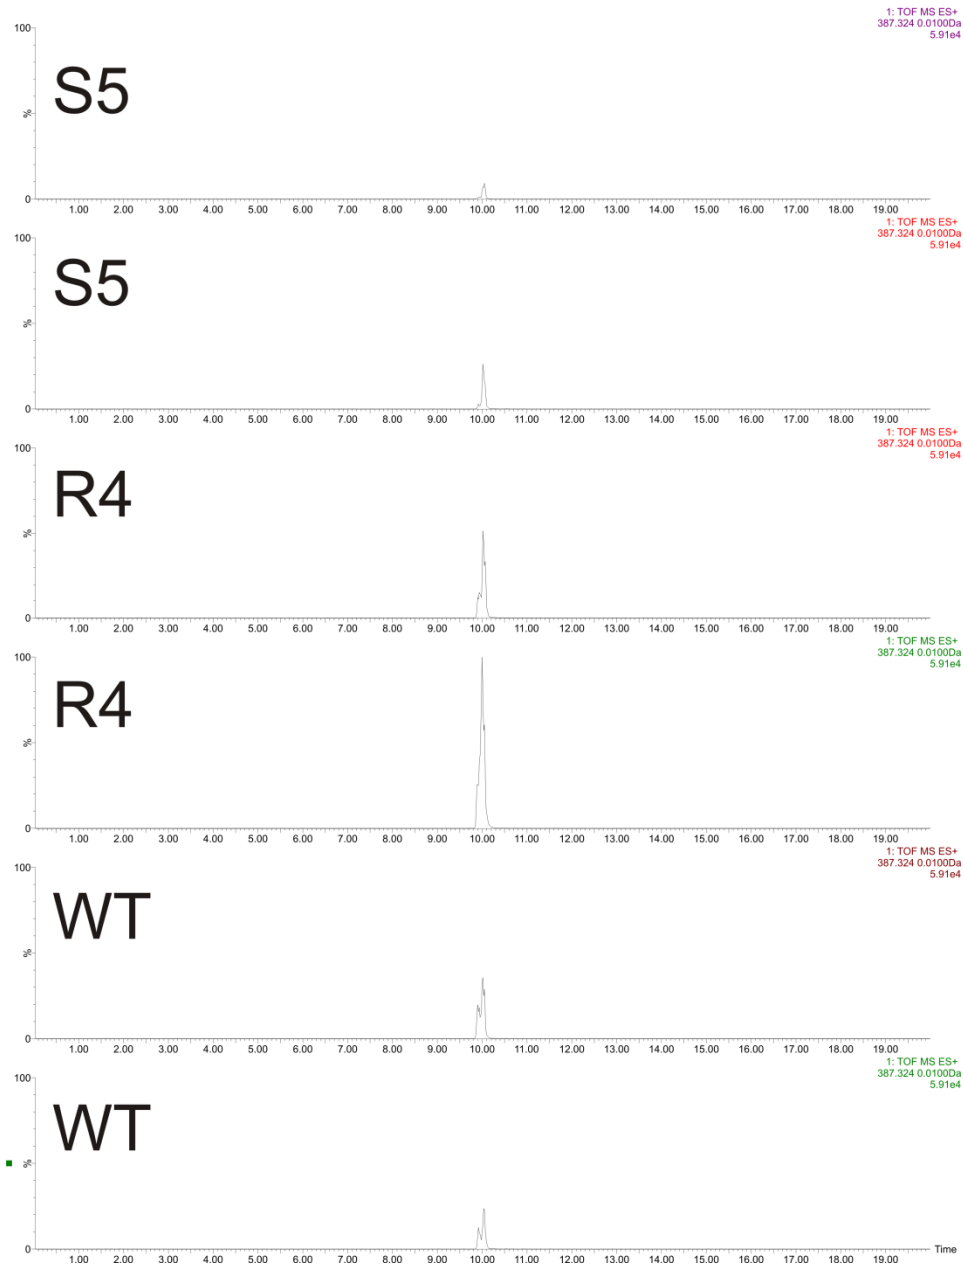

Figure S81. Extracted ion chromatograms for feature 9 w/  $\pm 0.01\text{Da}$  tolerance.

D. Mass Spectral Data for Selected Features

# Feature 10 EIC ( $\pm 0.01\text{Da}$ )

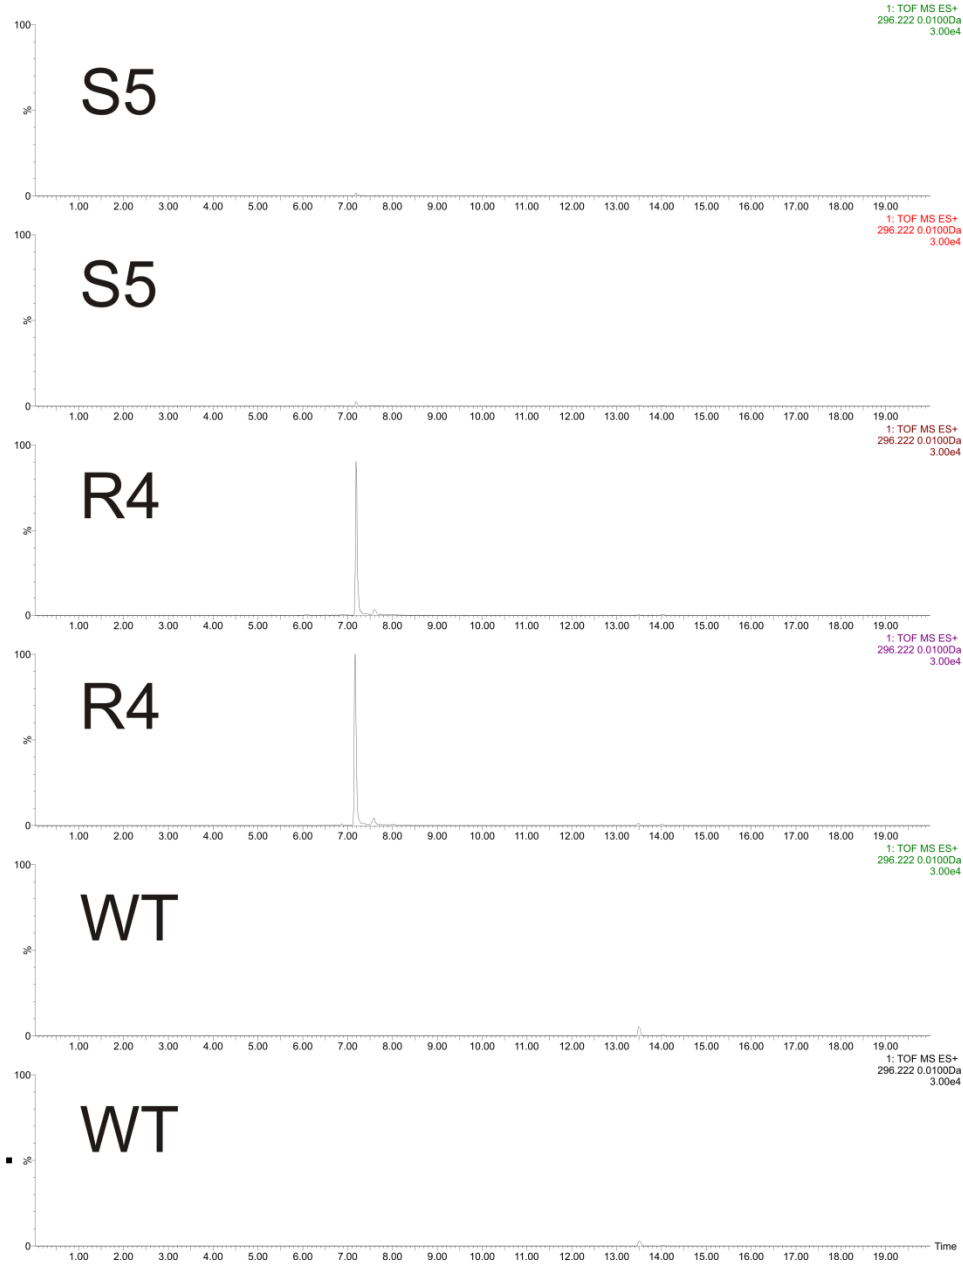

Figure S82. Extracted ion chromatograms for feature 10 w/  $\pm 0.01\text{Da}$  tolerance.



D. Mass Spectral Data for Selected Features

# Feature 11 EIC ( $\pm 0.01\text{Da}$ )

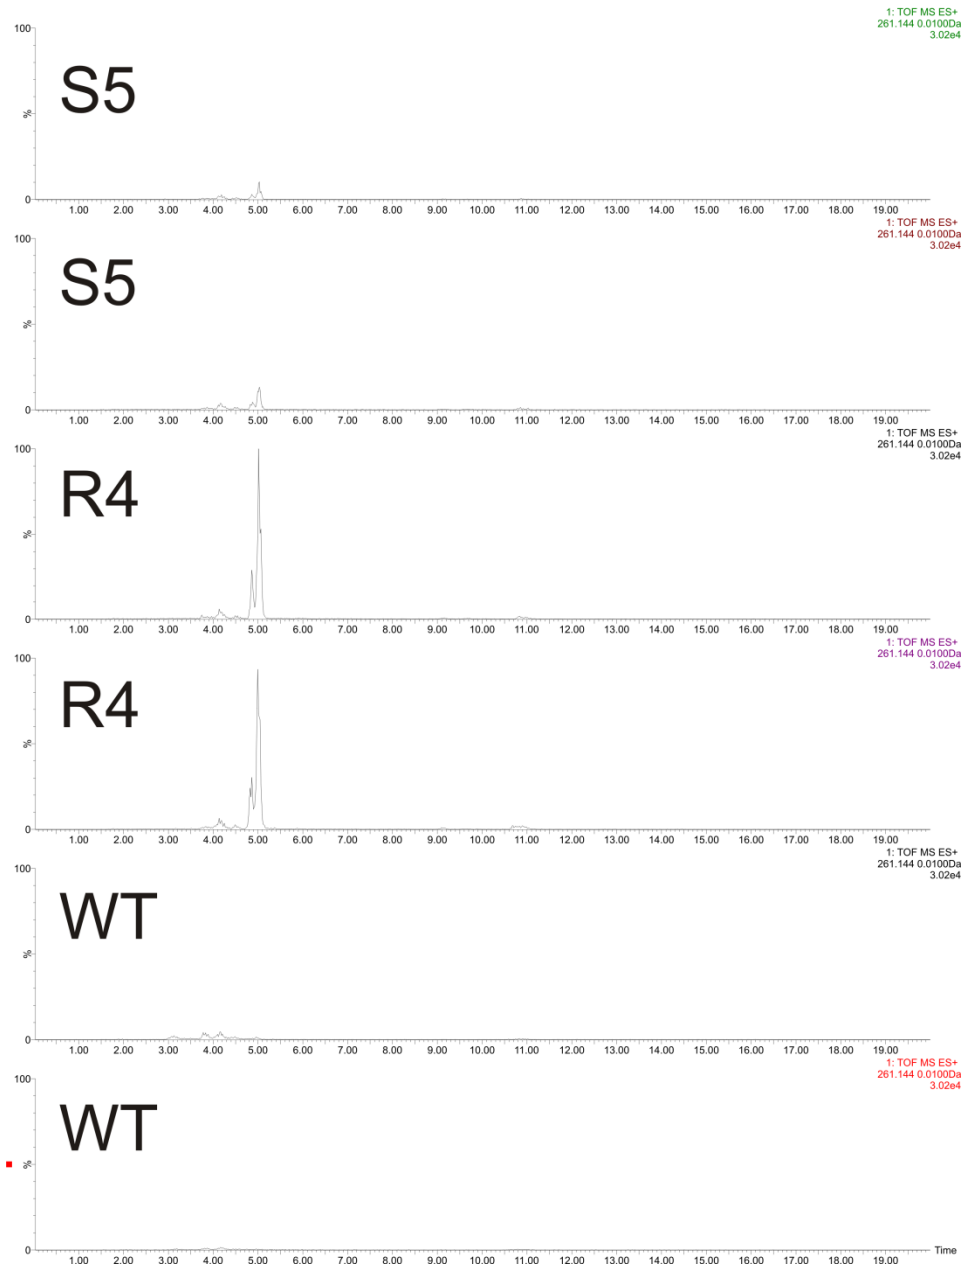

Figure S83. Extracted ion chromatograms for feature 11 w/  $\pm 0.01\text{Da}$  tolerance.

## D. Mass Spectral Data for Selected Features

# Feature 12 EIC ( $\pm 0.01\text{Da}$ )

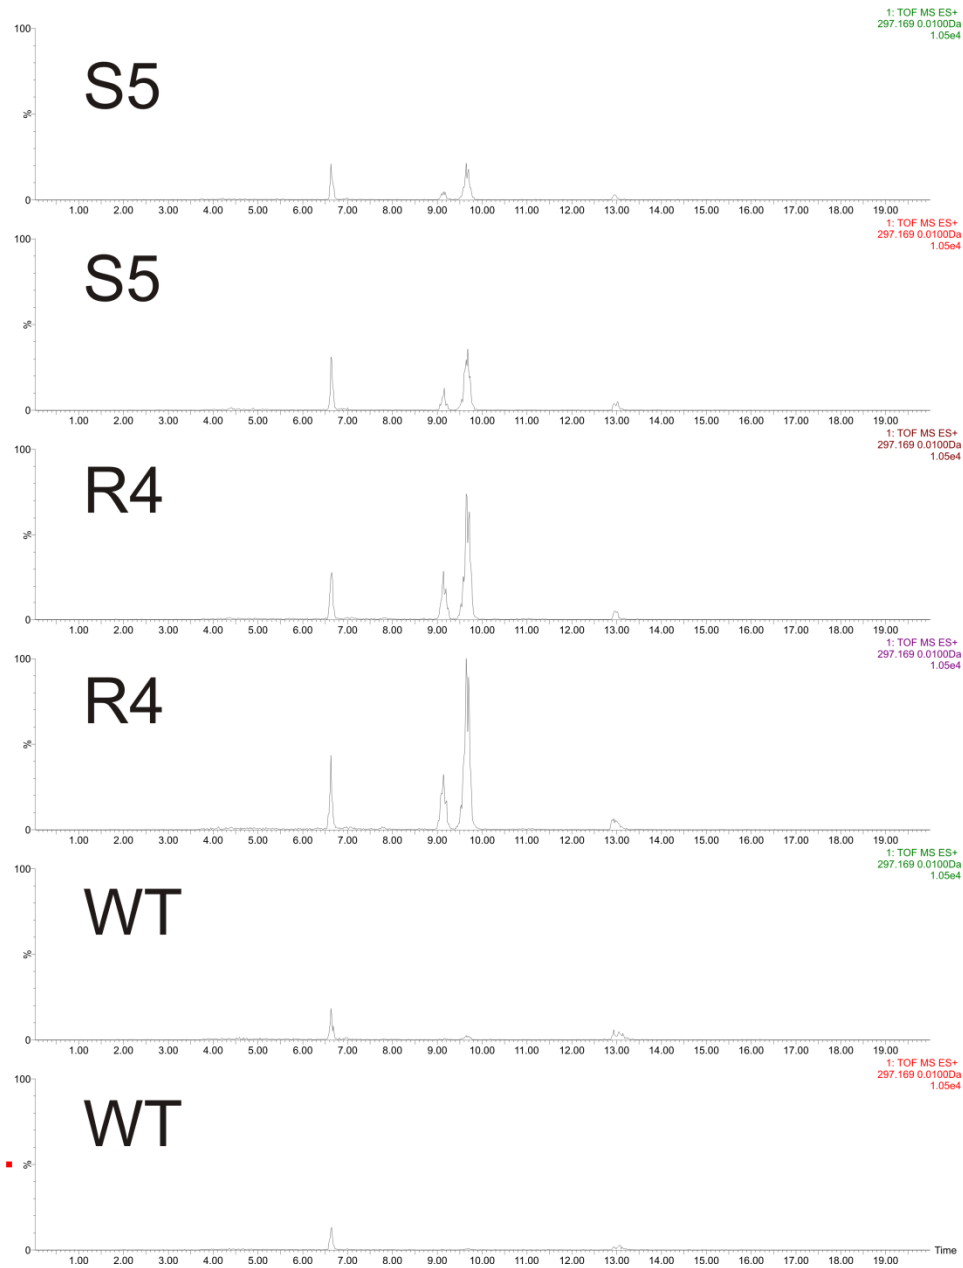

**Figure S84.** Extracted ion chromatograms for feature 12 w/  $\pm 0.01\text{Da}$  tolerance.

D. Mass Spectral Data for Selected Features

# Feature 13 EIC ( $\pm 0.01\text{Da}$ )

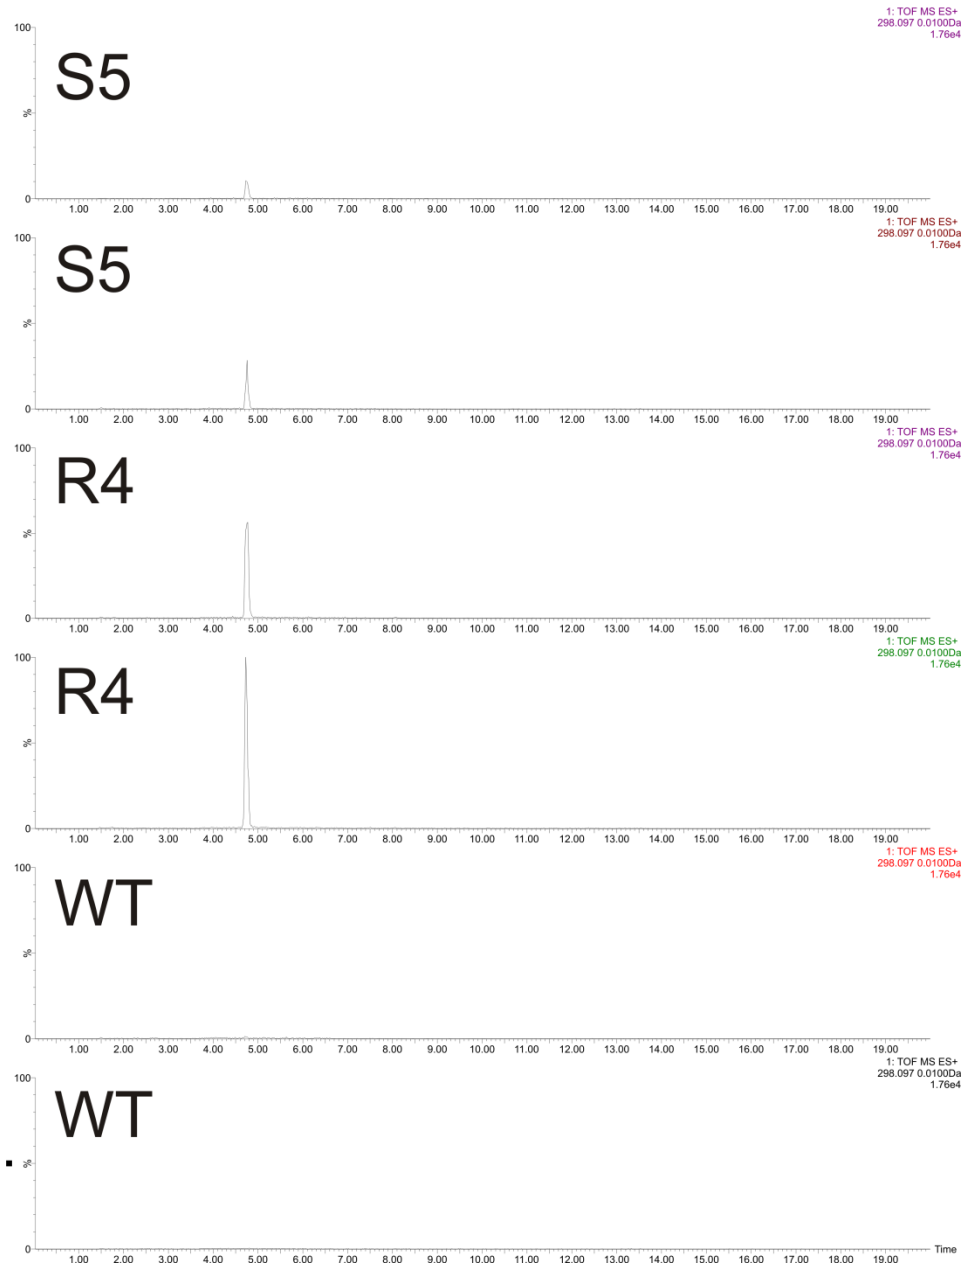

Figure S85. Extracted ion chromatograms for feature 13 w/  $\pm 0.01\text{Da}$  tolerance.

D. Mass Spectral Data for Selected Features

# Feature 14 EIC ( $\pm 0.01\text{Da}$ )

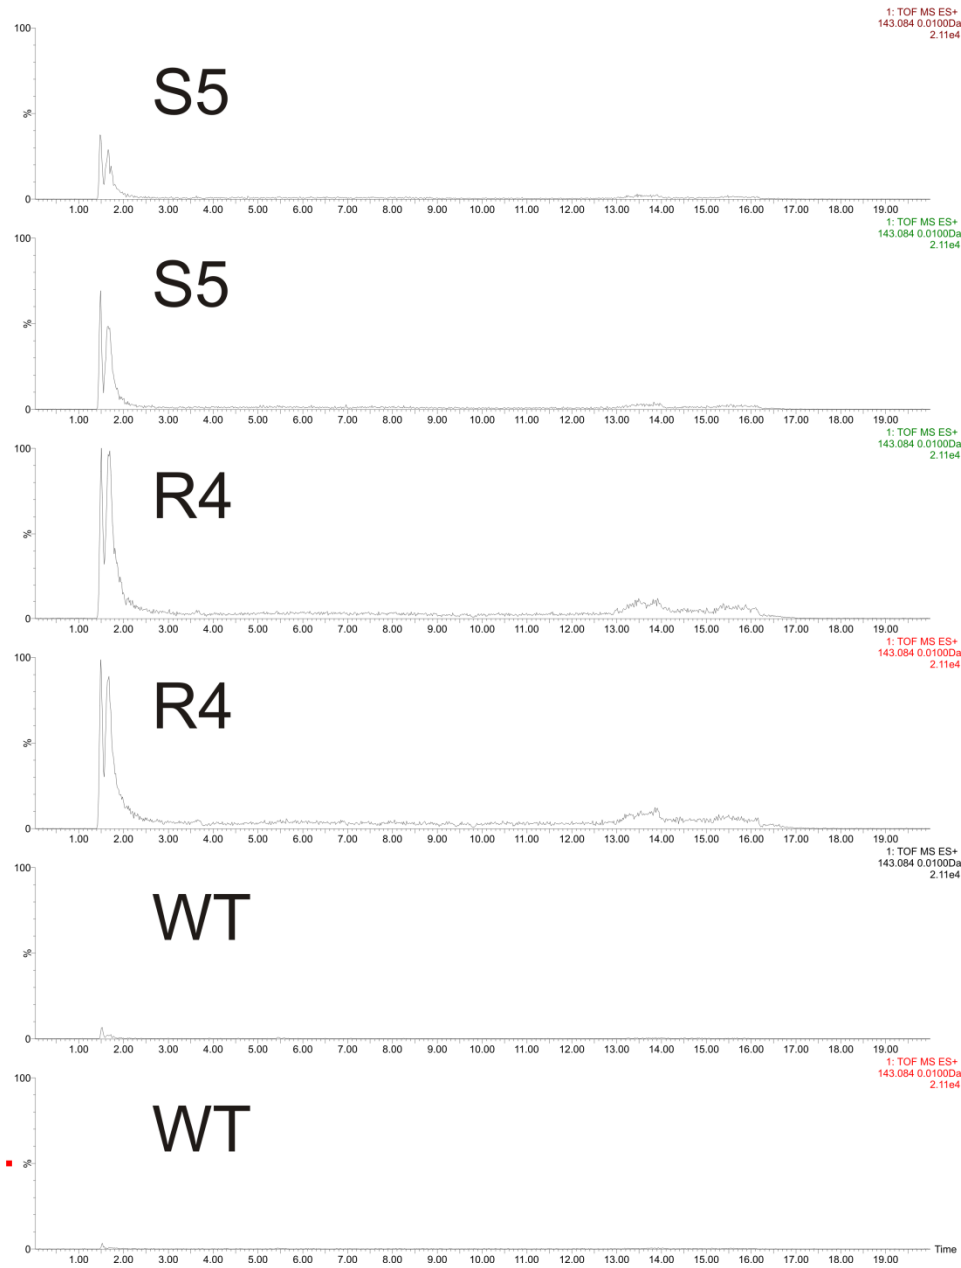

Figure S86. Extracted ion chromatograms for feature 14 w/  $\pm 0.01\text{Da}$  tolerance.

## D. Mass Spectral Data for Selected Features

### Feature 15 EIC ( $\pm 0.01\text{Da}$ )

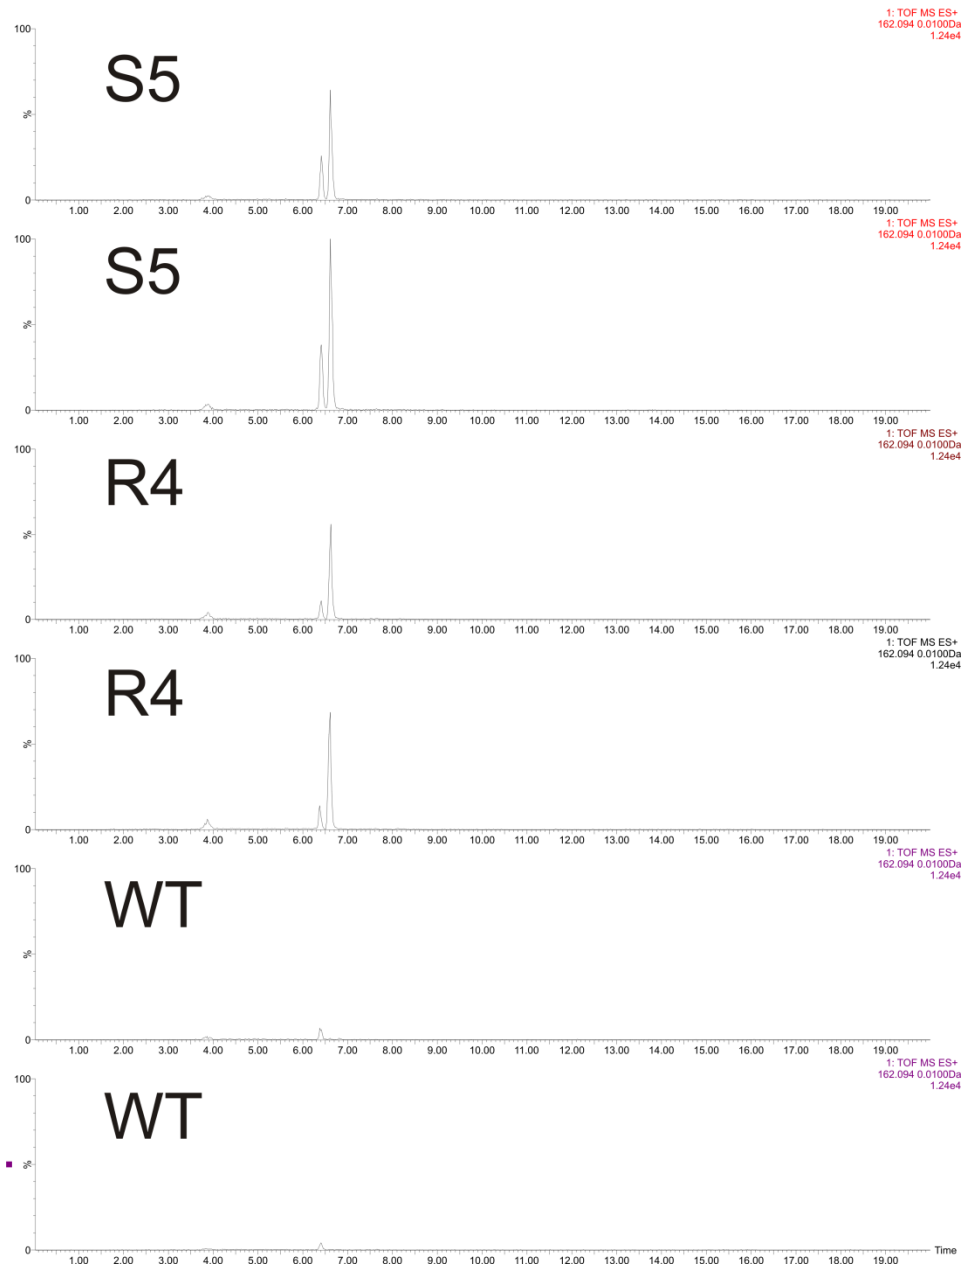

Figure S87. Extracted ion chromatograms for feature 15 w/  $\pm 0.01\text{Da}$  tolerance.

## D. Mass Spectral Data for Selected Features

### Feature 16 EIC ( $\pm 0.01\text{Da}$ )

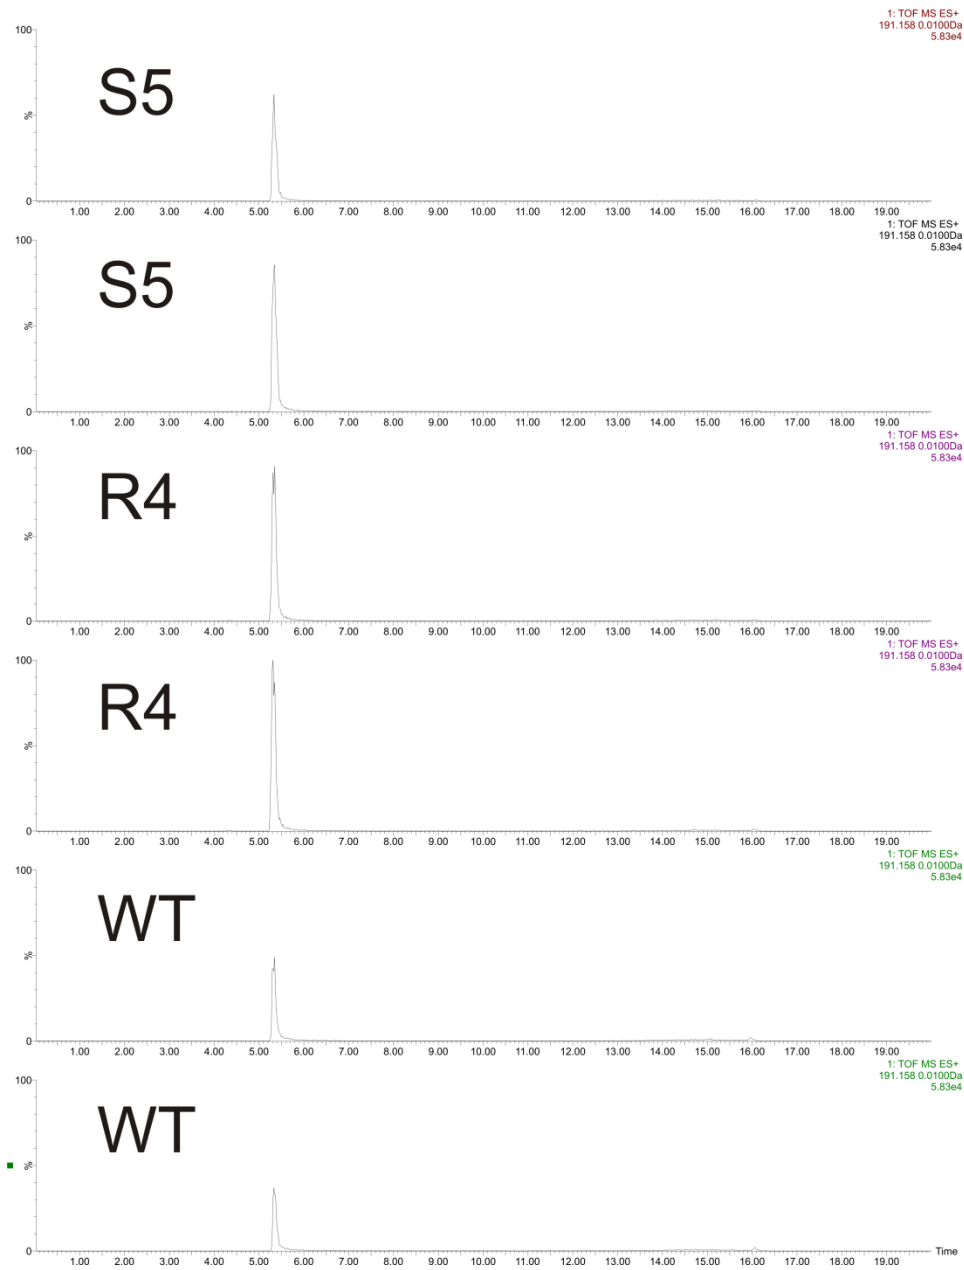

Figure S88. Extracted ion chromatograms for feature 16 w/  $\pm 0.01\text{Da}$  tolerance.

## D. Mass Spectral Data for Selected Features

### Feature 17 EIC ( $\pm 0.01\text{Da}$ )

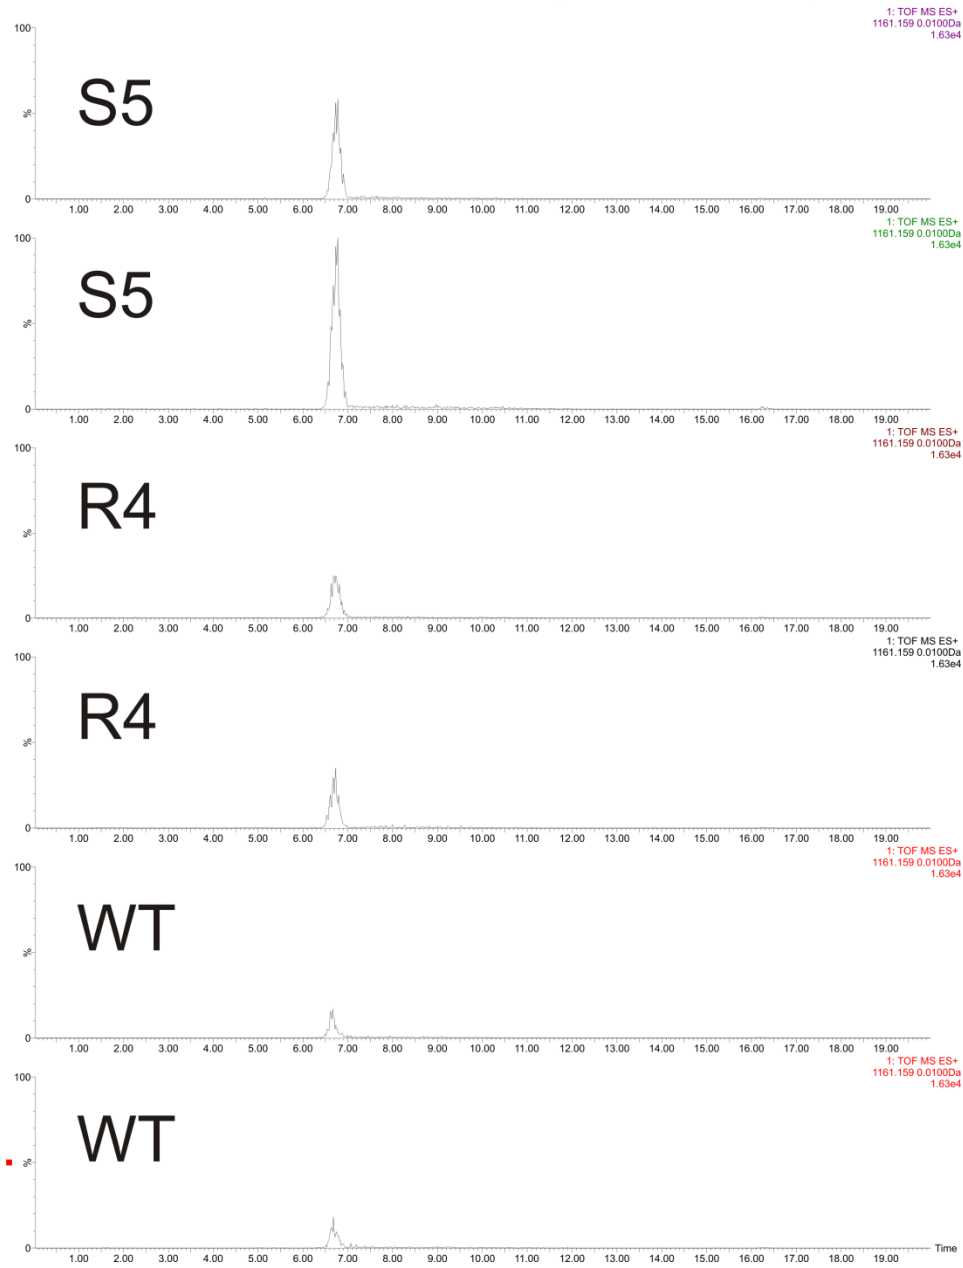

Figure S89. Extracted ion chromatograms for feature 17 w/  $\pm 0.01\text{Da}$  tolerance.

## D. Mass Spectral Data for Selected Features

# Feature 18 EIC ( $\pm 0.01\text{Da}$ )

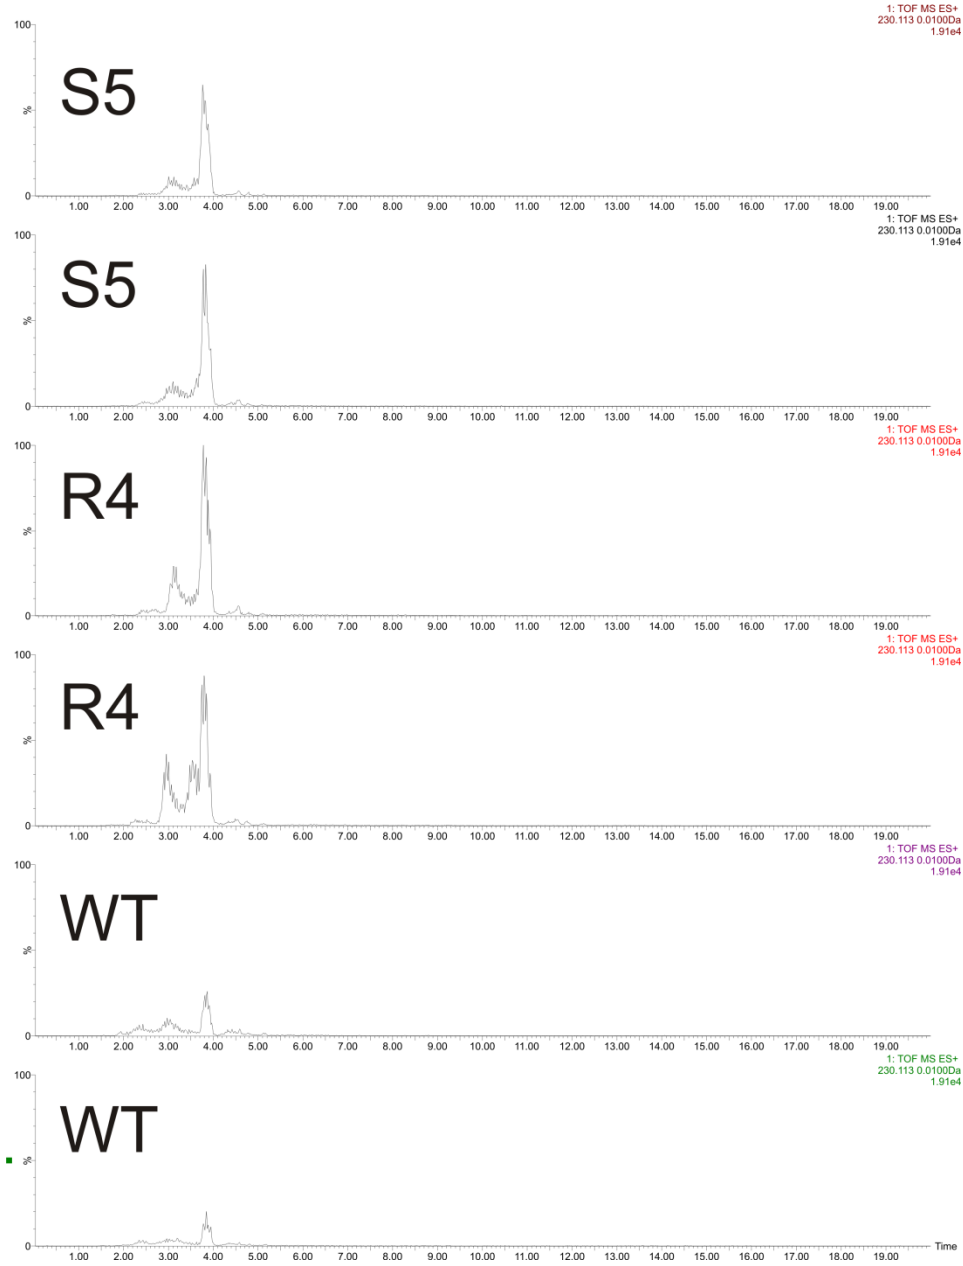

Figure S90. Extracted ion chromatograms for feature 18 w/  $\pm 0.01\text{Da}$  tolerance.



D. Mass Spectral Data for Selected Features

# Feature 19 EIC ( $\pm 0.01\text{Da}$ )

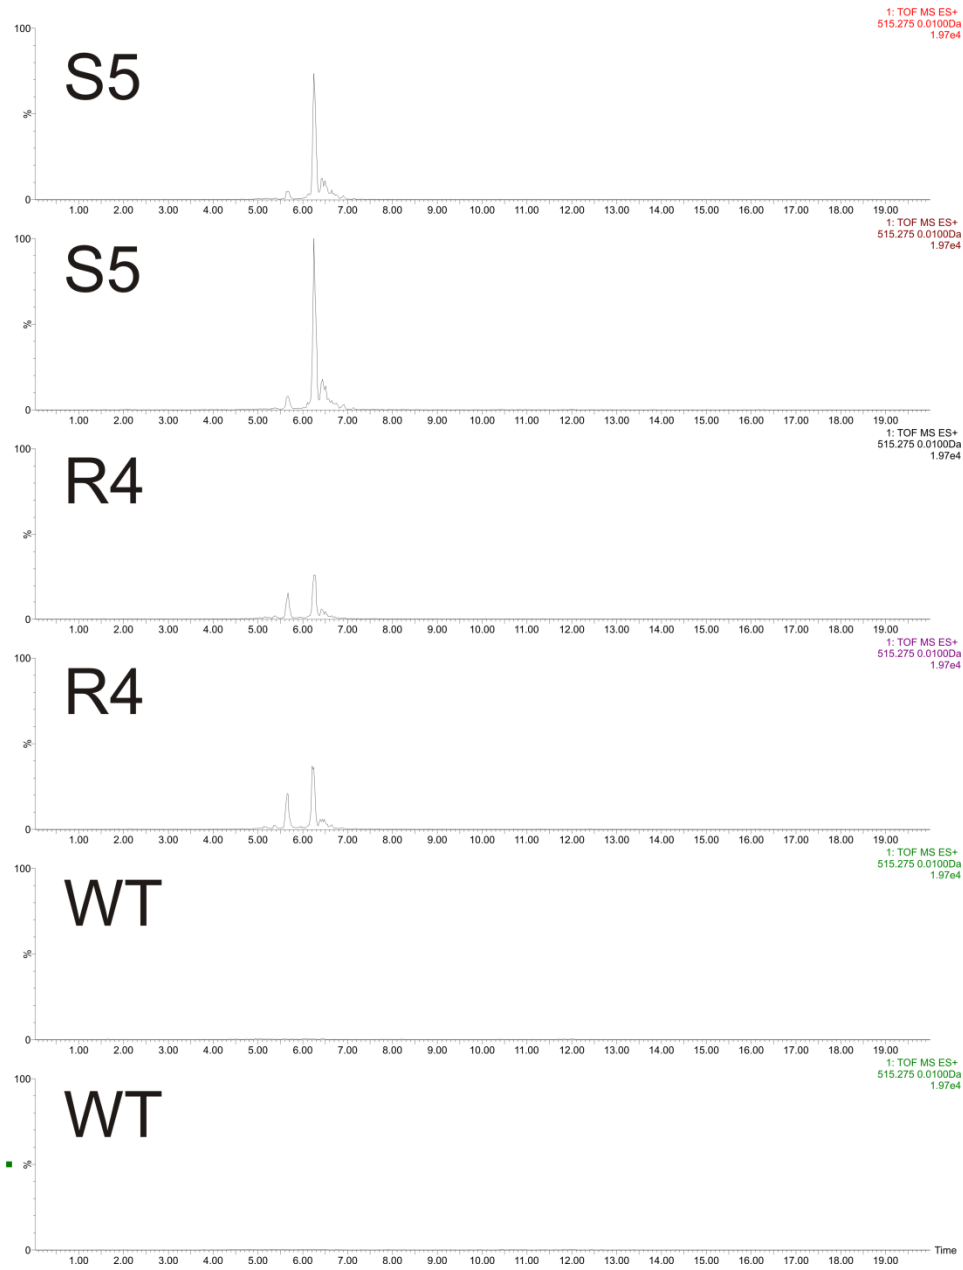

Figure S91. Extracted ion chromatograms for feature 19 w/  $\pm 0.01\text{Da}$  tolerance.

## D. Mass Spectral Data for Selected Features

### Feature 20 EIC ( $\pm 0.01\text{Da}$ )

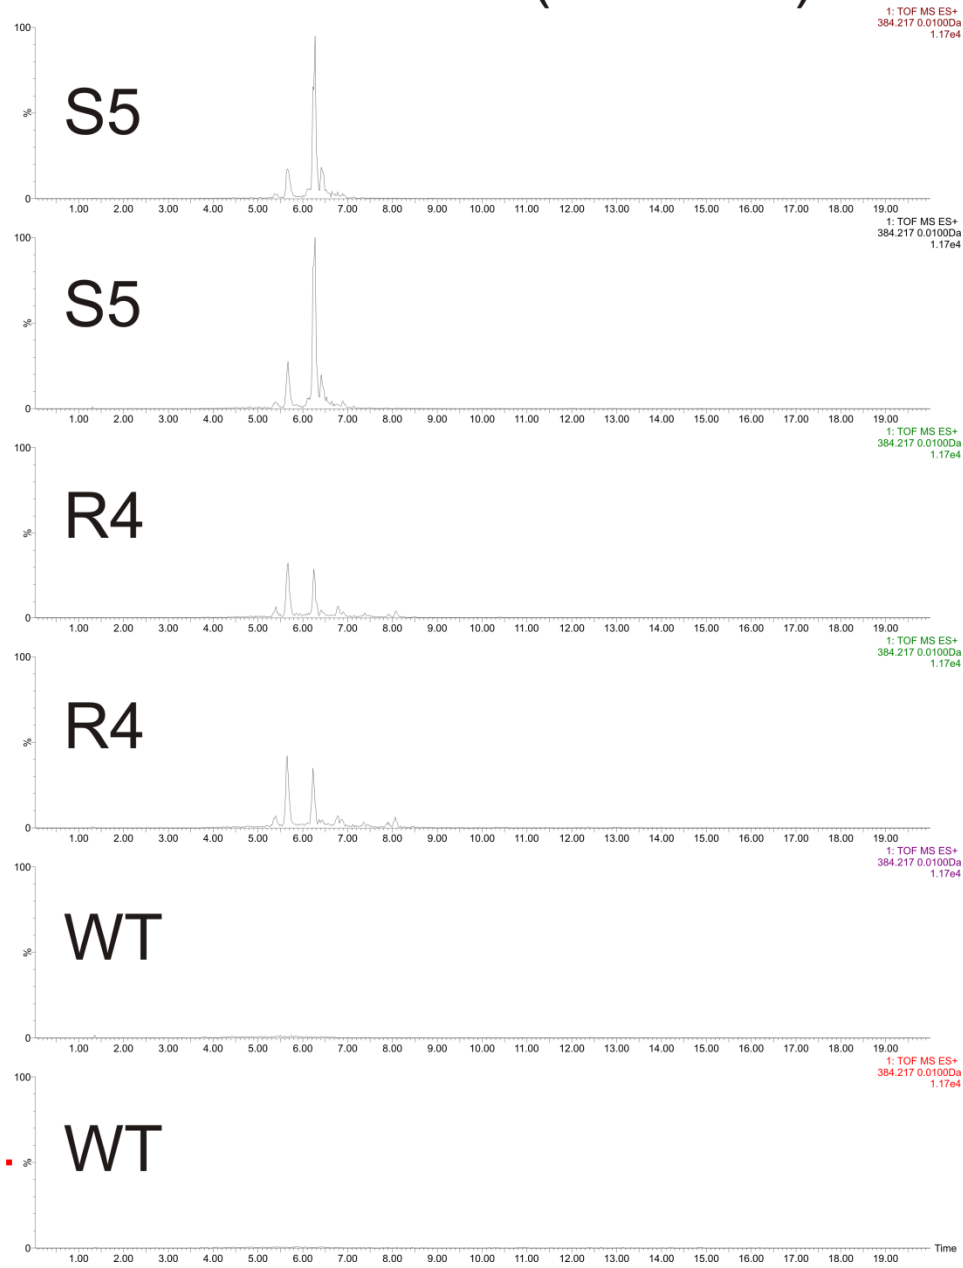

Figure S92. Extracted ion chromatograms for feature 20 w/  $\pm 0.01\text{Da}$  tolerance.

## D. Mass Spectral Data for Selected Features

### Feature 21 EIC ( $\pm 0.01\text{Da}$ )

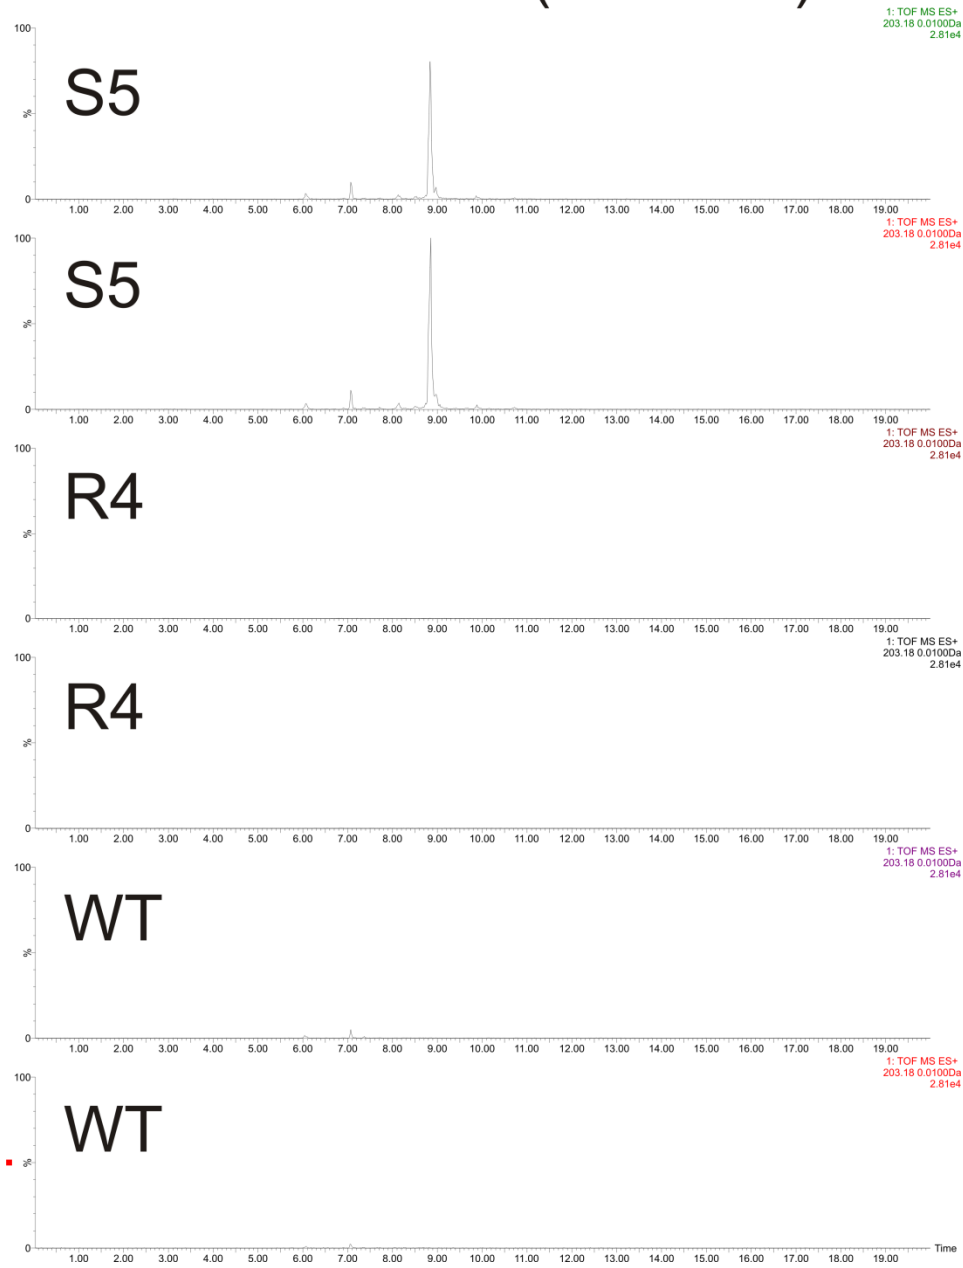

**Figure S93.** Extracted ion chromatograms for feature 21 w/  $\pm 0.01\text{Da}$  tolerance.

## D. Mass Spectral Data for Selected Features

### Feature 22 EIC ( $\pm 0.01\text{Da}$ )

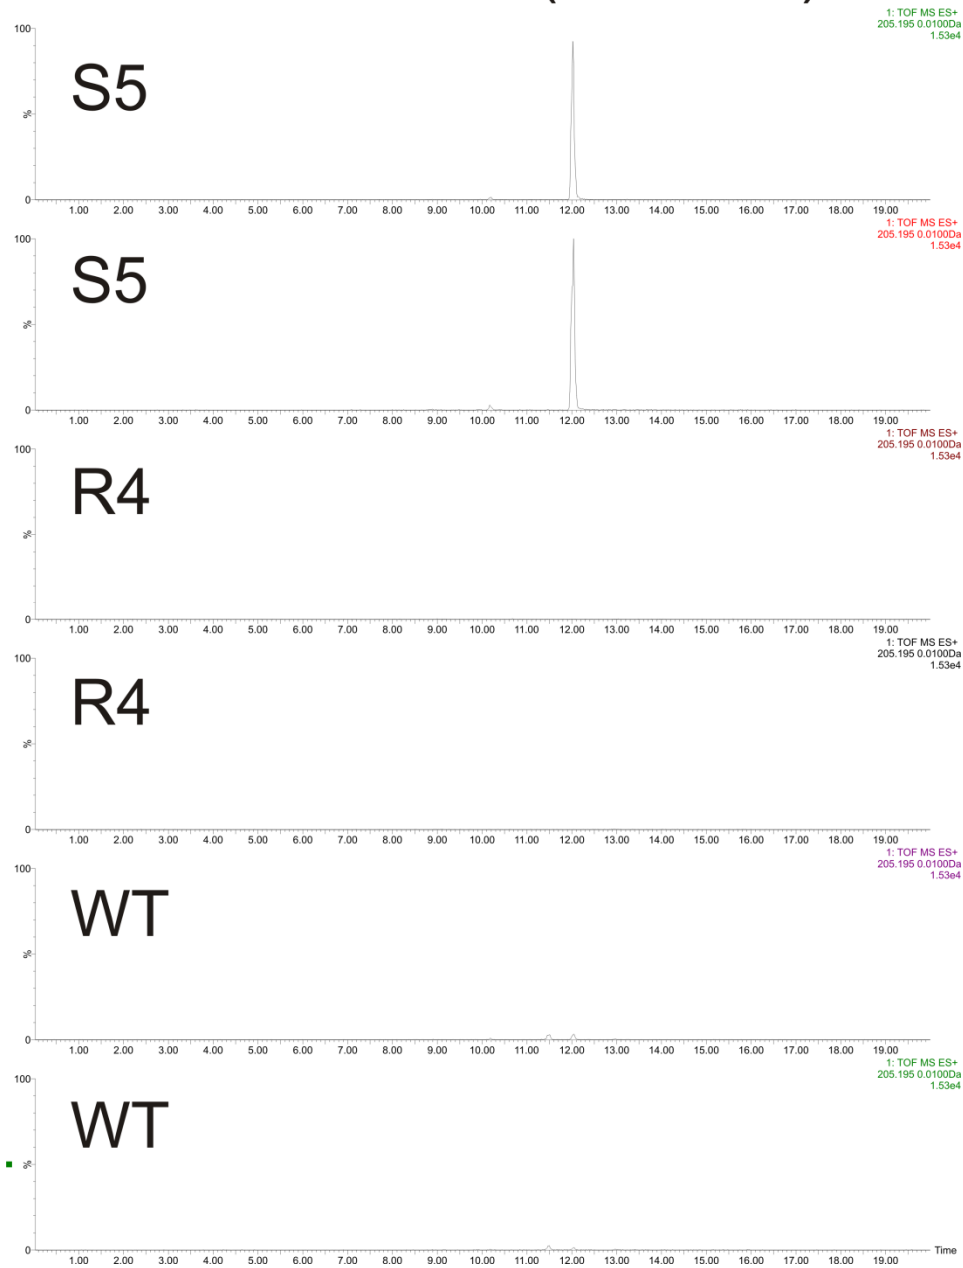

Figure S94. Extracted ion chromatograms for feature 22 w/  $\pm 0.01\text{Da}$  tolerance.

## D. Mass Spectral Data for Selected Features

# Feature 23 EIC ( $\pm 0.01\text{Da}$ )

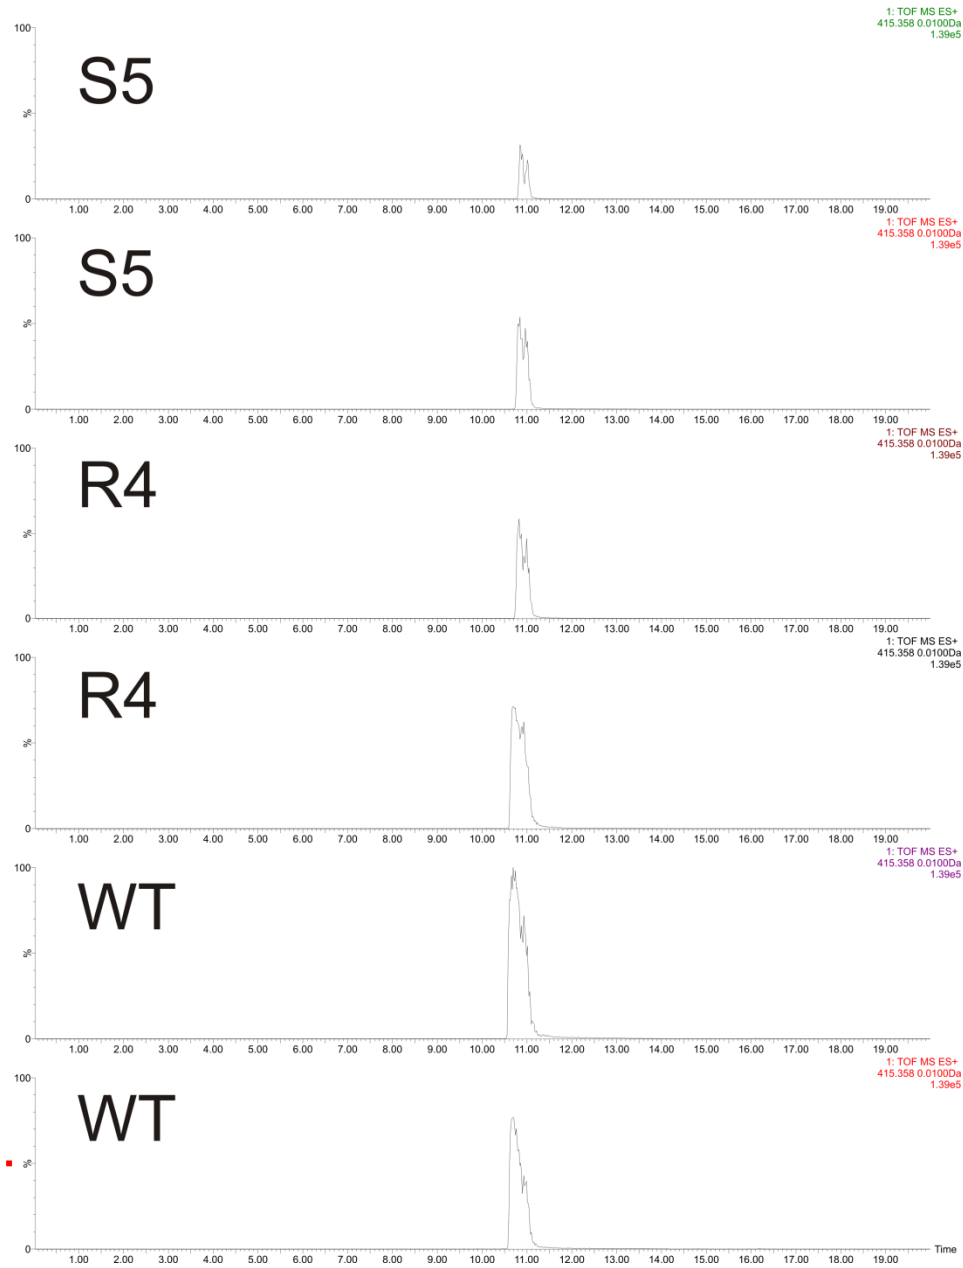

**Figure S95.** Extracted ion chromatograms for feature 23 w/  $\pm 0.01\text{Da}$  tolerance.

D. Mass Spectral Data for Selected Features

# Feature 24 EIC ( $\pm 0.01\text{Da}$ )

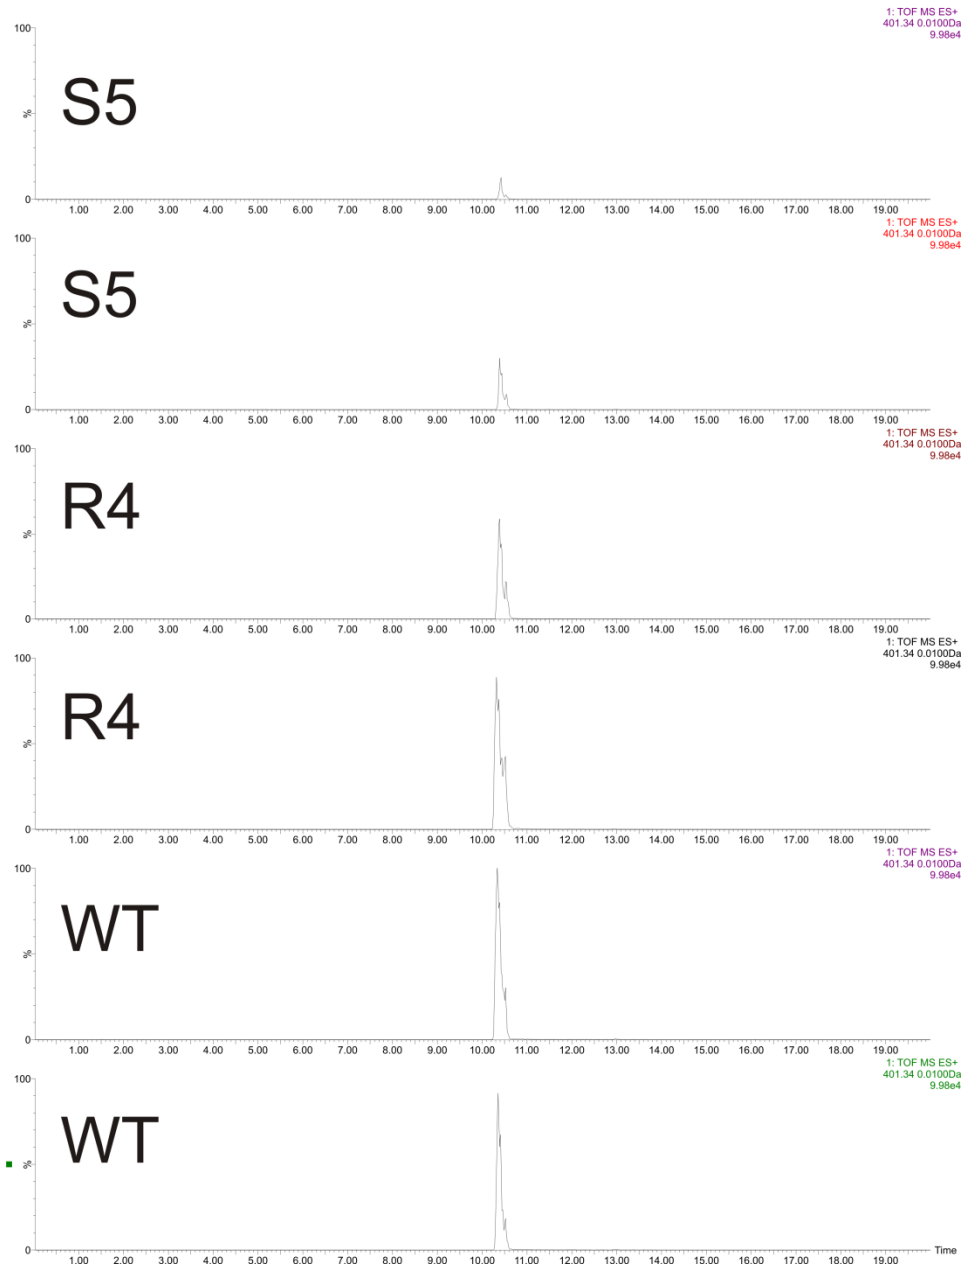

Figure S96. Extracted ion chromatograms for feature 24 w/  $\pm 0.01\text{Da}$  tolerance.

## D. Mass Spectral Data for Selected Features

# Feature 25 EIC ( $\pm 0.01\text{Da}$ )

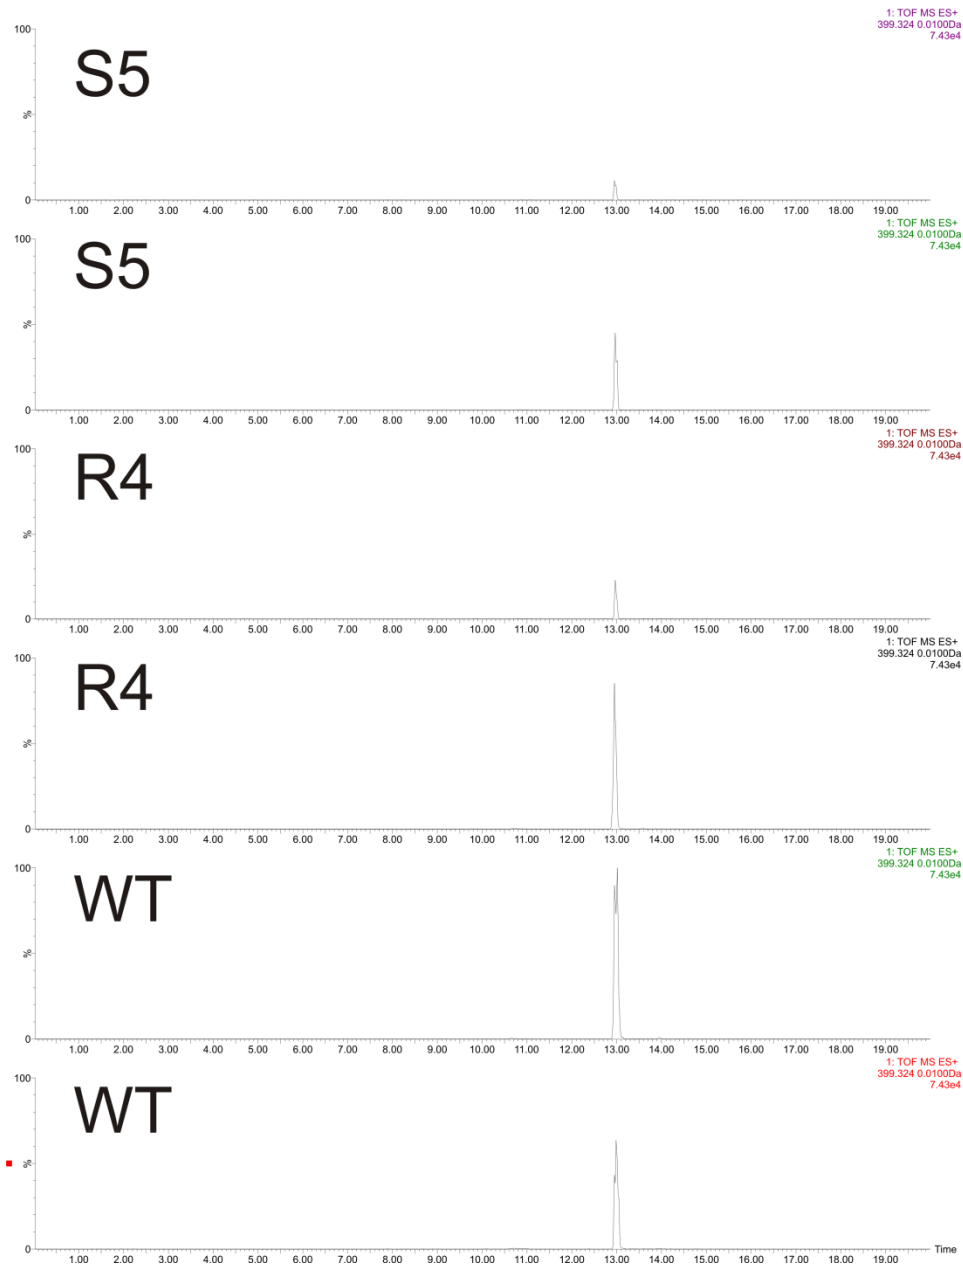

**Figure S97.** Extracted ion chromatograms for feature 25 w/  $\pm 0.01\text{Da}$  tolerance.

## D. Mass Spectral Data for Selected Features

# Feature 26 EIC ( $\pm 0.01\text{Da}$ )

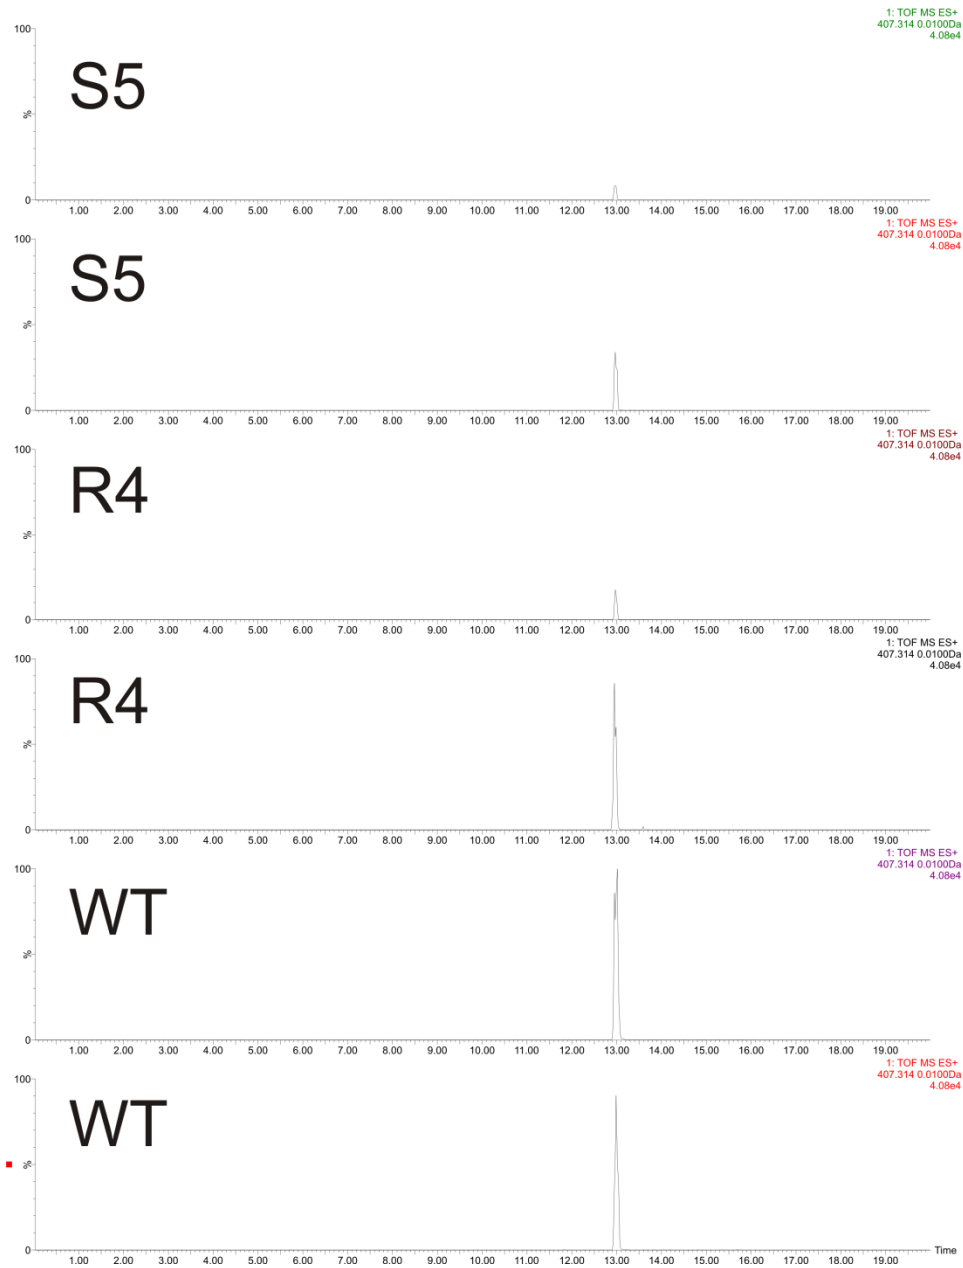

Figure S98. Extracted ion chromatograms for feature 26 w/  $\pm 0.01\text{Da}$  tolerance.



D. Mass Spectral Data for Selected Features

# Feature 27 EIC ( $\pm 0.01\text{Da}$ )

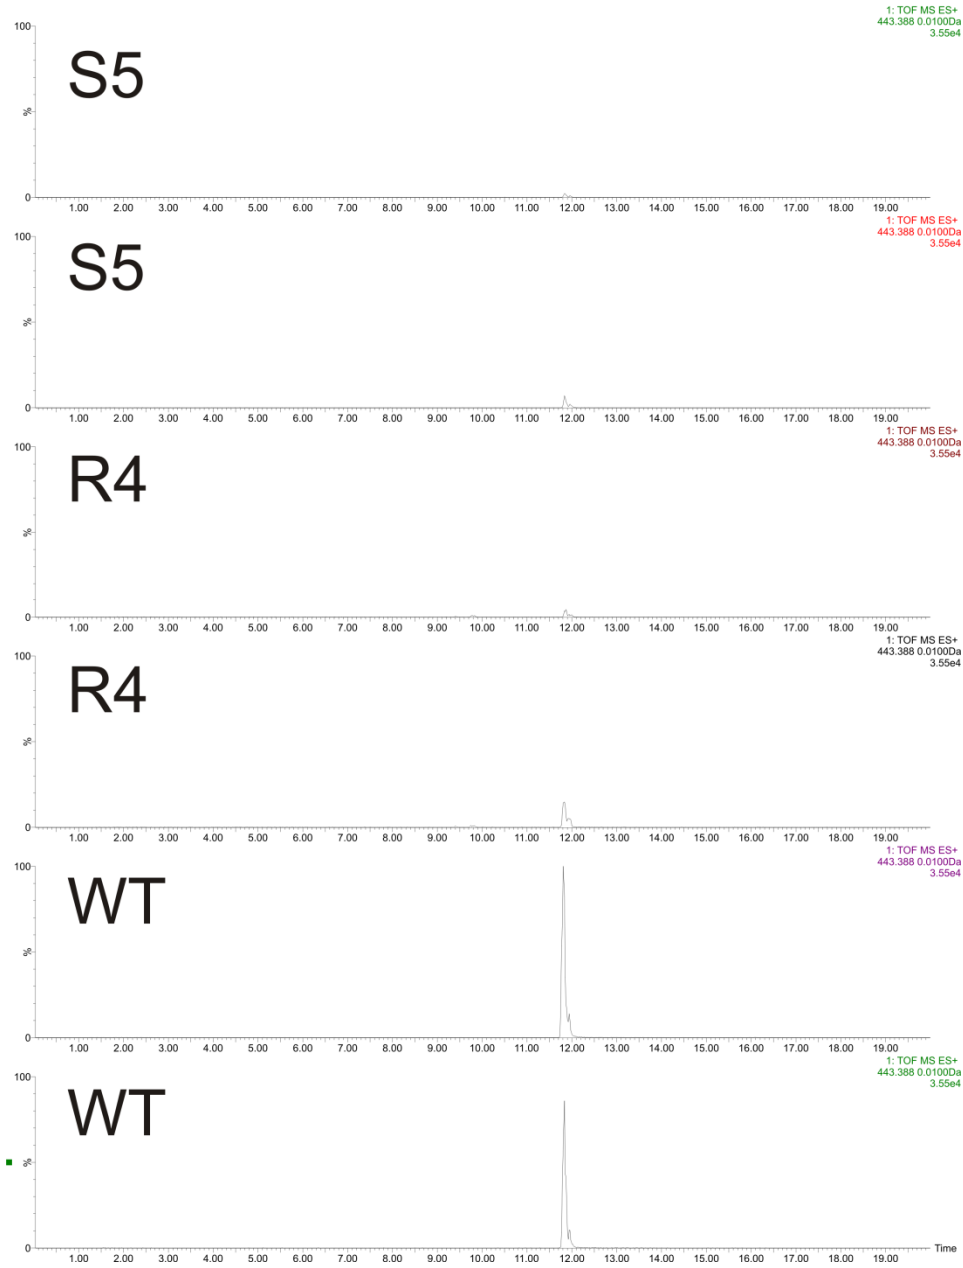

Figure S99. Extracted ion chromatograms for feature 27 w/  $\pm 0.01\text{Da}$  tolerance.

## D. Mass Spectral Data for Selected Features

**Table S7.** Normalized heat map of features described as unique in figure S4 when comparing *Bacillus subtilis* and *Micrococcus luteus* to *Escherichia coli* extracts using OPLS-DA and extracting features from the generated S-plot with correlation coefficients  $\geq 0.9$ . Features are normalized to maximum intensity for that feature.

| Feature ID (RT_m/z) | B sub | B sub | B sub | E coli | E coli | E coli | M lut | M lut | M lut |
|---------------------|-------|-------|-------|--------|--------|--------|-------|-------|-------|
| 1.59_136.0628       | 0.00  | 0.04  | 0.07  | 0.36   | 1.00   | 0.87   | 0.00  | 0.06  | 0.03  |
| 1.18_203.0538       | 0.00  | 0.22  | 0.00  | 1.00   | 0.71   | 0.75   | 0.00  | 0.01  | 0.00  |
| 8.87_225.1991       | 0.00  | 0.00  | 0.00  | 0.86   | 1.00   | 0.78   | 0.00  | 0.00  | 0.00  |
| 8.87_226.1249       | 0.00  | 0.00  | 0.00  | 1.00   | 0.95   | 0.88   | 0.00  | 0.00  | 0.00  |
| 6.33_243.0892       | 0.00  | 0.16  | 0.13  | 0.87   | 0.78   | 1.00   | 0.00  | 0.00  | 0.00  |
| 3.58_246.1339       | 0.00  | 0.00  | 0.02  | 0.68   | 0.79   | 1.00   | 0.00  | 0.02  | 0.00  |
| 1.23_258.1102       | 0.00  | 0.00  | 0.00  | 0.80   | 1.00   | 0.76   | 0.00  | 0.01  | 0.01  |
| 3.47_276.1486       | 0.00  | 0.00  | 0.00  | 0.95   | 1.00   | 0.64   | 0.00  | 0.00  | 0.00  |
| 1.16_280.0940       | 0.00  | 0.00  | 0.00  | 0.61   | 1.00   | 0.88   | 0.00  | 0.00  | 0.00  |
| 7.38_364.1685       | 0.00  | 0.00  | 0.00  | 1.00   | 0.79   | 0.52   | 0.00  | 0.01  | 0.00  |
| 8.87_392.1643       | 0.00  | 0.00  | 0.00  | 0.93   | 1.00   | 0.66   | 0.00  | 0.00  | 0.00  |
| 2.45_424.1838       | 0.00  | 0.00  | 0.00  | 0.74   | 1.00   | 0.64   | 0.00  | 0.00  | 0.00  |
| 3.59_438.1989       | 0.00  | 0.00  | 0.00  | 1.00   | 0.66   | 0.87   | 0.00  | 0.00  | 0.00  |
| 10.27_452.2766      | 0.00  | 0.00  | 0.00  | 0.50   | 0.81   | 1.00   | 0.00  | 0.00  | 0.00  |
| 2.41_442.1934       | 0.00  | 0.00  | 0.00  | 1.00   | 0.50   | 0.72   | 0.00  | 0.00  | 0.00  |
| 3.58_456.2096       | 0.00  | 0.00  | 0.01  | 1.00   | 0.69   | 0.88   | 0.00  | 0.00  | 0.00  |
| 10.91_466.2961      | 0.00  | 0.00  | 0.00  | 0.61   | 0.62   | 1.00   | 0.00  | 0.00  | 0.00  |
| 3.40_488.1789       | 0.00  | 0.00  | 0.00  | 1.00   | 0.40   | 0.69   | 0.02  | 0.00  | 0.02  |
| 11.83_494.3263      | 0.00  | 0.00  | 0.00  | 0.52   | 0.62   | 1.00   | 0.00  | 0.00  | 0.00  |
| 5.04_542.3153       | 0.00  | 0.00  | 0.00  | 1.00   | 0.91   | 0.92   | 0.01  | 0.00  | 0.00  |
| 3.37_604.2482       | 0.00  | 0.00  | 0.00  | 0.91   | 0.58   | 1.00   | 0.00  | 0.00  | 0.01  |
| 3.63_600.2512       | 0.00  | 0.00  | 0.00  | 0.56   | 0.57   | 1.00   | 0.01  | 0.00  | 0.02  |
| 1.19_723.1992       | 0.00  | 0.00  | 0.00  | 0.57   | 0.98   | 1.00   | 0.00  | 0.00  | 0.00  |
| 1.22_707.2229       | 0.00  | 0.00  | 0.00  | 1.00   | 0.80   | 0.93   | 0.00  | 0.00  | 0.00  |
| 14.78_742.5100      | 0.00  | 0.00  | 0.01  | 0.90   | 0.60   | 1.00   | 0.00  | 0.08  | 0.00  |
| 11.13_454.2957      | 0.00  | 0.00  | 0.00  | 0.56   | 0.91   | 1.00   | 0.00  | 0.00  | 0.00  |
| 10.68_466.2947      | 0.00  | 0.00  | 0.00  | 0.55   | 0.56   | 1.00   | 0.00  | 0.00  | 0.00  |
| 1.33_428.1800       | 0.00  | 0.01  | 0.00  | 0.93   | 0.82   | 1.00   | 0.00  | 0.00  | 0.00  |
| 7.37_226.1255       | 0.00  | 0.00  | 0.00  | 0.92   | 0.94   | 1.00   | 0.00  | 0.00  | 0.00  |
| 1.21_365.1089       | 0.00  | 0.00  | 0.00  | 0.77   | 1.00   | 0.89   | 0.00  | 0.00  | 0.00  |
| 4.33_260.1502       | 0.00  | 0.00  | 0.00  | 1.00   | 0.60   | 0.86   | 0.01  | 0.14  | 0.06  |
| 1.20_381.0798       | 0.01  | 0.00  | 0.00  | 1.00   | 0.83   | 0.94   | 0.00  | 0.00  | 0.00  |
| 1.13_380.0978       | 0.01  | 0.01  | 0.02  | 0.78   | 0.92   | 1.00   | 0.00  | 0.00  | 0.01  |
| 4.15_260.1506       | 0.02  | 0.00  | 0.00  | 1.00   | 0.51   | 0.99   | 0.00  | 0.01  | 0.00  |
| 3.50_230.1384       | 0.02  | 0.07  | 0.00  | 0.66   | 1.00   | 0.60   | 0.00  | 0.03  | 0.00  |
| 1.23_446.1908       | 0.03  | 0.00  | 0.00  | 0.99   | 0.85   | 1.00   | 0.00  | 0.00  | 0.00  |
| 4.29_447.2276       | 0.05  | 0.00  | 0.00  | 1.00   | 0.40   | 0.96   | 0.00  | 0.00  | 0.00  |
| 3.95_328.1408       | 0.06  | 0.09  | 0.00  | 0.83   | 1.00   | 0.63   | 0.01  | 0.07  | 0.08  |
| 5.25_164.0700       | 0.11  | 0.18  | 0.08  | 0.88   | 1.00   | 0.71   | 0.45  | 0.14  | 0.22  |
| 5.57_277.1177       | 0.16  | 0.12  | 0.11  | 0.86   | 0.98   | 1.00   | 0.07  | 0.01  | 0.12  |
| 6.91_233.0782       | 0.30  | 0.27  | 0.35  | 1.00   | 0.98   | 0.93   | 0.37  | 0.45  | 0.39  |
| 1.32_247.1405       | 0.38  | 0.77  | 1.00  | 0.04   | 0.00   | 0.00   | 0.67  | 0.77  | 0.84  |
| 5.24_374.2291       | 0.49  | 0.89  | 0.96  | 0.00   | 0.00   | 0.00   | 1.00  | 0.72  | 0.91  |
| 6.71_514.3211       | 0.52  | 0.77  | 0.64  | 0.00   | 0.00   | 0.00   | 1.00  | 0.65  | 0.80  |
| 5.31_489.2739       | 0.55  | 0.60  | 0.59  | 0.00   | 0.00   | 0.00   | 0.85  | 0.89  | 1.00  |
| 5.97_441.3089       | 0.56  | 0.52  | 0.53  | 0.05   | 0.05   | 0.02   | 1.00  | 0.81  | 0.86  |
| 6.93_527.2267       | 0.58  | 0.76  | 1.00  | 0.00   | 0.00   | 0.00   | 0.83  | 0.78  | 0.48  |
| 3.65_248.1052       | 0.62  | 0.76  | 0.66  | 0.00   | 0.00   | 0.08   | 0.89  | 1.00  | 0.51  |
| 7.20_340.2507       | 0.63  | 0.73  | 0.89  | 0.00   | 0.00   | 0.00   | 0.95  | 0.97  | 1.00  |
| 8.43_384.2770       | 0.64  | 0.47  | 0.60  | 0.00   | 0.00   | 0.00   | 0.88  | 1.00  | 0.71  |
| 8.74_340.2520       | 0.66  | 0.52  | 0.71  | 0.00   | 0.00   | 0.00   | 0.86  | 0.76  | 1.00  |
| 8.15_368.2806       | 0.66  | 0.47  | 0.57  | 0.00   | 0.00   | 0.00   | 0.87  | 1.00  | 0.91  |
| 5.48_287.1006       | 0.69  | 0.72  | 1.00  | 0.00   | 0.00   | 0.05   | 0.77  | 0.69  | 0.61  |
| 7.14_120.0804       | 0.69  | 0.84  | 0.88  | 0.01   | 0.01   | 0.02   | 1.00  | 0.88  | 0.81  |
| 8.16_386.2928       | 0.70  | 0.70  | 0.69  | 0.00   | 0.00   | 0.00   | 0.69  | 1.00  | 0.90  |
| 1.26_246.1797       | 0.70  | 0.99  | 0.82  | 0.02   | 0.00   | 0.00   | 0.89  | 0.99  | 1.00  |
| 7.49_358.2600       | 0.71  | 0.66  | 0.72  | 0.00   | 0.00   | 0.00   | 0.90  | 0.96  | 1.00  |
| 6.73_224.1250       | 0.71  | 0.83  | 0.75  | 0.02   | 0.00   | 0.00   | 1.00  | 0.67  | 0.97  |
| 5.17_188.0713       | 0.72  | 1.00  | 0.93  | 0.00   | 0.04   | 0.00   | 0.77  | 0.85  | 0.69  |

### D. Mass Spectral Data for Selected Features

|               |      |      |      |      |      |      |      |      |      |
|---------------|------|------|------|------|------|------|------|------|------|
| 6.72_406.2313 | 0.72 | 0.80 | 0.81 | 0.00 | 0.00 | 0.00 | 0.98 | 0.81 | 1.00 |
| 1.24_369.1533 | 0.77 | 1.00 | 0.86 | 0.00 | 0.00 | 0.00 | 0.66 | 0.71 | 0.87 |
| 7.59_517.3020 | 0.77 | 0.77 | 0.99 | 0.00 | 0.00 | 0.01 | 1.00 | 0.91 | 0.92 |
| 7.90_328.2507 | 0.77 | 0.54 | 0.61 | 0.00 | 0.00 | 0.00 | 0.98 | 1.00 | 0.75 |
| 1.05_341.1557 | 0.80 | 0.90 | 0.46 | 0.00 | 0.00 | 0.00 | 0.86 | 0.75 | 1.00 |
| 6.97_326.2351 | 0.81 | 0.64 | 0.75 | 0.00 | 0.01 | 0.00 | 0.87 | 1.00 | 1.00 |
| 1.05_323.1483 | 0.81 | 0.81 | 0.88 | 0.00 | 0.00 | 0.00 | 0.80 | 1.00 | 0.79 |
| 1.20_257.1491 | 0.81 | 0.44 | 0.64 | 0.05 | 0.04 | 0.00 | 0.96 | 1.00 | 0.74 |
| 7.13_236.1285 | 0.81 | 0.78 | 0.87 | 0.01 | 0.00 | 0.00 | 0.80 | 1.00 | 0.95 |
| 7.14_396.2770 | 0.81 | 0.69 | 0.85 | 0.00 | 0.00 | 0.00 | 0.98 | 1.00 | 0.79 |
| 7.20_358.2601 | 0.87 | 0.65 | 0.72 | 0.00 | 0.00 | 0.00 | 0.85 | 0.92 | 1.00 |
| 7.59_263.1407 | 0.87 | 0.64 | 0.88 | 0.00 | 0.00 | 0.00 | 1.00 | 0.89 | 0.73 |
| 6.07_159.0926 | 0.87 | 0.56 | 0.85 | 0.00 | 0.01 | 0.00 | 0.72 | 1.00 | 0.56 |
| 6.45_341.1501 | 0.90 | 0.63 | 0.86 | 0.02 | 0.02 | 0.03 | 0.80 | 0.99 | 1.00 |
| 6.94_227.1782 | 0.90 | 0.84 | 1.00 | 0.00 | 0.00 | 0.03 | 0.75 | 0.72 | 0.69 |
| 6.07_299.1768 | 0.90 | 0.83 | 1.00 | 0.00 | 0.00 | 0.00 | 0.81 | 0.62 | 0.67 |
| 6.96_300.1824 | 0.91 | 0.63 | 1.00 | 0.00 | 0.00 | 0.00 | 0.86 | 0.89 | 0.70 |
| 4.93_265.1574 | 0.92 | 0.66 | 0.89 | 0.01 | 0.00 | 0.00 | 0.86 | 0.80 | 1.00 |
| 5.09_245.1881 | 0.96 | 0.77 | 0.82 | 0.00 | 0.00 | 0.00 | 0.95 | 1.00 | 0.99 |
| 6.96_382.2573 | 0.96 | 0.78 | 0.73 | 0.00 | 0.00 | 0.00 | 0.76 | 0.96 | 1.00 |
| 6.08_201.1028 | 0.97 | 0.97 | 1.00 | 0.00 | 0.00 | 0.02 | 1.00 | 0.76 | 0.94 |
| 6.96_282.1702 | 0.99 | 0.70 | 0.94 | 0.00 | 0.00 | 0.00 | 0.86 | 0.99 | 1.00 |
| 7.14_258.1102 | 1.00 | 0.62 | 0.88 | 0.00 | 0.00 | 0.00 | 0.94 | 1.00 | 0.97 |
| 6.08_188.0708 | 1.00 | 0.80 | 0.58 | 0.01 | 0.02 | 0.00 | 0.54 | 1.00 | 0.99 |
| 3.90_186.0783 | 1.00 | 0.70 | 0.58 | 0.00 | 0.02 | 0.00 | 0.61 | 0.92 | 0.84 |
| 3.98_215.1417 | 1.00 | 0.60 | 0.80 | 0.00 | 0.00 | 0.00 | 0.57 | 0.88 | 0.62 |
| 5.42_245.1308 | 1.00 | 0.74 | 0.80 | 0.00 | 0.00 | 0.03 | 0.68 | 0.68 | 0.65 |
| 4.69_302.2081 | 1.00 | 0.95 | 0.90 | 0.02 | 0.00 | 0.00 | 0.93 | 0.87 | 0.75 |
| 6.71_327.0330 | 1.00 | 0.72 | 0.98 | 0.00 | 0.01 | 0.03 | 0.82 | 0.87 | 0.64 |
| 6.68_356.1087 | 1.00 | 0.86 | 0.92 | 0.00 | 0.00 | 0.00 | 0.95 | 0.92 | 0.76 |
| 6.76_393.1819 | 1.00 | 0.67 | 0.89 | 0.01 | 0.01 | 0.02 | 0.66 | 0.73 | 0.77 |
| 5.66_522.2907 | 1.00 | 0.62 | 0.92 | 0.00 | 0.00 | 0.00 | 0.93 | 0.98 | 0.92 |
| 5.40_613.3562 | 1.00 | 0.58 | 0.73 | 0.00 | 0.00 | 0.01 | 0.86 | 0.81 | 0.94 |
| 6.96_913.9555 | 1.00 | 0.81 | 0.92 | 0.00 | 0.00 | 0.00 | 0.55 | 0.91 | 0.98 |

## D. Mass Spectral Data for Selected Features

**Table S8.** Normalized heat map of features described as unique in figure S4 when comparing *Bacillus subtilis* and *Escherichia coli* to *Micrococcus luteus* extracts using OPLS-DA and extracting features from the generated S-plot with correlation coefficients  $\geq 0.9$ . Features are normalized to maximum intensity for that feature.

| Feature ID (RT_m/z) | B sub | B sub | B sub | E coli | E coli | E coli | M lut | M lut | M lut |
|---------------------|-------|-------|-------|--------|--------|--------|-------|-------|-------|
| 3.85_239.1416       | 0.00  | 0.09  | 0.00  | 0.00   | 0.00   | 0.01   | 1.00  | 0.59  | 0.88  |
| 5.44_316.2237       | 0.00  | 0.20  | 0.00  | 0.00   | 0.00   | 0.03   | 0.81  | 1.00  | 0.63  |
| 1.31_324.1312       | 0.00  | 0.10  | 0.21  | 0.00   | 0.00   | 0.00   | 0.98  | 1.00  | 0.54  |
| 5.57_322.1904       | 0.00  | 0.19  | 0.21  | 0.00   | 0.00   | 0.00   | 0.62  | 1.00  | 0.88  |
| 5.04_334.1767       | 0.00  | 0.00  | 0.00  | 0.00   | 0.00   | 0.50   | 1.00  | 0.80  | 0.77  |
| 5.69_349.7333       | 0.00  | 0.08  | 0.09  | 0.00   | 0.00   | 0.00   | 1.00  | 0.78  | 0.72  |
| 5.31_368.1632       | 0.00  | 0.00  | 0.00  | 0.30   | 0.00   | 0.00   | 0.73  | 1.00  | 0.57  |
| 9.55_400.1299       | 0.00  | 0.00  | 0.00  | 0.00   | 0.00   | 0.00   | 0.61  | 1.00  | 0.45  |
| 5.16_408.2509       | 0.00  | 0.00  | 0.00  | 0.13   | 0.00   | 0.03   | 0.80  | 1.00  | 0.86  |
| 5.02_407.2347       | 0.00  | 0.00  | 0.05  | 0.00   | 0.00   | 0.00   | 0.69  | 1.00  | 0.78  |
| 6.75_431.2681       | 0.00  | 0.00  | 0.31  | 0.00   | 0.00   | 0.00   | 0.90  | 0.96  | 1.00  |
| 5.75_749.3707       | 0.00  | 0.24  | 0.01  | 0.00   | 0.00   | 0.00   | 1.00  | 0.97  | 0.84  |
| 5.88_473.2311       | 0.01  | 0.03  | 0.03  | 0.00   | 0.00   | 0.00   | 0.96  | 1.00  | 0.75  |
| 5.45_764.4128       | 0.03  | 0.00  | 0.02  | 0.00   | 0.00   | 0.00   | 0.92  | 1.00  | 0.87  |
| 6.02_378.2402       | 0.04  | 0.36  | 0.25  | 0.00   | 0.00   | 0.02   | 1.00  | 0.73  | 0.70  |
| 5.58_291.6759       | 0.06  | 0.30  | 0.18  | 0.00   | 0.00   | 0.00   | 1.00  | 0.83  | 0.85  |
| 5.64_507.2827       | 0.06  | 0.00  | 0.16  | 0.00   | 0.00   | 0.01   | 0.84  | 0.81  | 1.00  |
| 10.32_317.2674      | 0.07  | 0.03  | 0.08  | 0.00   | 0.00   | 0.00   | 1.00  | 0.97  | 0.80  |
| 5.06_471.2746       | 0.10  | 0.04  | 0.04  | 0.00   | 0.00   | 0.00   | 1.00  | 0.47  | 0.82  |
| 5.64_360.2149       | 0.10  | 0.20  | 0.21  | 0.00   | 0.00   | 0.14   | 0.95  | 1.00  | 0.87  |
| 10.32_299.2598      | 0.12  | 0.05  | 0.10  | 0.00   | 0.00   | 0.00   | 1.00  | 0.63  | 0.66  |
| 5.18_423.2211       | 0.14  | 0.16  | 0.26  | 0.00   | 0.09   | 0.00   | 1.00  | 0.60  | 0.72  |
| 4.50_493.2325       | 0.15  | 0.28  | 0.28  | 0.00   | 0.13   | 0.00   | 1.00  | 0.82  | 0.86  |
| 5.58_582.3392       | 0.17  | 0.00  | 0.23  | 0.01   | 0.00   | 0.01   | 1.00  | 0.69  | 0.69  |
| 6.17_557.3688       | 0.18  | 0.10  | 0.19  | 0.00   | 0.00   | 0.01   | 1.00  | 0.80  | 0.96  |
| 6.11_734.3731       | 0.22  | 0.15  | 0.07  | 0.00   | 0.00   | 0.00   | 0.49  | 1.00  | 0.79  |
| 4.74_284.1566       | 0.23  | 0.38  | 0.12  | 0.14   | 0.19   | 0.04   | 0.69  | 1.00  | 0.65  |
| 5.88_378.2396       | 0.23  | 0.00  | 0.00  | 0.06   | 0.00   | 0.00   | 0.59  | 1.00  | 0.81  |
| 6.80_857.4155       | 0.28  | 0.00  | 0.26  | 0.00   | 0.00   | 0.00   | 0.98  | 0.86  | 1.00  |
| 8.64_342.2650       | 0.35  | 0.00  | 0.03  | 0.00   | 0.00   | 0.00   | 0.78  | 1.00  | 0.81  |
| 6.15_608.3295       | 0.39  | 0.35  | 0.18  | 0.00   | 0.00   | 0.01   | 1.00  | 0.87  | 0.98  |
| 6.00_288.0498       | 0.42  | 0.17  | 0.15  | 0.00   | 0.00   | 0.00   | 0.98  | 1.00  | 0.61  |
| 6.26_475.2939       | 0.42  | 0.09  | 0.37  | 0.08   | 0.00   | 0.00   | 0.90  | 0.90  | 1.00  |
| 5.50_374.2277       | 0.45  | 0.36  | 0.17  | 0.00   | 0.00   | 0.12   | 1.00  | 0.75  | 0.87  |

## D. Mass Spectral Data for Selected Features

**Table S9.** Normalized heat map of features described as unique in figure S4 when comparing *Bacillus subtilis* to *Micrococcus luteus* and *Escherichia coli* extracts using OPLS-DA and extracting features from the generated S-plot with correlation coefficients  $\geq 0.9$ . Features are normalized to maximum intensity for that feature.

| Feature ID (RT_m/z) | B sub | B sub | B sub | E coli | E coli | E coli | M lut | M lut | M lut |
|---------------------|-------|-------|-------|--------|--------|--------|-------|-------|-------|
| 4.42_357.1859       | 0.40  | 0.32  | 0.26  | 1.00   | 0.67   | 0.94   | 0.73  | 0.84  | 0.75  |
| 2.31_289.1405       | 0.62  | 1.00  | 0.56  | 0.02   | 0.00   | 0.00   | 0.33  | 0.12  | 0.00  |
| 3.38_271.1408       | 0.65  | 1.00  | 0.51  | 0.00   | 0.00   | 0.00   | 0.00  | 0.00  | 0.29  |
| 4.62_190.0525       | 0.67  | 1.00  | 0.69  | 0.00   | 0.00   | 0.08   | 0.03  | 0.24  | 0.17  |
| 5.71_441.7064       | 0.71  | 0.62  | 1.00  | 0.32   | 0.00   | 0.00   | 0.00  | 0.18  | 0.00  |
| 2.28_259.1292       | 0.74  | 1.00  | 0.59  | 0.00   | 0.00   | 0.05   | 0.22  | 0.00  | 0.08  |
| 4.49_201.1581       | 0.79  | 1.00  | 0.74  | 0.00   | 0.00   | 0.00   | 0.08  | 0.14  | 0.04  |
| 5.68_512.3435       | 0.88  | 1.00  | 0.98  | 0.00   | 0.00   | 0.01   | 0.02  | 0.15  | 0.19  |
| 8.21_272.1420       | 0.94  | 0.77  | 1.00  | 0.00   | 0.00   | 0.00   | 0.06  | 0.01  | 0.02  |
| 1.79_124.0404       | 1.00  | 0.85  | 0.84  | 0.07   | 0.10   | 0.00   | 0.28  | 0.50  | 0.18  |
| 8.29_223.1446       | 1.00  | 0.82  | 0.79  | 0.00   | 0.00   | 0.00   | 0.03  | 0.00  | 0.02  |
| 1.32_221.1124       | 1.00  | 0.69  | 0.94  | 0.02   | 0.00   | 0.00   | 0.46  | 0.00  | 0.08  |
| 6.22_246.1732       | 1.00  | 0.80  | 0.72  | 0.00   | 0.00   | 0.00   | 0.35  | 0.31  | 0.31  |
| 4.78_374.2088       | 1.00  | 0.88  | 0.91  | 0.00   | 0.00   | 0.00   | 0.42  | 0.43  | 0.00  |
| 4.69_431.2509       | 1.00  | 0.98  | 0.57  | 0.00   | 0.03   | 0.00   | 0.31  | 0.35  | 0.10  |

## D. Mass Spectral Data for Selected Features

**Table S10.** Normalized heat map of features described as unique in figure 2b and c when comparing wild type *Nocardiosis sp. FU40 ΔApoS8* to the R1 rifampicin resistant mutant extract using OPLS-DA and extracting features from the generated S-plot with correlation coefficients  $\geq 0.9$ . Features are normalized to maximum intensity for that feature.

| Feature ID (RT_m/z) | WT   | WT   | R1   | R1   |
|---------------------|------|------|------|------|
| 12.03_135.1163      | 0.00 | 0.11 | 0.93 | 1.00 |
| 12.03_123.1165      | 0.00 | 0.00 | 1.00 | 0.99 |
| 4.87_118.0679       | 0.00 | 0.20 | 0.64 | 1.00 |
| 1.50_103.5345       | 0.00 | 0.00 | 1.00 | 0.69 |
| 13.61_149.0907      | 0.00 | 0.00 | 1.00 | 0.97 |
| 1.50_165.0624       | 0.00 | 0.00 | 1.00 | 0.78 |
| 6.56_162.0938       | 0.00 | 0.00 | 0.73 | 1.00 |
| 4.31_160.1140       | 0.00 | 0.00 | 0.63 | 1.00 |
| 5.78_170.1204       | 0.00 | 0.00 | 0.80 | 1.00 |
| 7.08_169.0882       | 0.00 | 0.06 | 1.00 | 0.83 |
| 2.44_166.0747       | 0.00 | 0.20 | 0.81 | 1.00 |
| 6.60_180.1017       | 0.00 | 0.03 | 0.76 | 1.00 |
| 5.02_180.1014       | 0.00 | 0.00 | 0.88 | 1.00 |
| 10.70_179.1435      | 0.00 | 0.00 | 0.97 | 1.00 |
| 4.95_177.1399       | 0.00 | 0.29 | 0.67 | 1.00 |
| 4.39_192.1130       | 0.00 | 0.21 | 0.90 | 1.00 |
| 9.12_191.0134       | 0.00 | 0.00 | 0.76 | 1.00 |
| 4.02_198.1143       | 0.00 | 0.00 | 0.71 | 1.00 |
| 8.84_203.1804       | 0.00 | 0.00 | 0.75 | 1.00 |
| 6.22_203.0786       | 0.00 | 0.10 | 1.00 | 1.00 |
| 9.80_203.0277       | 0.00 | 0.00 | 0.70 | 1.00 |
| 7.49_207.0994       | 0.00 | 0.07 | 0.71 | 1.00 |
| 1.30_205.9283       | 0.00 | 0.00 | 1.00 | 1.00 |
| 4.84_205.1323       | 0.00 | 0.00 | 0.68 | 1.00 |
| 9.81_205.1237       | 0.00 | 0.00 | 0.92 | 1.00 |
| 10.22_205.1232      | 0.00 | 0.00 | 0.92 | 1.00 |
| 1.32_211.8786       | 0.00 | 0.00 | 1.00 | 0.60 |
| 9.81_210.0363       | 0.00 | 0.00 | 0.77 | 1.00 |
| 5.35_210.0350       | 0.00 | 0.00 | 0.64 | 1.00 |
| 10.24_222.1533      | 0.00 | 0.00 | 1.00 | 0.96 |
| 9.81_222.1504       | 0.00 | 0.00 | 0.87 | 1.00 |
| 8.84_221.1903       | 0.00 | 0.00 | 0.73 | 1.00 |
| 7.99_225.1125       | 0.00 | 0.07 | 0.95 | 1.00 |
| 5.48_229.0656       | 0.00 | 0.00 | 0.73 | 1.00 |
| 4.61_230.0715       | 0.00 | 0.38 | 1.00 | 0.94 |
| 10.62_236.1643      | 0.00 | 0.00 | 1.00 | 0.83 |
| 5.11_236.1306       | 0.00 | 0.25 | 1.00 | 0.86 |
| 8.54_235.1344       | 0.00 | 0.00 | 0.80 | 1.00 |
| 11.28_233.1548      | 0.00 | 0.00 | 0.95 | 1.00 |
| 9.80_241.0261       | 0.00 | 0.00 | 0.70 | 1.00 |
| 11.75_239.1663      | 0.00 | 0.01 | 1.00 | 0.90 |
| 10.69_238.1826      | 0.00 | 0.00 | 1.00 | 1.00 |
| 5.81_248.1281       | 0.00 | 0.32 | 0.77 | 1.00 |
| 11.16_252.0381      | 0.00 | 0.00 | 1.00 | 0.60 |
| 13.78_251.2405      | 0.00 | 0.00 | 0.48 | 1.00 |
| 11.26_250.1814      | 0.00 | 0.00 | 1.00 | 0.91 |
| 4.56_252.0394       | 0.00 | 0.18 | 0.72 | 1.00 |
| 8.66_252.0394       | 0.00 | 0.00 | 0.47 | 1.00 |
| 7.48_252.0388       | 0.00 | 0.00 | 1.00 | 0.65 |
| 6.82_252.0384       | 0.00 | 0.00 | 1.00 | 0.57 |
| 3.87_257.1146       | 0.00 | 0.29 | 0.97 | 1.00 |
| 12.02_263.1978      | 0.00 | 0.09 | 0.94 | 1.00 |
| 1.78_262.1278       | 0.00 | 0.00 | 1.00 | 0.73 |
| 5.86_262.1048       | 0.00 | 0.32 | 0.66 | 1.00 |
| 10.71_261.1779      | 0.00 | 0.01 | 0.77 | 1.00 |
| 10.68_260.1641      | 0.00 | 0.00 | 0.98 | 1.00 |
| 5.43_268.0192       | 0.00 | 0.12 | 0.61 | 1.00 |
| 5.18_266.1406       | 0.00 | 0.33 | 0.76 | 1.00 |
| 5.27_264.2082       | 0.00 | 0.00 | 0.79 | 1.00 |
| 5.84_281.1328       | 0.00 | 0.00 | 0.63 | 1.00 |
| 9.12_279.1585       | 0.00 | 0.00 | 1.00 | 0.84 |
| 7.18_278.2110       | 0.00 | 0.00 | 0.60 | 1.00 |
| 13.60_278.2028      | 0.00 | 0.00 | 0.93 | 1.00 |
| 7.50_283.1523       | 0.00 | 0.04 | 0.65 | 1.00 |

## D. Mass Spectral Data for Selected Features

|                |      |      |      |      |
|----------------|------|------|------|------|
| 1.73_282.0649  | 0.00 | 0.03 | 1.00 | 0.92 |
| 7.72_281.1420  | 0.00 | 0.00 | 1.00 | 0.91 |
| 7.82_294.2085  | 0.00 | 0.00 | 0.75 | 1.00 |
| 7.15_293.2251  | 0.00 | 0.00 | 0.71 | 1.00 |
| 3.76_299.1387  | 0.00 | 0.05 | 0.68 | 1.00 |
| 4.74_298.0969  | 0.00 | 0.08 | 0.90 | 1.00 |
| 9.60_297.1694  | 0.00 | 0.01 | 0.46 | 1.00 |
| 7.19_296.2224  | 0.00 | 0.00 | 0.82 | 1.00 |
| 3.78_300.1386  | 0.00 | 0.33 | 0.74 | 1.00 |
| 14.29_307.2281 | 0.00 | 0.00 | 1.00 | 0.82 |
| 8.43_314.1381  | 0.00 | 0.29 | 1.00 | 0.89 |
| 7.24_312.2197  | 0.00 | 0.00 | 0.98 | 1.00 |
| 5.82_322.1007  | 0.00 | 0.00 | 0.78 | 1.00 |
| 1.74_322.0446  | 0.00 | 0.03 | 1.00 | 0.72 |
| 14.63_321.2420 | 0.00 | 0.00 | 1.00 | 0.89 |
| 9.13_319.1539  | 0.00 | 0.00 | 1.00 | 0.68 |
| 6.08_324.1828  | 0.00 | 0.42 | 0.79 | 1.00 |
| 10.73_340.1475 | 0.00 | 0.19 | 1.00 | 1.00 |
| 14.63_339.2533 | 0.00 | 0.00 | 1.00 | 0.90 |
| 14.31_347.2205 | 0.00 | 0.00 | 1.00 | 0.82 |
| 5.26_354.0787  | 0.00 | 0.16 | 0.69 | 1.00 |
| 8.24_352.2057  | 0.00 | 0.00 | 1.00 | 0.84 |
| 6.95_350.2147  | 0.00 | 0.05 | 1.00 | 0.93 |
| 8.53_359.2035  | 0.00 | 0.25 | 0.80 | 1.00 |
| 9.80_367.0822  | 0.00 | 0.00 | 0.60 | 1.00 |
| 6.22_366.2068  | 0.00 | 0.36 | 0.76 | 1.00 |
| 14.32_379.2817 | 0.00 | 0.00 | 1.00 | 0.61 |
| 9.80_387.0731  | 0.00 | 0.00 | 0.72 | 1.00 |
| 6.24_384.2171  | 0.00 | 0.00 | 0.75 | 1.00 |
| 13.61_399.3201 | 0.00 | 0.00 | 1.00 | 0.57 |
| 1.49_394.1142  | 0.00 | 0.00 | 1.00 | 0.58 |
| 14.57_393.2988 | 0.00 | 0.00 | 0.76 | 1.00 |
| 13.61_407.3140 | 0.00 | 0.00 | 1.00 | 0.69 |
| 3.75_414.2692  | 0.00 | 0.00 | 0.64 | 1.00 |
| 9.08_429.0845  | 0.00 | 0.00 | 1.00 | 0.92 |
| 14.04_428.3345 | 0.00 | 0.07 | 0.79 | 1.00 |
| 14.04_420.3477 | 0.00 | 0.05 | 0.78 | 1.00 |
| 6.99_443.3240  | 0.00 | 0.12 | 0.66 | 1.00 |
| 9.73_443.1014  | 0.00 | 0.00 | 0.83 | 1.00 |
| 10.02_459.0960 | 0.00 | 0.00 | 0.57 | 1.00 |
| 11.52_456.3791 | 0.00 | 0.00 | 1.00 | 0.88 |
| 9.81_454.0847  | 0.00 | 0.00 | 0.86 | 1.00 |
| 9.78_481.0499  | 0.00 | 0.00 | 1.00 | 0.98 |
| 6.98_499.2793  | 0.00 | 0.00 | 1.00 | 0.74 |
| 4.37_494.2617  | 0.00 | 0.00 | 0.82 | 1.00 |
| 9.09_512.3013  | 0.00 | 0.00 | 0.91 | 1.00 |
| 13.62_510.2556 | 0.00 | 0.03 | 1.00 | 0.94 |
| 12.00_515.2832 | 0.00 | 0.00 | 1.00 | 1.00 |
| 1.76_515.1445  | 0.00 | 0.00 | 0.84 | 1.00 |
| 1.49_527.1567  | 0.00 | 0.00 | 1.00 | 0.64 |
| 10.06_526.3139 | 0.00 | 0.00 | 0.84 | 1.00 |
| 7.20_544.2918  | 0.00 | 0.00 | 1.00 | 0.66 |
| 12.03_565.3746 | 0.00 | 0.04 | 1.00 | 0.99 |
| 1.72_551.1035  | 0.00 | 0.00 | 1.00 | 0.66 |
| 5.52_601.2501  | 0.00 | 0.00 | 0.53 | 1.00 |
| 1.76_588.1814  | 0.00 | 0.00 | 0.54 | 1.00 |
| 9.79_576.6021  | 0.00 | 0.00 | 0.60 | 1.00 |
| 7.01_1221.4414 | 0.00 | 0.00 | 0.67 | 1.00 |
| 7.00_1216.1209 | 0.00 | 0.43 | 0.97 | 1.00 |
| 14.64_361.2361 | 0.00 | 0.00 | 1.00 | 0.86 |
| 7.48_177.0877  | 0.01 | 0.00 | 0.55 | 1.00 |
| 9.79_218.0234  | 0.01 | 0.08 | 0.72 | 1.00 |
| 1.82_228.1004  | 0.01 | 0.00 | 1.00 | 0.70 |
| 1.29_203.9309  | 0.01 | 0.00 | 1.00 | 0.96 |
| 1.75_507.1572  | 0.02 | 0.00 | 0.70 | 1.00 |
| 9.66_279.1583  | 0.02 | 0.00 | 0.72 | 1.00 |
| 9.78_465.0808  | 0.02 | 0.06 | 0.88 | 1.00 |
| 9.81_269.0437  | 0.03 | 0.00 | 0.73 | 1.00 |
| 6.95_368.2220  | 0.03 | 0.05 | 0.97 | 1.00 |
| 13.79_531.4249 | 0.03 | 0.10 | 0.80 | 1.00 |

## D. Mass Spectral Data for Selected Features

|                |      |      |      |      |
|----------------|------|------|------|------|
| 16.15_710.1773 | 0.03 | 0.01 | 1.00 | 0.90 |
| 12.02_205.1953 | 0.04 | 0.00 | 0.94 | 1.00 |
| 5.43_377.1482  | 0.04 | 0.00 | 0.67 | 1.00 |
| 14.31_325.2414 | 0.04 | 0.03 | 1.00 | 0.81 |
| 9.41_281.1770  | 0.04 | 0.08 | 0.81 | 1.00 |
| 9.67_319.1539  | 0.04 | 0.06 | 1.00 | 0.93 |
| 6.24_515.2753  | 0.04 | 0.02 | 0.78 | 1.00 |
| 4.75_136.0625  | 0.05 | 0.00 | 0.68 | 1.00 |
| 13.79_365.2675 | 0.05 | 0.06 | 1.00 | 0.67 |
| 8.60_236.1631  | 0.05 | 0.11 | 0.69 | 1.00 |
| 1.74_150.0789  | 0.06 | 0.00 | 1.00 | 0.95 |
| 8.53_283.1523  | 0.06 | 0.13 | 0.72 | 1.00 |
| 9.14_239.1284  | 0.06 | 0.06 | 1.00 | 0.73 |
| 14.78_323.2583 | 0.07 | 0.13 | 1.00 | 0.83 |
| 1.73_338.0231  | 0.07 | 0.00 | 1.00 | 0.66 |
| 8.53_177.0880  | 0.07 | 0.07 | 0.66 | 1.00 |
| 3.86_150.0940  | 0.07 | 0.13 | 0.61 | 1.00 |
| 6.95_218.1203  | 0.07 | 0.15 | 0.69 | 1.00 |
| 8.53_207.1002  | 0.07 | 0.09 | 0.69 | 1.00 |
| 14.04_295.2283 | 0.08 | 0.15 | 1.00 | 0.86 |
| 1.70_260.1135  | 0.10 | 0.00 | 1.00 | 0.70 |
| 7.42_280.1237  | 0.11 | 0.31 | 0.64 | 1.00 |
| 11.43_466.2973 | 0.12 | 0.35 | 1.00 | 0.78 |
| 6.27_207.0660  | 0.12 | 0.22 | 0.74 | 1.00 |
| 7.89_192.1015  | 0.13 | 0.22 | 0.69 | 1.00 |
| 3.07_230.1126  | 0.13 | 0.31 | 1.00 | 0.81 |
| 6.41_165.0905  | 0.13 | 0.09 | 0.72 | 1.00 |
| 8.29_401.1993  | 0.14 | 0.00 | 0.73 | 1.00 |
| 4.87_329.1844  | 0.14 | 0.00 | 0.72 | 1.00 |
| 4.88_188.0708  | 0.15 | 0.26 | 0.68 | 1.00 |
| 14.41_309.2409 | 0.16 | 0.29 | 1.00 | 0.85 |
| 3.83_198.1623  | 0.17 | 0.12 | 0.62 | 1.00 |
| 3.85_276.1433  | 0.18 | 0.10 | 0.67 | 1.00 |
| 7.42_196.0651  | 0.18 | 0.09 | 0.69 | 1.00 |
| 4.30_310.1305  | 0.19 | 0.04 | 0.73 | 1.00 |
| 9.47_211.0868  | 0.19 | 0.33 | 0.69 | 1.00 |
| 5.27_685.1761  | 0.20 | 0.00 | 0.84 | 1.00 |
| 3.82_230.1126  | 0.21 | 0.13 | 0.61 | 1.00 |
| 13.84_397.2963 | 0.22 | 0.00 | 1.00 | 0.86 |
| 8.08_219.1411  | 0.22 | 0.32 | 0.75 | 1.00 |
| 6.78_176.0714  | 0.22 | 0.37 | 0.69 | 1.00 |
| 16.18_335.9929 | 0.28 | 0.00 | 0.83 | 1.00 |
| 13.50_409.7445 | 0.30 | 0.38 | 0.84 | 1.00 |
| 6.15_485.2027  | 0.37 | 0.39 | 0.67 | 1.00 |
| 12.62_416.2462 | 0.37 | 0.45 | 1.00 | 0.88 |
| 9.69_220.1127  | 0.40 | 0.47 | 0.98 | 1.00 |
| 16.15_481.1090 | 0.42 | 0.00 | 0.89 | 1.00 |
| 14.82_332.2940 | 0.43 | 0.28 | 1.00 | 0.85 |
| 4.29_244.1199  | 0.45 | 0.46 | 0.78 | 1.00 |
| 5.16_210.1137  | 0.45 | 0.44 | 0.70 | 1.00 |
| 12.40_251.2372 | 0.47 | 0.00 | 1.00 | 0.98 |
| 11.97_299.2600 | 0.49 | 0.61 | 1.00 | 0.91 |
| 10.60_346.3091 | 0.51 | 1.00 | 0.00 | 0.00 |
| 10.40_371.3275 | 0.52 | 1.00 | 0.00 | 0.00 |
| 10.70_288.2557 | 0.52 | 1.00 | 0.00 | 0.00 |
| 6.40_439.1986  | 0.52 | 0.52 | 0.90 | 1.00 |
| 9.48_225.1993  | 0.53 | 1.00 | 0.01 | 0.02 |
| 6.81_807.1918  | 0.54 | 1.00 | 0.00 | 0.00 |
| 4.26_669.2631  | 0.56 | 1.00 | 0.00 | 0.00 |
| 11.80_235.1712 | 0.56 | 1.00 | 0.00 | 0.00 |
| 4.09_573.1785  | 0.58 | 1.00 | 0.00 | 0.00 |
| 4.37_663.2850  | 0.59 | 1.00 | 0.00 | 0.00 |
| 5.20_239.1759  | 0.62 | 1.00 | 0.10 | 0.12 |
| 4.64_412.2067  | 0.62 | 1.00 | 0.00 | 0.14 |
| 6.19_181.1351  | 0.63 | 1.00 | 0.05 | 0.05 |
| 1.50_432.0982  | 0.66 | 1.00 | 0.13 | 0.00 |
| 4.27_647.2871  | 0.67 | 1.00 | 0.04 | 0.00 |
| 1.50_448.0831  | 0.67 | 1.00 | 0.14 | 0.00 |
| 11.44_223.2060 | 0.67 | 1.00 | 0.00 | 0.00 |
| 7.62_970.6124  | 0.70 | 1.00 | 0.00 | 0.00 |



### D. Mass Spectral Data for Selected Features

|                |      |      |      |      |
|----------------|------|------|------|------|
| 6.85_824.9348  | 0.70 | 1.00 | 0.00 | 0.00 |
| 16.15_442.8736 | 0.71 | 1.00 | 0.00 | 0.00 |
| 7.07_184.1710  | 0.72 | 1.00 | 0.00 | 0.00 |
| 4.37_150.0945  | 0.72 | 1.00 | 0.00 | 0.00 |
| 3.89_518.1743  | 0.73 | 1.00 | 0.03 | 0.00 |
| 11.18_473.3585 | 0.75 | 1.00 | 0.52 | 0.41 |
| 1.53_143.0837  | 0.76 | 1.00 | 0.00 | 0.00 |
| 12.74_443.3505 | 0.77 | 1.00 | 0.00 | 0.07 |
| 12.98_282.2118 | 0.82 | 1.00 | 0.00 | 0.14 |
| 3.86_242.1126  | 0.82 | 0.90 | 1.00 | 1.00 |
| 9.26_219.1735  | 0.88 | 1.00 | 0.00 | 0.00 |
| 4.50_359.1197  | 0.89 | 1.00 | 0.24 | 0.28 |
| 1.49_594.1582  | 0.91 | 1.00 | 0.66 | 0.45 |
| 15.94_338.3442 | 0.91 | 1.00 | 0.78 | 0.80 |
| 13.48_341.2200 | 0.91 | 1.00 | 0.00 | 0.00 |
| 13.49_295.2258 | 0.91 | 1.00 | 0.14 | 0.08 |
| 1.47_508.0657  | 0.91 | 1.00 | 0.47 | 0.19 |
| 1.50_260.0296  | 0.92 | 1.00 | 0.12 | 0.06 |
| 1.47_748.1127  | 0.94 | 1.00 | 0.66 | 0.51 |
| 12.73_320.2010 | 0.94 | 1.00 | 0.00 | 0.30 |
| 1.48_481.1031  | 0.96 | 1.00 | 0.70 | 0.43 |
| 4.49_225.1597  | 0.97 | 1.00 | 0.20 | 0.23 |
| 13.95_270.2746 | 1.00 | 1.00 | 0.52 | 0.66 |
| 3.99_164.0936  | 1.00 | 0.90 | 0.39 | 0.60 |
| 1.50_230.0720  | 1.00 | 0.75 | 0.52 | 0.27 |
| 9.27_240.2315  | 1.00 | 0.88 | 0.17 | 0.15 |
| 10.39_268.2627 | 1.00 | 0.83 | 0.00 | 0.00 |
| 6.59_273.1670  | 1.00 | 0.84 | 0.00 | 0.21 |
| 13.97_282.2786 | 1.00 | 0.85 | 0.67 | 0.58 |
| 3.80_288.1929  | 1.00 | 0.87 | 0.00 | 0.00 |
| 11.44_291.1951 | 1.00 | 0.75 | 0.00 | 0.00 |
| 11.33_299.2599 | 1.00 | 0.77 | 0.00 | 0.00 |
| 15.49_338.3442 | 1.00 | 0.86 | 0.18 | 0.00 |
| 1.55_385.5441  | 1.00 | 0.65 | 0.22 | 0.05 |
| 1.50_401.0693  | 1.00 | 0.93 | 0.73 | 0.51 |
| 12.86_485.3471 | 1.00 | 0.86 | 0.66 | 0.44 |
| 13.92_641.5490 | 1.00 | 0.85 | 0.00 | 0.00 |
| 4.37_685.2548  | 1.00 | 0.86 | 0.00 | 0.30 |
| 7.66_916.7249  | 1.00 | 0.76 | 0.00 | 0.00 |

## D. Mass Spectral Data for Selected Features

**Table S11.** Normalized heat map of features described as unique in figure 2b and c when comparing wild type *Nocardiosis sp. FU40 ΔApoS8* to the R2 rifampicin resistant mutant extract using OPLS-DA and extracting features from the generated S-plot with correlation coefficients  $\geq 0.9$ . Features are normalized to maximum intensity for that feature.

| Feature ID (RT_m/z) | WT   | WT   | R2   | R2   |
|---------------------|------|------|------|------|
| 12.03_135.1163      | 0.00 | 0.31 | 0.69 | 1.00 |
| 12.03_123.1165      | 0.00 | 0.00 | 1.00 | 0.65 |
| 4.87_118.0679       | 0.00 | 0.18 | 1.00 | 1.00 |
| 12.03_149.1327      | 0.00 | 0.00 | 1.00 | 0.61 |
| 13.61_149.0907      | 0.00 | 0.00 | 1.00 | 0.91 |
| 1.50_165.0624       | 0.00 | 0.00 | 1.00 | 0.98 |
| 10.69_163.6058      | 0.00 | 0.00 | 1.00 | 0.67 |
| 6.56_162.0938       | 0.00 | 0.00 | 0.66 | 1.00 |
| 5.78_170.1204       | 0.00 | 0.00 | 1.00 | 1.00 |
| 7.08_169.0882       | 0.00 | 0.01 | 0.62 | 1.00 |
| 6.60_180.1017       | 0.00 | 0.03 | 1.00 | 0.91 |
| 5.02_180.1014       | 0.00 | 0.00 | 1.00 | 0.86 |
| 4.95_177.1399       | 0.00 | 0.38 | 1.00 | 0.94 |
| 4.39_192.1130       | 0.00 | 0.26 | 0.80 | 1.00 |
| 9.26_191.1250       | 0.00 | 0.00 | 1.00 | 0.74 |
| 9.12_191.0134       | 0.00 | 0.00 | 1.00 | 0.88 |
| 6.97_190.1257       | 0.00 | 0.00 | 1.00 | 0.80 |
| 4.14_186.1168       | 0.00 | 0.00 | 0.95 | 1.00 |
| 9.08_196.0187       | 0.00 | 0.00 | 1.00 | 0.68 |
| 8.84_203.1804       | 0.00 | 0.00 | 1.00 | 0.90 |
| 8.12_203.1781       | 0.00 | 0.00 | 1.00 | 0.94 |
| 9.08_203.0278       | 0.00 | 0.00 | 1.00 | 0.72 |
| 9.80_203.0277       | 0.00 | 0.00 | 1.00 | 0.72 |
| 9.42_202.0393       | 0.00 | 0.00 | 0.75 | 1.00 |
| 4.35_209.0956       | 0.00 | 0.00 | 0.82 | 1.00 |
| 5.44_208.0539       | 0.00 | 0.01 | 1.00 | 0.97 |
| 7.49_207.0994       | 0.00 | 0.10 | 1.00 | 0.75 |
| 1.30_205.9283       | 0.00 | 0.00 | 1.00 | 1.00 |
| 4.84_205.1323       | 0.00 | 0.00 | 1.00 | 0.91 |
| 1.32_211.8786       | 0.00 | 0.00 | 1.00 | 0.98 |
| 9.25_211.0284       | 0.00 | 0.04 | 1.00 | 0.81 |
| 8.31_210.0369       | 0.00 | 0.00 | 1.00 | 0.59 |
| 9.81_210.0363       | 0.00 | 0.00 | 1.00 | 0.76 |
| 9.07_210.0305       | 0.00 | 0.00 | 1.00 | 0.86 |
| 9.41_219.0312       | 0.00 | 0.00 | 1.00 | 0.77 |
| 9.03_217.0413       | 0.00 | 0.00 | 1.00 | 0.82 |
| 16.16_223.9875      | 0.00 | 0.00 | 1.00 | 0.84 |
| 8.84_221.1903       | 0.00 | 0.00 | 1.00 | 0.93 |
| 6.51_220.1710       | 0.00 | 0.07 | 0.97 | 1.00 |
| 5.15_226.5984       | 0.00 | 0.03 | 1.00 | 0.86 |
| 7.35_225.1140       | 0.00 | 0.00 | 1.00 | 0.89 |
| 7.99_225.1125       | 0.00 | 0.02 | 1.00 | 0.94 |
| 9.04_225.0298       | 0.00 | 0.01 | 1.00 | 0.79 |
| 9.77_224.0325       | 0.00 | 0.00 | 1.00 | 0.83 |
| 5.48_229.0656       | 0.00 | 0.00 | 0.97 | 1.00 |
| 5.11_227.1386       | 0.00 | 0.00 | 1.00 | 0.99 |
| 9.19_230.0719       | 0.00 | 0.00 | 1.00 | 0.69 |
| 9.82_230.0718       | 0.00 | 0.03 | 0.79 | 1.00 |
| 8.41_230.0715       | 0.00 | 0.00 | 1.00 | 0.90 |
| 10.62_236.1643      | 0.00 | 0.00 | 1.00 | 0.82 |
| 5.11_236.1306       | 0.00 | 0.17 | 1.00 | 0.92 |
| 8.54_235.1344       | 0.00 | 0.00 | 1.00 | 0.88 |
| 9.80_241.0261       | 0.00 | 0.00 | 1.00 | 0.85 |
| 8.82_241.0249       | 0.00 | 0.00 | 0.72 | 1.00 |
| 5.81_248.1281       | 0.00 | 0.36 | 0.99 | 1.00 |
| 9.03_248.0351       | 0.00 | 0.00 | 1.00 | 0.83 |
| 8.44_247.1345       | 0.00 | 0.00 | 0.75 | 1.00 |
| 4.04_247.1287       | 0.00 | 0.00 | 1.00 | 0.88 |
| 7.33_247.0943       | 0.00 | 0.11 | 1.00 | 0.94 |
| 9.07_246.5440       | 0.00 | 0.00 | 1.00 | 0.83 |
| 5.04_244.1219       | 0.00 | 0.00 | 1.00 | 0.91 |
| 11.26_250.1814      | 0.00 | 0.00 | 1.00 | 0.82 |
| 4.94_250.1290       | 0.00 | 0.00 | 1.00 | 0.93 |
| 8.52_250.0297       | 0.00 | 0.00 | 1.00 | 0.94 |

## D. Mass Spectral Data for Selected Features

|                |      |      |      |      |
|----------------|------|------|------|------|
| 4.31_249.0807  | 0.00 | 0.00 | 1.00 | 0.87 |
| 8.16_249.0423  | 0.00 | 0.00 | 1.00 | 0.80 |
| 4.56_252.0394  | 0.00 | 0.13 | 0.90 | 1.00 |
| 6.01_252.0391  | 0.00 | 0.00 | 1.00 | 0.84 |
| 6.82_252.0384  | 0.00 | 0.00 | 1.00 | 0.82 |
| 6.23_258.1449  | 0.00 | 0.00 | 1.00 | 0.86 |
| 6.94_256.2241  | 0.00 | 0.00 | 1.00 | 0.89 |
| 4.75_255.5956  | 0.00 | 0.28 | 1.00 | 0.83 |
| 6.97_254.2139  | 0.00 | 0.00 | 1.00 | 0.86 |
| 9.81_253.5524  | 0.00 | 0.01 | 1.00 | 0.86 |
| 4.75_263.0841  | 0.00 | 0.16 | 1.00 | 0.81 |
| 1.78_262.1278  | 0.00 | 0.00 | 1.00 | 0.73 |
| 9.91_261.5430  | 0.00 | 0.00 | 0.52 | 1.00 |
| 5.01_261.1438  | 0.00 | 0.06 | 1.00 | 0.94 |
| 9.03_260.5527  | 0.00 | 0.00 | 1.00 | 0.64 |
| 8.32_268.0180  | 0.00 | 0.00 | 1.00 | 0.94 |
| 10.77_267.1616 | 0.00 | 0.06 | 0.55 | 1.00 |
| 5.18_266.1406  | 0.00 | 0.37 | 1.00 | 0.82 |
| 5.27_264.2082  | 0.00 | 0.00 | 1.00 | 0.80 |
| 7.49_268.0200  | 0.00 | 0.00 | 1.00 | 0.68 |
| 9.67_268.0195  | 0.00 | 0.00 | 1.00 | 0.74 |
| 7.61_273.1085  | 0.00 | 0.00 | 1.00 | 0.84 |
| 5.84_281.1328  | 0.00 | 0.00 | 1.00 | 0.97 |
| 7.18_278.2110  | 0.00 | 0.00 | 1.00 | 0.88 |
| 6.07_276.1943  | 0.00 | 0.00 | 1.00 | 0.79 |
| 5.71_286.2118  | 0.00 | 0.00 | 1.00 | 0.83 |
| 7.19_284.2219  | 0.00 | 0.00 | 0.86 | 1.00 |
| 12.79_284.1681 | 0.00 | 0.05 | 1.00 | 0.98 |
| 7.50_283.1523  | 0.00 | 0.05 | 1.00 | 0.92 |
| 1.73_282.0649  | 0.00 | 0.03 | 1.00 | 0.94 |
| 7.72_281.1420  | 0.00 | 0.00 | 0.83 | 1.00 |
| 3.93_291.1653  | 0.00 | 0.00 | 1.00 | 0.83 |
| 9.72_290.1445  | 0.00 | 0.00 | 0.99 | 1.00 |
| 7.06_287.2336  | 0.00 | 0.00 | 0.93 | 1.00 |
| 5.22_295.1312  | 0.00 | 0.03 | 0.87 | 1.00 |
| 6.82_294.2084  | 0.00 | 0.00 | 1.00 | 0.82 |
| 7.15_293.2251  | 0.00 | 0.00 | 1.00 | 0.65 |
| 4.87_293.1612  | 0.00 | 0.35 | 1.00 | 0.91 |
| 6.49_292.1923  | 0.00 | 0.01 | 0.96 | 1.00 |
| 3.76_299.1387  | 0.00 | 0.00 | 0.54 | 1.00 |
| 2.95_299.1385  | 0.00 | 0.00 | 1.00 | 0.90 |
| 12.77_298.1902 | 0.00 | 0.00 | 0.95 | 1.00 |
| 4.74_298.0969  | 0.00 | 0.06 | 0.99 | 1.00 |
| 7.19_296.2224  | 0.00 | 0.00 | 1.00 | 0.92 |
| 5.83_303.1558  | 0.00 | 0.04 | 0.65 | 1.00 |
| 7.70_303.1206  | 0.00 | 0.04 | 1.00 | 0.99 |
| 3.78_300.1386  | 0.00 | 0.05 | 1.00 | 0.78 |
| 12.02_309.1921 | 0.00 | 0.06 | 1.00 | 0.80 |
| 6.00_308.2238  | 0.00 | 0.00 | 1.00 | 0.83 |
| 8.43_314.1381  | 0.00 | 0.21 | 1.00 | 0.60 |
| 6.06_312.2197  | 0.00 | 0.00 | 0.92 | 1.00 |
| 6.84_312.2197  | 0.00 | 0.00 | 1.00 | 0.91 |
| 7.24_312.2197  | 0.00 | 0.00 | 1.00 | 0.81 |
| 9.72_312.1580  | 0.00 | 0.00 | 1.00 | 0.77 |
| 10.59_311.1859 | 0.00 | 0.00 | 1.00 | 0.72 |
| 9.79_311.0549  | 0.00 | 0.00 | 1.00 | 0.92 |
| 7.47_310.2026  | 0.00 | 0.00 | 0.84 | 1.00 |
| 5.82_322.1007  | 0.00 | 0.00 | 1.00 | 0.87 |
| 1.74_322.0446  | 0.00 | 0.03 | 1.00 | 0.96 |
| 9.13_319.1539  | 0.00 | 0.00 | 1.00 | 0.83 |
| 6.92_318.2094  | 0.00 | 0.00 | 1.00 | 0.93 |
| 6.00_328.7423  | 0.00 | 0.13 | 1.00 | 0.93 |
| 5.91_328.5999  | 0.00 | 0.00 | 1.00 | 0.92 |
| 6.01_326.2353  | 0.00 | 0.00 | 0.95 | 1.00 |
| 4.97_326.0999  | 0.00 | 0.34 | 1.00 | 0.77 |
| 6.08_324.1828  | 0.00 | 0.23 | 1.00 | 0.93 |
| 6.31_335.7452  | 0.00 | 0.00 | 1.00 | 0.80 |
| 6.62_334.2005  | 0.00 | 0.00 | 1.00 | 0.80 |
| 9.73_334.1684  | 0.00 | 0.00 | 1.00 | 0.77 |
| 8.76_329.1942  | 0.00 | 0.19 | 0.99 | 1.00 |

## D. Mass Spectral Data for Selected Features

|                |      |      |      |      |
|----------------|------|------|------|------|
| 12.72_342.2152 | 0.00 | 0.10 | 1.00 | 0.86 |
| 5.99_338.1374  | 0.00 | 0.00 | 0.88 | 1.00 |
| 9.08_348.2310  | 0.00 | 0.00 | 1.00 | 0.77 |
| 6.22_346.2031  | 0.00 | 0.00 | 0.71 | 1.00 |
| 7.48_345.1875  | 0.00 | 0.00 | 1.00 | 0.85 |
| 7.37_344.2218  | 0.00 | 0.00 | 1.00 | 0.84 |
| 9.69_356.1867  | 0.00 | 0.00 | 1.00 | 0.85 |
| 5.26_354.0787  | 0.00 | 0.28 | 0.97 | 1.00 |
| 8.24_352.2057  | 0.00 | 0.00 | 1.00 | 0.88 |
| 12.66_364.2323 | 0.00 | 0.28 | 1.00 | 0.74 |
| 6.67_362.2335  | 0.00 | 0.00 | 0.97 | 1.00 |
| 6.51_360.2165  | 0.00 | 0.00 | 1.00 | 0.89 |
| 8.53_359.2035  | 0.00 | 0.18 | 1.00 | 0.87 |
| 8.77_368.2219  | 0.00 | 0.00 | 1.00 | 0.92 |
| 7.52_368.2211  | 0.00 | 0.00 | 1.00 | 0.87 |
| 9.80_367.0822  | 0.00 | 0.00 | 1.00 | 0.96 |
| 10.08_366.2455 | 0.00 | 0.00 | 1.00 | 0.72 |
| 9.04_366.2404  | 0.00 | 0.00 | 1.00 | 0.83 |
| 6.22_366.2068  | 0.00 | 0.12 | 0.76 | 1.00 |
| 5.64_366.2063  | 0.00 | 0.00 | 0.91 | 1.00 |
| 8.47_382.2398  | 0.00 | 0.00 | 1.00 | 0.75 |
| 9.68_378.2012  | 0.00 | 0.00 | 1.00 | 0.72 |
| 7.43_374.2181  | 0.00 | 0.00 | 0.61 | 1.00 |
| 7.83_387.1861  | 0.00 | 0.00 | 1.00 | 0.94 |
| 9.80_387.0731  | 0.00 | 0.00 | 1.00 | 0.86 |
| 6.88_386.2329  | 0.00 | 0.01 | 1.00 | 0.90 |
| 6.24_384.2171  | 0.00 | 0.00 | 1.00 | 0.85 |
| 8.63_398.2317  | 0.00 | 0.00 | 1.00 | 1.00 |
| 1.49_394.1142  | 0.00 | 0.00 | 1.00 | 0.92 |
| 12.60_408.2538 | 0.00 | 0.15 | 1.00 | 0.67 |
| 7.68_401.3048  | 0.00 | 0.00 | 1.00 | 0.86 |
| 9.40_418.0851  | 0.00 | 0.00 | 1.00 | 0.97 |
| 8.66_429.0854  | 0.00 | 0.00 | 1.00 | 0.77 |
| 9.08_429.0845  | 0.00 | 0.00 | 1.00 | 0.82 |
| 4.02_423.1940  | 0.00 | 0.00 | 0.98 | 1.00 |
| 1.48_431.0890  | 0.00 | 0.45 | 1.00 | 0.91 |
| 9.07_451.0615  | 0.00 | 0.00 | 1.00 | 0.97 |
| 9.09_448.0576  | 0.00 | 0.00 | 1.00 | 0.71 |
| 6.99_443.3240  | 0.00 | 0.08 | 1.00 | 0.95 |
| 9.73_443.1014  | 0.00 | 0.00 | 1.00 | 0.87 |
| 8.33_443.0954  | 0.00 | 0.00 | 1.00 | 0.90 |
| 6.90_461.2902  | 0.00 | 0.00 | 1.00 | 0.96 |
| 5.90_459.3212  | 0.00 | 0.13 | 1.00 | 0.76 |
| 10.02_459.0960 | 0.00 | 0.00 | 1.00 | 0.77 |
| 9.03_457.1145  | 0.00 | 0.00 | 1.00 | 0.79 |
| 8.67_457.1133  | 0.00 | 0.00 | 1.00 | 0.95 |
| 11.52_456.3791 | 0.00 | 0.00 | 0.70 | 1.00 |
| 6.21_455.1906  | 0.00 | 0.19 | 1.00 | 0.85 |
| 9.81_454.0847  | 0.00 | 0.00 | 1.00 | 0.88 |
| 9.05_454.0819  | 0.00 | 0.00 | 1.00 | 0.72 |
| 5.01_452.1838  | 0.00 | 0.00 | 0.99 | 1.00 |
| 6.42_472.2832  | 0.00 | 0.00 | 0.56 | 1.00 |
| 6.46_471.2466  | 0.00 | 0.01 | 1.00 | 0.90 |
| 10.02_470.0758 | 0.00 | 0.00 | 1.00 | 0.82 |
| 9.02_468.1011  | 0.00 | 0.00 | 1.00 | 0.83 |
| 8.31_465.0807  | 0.00 | 0.00 | 1.00 | 0.79 |
| 8.82_465.0807  | 0.00 | 0.00 | 1.00 | 0.70 |
| 9.79_462.0710  | 0.00 | 0.00 | 1.00 | 0.81 |
| 9.04_462.0699  | 0.00 | 0.00 | 1.00 | 0.73 |
| 9.78_481.0499  | 0.00 | 0.00 | 0.74 | 1.00 |
| 9.02_479.0963  | 0.00 | 0.00 | 1.00 | 0.88 |
| 10.01_478.0692 | 0.00 | 0.00 | 1.00 | 0.66 |
| 4.15_476.2404  | 0.00 | 0.00 | 1.00 | 0.84 |
| 9.02_476.0877  | 0.00 | 0.00 | 1.00 | 0.79 |
| 7.51_499.2782  | 0.00 | 0.06 | 1.00 | 0.92 |
| 9.02_495.0687  | 0.00 | 0.00 | 1.00 | 0.95 |
| 4.37_494.2617  | 0.00 | 0.00 | 0.50 | 1.00 |
| 9.74_493.2809  | 0.00 | 0.01 | 1.00 | 0.93 |
| 5.37_493.1709  | 0.00 | 0.00 | 1.00 | 0.80 |
| 9.79_513.1525  | 0.00 | 0.00 | 1.00 | 0.62 |

## D. Mass Spectral Data for Selected Features

|                |      |      |      |      |
|----------------|------|------|------|------|
| 6.65_512.8485  | 0.00 | 0.00 | 0.95 | 1.00 |
| 5.76_512.6875  | 0.00 | 0.00 | 1.00 | 1.00 |
| 9.09_512.3013  | 0.00 | 0.00 | 1.00 | 0.82 |
| 13.62_510.2556 | 0.00 | 0.37 | 1.00 | 0.85 |
| 5.65_504.2609  | 0.00 | 0.00 | 1.00 | 0.99 |
| 5.64_515.2738  | 0.00 | 0.00 | 1.00 | 0.91 |
| 9.71_537.3041  | 0.00 | 0.00 | 0.95 | 1.00 |
| 10.06_526.3139 | 0.00 | 0.00 | 1.00 | 0.86 |
| 7.21_526.2839  | 0.00 | 0.02 | 0.97 | 1.00 |
| 7.20_544.2918  | 0.00 | 0.00 | 1.00 | 0.93 |
| 7.57_542.3960  | 0.00 | 0.15 | 1.00 | 0.65 |
| 12.03_565.3746 | 0.00 | 0.08 | 0.73 | 1.00 |
| 7.14_560.1805  | 0.00 | 0.00 | 0.75 | 1.00 |
| 6.90_555.3068  | 0.00 | 0.00 | 1.00 | 0.92 |
| 5.52_601.2501  | 0.00 | 0.00 | 1.00 | 0.87 |
| 9.02_590.6205  | 0.00 | 0.00 | 1.00 | 0.79 |
| 9.74_581.3322  | 0.00 | 0.00 | 0.96 | 1.00 |
| 9.79_576.6021  | 0.00 | 0.00 | 0.82 | 1.00 |
| 9.06_576.6005  | 0.00 | 0.00 | 0.97 | 1.00 |
| 1.25_639.8836  | 0.00 | 0.00 | 1.00 | 0.83 |
| 12.72_634.4531 | 0.00 | 0.00 | 1.00 | 0.73 |
| 9.71_625.3598  | 0.00 | 0.00 | 1.00 | 0.84 |
| 9.73_669.3835  | 0.00 | 0.00 | 1.00 | 0.90 |
| 9.02_704.1451  | 0.00 | 0.00 | 1.00 | 0.61 |
| 9.03_696.1548  | 0.00 | 0.00 | 1.00 | 0.81 |
| 9.71_694.1152  | 0.00 | 0.00 | 0.77 | 1.00 |
| 9.03_690.1259  | 0.00 | 0.00 | 1.00 | 0.54 |
| 9.79_683.1204  | 0.00 | 0.00 | 1.00 | 0.77 |
| 9.06_676.1101  | 0.00 | 0.00 | 1.00 | 0.87 |
| 9.74_713.4076  | 0.00 | 0.00 | 0.65 | 1.00 |
| 9.78_885.1896  | 0.00 | 0.00 | 1.00 | 0.69 |
| 9.07_879.1306  | 0.00 | 0.00 | 0.96 | 1.00 |
| 9.02_935.1961  | 0.00 | 0.00 | 1.00 | 0.77 |
| 7.20_920.0962  | 0.00 | 0.00 | 0.77 | 1.00 |
| 7.21_916.0943  | 0.00 | 0.00 | 0.54 | 1.00 |
| 9.80_907.1678  | 0.00 | 0.00 | 1.00 | 0.88 |
| 9.04_907.1662  | 0.00 | 0.00 | 1.00 | 0.53 |
| 7.65_1000.0444 | 0.00 | 0.00 | 0.87 | 1.00 |
| 7.63_942.9948  | 0.00 | 0.00 | 1.00 | 0.83 |
| 7.01_1221.4414 | 0.00 | 0.00 | 0.92 | 1.00 |
| 6.97_357.2762  | 0.00 | 0.00 | 1.00 | 0.85 |
| 9.79_218.0234  | 0.00 | 0.01 | 1.00 | 0.89 |
| 7.07_184.1710  | 0.00 | 0.00 | 1.00 | 0.83 |
| 9.78_465.0808  | 0.00 | 0.01 | 1.00 | 0.94 |
| 8.21_315.2621  | 0.00 | 0.01 | 1.00 | 0.83 |
| 8.21_212.2021  | 0.00 | 0.00 | 1.00 | 0.84 |
| 5.66_384.2168  | 0.00 | 0.00 | 1.00 | 0.87 |
| 9.79_1349.2480 | 0.01 | 0.00 | 1.00 | 0.88 |
| 9.27_343.2981  | 0.01 | 0.03 | 1.00 | 0.92 |
| 8.34_150.0928  | 0.01 | 0.09 | 0.90 | 1.00 |
| 10.70_288.2557 | 0.01 | 0.01 | 1.00 | 0.74 |
| 1.64_174.0879  | 0.01 | 0.00 | 1.00 | 1.00 |
| 6.76_310.2021  | 0.01 | 0.00 | 1.00 | 1.00 |
| 1.82_228.1004  | 0.01 | 0.00 | 1.00 | 0.82 |
| 6.06_294.2084  | 0.01 | 0.00 | 1.00 | 0.80 |
| 6.24_515.2753  | 0.01 | 0.00 | 1.00 | 0.97 |
| 8.74_542.3146  | 0.01 | 0.00 | 0.89 | 1.00 |
| 1.29_203.9309  | 0.01 | 0.00 | 0.96 | 1.00 |
| 1.64_246.1172  | 0.01 | 0.00 | 1.00 | 0.96 |
| 9.71_757.4327  | 0.01 | 0.00 | 0.92 | 1.00 |
| 6.65_282.2073  | 0.02 | 0.11 | 1.00 | 0.75 |
| 7.48_177.0877  | 0.02 | 0.00 | 1.00 | 0.86 |
| 1.75_507.1572  | 0.02 | 0.00 | 1.00 | 0.62 |
| 8.10_301.1534  | 0.02 | 0.10 | 1.00 | 0.95 |
| 8.29_401.1993  | 0.03 | 0.00 | 1.00 | 0.82 |
| 4.82_393.2208  | 0.03 | 0.00 | 1.00 | 0.74 |
| 16.15_710.1773 | 0.03 | 0.01 | 0.61 | 1.00 |
| 1.53_143.0837  | 0.04 | 0.05 | 0.82 | 1.00 |
| 9.27_240.2315  | 0.04 | 0.03 | 1.00 | 0.81 |
| 5.43_377.1482  | 0.04 | 0.00 | 1.00 | 0.99 |

## D. Mass Spectral Data for Selected Features

|                |      |      |      |      |
|----------------|------|------|------|------|
| 12.62_416.2462 | 0.04 | 0.05 | 1.00 | 0.74 |
| 3.22_235.1201  | 0.05 | 0.00 | 0.91 | 1.00 |
| 7.06_325.1861  | 0.05 | 0.31 | 1.00 | 0.78 |
| 9.66_279.1583  | 0.06 | 0.00 | 1.00 | 0.80 |
| 12.02_205.1953 | 0.07 | 0.00 | 1.00 | 0.62 |
| 9.14_239.1284  | 0.07 | 0.06 | 1.00 | 0.88 |
| 1.74_150.0789  | 0.07 | 0.00 | 1.00 | 0.87 |
| 4.75_136.0625  | 0.07 | 0.00 | 0.85 | 1.00 |
| 1.73_338.0231  | 0.07 | 0.00 | 0.97 | 1.00 |
| 6.39_336.2172  | 0.08 | 0.06 | 1.00 | 0.68 |
| 12.57_815.5173 | 0.08 | 0.25 | 1.00 | 0.86 |
| 10.40_371.3275 | 0.08 | 0.15 | 1.00 | 0.80 |
| 12.73_328.1928 | 0.08 | 0.00 | 1.00 | 0.86 |
| 6.72_1450.6973 | 0.08 | 0.02 | 0.72 | 1.00 |
| 8.53_283.1523  | 0.08 | 0.18 | 0.82 | 1.00 |
| 1.70_260.1135  | 0.08 | 0.00 | 1.00 | 0.97 |
| 6.66_264.1980  | 0.08 | 0.04 | 1.00 | 0.88 |
| 6.95_218.1203  | 0.09 | 0.19 | 1.00 | 0.87 |
| 12.66_372.2164 | 0.10 | 0.24 | 1.00 | 0.80 |
| 12.70_350.2054 | 0.10 | 0.19 | 1.00 | 0.86 |
| 16.22_252.0441 | 0.11 | 0.19 | 0.60 | 1.00 |
| 1.77_218.1042  | 0.11 | 0.03 | 1.00 | 1.00 |
| 3.86_150.0940  | 0.11 | 0.21 | 1.00 | 0.92 |
| 7.25_371.1508  | 0.12 | 0.00 | 1.00 | 0.87 |
| 6.71_1160.7578 | 0.12 | 0.00 | 0.81 | 1.00 |
| 12.78_306.1796 | 0.13 | 0.22 | 1.00 | 0.89 |
| 12.63_394.2284 | 0.13 | 0.10 | 1.00 | 0.73 |
| 7.06_221.1900  | 0.14 | 0.44 | 1.00 | 0.97 |
| 7.62_970.6124  | 0.15 | 0.21 | 0.74 | 1.00 |
| 8.53_207.1002  | 0.15 | 0.19 | 0.85 | 1.00 |
| 7.42_280.1237  | 0.15 | 0.42 | 1.00 | 0.93 |
| 12.55_438.2596 | 0.16 | 0.26 | 1.00 | 0.68 |
| 3.80_288.1929  | 0.17 | 0.15 | 1.00 | 0.93 |
| 12.73_320.2010 | 0.17 | 0.18 | 1.00 | 0.90 |
| 12.62_787.4580 | 0.18 | 0.31 | 1.00 | 0.92 |
| 7.06_203.1787  | 0.19 | 0.35 | 1.00 | 0.91 |
| 8.53_177.0880  | 0.19 | 0.18 | 1.00 | 0.85 |
| 10.98_442.3651 | 0.20 | 0.16 | 1.00 | 0.77 |
| 4.88_188.0708  | 0.20 | 0.35 | 1.00 | 0.92 |
| 12.70_699.4109 | 0.20 | 0.23 | 1.00 | 0.96 |
| 6.41_165.0905  | 0.21 | 0.14 | 0.89 | 1.00 |
| 6.06_203.1781  | 0.21 | 0.37 | 1.00 | 0.92 |
| 4.87_329.1844  | 0.22 | 0.00 | 1.00 | 0.87 |
| 16.18_335.9929 | 0.22 | 0.00 | 0.66 | 1.00 |
| 12.78_611.3565 | 0.22 | 0.25 | 1.00 | 0.98 |
| 1.51_393.5330  | 0.23 | 0.58 | 1.00 | 0.98 |
| 5.84_299.0939  | 0.23 | 0.11 | 0.69 | 1.00 |
| 12.61_771.4862 | 0.24 | 0.30 | 1.00 | 0.83 |
| 12.73_655.3845 | 0.24 | 0.29 | 1.00 | 1.00 |
| 4.31_265.0552  | 0.24 | 0.00 | 1.00 | 0.82 |
| 12.67_743.4367 | 0.24 | 0.27 | 1.00 | 0.95 |
| 12.70_683.4373 | 0.24 | 0.32 | 1.00 | 0.83 |
| 5.97_286.6247  | 0.24 | 0.04 | 0.82 | 1.00 |
| 12.79_595.3829 | 0.25 | 0.34 | 1.00 | 0.84 |
| 12.67_727.4605 | 0.25 | 0.34 | 1.00 | 0.81 |
| 2.84_200.1047  | 0.25 | 0.00 | 1.00 | 0.99 |
| 12.74_639.4067 | 0.26 | 0.31 | 1.00 | 0.84 |
| 6.95_368.2220  | 0.27 | 0.47 | 1.00 | 0.85 |
| 12.86_523.3040 | 0.27 | 0.18 | 0.94 | 1.00 |
| 12.80_567.3292 | 0.27 | 0.32 | 0.97 | 1.00 |
| 3.85_276.1433  | 0.28 | 0.16 | 0.98 | 1.00 |
| 1.65_159.0768  | 0.28 | 0.00 | 0.65 | 1.00 |
| 12.86_507.3281 | 0.28 | 0.43 | 1.00 | 0.74 |
| 4.30_310.1305  | 0.28 | 0.06 | 1.00 | 0.96 |
| 4.12_413.1243  | 0.32 | 0.58 | 1.00 | 0.99 |
| 7.91_389.2523  | 0.33 | 0.15 | 1.00 | 0.93 |
| 3.83_198.1623  | 0.33 | 0.23 | 1.00 | 0.89 |
| 7.65_970.5389  | 0.33 | 0.00 | 1.00 | 0.95 |
| 12.82_551.3593 | 0.34 | 0.50 | 0.86 | 1.00 |
| 12.87_262.1528 | 0.35 | 0.15 | 1.00 | 0.94 |

## D. Mass Spectral Data for Selected Features

|                |      |      |      |      |
|----------------|------|------|------|------|
| 6.78_176.0714  | 0.36 | 0.62 | 1.00 | 0.87 |
| 12.70_678.4764 | 0.37 | 0.21 | 1.00 | 0.72 |
| 12.86_502.3745 | 0.37 | 0.45 | 1.00 | 0.72 |
| 12.86_463.2998 | 0.37 | 0.49 | 1.00 | 0.79 |
| 3.76_347.1589  | 0.38 | 0.00 | 1.00 | 0.75 |
| 12.56_441.2657 | 0.39 | 0.56 | 0.84 | 1.00 |
| 6.73_1160.5609 | 0.39 | 0.00 | 0.82 | 1.00 |
| 12.67_722.5060 | 0.41 | 0.20 | 1.00 | 0.73 |
| 5.61_343.2002  | 0.43 | 0.10 | 1.00 | 0.85 |
| 4.29_244.1199  | 0.47 | 0.49 | 0.93 | 1.00 |
| 4.00_320.1711  | 0.49 | 0.06 | 1.00 | 0.99 |
| 14.78_323.2583 | 0.50 | 1.00 | 0.00 | 0.03 |
| 13.49_420.3478 | 0.51 | 1.00 | 0.01 | 0.00 |
| 10.60_346.3091 | 0.51 | 1.00 | 0.00 | 0.00 |
| 13.00_413.3095 | 0.52 | 1.00 | 0.05 | 0.00 |
| 5.16_210.1137  | 0.52 | 0.51 | 0.96 | 1.00 |
| 9.48_225.1993  | 0.53 | 1.00 | 0.01 | 0.00 |
| 6.81_807.1918  | 0.54 | 1.00 | 0.00 | 0.00 |
| 6.15_485.2027  | 0.55 | 0.59 | 1.00 | 0.88 |
| 7.42_196.0651  | 0.55 | 0.29 | 1.00 | 0.92 |
| 4.26_669.2631  | 0.56 | 1.00 | 0.00 | 0.00 |
| 11.80_235.1712 | 0.56 | 1.00 | 0.04 | 0.00 |
| 10.15_739.4618 | 0.56 | 1.00 | 0.03 | 0.02 |
| 14.41_309.2409 | 0.56 | 1.00 | 0.04 | 0.03 |
| 10.53_531.4000 | 0.57 | 1.00 | 0.00 | 0.00 |
| 4.86_372.1909  | 0.57 | 0.29 | 1.00 | 0.89 |
| 12.97_407.3144 | 0.58 | 1.00 | 0.01 | 0.00 |
| 12.98_399.3242 | 0.58 | 1.00 | 0.01 | 0.00 |
| 4.09_573.1785  | 0.58 | 1.00 | 0.00 | 0.00 |
| 3.79_359.1699  | 0.59 | 0.29 | 1.00 | 0.92 |
| 4.64_137.0376  | 0.59 | 0.61 | 1.00 | 0.87 |
| 4.37_663.2850  | 0.59 | 1.00 | 0.05 | 0.00 |
| 13.98_433.3418 | 0.61 | 1.00 | 0.01 | 0.00 |
| 4.64_412.2067  | 0.62 | 1.00 | 0.10 | 0.08 |
| 6.19_181.1351  | 0.63 | 1.00 | 0.00 | 0.07 |
| 10.97_401.2525 | 0.63 | 1.00 | 0.00 | 0.00 |
| 11.58_415.2745 | 0.65 | 1.00 | 0.00 | 0.00 |
| 12.62_273.1378 | 0.66 | 1.00 | 0.00 | 0.00 |
| 12.97_290.7254 | 0.66 | 1.00 | 0.15 | 0.05 |
| 4.27_647.2871  | 0.67 | 1.00 | 0.01 | 0.06 |
| 11.44_223.2060 | 0.67 | 1.00 | 0.00 | 0.00 |
| 8.08_219.1411  | 0.68 | 1.00 | 0.36 | 0.28 |
| 6.40_263.1761  | 0.70 | 0.75 | 1.00 | 0.88 |
| 6.85_824.9348  | 0.70 | 1.00 | 0.19 | 0.00 |
| 4.81_506.2950  | 0.71 | 1.00 | 0.39 | 0.33 |
| 16.15_442.8736 | 0.71 | 1.00 | 0.15 | 0.06 |
| 4.40_158.0302  | 0.72 | 0.53 | 0.99 | 1.00 |
| 4.34_266.1408  | 0.72 | 0.56 | 0.98 | 1.00 |
| 4.37_150.0945  | 0.72 | 1.00 | 0.00 | 0.00 |
| 5.94_213.1018  | 0.73 | 0.55 | 0.97 | 1.00 |
| 3.89_518.1743  | 0.73 | 1.00 | 0.00 | 0.00 |
| 11.18_473.3585 | 0.75 | 1.00 | 0.02 | 0.02 |
| 16.18_214.9181 | 0.76 | 1.00 | 0.43 | 0.27 |
| 12.74_443.3505 | 0.77 | 1.00 | 0.00 | 0.00 |
| 12.97_547.4060 | 0.77 | 1.00 | 0.07 | 0.00 |
| 13.86_425.2896 | 0.78 | 1.00 | 0.22 | 0.14 |
| 5.26_147.0936  | 0.79 | 1.00 | 0.33 | 0.30 |
| 13.50_409.7445 | 0.80 | 1.00 | 0.34 | 0.09 |
| 4.28_227.1066  | 0.80 | 1.00 | 0.59 | 0.57 |
| 11.97_299.2600 | 0.80 | 1.00 | 0.00 | 0.00 |
| 13.50_524.2740 | 0.81 | 1.00 | 0.22 | 0.15 |
| 15.06_413.2647 | 0.81 | 1.00 | 0.27 | 0.14 |
| 4.55_279.1361  | 0.81 | 1.00 | 0.65 | 0.60 |
| 1.50_710.1736  | 0.81 | 0.82 | 0.96 | 1.00 |
| 11.84_443.3878 | 0.82 | 1.00 | 0.09 | 0.06 |
| 11.03_354.1608 | 0.82 | 1.00 | 0.11 | 0.09 |
| 11.28_440.3462 | 0.82 | 1.00 | 0.00 | 0.00 |
| 12.98_282.2118 | 0.82 | 1.00 | 0.00 | 0.00 |
| 13.79_365.2675 | 0.84 | 1.00 | 0.00 | 0.00 |
| 9.69_220.1127  | 0.87 | 1.00 | 0.19 | 0.44 |



### D. Mass Spectral Data for Selected Features

|                |      |      |      |      |
|----------------|------|------|------|------|
| 10.38_401.3397 | 0.88 | 1.00 | 0.18 | 0.13 |
| 9.26_219.1735  | 0.88 | 1.00 | 0.00 | 0.00 |
| 14.79_310.3109 | 0.90 | 1.00 | 0.55 | 0.67 |
| 15.94_338.3442 | 0.91 | 1.00 | 0.44 | 0.37 |
| 13.48_341.2200 | 0.91 | 1.00 | 0.34 | 0.19 |
| 13.49_295.2258 | 0.91 | 1.00 | 0.00 | 0.00 |
| 1.47_508.0657  | 0.91 | 1.00 | 0.76 | 0.71 |
| 1.47_748.1127  | 0.94 | 1.00 | 0.84 | 0.83 |
| 4.58_336.1924  | 0.95 | 1.00 | 0.68 | 0.54 |
| 1.48_481.1031  | 0.96 | 1.00 | 0.73 | 0.71 |
| 4.49_225.1597  | 0.97 | 1.00 | 0.52 | 0.50 |
| 13.95_270.2746 | 1.00 | 1.00 | 0.33 | 0.27 |
| 6.34_150.0787  | 1.00 | 0.95 | 0.88 | 0.81 |
| 10.36_211.6353 | 1.00 | 0.89 | 0.20 | 0.00 |
| 3.82_209.1275  | 1.00 | 0.90 | 0.72 | 0.65 |
| 11.31_225.6512 | 1.00 | 0.95 | 0.17 | 0.00 |
| 11.44_291.1951 | 1.00 | 0.75 | 0.00 | 0.00 |
| 11.33_299.2599 | 1.00 | 0.77 | 0.00 | 0.00 |
| 5.53_306.1782  | 1.00 | 0.69 | 0.37 | 0.26 |
| 12.62_313.2746 | 1.00 | 0.83 | 0.00 | 0.00 |
| 14.31_325.2414 | 1.00 | 0.74 | 0.00 | 0.08 |
| 14.82_332.2940 | 1.00 | 0.65 | 0.00 | 0.10 |
| 15.49_338.3442 | 1.00 | 0.86 | 0.00 | 0.00 |
| 4.26_356.1796  | 1.00 | 0.84 | 0.64 | 0.56 |
| 15.92_360.3229 | 1.00 | 0.71 | 0.26 | 0.20 |
| 13.48_397.3392 | 1.00 | 0.75 | 0.00 | 0.00 |
| 10.78_415.3581 | 1.00 | 0.61 | 0.18 | 0.15 |
| 13.95_411.3586 | 1.00 | 0.78 | 0.00 | 0.00 |
| 13.27_419.3131 | 1.00 | 0.81 | 0.00 | 0.00 |
| 10.77_434.3251 | 1.00 | 0.58 | 0.21 | 0.00 |
| 12.97_555.3910 | 1.00 | 0.94 | 0.19 | 0.09 |
| 13.92_641.5490 | 1.00 | 0.85 | 0.00 | 0.00 |
| 4.37_685.2548  | 1.00 | 0.86 | 0.20 | 0.23 |
| 6.87_807.0837  | 1.00 | 0.57 | 0.00 | 0.00 |



## D. Mass Spectral Data for Selected Features

**Table S12.** Normalized heat map of features described as unique in figure 2b and c when comparing wild type *Nocardiosis sp. FU40 ΔApoS8* to the R2 rifampicin resistant mutant extract using OPLS-DA and extracting features from the generated S-plot with correlation coefficients  $\geq 0.9$ . Features are normalized to maximum intensity for that feature.

| Feature ID (RT_m/z) | WT   | WT   | R3   | R3   |
|---------------------|------|------|------|------|
| 12.03_135.1163      | 0.00 | 0.13 | 1.00 | 0.81 |
| 1.52_129.5659       | 0.00 | 0.00 | 1.00 | 0.65 |
| 12.03_123.1165      | 0.00 | 0.00 | 1.00 | 0.81 |
| 4.87_118.0679       | 0.00 | 0.13 | 0.60 | 1.00 |
| 4.95_114.0908       | 0.00 | 0.00 | 0.84 | 1.00 |
| 1.50_165.0624       | 0.00 | 0.00 | 1.00 | 0.83 |
| 6.56_162.0938       | 0.00 | 0.00 | 1.00 | 0.86 |
| 4.31_160.1140       | 0.00 | 0.00 | 1.00 | 0.88 |
| 5.78_170.1204       | 0.00 | 0.00 | 1.00 | 0.92 |
| 7.08_169.0882       | 0.00 | 0.02 | 0.64 | 1.00 |
| 2.44_166.0747       | 0.00 | 0.12 | 1.00 | 0.85 |
| 6.60_180.1017       | 0.00 | 0.02 | 1.00 | 0.77 |
| 4.95_177.1399       | 0.00 | 0.43 | 1.00 | 0.94 |
| 9.12_191.0134       | 0.00 | 0.00 | 1.00 | 0.78 |
| 6.97_190.1257       | 0.00 | 0.00 | 1.00 | 0.82 |
| 4.99_198.1134       | 0.00 | 0.00 | 0.68 | 1.00 |
| 9.08_196.0187       | 0.00 | 0.00 | 1.00 | 0.99 |
| 8.84_203.1804       | 0.00 | 0.00 | 1.00 | 0.93 |
| 9.08_203.0278       | 0.00 | 0.00 | 0.89 | 1.00 |
| 9.80_203.0277       | 0.00 | 0.00 | 1.00 | 0.82 |
| 9.42_202.0393       | 0.00 | 0.00 | 1.00 | 0.87 |
| 4.35_209.0956       | 0.00 | 0.00 | 0.65 | 1.00 |
| 4.54_208.1355       | 0.00 | 0.00 | 0.95 | 1.00 |
| 5.44_208.0539       | 0.00 | 0.00 | 0.95 | 1.00 |
| 7.49_207.0994       | 0.00 | 0.07 | 1.00 | 0.63 |
| 1.30_205.9283       | 0.00 | 0.00 | 1.00 | 0.75 |
| 4.84_205.1323       | 0.00 | 0.00 | 1.00 | 0.94 |
| 8.67_212.0251       | 0.00 | 0.00 | 1.00 | 0.87 |
| 1.32_211.8786       | 0.00 | 0.00 | 1.00 | 0.84 |
| 9.81_210.0363       | 0.00 | 0.00 | 0.85 | 1.00 |
| 9.07_210.0305       | 0.00 | 0.00 | 0.58 | 1.00 |
| 9.41_219.0312       | 0.00 | 0.00 | 0.69 | 1.00 |
| 3.69_218.1136       | 0.00 | 0.30 | 1.00 | 0.83 |
| 8.67_218.0490       | 0.00 | 0.00 | 0.92 | 1.00 |
| 9.03_217.0413       | 0.00 | 0.00 | 1.00 | 0.99 |
| 8.84_221.1903       | 0.00 | 0.00 | 1.00 | 0.85 |
| 6.51_220.1710       | 0.00 | 0.03 | 0.59 | 1.00 |
| 4.58_226.1445       | 0.00 | 0.00 | 0.91 | 1.00 |
| 5.11_226.1427       | 0.00 | 0.03 | 0.67 | 1.00 |
| 9.04_225.0298       | 0.00 | 0.01 | 1.00 | 0.97 |
| 9.77_224.0325       | 0.00 | 0.00 | 0.95 | 1.00 |
| 5.11_227.1386       | 0.00 | 0.00 | 0.91 | 1.00 |
| 9.82_230.0718       | 0.00 | 0.04 | 1.00 | 1.00 |
| 6.24_230.0717       | 0.00 | 0.34 | 1.00 | 0.88 |
| 8.41_230.0715       | 0.00 | 0.00 | 1.00 | 0.75 |
| 5.11_236.1306       | 0.00 | 0.12 | 0.68 | 1.00 |
| 4.89_235.1441       | 0.00 | 0.00 | 1.00 | 0.98 |
| 9.80_241.0261       | 0.00 | 0.00 | 1.00 | 0.63 |
| 5.81_248.1281       | 0.00 | 0.25 | 0.76 | 1.00 |
| 9.03_248.0351       | 0.00 | 0.00 | 1.00 | 0.51 |
| 4.04_247.1287       | 0.00 | 0.00 | 1.00 | 0.91 |
| 5.04_244.1219       | 0.00 | 0.00 | 0.87 | 1.00 |
| 2.62_252.0382       | 0.00 | 0.29 | 0.96 | 1.00 |
| 11.26_250.1814      | 0.00 | 0.00 | 1.00 | 0.73 |
| 14.09_252.0478      | 0.00 | 0.00 | 0.56 | 1.00 |
| 8.66_252.0394       | 0.00 | 0.00 | 0.67 | 1.00 |
| 12.02_263.1978      | 0.00 | 0.10 | 1.00 | 0.79 |
| 1.78_262.1278       | 0.00 | 0.00 | 0.87 | 1.00 |
| 5.86_262.1048       | 0.00 | 0.26 | 0.68 | 1.00 |
| 10.71_261.1779      | 0.00 | 0.03 | 1.00 | 0.87 |
| 5.01_261.1438       | 0.00 | 0.03 | 1.00 | 0.79 |
| 5.43_268.0192       | 0.00 | 0.06 | 1.00 | 0.52 |
| 8.32_268.0180       | 0.00 | 0.00 | 0.97 | 1.00 |
| 10.77_267.1616      | 0.00 | 0.12 | 1.00 | 0.81 |

## D. Mass Spectral Data for Selected Features

|                |      |      |      |      |
|----------------|------|------|------|------|
| 2.47_276.1033  | 0.00 | 0.00 | 0.81 | 1.00 |
| 9.12_279.1585  | 0.00 | 0.00 | 1.00 | 0.94 |
| 7.18_278.2110  | 0.00 | 0.00 | 1.00 | 0.97 |
| 7.19_284.2219  | 0.00 | 0.00 | 0.95 | 1.00 |
| 7.50_283.1523  | 0.00 | 0.05 | 1.00 | 0.81 |
| 9.01_283.1521  | 0.00 | 0.13 | 0.70 | 1.00 |
| 1.73_282.0649  | 0.00 | 0.03 | 0.98 | 1.00 |
| 7.72_281.1420  | 0.00 | 0.00 | 0.95 | 1.00 |
| 5.22_295.1312  | 0.00 | 0.02 | 1.00 | 0.82 |
| 7.82_294.2085  | 0.00 | 0.00 | 1.00 | 0.80 |
| 6.82_294.2084  | 0.00 | 0.00 | 0.68 | 1.00 |
| 7.15_293.2251  | 0.00 | 0.00 | 1.00 | 0.96 |
| 4.87_293.1612  | 0.00 | 0.25 | 0.79 | 1.00 |
| 3.76_299.1387  | 0.00 | 0.00 | 1.00 | 0.57 |
| 4.74_298.0969  | 0.00 | 0.07 | 1.00 | 0.85 |
| 9.60_297.1694  | 0.00 | 0.01 | 1.00 | 0.84 |
| 7.19_296.2224  | 0.00 | 0.00 | 0.97 | 1.00 |
| 3.78_300.1386  | 0.00 | 0.03 | 1.00 | 0.68 |
| 12.02_309.1921 | 0.00 | 0.03 | 1.00 | 0.66 |
| 6.00_308.2238  | 0.00 | 0.00 | 1.00 | 0.97 |
| 6.06_312.2197  | 0.00 | 0.00 | 1.00 | 0.87 |
| 6.84_312.2197  | 0.00 | 0.00 | 0.95 | 1.00 |
| 7.24_312.2197  | 0.00 | 0.00 | 0.96 | 1.00 |
| 9.79_311.0549  | 0.00 | 0.00 | 0.75 | 1.00 |
| 1.74_322.0446  | 0.00 | 0.02 | 0.91 | 1.00 |
| 9.13_319.1539  | 0.00 | 0.00 | 1.00 | 0.92 |
| 6.92_318.2094  | 0.00 | 0.00 | 1.00 | 0.85 |
| 6.00_328.7423  | 0.00 | 0.09 | 1.00 | 0.56 |
| 5.91_328.5999  | 0.00 | 0.00 | 0.62 | 1.00 |
| 7.34_326.2353  | 0.00 | 0.00 | 1.00 | 0.89 |
| 6.01_326.2353  | 0.00 | 0.00 | 1.00 | 0.87 |
| 4.97_326.0999  | 0.00 | 0.27 | 1.00 | 0.90 |
| 12.03_325.1706 | 0.00 | 0.00 | 1.00 | 0.66 |
| 6.08_324.1828  | 0.00 | 0.23 | 0.81 | 1.00 |
| 6.62_334.2005  | 0.00 | 0.00 | 1.00 | 1.00 |
| 8.76_329.1942  | 0.00 | 0.09 | 0.92 | 1.00 |
| 5.84_341.1007  | 0.00 | 0.00 | 0.85 | 1.00 |
| 7.48_345.1875  | 0.00 | 0.00 | 0.89 | 1.00 |
| 7.37_344.2218  | 0.00 | 0.00 | 1.00 | 0.75 |
| 6.06_359.1205  | 0.00 | 0.00 | 0.58 | 1.00 |
| 8.24_352.2057  | 0.00 | 0.00 | 0.71 | 1.00 |
| 4.01_351.5992  | 0.00 | 0.00 | 0.81 | 1.00 |
| 6.67_362.2335  | 0.00 | 0.00 | 0.99 | 1.00 |
| 6.51_360.2165  | 0.00 | 0.00 | 1.00 | 0.75 |
| 8.53_359.2035  | 0.00 | 0.12 | 1.00 | 0.70 |
| 8.77_368.2219  | 0.00 | 0.00 | 1.00 | 0.66 |
| 6.02_368.2219  | 0.00 | 0.07 | 0.95 | 1.00 |
| 7.52_368.2211  | 0.00 | 0.00 | 1.00 | 0.73 |
| 9.80_367.0822  | 0.00 | 0.00 | 1.00 | 0.99 |
| 9.04_366.2404  | 0.00 | 0.00 | 1.00 | 0.66 |
| 5.64_366.2063  | 0.00 | 0.00 | 0.75 | 1.00 |
| 9.80_387.0731  | 0.00 | 0.00 | 0.98 | 1.00 |
| 6.88_386.2329  | 0.00 | 0.00 | 1.00 | 0.76 |
| 6.89_384.2172  | 0.00 | 0.00 | 0.86 | 1.00 |
| 6.24_384.2171  | 0.00 | 0.00 | 0.54 | 1.00 |
| 8.63_398.2317  | 0.00 | 0.00 | 0.97 | 1.00 |
| 1.49_394.1142  | 0.00 | 0.00 | 0.53 | 1.00 |
| 8.66_429.0854  | 0.00 | 0.00 | 0.94 | 1.00 |
| 9.08_429.0845  | 0.00 | 0.00 | 1.00 | 0.92 |
| 9.42_432.0873  | 0.00 | 0.00 | 1.00 | 1.00 |
| 9.07_451.0615  | 0.00 | 0.00 | 1.00 | 0.69 |
| 9.09_448.0576  | 0.00 | 0.00 | 1.00 | 0.66 |
| 6.99_443.3240  | 0.00 | 0.06 | 1.00 | 0.61 |
| 9.73_443.1014  | 0.00 | 0.00 | 1.00 | 0.99 |
| 8.33_443.0954  | 0.00 | 0.00 | 1.00 | 0.82 |
| 6.90_461.2902  | 0.00 | 0.00 | 0.96 | 1.00 |
| 5.90_459.3212  | 0.00 | 0.09 | 1.00 | 0.68 |
| 10.02_459.0960 | 0.00 | 0.00 | 1.00 | 0.76 |
| 9.03_457.1145  | 0.00 | 0.00 | 1.00 | 0.91 |
| 8.67_457.1133  | 0.00 | 0.00 | 1.00 | 0.75 |

## D. Mass Spectral Data for Selected Features

|                |      |      |      |      |
|----------------|------|------|------|------|
| 11.52_456.3791 | 0.00 | 0.00 | 1.00 | 0.50 |
| 6.21_455.1906  | 0.00 | 0.16 | 0.99 | 1.00 |
| 9.81_454.0847  | 0.00 | 0.00 | 1.00 | 0.70 |
| 6.46_471.2466  | 0.00 | 0.01 | 1.00 | 0.67 |
| 9.02_468.1011  | 0.00 | 0.00 | 1.00 | 0.61 |
| 9.08_467.0388  | 0.00 | 0.00 | 1.00 | 0.68 |
| 9.79_462.0710  | 0.00 | 0.00 | 1.00 | 0.67 |
| 9.78_481.0499  | 0.00 | 0.00 | 0.57 | 1.00 |
| 9.02_479.0963  | 0.00 | 0.00 | 1.00 | 0.84 |
| 10.01_478.0692 | 0.00 | 0.00 | 1.00 | 0.76 |
| 4.15_476.2404  | 0.00 | 0.00 | 1.00 | 0.80 |
| 9.02_476.0877  | 0.00 | 0.00 | 1.00 | 0.78 |
| 6.98_499.2793  | 0.00 | 0.00 | 1.00 | 0.62 |
| 7.51_499.2782  | 0.00 | 0.05 | 0.81 | 1.00 |
| 9.02_495.0687  | 0.00 | 0.00 | 1.00 | 0.61 |
| 4.37_494.2617  | 0.00 | 0.00 | 0.98 | 1.00 |
| 5.37_493.1709  | 0.00 | 0.00 | 0.71 | 1.00 |
| 9.79_513.1525  | 0.00 | 0.00 | 1.00 | 0.59 |
| 9.09_512.3013  | 0.00 | 0.00 | 1.00 | 0.54 |
| 5.65_504.2609  | 0.00 | 0.00 | 0.83 | 1.00 |
| 5.64_515.2738  | 0.00 | 0.01 | 1.00 | 0.79 |
| 10.06_526.3139 | 0.00 | 0.00 | 1.00 | 0.57 |
| 7.21_526.2839  | 0.00 | 0.02 | 1.00 | 0.98 |
| 5.90_546.1391  | 0.00 | 0.00 | 0.76 | 1.00 |
| 7.20_544.2918  | 0.00 | 0.00 | 1.00 | 0.69 |
| 7.57_542.3960  | 0.00 | 0.09 | 1.00 | 0.59 |
| 9.00_540.1495  | 0.00 | 0.00 | 1.00 | 0.72 |
| 6.63_570.3104  | 0.00 | 0.00 | 1.00 | 0.84 |
| 12.03_565.3746 | 0.00 | 0.04 | 1.00 | 0.90 |
| 6.90_555.3068  | 0.00 | 0.00 | 1.00 | 0.77 |
| 5.52_601.2501  | 0.00 | 0.00 | 0.95 | 1.00 |
| 9.79_576.6021  | 0.00 | 0.00 | 1.00 | 0.56 |
| 1.25_639.8836  | 0.00 | 0.00 | 1.00 | 0.72 |
| 9.07_662.0928  | 0.00 | 0.00 | 1.00 | 0.90 |
| 9.02_704.1451  | 0.00 | 0.00 | 1.00 | 0.95 |
| 9.79_683.1204  | 0.00 | 0.00 | 1.00 | 0.66 |
| 9.06_676.1101  | 0.00 | 0.00 | 1.00 | 1.00 |
| 9.78_885.1896  | 0.00 | 0.00 | 1.00 | 0.56 |
| 7.60_846.3434  | 0.00 | 0.00 | 0.75 | 1.00 |
| 9.02_935.1961  | 0.00 | 0.00 | 1.00 | 0.55 |
| 9.80_907.1678  | 0.00 | 0.00 | 1.00 | 0.66 |
| 7.69_1031.1674 | 0.00 | 0.09 | 0.61 | 1.00 |
| 7.63_942.9948  | 0.00 | 0.00 | 0.57 | 1.00 |
| 7.01_1221.4414 | 0.00 | 0.00 | 1.00 | 0.76 |
| 9.79_218.0234  | 0.00 | 0.01 | 1.00 | 0.86 |
| 9.78_465.0808  | 0.00 | 0.01 | 1.00 | 0.81 |
| 8.74_542.3146  | 0.00 | 0.00 | 0.66 | 1.00 |
| 9.79_1349.2480 | 0.00 | 0.00 | 1.00 | 0.51 |
| 8.34_150.0928  | 0.00 | 0.07 | 1.00 | 0.93 |
| 1.64_174.0879  | 0.01 | 0.00 | 0.88 | 1.00 |
| 9.81_269.0437  | 0.01 | 0.00 | 0.62 | 1.00 |
| 6.76_310.2021  | 0.01 | 0.00 | 1.00 | 0.84 |
| 1.82_228.1004  | 0.01 | 0.00 | 0.88 | 1.00 |
| 5.66_384.2168  | 0.01 | 0.00 | 1.00 | 0.77 |
| 6.06_294.2084  | 0.01 | 0.00 | 0.81 | 1.00 |
| 1.29_203.9309  | 0.01 | 0.00 | 1.00 | 0.80 |
| 1.64_246.1172  | 0.01 | 0.00 | 1.00 | 0.94 |
| 6.24_515.2753  | 0.01 | 0.01 | 0.93 | 1.00 |
| 7.48_177.0877  | 0.02 | 0.00 | 0.94 | 1.00 |
| 8.10_301.1534  | 0.02 | 0.07 | 1.00 | 0.75 |
| 1.53_143.0837  | 0.03 | 0.03 | 0.93 | 1.00 |
| 1.75_507.1572  | 0.03 | 0.00 | 0.68 | 1.00 |
| 3.22_235.1201  | 0.03 | 0.00 | 1.00 | 0.87 |
| 16.15_710.1773 | 0.03 | 0.01 | 0.77 | 1.00 |
| 12.02_205.1953 | 0.04 | 0.00 | 1.00 | 0.79 |
| 5.43_377.1482  | 0.05 | 0.00 | 1.00 | 0.86 |
| 1.73_338.0231  | 0.05 | 0.00 | 0.98 | 1.00 |
| 7.06_325.1861  | 0.05 | 0.29 | 1.00 | 0.91 |
| 8.29_401.1993  | 0.05 | 0.00 | 1.00 | 0.92 |
| 4.37_326.1802  | 0.05 | 0.32 | 0.66 | 1.00 |

## D. Mass Spectral Data for Selected Features

|                |      |      |      |      |
|----------------|------|------|------|------|
| 6.39_336.2172  | 0.05 | 0.04 | 1.00 | 0.91 |
| 9.66_279.1583  | 0.06 | 0.00 | 0.69 | 1.00 |
| 6.66_264.1980  | 0.06 | 0.03 | 0.66 | 1.00 |
| 3.07_230.1126  | 0.06 | 0.15 | 0.85 | 1.00 |
| 1.77_218.1042  | 0.06 | 0.02 | 1.00 | 0.83 |
| 9.67_319.1539  | 0.07 | 0.09 | 0.83 | 1.00 |
| 4.75_136.0625  | 0.07 | 0.00 | 1.00 | 0.84 |
| 8.53_283.1523  | 0.07 | 0.14 | 1.00 | 0.90 |
| 7.62_970.6124  | 0.07 | 0.10 | 0.54 | 1.00 |
| 1.74_150.0789  | 0.07 | 0.00 | 1.00 | 0.81 |
| 1.70_260.1135  | 0.07 | 0.00 | 1.00 | 0.93 |
| 6.95_218.1203  | 0.08 | 0.16 | 1.00 | 0.83 |
| 9.14_239.1284  | 0.10 | 0.09 | 1.00 | 0.62 |
| 16.24_268.0194 | 0.10 | 0.20 | 0.72 | 1.00 |
| 8.53_207.1002  | 0.10 | 0.12 | 0.61 | 1.00 |
| 3.83_292.1654  | 0.11 | 0.00 | 0.56 | 1.00 |
| 6.72_1450.6973 | 0.12 | 0.03 | 1.00 | 0.69 |
| 3.80_288.1929  | 0.12 | 0.11 | 0.88 | 1.00 |
| 3.86_150.0940  | 0.13 | 0.23 | 1.00 | 0.92 |
| 1.65_159.0768  | 0.13 | 0.00 | 0.83 | 1.00 |
| 6.95_368.2220  | 0.13 | 0.22 | 1.00 | 0.95 |
| 7.06_221.1900  | 0.13 | 0.39 | 1.00 | 0.74 |
| 8.53_177.0880  | 0.13 | 0.13 | 1.00 | 0.98 |
| 7.25_371.1508  | 0.13 | 0.00 | 0.58 | 1.00 |
| 10.52_673.3745 | 0.14 | 0.22 | 1.00 | 0.70 |
| 16.22_252.0441 | 0.14 | 0.25 | 0.77 | 1.00 |
| 7.42_280.1237  | 0.16 | 0.43 | 1.00 | 0.84 |
| 1.76_596.1679  | 0.16 | 0.00 | 0.74 | 1.00 |
| 13.77_459.1339 | 0.16 | 0.35 | 0.67 | 1.00 |
| 6.71_1160.7578 | 0.17 | 0.00 | 1.00 | 0.69 |
| 7.06_203.1787  | 0.17 | 0.33 | 1.00 | 0.91 |
| 5.97_286.6247  | 0.18 | 0.03 | 1.00 | 1.00 |
| 3.82_230.1126  | 0.20 | 0.12 | 0.78 | 1.00 |
| 6.41_165.0905  | 0.21 | 0.14 | 1.00 | 0.85 |
| 4.87_329.1844  | 0.22 | 0.00 | 1.00 | 0.97 |
| 4.31_265.0552  | 0.23 | 0.00 | 0.85 | 1.00 |
| 4.88_188.0708  | 0.23 | 0.40 | 0.92 | 1.00 |
| 9.41_281.1770  | 0.26 | 0.48 | 1.00 | 0.84 |
| 3.85_276.1433  | 0.26 | 0.15 | 1.00 | 0.83 |
| 4.30_284.1098  | 0.27 | 0.08 | 0.68 | 1.00 |
| 4.30_310.1305  | 0.28 | 0.06 | 0.94 | 1.00 |
| 4.12_413.1243  | 0.28 | 0.50 | 0.76 | 1.00 |
| 16.18_335.9929 | 0.28 | 0.00 | 1.00 | 0.67 |
| 6.06_203.1781  | 0.29 | 0.51 | 1.00 | 0.99 |
| 5.11_307.1591  | 0.31 | 0.00 | 0.74 | 1.00 |
| 4.81_464.2611  | 0.34 | 0.41 | 1.00 | 0.92 |
| 3.76_347.1589  | 0.38 | 0.00 | 1.00 | 0.78 |
| 6.78_176.0714  | 0.39 | 0.66 | 1.00 | 0.96 |
| 3.80_194.0821  | 0.43 | 0.00 | 0.92 | 1.00 |
| 4.29_244.1199  | 0.44 | 0.45 | 1.00 | 0.93 |
| 4.64_137.0376  | 0.44 | 0.45 | 1.00 | 0.86 |
| 5.61_343.2002  | 0.49 | 0.11 | 1.00 | 0.96 |
| 4.86_372.1909  | 0.49 | 0.25 | 1.00 | 0.86 |
| 12.43_386.2820 | 0.50 | 1.00 | 0.00 | 0.00 |
| 3.79_359.1699  | 0.51 | 0.25 | 1.00 | 0.93 |
| 10.60_346.3091 | 0.51 | 1.00 | 0.00 | 0.00 |
| 9.48_225.1993  | 0.53 | 1.00 | 0.01 | 0.01 |
| 6.81_807.1918  | 0.54 | 1.00 | 0.00 | 0.00 |
| 6.15_485.2027  | 0.55 | 0.59 | 0.86 | 1.00 |
| 4.26_669.2631  | 0.56 | 1.00 | 0.00 | 0.00 |
| 11.80_235.1712 | 0.56 | 1.00 | 0.00 | 0.00 |
| 10.15_739.4618 | 0.56 | 1.00 | 0.03 | 0.02 |
| 14.41_309.2409 | 0.56 | 1.00 | 0.00 | 0.09 |
| 6.27_207.0660  | 0.57 | 1.00 | 0.00 | 0.00 |
| 10.53_531.4000 | 0.57 | 1.00 | 0.00 | 0.00 |
| 12.97_407.3144 | 0.58 | 1.00 | 0.05 | 0.02 |
| 12.98_399.3242 | 0.58 | 1.00 | 0.05 | 0.02 |
| 7.42_196.0651  | 0.59 | 0.30 | 0.97 | 1.00 |
| 4.37_663.2850  | 0.59 | 1.00 | 0.05 | 0.03 |
| 13.98_433.3418 | 0.61 | 1.00 | 0.00 | 0.00 |

## D. Mass Spectral Data for Selected Features

|                |      |      |      |      |
|----------------|------|------|------|------|
| 6.90_166.0720  | 0.61 | 1.00 | 0.00 | 0.00 |
| 4.64_412.2067  | 0.62 | 1.00 | 0.00 | 0.06 |
| 6.19_181.1351  | 0.63 | 1.00 | 0.03 | 0.00 |
| 10.97_401.2525 | 0.63 | 1.00 | 0.00 | 0.00 |
| 11.58_415.2745 | 0.65 | 1.00 | 0.00 | 0.00 |
| 12.62_273.1378 | 0.66 | 1.00 | 0.00 | 0.00 |
| 12.86_507.3281 | 0.66 | 1.00 | 0.20 | 0.14 |
| 12.97_290.7254 | 0.66 | 1.00 | 0.31 | 0.16 |
| 4.27_647.2871  | 0.67 | 1.00 | 0.02 | 0.01 |
| 12.82_551.3593 | 0.67 | 1.00 | 0.21 | 0.16 |
| 11.44_223.2060 | 0.67 | 1.00 | 0.00 | 0.00 |
| 8.08_219.1411  | 0.68 | 1.00 | 0.14 | 0.17 |
| 12.56_441.2657 | 0.70 | 1.00 | 0.28 | 0.26 |
| 6.40_263.1761  | 0.70 | 0.75 | 1.00 | 0.89 |
| 6.85_824.9348  | 0.70 | 1.00 | 0.00 | 0.00 |
| 4.81_506.2950  | 0.71 | 1.00 | 0.12 | 0.10 |
| 16.15_442.8736 | 0.71 | 1.00 | 0.00 | 0.00 |
| 7.07_184.1710  | 0.72 | 1.00 | 0.00 | 0.00 |
| 4.37_150.0945  | 0.72 | 1.00 | 0.00 | 0.00 |
| 12.79_595.3829 | 0.73 | 1.00 | 0.25 | 0.17 |
| 3.89_518.1743  | 0.73 | 1.00 | 0.03 | 0.00 |
| 12.67_727.4605 | 0.74 | 1.00 | 0.33 | 0.21 |
| 11.18_473.3585 | 0.75 | 1.00 | 0.02 | 0.00 |
| 12.70_683.4373 | 0.77 | 1.00 | 0.28 | 0.21 |
| 12.86_463.2998 | 0.77 | 1.00 | 0.07 | 0.18 |
| 12.74_443.3505 | 0.77 | 1.00 | 0.00 | 0.00 |
| 12.97_547.4060 | 0.77 | 1.00 | 0.00 | 0.04 |
| 13.86_425.2896 | 0.78 | 1.00 | 0.27 | 0.23 |
| 1.50_401.0693  | 0.79 | 0.73 | 0.95 | 1.00 |
| 5.26_147.0936  | 0.79 | 1.00 | 0.29 | 0.30 |
| 3.75_267.1417  | 0.80 | 1.00 | 0.58 | 0.43 |
| 12.61_771.4862 | 0.80 | 1.00 | 0.32 | 0.24 |
| 11.97_299.2600 | 0.80 | 1.00 | 0.00 | 0.00 |
| 15.06_413.2647 | 0.81 | 1.00 | 0.27 | 0.26 |
| 12.86_502.3745 | 0.82 | 1.00 | 0.18 | 0.12 |
| 11.84_443.3878 | 0.82 | 1.00 | 0.09 | 0.04 |
| 11.03_354.1608 | 0.82 | 1.00 | 0.05 | 0.05 |
| 11.28_440.3462 | 0.82 | 1.00 | 0.00 | 0.00 |
| 12.98_282.2118 | 0.82 | 1.00 | 0.00 | 0.00 |
| 12.73_655.3845 | 0.83 | 1.00 | 0.00 | 0.22 |
| 12.74_639.4067 | 0.83 | 1.00 | 0.31 | 0.22 |
| 13.79_365.2675 | 0.84 | 1.00 | 0.00 | 0.00 |
| 12.80_567.3292 | 0.85 | 1.00 | 0.30 | 0.19 |
| 12.83_546.4021 | 0.86 | 1.00 | 0.19 | 0.13 |
| 10.38_401.3397 | 0.88 | 1.00 | 0.24 | 0.16 |
| 9.26_219.1735  | 0.88 | 1.00 | 0.00 | 0.00 |
| 12.67_743.4367 | 0.88 | 1.00 | 0.37 | 0.24 |
| 4.50_359.1197  | 0.89 | 1.00 | 0.63 | 0.50 |
| 12.70_699.4109 | 0.89 | 1.00 | 0.20 | 0.00 |
| 5.43_241.1546  | 0.91 | 0.93 | 0.98 | 1.00 |
| 12.78_611.3565 | 0.91 | 1.00 | 0.33 | 0.07 |
| 15.94_338.3442 | 0.91 | 1.00 | 0.41 | 0.39 |
| 13.49_295.2258 | 0.91 | 1.00 | 0.04 | 0.02 |
| 12.73_320.2010 | 0.94 | 1.00 | 0.00 | 0.20 |
| 1.48_481.1031  | 0.96 | 1.00 | 0.88 | 0.83 |
| 4.49_225.1597  | 0.97 | 1.00 | 0.45 | 0.40 |
| 12.89_441.3208 | 0.99 | 1.00 | 0.15 | 0.13 |
| 12.78_590.4295 | 1.00 | 1.00 | 0.20 | 0.14 |
| 13.95_270.2746 | 1.00 | 1.00 | 0.35 | 0.33 |
| 3.99_164.0936  | 1.00 | 0.90 | 0.63 | 0.69 |
| 10.36_211.6353 | 1.00 | 0.89 | 0.25 | 0.00 |
| 3.82_209.1275  | 1.00 | 0.90 | 0.51 | 0.39 |
| 11.31_225.6512 | 1.00 | 0.95 | 0.00 | 0.00 |
| 9.27_240.2315  | 1.00 | 0.88 | 0.16 | 0.16 |
| 10.39_268.2627 | 1.00 | 0.83 | 0.00 | 0.03 |
| 6.59_273.1670  | 1.00 | 0.84 | 0.66 | 0.53 |
| 11.44_291.1951 | 1.00 | 0.75 | 0.00 | 0.00 |
| 11.33_299.2599 | 1.00 | 0.77 | 0.00 | 0.00 |
| 12.62_313.2746 | 1.00 | 0.83 | 0.01 | 0.00 |
| 14.31_325.2414 | 1.00 | 0.74 | 0.00 | 0.00 |

## D. Mass Spectral Data for Selected Features

|                |      |      |      |      |
|----------------|------|------|------|------|
| 14.82_332.2940 | 1.00 | 0.65 | 0.16 | 0.00 |
| 15.49_338.3442 | 1.00 | 0.86 | 0.00 | 0.06 |
| 4.26_356.1796  | 1.00 | 0.84 | 0.59 | 0.52 |
| 15.92_360.3229 | 1.00 | 0.71 | 0.32 | 0.13 |
| 13.48_397.3392 | 1.00 | 0.75 | 0.00 | 0.00 |
| 10.78_415.3581 | 1.00 | 0.61 | 0.22 | 0.15 |
| 13.95_411.3586 | 1.00 | 0.78 | 0.00 | 0.00 |
| 13.27_419.3131 | 1.00 | 0.81 | 0.00 | 0.00 |
| 10.77_434.3251 | 1.00 | 0.58 | 0.18 | 0.00 |
| 12.86_485.3471 | 1.00 | 0.86 | 0.13 | 0.09 |
| 12.86_523.3040 | 1.00 | 0.66 | 0.25 | 0.24 |
| 12.81_529.3766 | 1.00 | 0.77 | 0.13 | 0.12 |
| 12.97_555.3910 | 1.00 | 0.94 | 0.00 | 0.12 |
| 12.79_573.4039 | 1.00 | 0.73 | 0.11 | 0.15 |
| 12.75_617.4294 | 1.00 | 0.84 | 0.16 | 0.15 |
| 13.92_641.5490 | 1.00 | 0.85 | 0.00 | 0.00 |
| 4.37_685.2548  | 1.00 | 0.86 | 0.00 | 0.00 |
| 12.67_705.4810 | 1.00 | 0.93 | 0.25 | 0.15 |
| 6.87_807.0837  | 1.00 | 0.57 | 0.00 | 0.00 |

## D. Mass Spectral Data for Selected Features

**Table S13.** Normalized heat map of features described as unique in figure 2b and c when comparing wild type *Nocardioopsis sp. FU40 ΔApoS8* to the R4 rifampicin resistant mutant extract using OPLS-DA and extracting features from the generated S-plot with correlation coefficients  $\geq 0.9$ . Features are normalized to maximum intensity for that feature.

| Feature ID (RT_m/z) | WT   | WT   | R4   | R4   |
|---------------------|------|------|------|------|
| 1.51_137.5554       | 0.00 | 0.00 | 1.00 | 0.52 |
| 1.52_129.5659       | 0.00 | 0.00 | 1.00 | 0.52 |
| 1.50_103.5345       | 0.00 | 0.00 | 0.50 | 1.00 |
| 13.61_149.0907      | 0.00 | 0.00 | 1.00 | 0.75 |
| 6.56_162.0938       | 0.00 | 0.00 | 0.80 | 1.00 |
| 4.31_160.1140       | 0.00 | 0.00 | 0.67 | 1.00 |
| 5.78_170.1204       | 0.00 | 0.00 | 0.64 | 1.00 |
| 6.60_180.1017       | 0.00 | 0.03 | 0.58 | 1.00 |
| 5.02_180.1014       | 0.00 | 0.00 | 0.58 | 1.00 |
| 9.12_191.0134       | 0.00 | 0.00 | 0.60 | 1.00 |
| 4.14_186.1168       | 0.00 | 0.00 | 0.93 | 1.00 |
| 9.08_196.0187       | 0.00 | 0.00 | 0.79 | 1.00 |
| 8.68_204.0325       | 0.00 | 0.00 | 0.72 | 1.00 |
| 9.08_203.0278       | 0.00 | 0.00 | 0.76 | 1.00 |
| 9.42_202.0393       | 0.00 | 0.00 | 0.68 | 1.00 |
| 1.42_201.0074       | 0.00 | 0.00 | 0.79 | 1.00 |
| 4.35_209.0956       | 0.00 | 0.00 | 0.51 | 1.00 |
| 4.54_208.1355       | 0.00 | 0.00 | 0.90 | 1.00 |
| 5.44_208.0539       | 0.00 | 0.00 | 0.78 | 1.00 |
| 7.49_207.0994       | 0.00 | 0.11 | 0.55 | 1.00 |
| 1.30_205.9283       | 0.00 | 0.00 | 0.53 | 1.00 |
| 4.84_205.1323       | 0.00 | 0.00 | 0.86 | 1.00 |
| 8.67_212.0251       | 0.00 | 0.00 | 0.63 | 1.00 |
| 1.49_211.0584       | 0.00 | 0.19 | 0.65 | 1.00 |
| 9.25_211.0284       | 0.00 | 0.01 | 1.00 | 0.92 |
| 8.31_210.0369       | 0.00 | 0.00 | 0.81 | 1.00 |
| 9.81_210.0363       | 0.00 | 0.00 | 1.00 | 0.66 |
| 9.07_210.0305       | 0.00 | 0.00 | 0.77 | 1.00 |
| 9.41_219.0312       | 0.00 | 0.00 | 1.00 | 0.86 |
| 8.67_218.0490       | 0.00 | 0.00 | 0.82 | 1.00 |
| 9.03_217.0413       | 0.00 | 0.00 | 0.70 | 1.00 |
| 2.51_216.0981       | 0.00 | 0.02 | 0.49 | 1.00 |
| 16.16_223.9875      | 0.00 | 0.00 | 0.90 | 1.00 |
| 6.51_220.1710       | 0.00 | 0.04 | 1.00 | 0.99 |
| 4.58_226.1445       | 0.00 | 0.00 | 1.00 | 0.82 |
| 5.11_226.1427       | 0.00 | 0.02 | 0.53 | 1.00 |
| 8.67_226.0395       | 0.00 | 0.00 | 0.61 | 1.00 |
| 9.04_225.0298       | 0.00 | 0.01 | 0.74 | 1.00 |
| 9.77_224.0325       | 0.00 | 0.00 | 0.63 | 1.00 |
| 5.11_227.1386       | 0.00 | 0.00 | 0.56 | 1.00 |
| 9.19_230.0719       | 0.00 | 0.00 | 1.00 | 0.54 |
| 9.82_230.0718       | 0.00 | 0.03 | 0.91 | 1.00 |
| 8.41_230.0715       | 0.00 | 0.00 | 0.96 | 1.00 |
| 10.62_236.1643      | 0.00 | 0.00 | 1.00 | 0.76 |
| 5.11_236.1306       | 0.00 | 0.18 | 0.96 | 1.00 |
| 4.89_235.1441       | 0.00 | 0.00 | 0.93 | 1.00 |
| 8.54_235.1344       | 0.00 | 0.00 | 0.60 | 1.00 |
| 9.80_241.0261       | 0.00 | 0.00 | 1.00 | 0.78 |
| 8.82_241.0249       | 0.00 | 0.00 | 1.00 | 0.94 |
| 4.13_237.1268       | 0.00 | 0.35 | 1.00 | 0.96 |
| 5.81_248.1281       | 0.00 | 0.35 | 1.00 | 0.99 |
| 9.03_248.0351       | 0.00 | 0.00 | 0.80 | 1.00 |
| 4.04_247.1287       | 0.00 | 0.00 | 0.50 | 1.00 |
| 9.07_246.5440       | 0.00 | 0.00 | 0.71 | 1.00 |
| 5.63_245.1880       | 0.00 | 0.00 | 1.00 | 0.83 |
| 5.04_244.1219       | 0.00 | 0.00 | 0.85 | 1.00 |
| 4.70_243.1326       | 0.00 | 0.00 | 0.55 | 1.00 |



## D. Mass Spectral Data for Selected Features

|                |      |      |      |      |
|----------------|------|------|------|------|
| 8.52_250.0297  | 0.00 | 0.00 | 0.76 | 1.00 |
| 4.31_249.0807  | 0.00 | 0.00 | 0.72 | 1.00 |
| 8.08_252.0397  | 0.00 | 0.00 | 1.00 | 0.84 |
| 4.56_252.0394  | 0.00 | 0.16 | 1.00 | 0.63 |
| 8.66_252.0394  | 0.00 | 0.00 | 1.00 | 0.58 |
| 6.82_252.0384  | 0.00 | 0.00 | 0.83 | 1.00 |
| 6.23_258.1449  | 0.00 | 0.00 | 1.00 | 0.75 |
| 9.81_253.5524  | 0.00 | 0.02 | 0.91 | 1.00 |
| 1.78_262.1278  | 0.00 | 0.00 | 0.75 | 1.00 |
| 5.86_262.1048  | 0.00 | 0.41 | 0.85 | 1.00 |
| 9.91_261.5430  | 0.00 | 0.00 | 1.00 | 0.65 |
| 5.01_261.1438  | 0.00 | 0.08 | 0.80 | 1.00 |
| 9.03_260.5527  | 0.00 | 0.00 | 0.72 | 1.00 |
| 8.32_268.0180  | 0.00 | 0.00 | 1.00 | 0.55 |
| 10.77_267.1616 | 0.00 | 0.02 | 1.00 | 1.00 |
| 5.27_264.2082  | 0.00 | 0.00 | 0.79 | 1.00 |
| 9.67_268.0195  | 0.00 | 0.00 | 1.00 | 0.94 |
| 2.47_276.1033  | 0.00 | 0.00 | 0.83 | 1.00 |
| 9.12_279.1585  | 0.00 | 0.00 | 0.56 | 1.00 |
| 7.18_278.2110  | 0.00 | 0.00 | 0.62 | 1.00 |
| 6.07_276.1943  | 0.00 | 0.00 | 0.57 | 1.00 |
| 5.71_286.2118  | 0.00 | 0.00 | 0.84 | 1.00 |
| 7.19_284.2219  | 0.00 | 0.00 | 0.63 | 1.00 |
| 12.79_284.1681 | 0.00 | 0.22 | 1.00 | 0.68 |
| 7.50_283.1523  | 0.00 | 0.06 | 0.78 | 1.00 |
| 1.73_282.0649  | 0.00 | 0.03 | 0.61 | 1.00 |
| 5.22_295.1312  | 0.00 | 0.05 | 0.70 | 1.00 |
| 7.48_294.2085  | 0.00 | 0.00 | 1.00 | 0.58 |
| 7.82_294.2085  | 0.00 | 0.00 | 0.56 | 1.00 |
| 6.82_294.2084  | 0.00 | 0.00 | 0.63 | 1.00 |
| 7.15_293.2251  | 0.00 | 0.00 | 0.92 | 1.00 |
| 4.87_293.1612  | 0.00 | 0.39 | 1.00 | 0.83 |
| 6.49_292.1923  | 0.00 | 0.01 | 0.80 | 1.00 |
| 3.76_299.1387  | 0.00 | 0.08 | 0.64 | 1.00 |
| 7.73_298.2024  | 0.00 | 0.00 | 0.60 | 1.00 |
| 4.74_298.0969  | 0.00 | 0.05 | 0.68 | 1.00 |
| 9.60_297.1694  | 0.00 | 0.01 | 0.61 | 1.00 |
| 7.19_296.2224  | 0.00 | 0.00 | 0.58 | 1.00 |
| 6.00_308.2238  | 0.00 | 0.00 | 0.64 | 1.00 |
| 6.92_313.1550  | 0.00 | 0.00 | 0.55 | 1.00 |
| 6.06_312.2197  | 0.00 | 0.00 | 0.84 | 1.00 |
| 6.84_312.2197  | 0.00 | 0.00 | 0.52 | 1.00 |
| 7.24_312.2197  | 0.00 | 0.00 | 0.62 | 1.00 |
| 10.59_311.1859 | 0.00 | 0.00 | 0.65 | 1.00 |
| 9.79_311.0549  | 0.00 | 0.00 | 0.57 | 1.00 |
| 7.47_310.2026  | 0.00 | 0.00 | 1.00 | 0.56 |
| 5.82_322.1007  | 0.00 | 0.00 | 0.89 | 1.00 |
| 1.74_322.0446  | 0.00 | 0.03 | 0.90 | 1.00 |
| 3.86_320.0995  | 0.00 | 0.00 | 0.64 | 1.00 |
| 9.13_319.1539  | 0.00 | 0.00 | 0.60 | 1.00 |
| 6.92_318.2094  | 0.00 | 0.00 | 0.76 | 1.00 |
| 5.91_328.5999  | 0.00 | 0.00 | 0.65 | 1.00 |
| 7.34_326.2353  | 0.00 | 0.00 | 0.58 | 1.00 |
| 6.01_326.2353  | 0.00 | 0.00 | 0.79 | 1.00 |
| 4.97_326.0999  | 0.00 | 0.23 | 0.83 | 1.00 |
| 6.08_324.1828  | 0.00 | 0.09 | 0.64 | 1.00 |
| 6.31_335.7452  | 0.00 | 0.00 | 1.00 | 0.52 |
| 6.62_334.2005  | 0.00 | 0.00 | 0.50 | 1.00 |
| 5.84_341.1007  | 0.00 | 0.00 | 0.59 | 1.00 |
| 5.99_338.1374  | 0.00 | 0.00 | 1.00 | 0.77 |
| 6.22_346.2031  | 0.00 | 0.00 | 1.00 | 0.86 |
| 7.48_345.1875  | 0.00 | 0.00 | 0.84 | 1.00 |
| 7.37_344.2218  | 0.00 | 0.00 | 0.66 | 1.00 |
| 5.26_354.0787  | 0.00 | 0.32 | 1.00 | 0.94 |
| 8.24_352.2057  | 0.00 | 0.00 | 0.54 | 1.00 |



## D. Mass Spectral Data for Selected Features

|                |      |      |      |      |
|----------------|------|------|------|------|
| 6.67_362.2335  | 0.00 | 0.00 | 1.00 | 0.86 |
| 6.51_360.2165  | 0.00 | 0.00 | 1.00 | 0.81 |
| 8.53_359.2035  | 0.00 | 0.11 | 0.90 | 1.00 |
| 8.77_368.2219  | 0.00 | 0.00 | 0.73 | 1.00 |
| 6.02_368.2219  | 0.00 | 0.04 | 0.72 | 1.00 |
| 7.52_368.2211  | 0.00 | 0.00 | 0.90 | 1.00 |
| 9.80_367.0822  | 0.00 | 0.00 | 0.66 | 1.00 |
| 5.64_366.2063  | 0.00 | 0.00 | 0.71 | 1.00 |
| 8.47_382.2398  | 0.00 | 0.00 | 0.89 | 1.00 |
| 7.30_389.1593  | 0.00 | 0.00 | 1.00 | 0.89 |
| 9.80_387.0731  | 0.00 | 0.00 | 0.56 | 1.00 |
| 6.88_386.2329  | 0.00 | 0.00 | 0.66 | 1.00 |
| 6.24_384.2171  | 0.00 | 0.00 | 0.70 | 1.00 |
| 8.63_398.2317  | 0.00 | 0.00 | 0.65 | 1.00 |
| 1.49_394.1142  | 0.00 | 0.00 | 0.61 | 1.00 |
| 9.40_418.0851  | 0.00 | 0.00 | 0.59 | 1.00 |
| 8.66_429.0854  | 0.00 | 0.00 | 0.56 | 1.00 |
| 9.08_429.0845  | 0.00 | 0.00 | 0.57 | 1.00 |
| 4.02_423.1940  | 0.00 | 0.00 | 0.61 | 1.00 |
| 9.15_440.0708  | 0.00 | 0.00 | 0.59 | 1.00 |
| 9.42_432.0873  | 0.00 | 0.00 | 0.65 | 1.00 |
| 1.48_431.0890  | 0.00 | 0.41 | 0.98 | 1.00 |
| 9.09_448.0576  | 0.00 | 0.00 | 0.61 | 1.00 |
| 9.73_443.1014  | 0.00 | 0.00 | 0.82 | 1.00 |
| 8.33_443.0954  | 0.00 | 0.00 | 0.93 | 1.00 |
| 8.80_443.0945  | 0.00 | 0.00 | 0.61 | 1.00 |
| 6.90_461.2902  | 0.00 | 0.00 | 0.90 | 1.00 |
| 10.02_459.0960 | 0.00 | 0.00 | 0.58 | 1.00 |
| 9.03_457.1145  | 0.00 | 0.00 | 0.60 | 1.00 |
| 8.67_457.1133  | 0.00 | 0.00 | 0.66 | 1.00 |
| 6.21_455.1906  | 0.00 | 0.16 | 0.86 | 1.00 |
| 9.81_454.0847  | 0.00 | 0.00 | 0.78 | 1.00 |
| 9.05_454.0819  | 0.00 | 0.00 | 0.57 | 1.00 |
| 6.42_472.2832  | 0.00 | 0.00 | 0.75 | 1.00 |
| 6.46_471.2466  | 0.00 | 0.01 | 0.64 | 1.00 |
| 10.02_470.0758 | 0.00 | 0.00 | 0.62 | 1.00 |
| 9.02_468.1011  | 0.00 | 0.00 | 0.58 | 1.00 |
| 9.08_467.0388  | 0.00 | 0.00 | 0.79 | 1.00 |
| 8.31_465.0807  | 0.00 | 0.00 | 0.70 | 1.00 |
| 8.82_465.0807  | 0.00 | 0.00 | 0.67 | 1.00 |
| 9.79_462.0710  | 0.00 | 0.00 | 0.72 | 1.00 |
| 9.04_462.0699  | 0.00 | 0.00 | 0.61 | 1.00 |
| 7.03_483.0939  | 0.00 | 0.00 | 0.72 | 1.00 |
| 9.78_481.0499  | 0.00 | 0.00 | 1.00 | 0.75 |
| 9.02_479.0963  | 0.00 | 0.00 | 0.62 | 1.00 |
| 10.01_478.0692 | 0.00 | 0.00 | 0.53 | 1.00 |
| 4.15_476.2404  | 0.00 | 0.00 | 0.56 | 1.00 |
| 9.02_476.0877  | 0.00 | 0.00 | 0.55 | 1.00 |
| 7.06_475.1057  | 0.00 | 0.00 | 0.61 | 1.00 |
| 9.02_495.0687  | 0.00 | 0.00 | 0.70 | 1.00 |
| 4.37_494.2617  | 0.00 | 0.00 | 0.68 | 1.00 |
| 5.37_493.1709  | 0.00 | 0.00 | 1.00 | 0.69 |
| 9.79_513.1525  | 0.00 | 0.00 | 0.48 | 1.00 |
| 5.64_515.2738  | 0.00 | 0.01 | 0.65 | 1.00 |
| 1.76_515.1445  | 0.00 | 0.00 | 0.74 | 1.00 |
| 10.06_526.3139 | 0.00 | 0.00 | 1.00 | 0.54 |
| 7.21_526.2839  | 0.00 | 0.06 | 0.58 | 1.00 |
| 7.20_544.2918  | 0.00 | 0.00 | 0.61 | 1.00 |
| 9.00_540.1495  | 0.00 | 0.00 | 0.63 | 1.00 |
| 6.63_570.3104  | 0.00 | 0.00 | 0.91 | 1.00 |
| 9.67_563.3802  | 0.00 | 0.00 | 0.59 | 1.00 |
| 9.08_562.5875  | 0.00 | 0.00 | 0.62 | 1.00 |
| 7.14_560.1805  | 0.00 | 0.00 | 0.64 | 1.00 |
| 6.90_555.3068  | 0.00 | 0.00 | 0.53 | 1.00 |
| 1.72_551.1035  | 0.00 | 0.00 | 0.96 | 1.00 |

## D. Mass Spectral Data for Selected Features

|                |      |      |      |      |
|----------------|------|------|------|------|
| 5.52_601.2501  | 0.00 | 0.00 | 0.73 | 1.00 |
| 9.02_590.6205  | 0.00 | 0.00 | 0.63 | 1.00 |
| 9.79_576.6021  | 0.00 | 0.00 | 1.00 | 0.60 |
| 9.06_576.6005  | 0.00 | 0.00 | 0.60 | 1.00 |
| 1.25_639.8836  | 0.00 | 0.00 | 0.63 | 1.00 |
| 9.07_662.0928  | 0.00 | 0.00 | 0.48 | 1.00 |
| 9.02_704.1451  | 0.00 | 0.00 | 0.54 | 1.00 |
| 9.03_696.1548  | 0.00 | 0.00 | 0.49 | 1.00 |
| 9.71_694.1152  | 0.00 | 0.00 | 0.66 | 1.00 |
| 9.03_690.1259  | 0.00 | 0.00 | 0.54 | 1.00 |
| 9.79_683.1204  | 0.00 | 0.00 | 1.00 | 0.68 |
| 9.06_676.1101  | 0.00 | 0.00 | 0.53 | 1.00 |
| 9.41_675.1324  | 0.00 | 0.00 | 0.54 | 1.00 |
| 9.78_885.1896  | 0.00 | 0.00 | 0.47 | 1.00 |
| 9.07_879.1306  | 0.00 | 0.00 | 0.69 | 1.00 |
| 7.69_868.6024  | 0.00 | 0.00 | 1.00 | 0.57 |
| 9.02_935.1961  | 0.00 | 0.00 | 0.53 | 1.00 |
| 7.21_916.0943  | 0.00 | 0.00 | 1.00 | 0.78 |
| 9.80_907.1678  | 0.00 | 0.00 | 0.82 | 1.00 |
| 9.04_907.1662  | 0.00 | 0.00 | 0.51 | 1.00 |
| 9.41_904.1590  | 0.00 | 0.00 | 0.53 | 1.00 |
| 7.67_1031.2480 | 0.00 | 0.14 | 0.97 | 1.00 |
| 7.69_1031.1674 | 0.00 | 0.10 | 1.00 | 0.91 |
| 7.67_1031.0798 | 0.00 | 0.00 | 0.91 | 1.00 |
| 7.69_1000.1273 | 0.00 | 0.00 | 0.49 | 1.00 |
| 7.65_1000.0444 | 0.00 | 0.00 | 0.92 | 1.00 |
| 7.63_942.9948  | 0.00 | 0.00 | 1.00 | 0.90 |
| 7.01_1221.4414 | 0.00 | 0.00 | 0.55 | 1.00 |
| 9.41_1125.2062 | 0.00 | 0.00 | 0.48 | 1.00 |
| 9.78_465.0808  | 0.00 | 0.00 | 0.87 | 1.00 |
| 9.79_1349.2480 | 0.00 | 0.00 | 0.51 | 1.00 |
| 6.06_294.2084  | 0.00 | 0.00 | 0.59 | 1.00 |
| 9.81_269.0437  | 0.00 | 0.00 | 0.61 | 1.00 |
| 8.34_150.0928  | 0.00 | 0.07 | 0.56 | 1.00 |
| 6.65_282.2073  | 0.01 | 0.04 | 0.76 | 1.00 |
| 6.76_310.2021  | 0.01 | 0.00 | 1.00 | 0.90 |
| 8.74_542.3146  | 0.01 | 0.00 | 1.00 | 0.73 |
| 1.75_507.1572  | 0.01 | 0.00 | 0.69 | 1.00 |
| 1.29_203.9309  | 0.01 | 0.00 | 0.50 | 1.00 |
| 5.66_384.2168  | 0.01 | 0.00 | 0.71 | 1.00 |
| 1.64_246.1172  | 0.02 | 0.00 | 0.74 | 1.00 |
| 7.48_177.0877  | 0.02 | 0.00 | 0.60 | 1.00 |
| 1.64_174.0879  | 0.02 | 0.01 | 1.00 | 0.56 |
| 6.66_264.1980  | 0.03 | 0.01 | 0.63 | 1.00 |
| 8.10_301.1534  | 0.03 | 0.11 | 0.90 | 1.00 |
| 5.43_377.1482  | 0.03 | 0.00 | 0.68 | 1.00 |
| 16.15_710.1773 | 0.04 | 0.01 | 0.70 | 1.00 |
| 9.14_239.1284  | 0.04 | 0.04 | 0.59 | 1.00 |
| 6.24_515.2753  | 0.04 | 0.02 | 0.84 | 1.00 |
| 9.66_279.1583  | 0.05 | 0.00 | 0.65 | 1.00 |
| 9.67_319.1539  | 0.05 | 0.06 | 0.64 | 1.00 |
| 1.74_150.0789  | 0.05 | 0.00 | 0.59 | 1.00 |
| 3.22_235.1201  | 0.05 | 0.00 | 1.00 | 0.67 |
| 6.95_368.2220  | 0.05 | 0.09 | 1.00 | 0.59 |
| 8.53_283.1523  | 0.05 | 0.12 | 0.85 | 1.00 |
| 8.29_401.1993  | 0.06 | 0.00 | 0.56 | 1.00 |
| 3.07_230.1126  | 0.06 | 0.14 | 0.82 | 1.00 |
| 4.75_136.0625  | 0.06 | 0.00 | 0.78 | 1.00 |
| 1.73_338.0231  | 0.06 | 0.00 | 0.84 | 1.00 |
| 1.70_260.1135  | 0.08 | 0.00 | 0.75 | 1.00 |
| 8.53_207.1002  | 0.09 | 0.11 | 0.81 | 1.00 |
| 6.95_218.1203  | 0.09 | 0.18 | 0.63 | 1.00 |
| 8.53_177.0880  | 0.09 | 0.09 | 0.84 | 1.00 |
| 7.25_371.1508  | 0.09 | 0.00 | 0.67 | 1.00 |
| 9.41_281.1770  | 0.10 | 0.19 | 0.65 | 1.00 |

## D. Mass Spectral Data for Selected Features

|                |      |      |      |      |
|----------------|------|------|------|------|
| 10.52_673.3745 | 0.12 | 0.19 | 0.63 | 1.00 |
| 10.18_621.4210 | 0.13 | 0.00 | 0.59 | 1.00 |
| 3.86_150.0940  | 0.14 | 0.25 | 0.68 | 1.00 |
| 3.83_198.1623  | 0.14 | 0.10 | 0.57 | 1.00 |
| 1.77_218.1042  | 0.14 | 0.03 | 0.70 | 1.00 |
| 3.80_288.1929  | 0.15 | 0.13 | 1.00 | 0.77 |
| 6.41_165.0905  | 0.17 | 0.11 | 0.78 | 1.00 |
| 3.86_338.1113  | 0.19 | 0.00 | 0.65 | 1.00 |
| 4.31_265.0552  | 0.19 | 0.00 | 0.80 | 1.00 |
| 1.65_159.0768  | 0.21 | 0.00 | 1.00 | 0.65 |
| 1.73_288.1454  | 0.21 | 0.00 | 0.85 | 1.00 |
| 5.97_286.6247  | 0.22 | 0.04 | 1.00 | 0.66 |
| 4.30_478.1379  | 0.22 | 0.05 | 0.76 | 1.00 |
| 3.85_276.1433  | 0.22 | 0.13 | 0.58 | 1.00 |
| 4.87_329.1844  | 0.23 | 0.00 | 0.80 | 1.00 |
| 7.91_389.2523  | 0.23 | 0.10 | 0.63 | 1.00 |
| 7.89_192.1015  | 0.23 | 0.40 | 0.74 | 1.00 |
| 6.72_1450.6973 | 0.25 | 0.06 | 0.68 | 1.00 |
| 3.76_347.1589  | 0.28 | 0.00 | 0.76 | 1.00 |
| 16.18_335.9929 | 0.29 | 0.00 | 0.69 | 1.00 |
| 1.60_229.1318  | 0.29 | 0.06 | 0.78 | 1.00 |
| 4.30_310.1305  | 0.29 | 0.06 | 0.71 | 1.00 |
| 5.97_278.6345  | 0.30 | 0.08 | 1.00 | 0.95 |
| 9.11_505.3321  | 0.33 | 0.00 | 0.70 | 1.00 |
| 9.47_211.0868  | 0.34 | 0.59 | 1.00 | 0.98 |
| 3.82_230.1126  | 0.34 | 0.22 | 1.00 | 0.80 |
| 4.00_320.1711  | 0.43 | 0.05 | 0.99 | 1.00 |
| 5.11_307.1591  | 0.44 | 0.00 | 1.00 | 0.92 |
| 4.81_464.2611  | 0.44 | 0.52 | 1.00 | 0.80 |
| 4.86_372.1909  | 0.49 | 0.25 | 0.81 | 1.00 |
| 10.60_346.3091 | 0.51 | 1.00 | 0.00 | 0.00 |
| 10.40_371.3275 | 0.52 | 1.00 | 0.00 | 0.00 |
| 10.70_288.2557 | 0.52 | 1.00 | 0.00 | 0.00 |
| 4.64_137.0376  | 0.53 | 0.55 | 0.84 | 1.00 |
| 9.48_225.1993  | 0.53 | 1.00 | 0.01 | 0.02 |
| 7.06_203.1787  | 0.53 | 1.00 | 0.01 | 0.00 |
| 4.26_669.2631  | 0.56 | 1.00 | 0.00 | 0.00 |
| 11.80_235.1712 | 0.56 | 1.00 | 0.00 | 0.04 |
| 10.15_739.4618 | 0.56 | 1.00 | 0.06 | 0.05 |
| 14.41_309.2409 | 0.56 | 1.00 | 0.14 | 0.13 |
| 10.53_531.4000 | 0.57 | 1.00 | 0.00 | 0.00 |
| 12.97_407.3144 | 0.58 | 1.00 | 0.20 | 0.09 |
| 12.98_399.3242 | 0.58 | 1.00 | 0.19 | 0.09 |
| 4.09_573.1785  | 0.58 | 1.00 | 0.00 | 0.00 |
| 4.37_663.2850  | 0.59 | 1.00 | 0.01 | 0.00 |
| 5.45_144.0814  | 0.60 | 1.00 | 0.13 | 0.21 |
| 13.98_433.3418 | 0.61 | 1.00 | 0.02 | 0.01 |
| 4.64_412.2067  | 0.62 | 1.00 | 0.08 | 0.10 |
| 6.19_181.1351  | 0.63 | 1.00 | 0.09 | 0.11 |
| 10.97_401.2525 | 0.63 | 1.00 | 0.00 | 0.00 |
| 11.58_415.2745 | 0.65 | 1.00 | 0.00 | 0.00 |
| 12.62_273.1378 | 0.66 | 1.00 | 0.00 | 0.00 |
| 12.86_507.3281 | 0.66 | 1.00 | 0.37 | 0.22 |
| 4.27_647.2871  | 0.67 | 1.00 | 0.00 | 0.01 |
| 12.82_551.3593 | 0.67 | 1.00 | 0.38 | 0.32 |
| 11.44_223.2060 | 0.67 | 1.00 | 0.00 | 0.00 |
| 8.08_219.1411  | 0.68 | 1.00 | 0.00 | 0.00 |
| 12.56_441.2657 | 0.70 | 1.00 | 0.24 | 0.35 |
| 6.85_824.9348  | 0.70 | 1.00 | 0.00 | 0.00 |
| 4.81_506.2950  | 0.71 | 1.00 | 0.24 | 0.26 |
| 16.15_442.8736 | 0.71 | 1.00 | 0.00 | 0.00 |
| 7.07_184.1710  | 0.72 | 1.00 | 0.00 | 0.00 |
| 4.37_150.0945  | 0.72 | 1.00 | 0.00 | 0.00 |
| 12.79_595.3829 | 0.73 | 1.00 | 0.46 | 0.37 |
| 12.67_727.4605 | 0.74 | 1.00 | 0.22 | 0.33 |

## D. Mass Spectral Data for Selected Features

|                |      |      |      |      |
|----------------|------|------|------|------|
| 11.18_473.3585 | 0.75 | 1.00 | 0.04 | 0.01 |
| 4.34_266.1408  | 0.75 | 0.59 | 0.98 | 1.00 |
| 12.70_683.4373 | 0.77 | 1.00 | 0.48 | 0.36 |
| 12.86_463.2998 | 0.77 | 1.00 | 0.48 | 0.31 |
| 12.74_443.3505 | 0.77 | 1.00 | 0.00 | 0.00 |
| 12.97_547.4060 | 0.77 | 1.00 | 0.38 | 0.19 |
| 13.86_425.2896 | 0.78 | 1.00 | 0.30 | 0.28 |
| 5.26_147.0936  | 0.79 | 1.00 | 0.25 | 0.37 |
| 12.61_771.4862 | 0.80 | 1.00 | 0.47 | 0.38 |
| 11.97_299.2600 | 0.80 | 1.00 | 0.00 | 0.00 |
| 12.86_502.3745 | 0.82 | 1.00 | 0.34 | 0.33 |
| 11.84_443.3878 | 0.82 | 1.00 | 0.09 | 0.05 |
| 11.03_354.1608 | 0.82 | 1.00 | 0.00 | 0.04 |
| 11.28_440.3462 | 0.82 | 1.00 | 0.00 | 0.00 |
| 12.98_282.2118 | 0.82 | 1.00 | 0.14 | 0.03 |
| 12.73_655.3845 | 0.83 | 1.00 | 0.56 | 0.44 |
| 12.74_639.4067 | 0.83 | 1.00 | 0.51 | 0.39 |
| 13.79_365.2675 | 0.84 | 1.00 | 0.05 | 0.00 |
| 12.80_567.3292 | 0.85 | 1.00 | 0.55 | 0.36 |
| 12.83_546.4021 | 0.86 | 1.00 | 0.00 | 0.24 |
| 5.16_237.1592  | 0.87 | 1.00 | 0.21 | 0.29 |
| 10.38_401.3397 | 0.88 | 1.00 | 0.50 | 0.32 |
| 9.26_219.1735  | 0.88 | 1.00 | 0.00 | 0.00 |
| 12.67_743.4367 | 0.88 | 1.00 | 0.54 | 0.53 |
| 4.50_359.1197  | 0.89 | 1.00 | 0.00 | 0.00 |
| 14.79_310.3109 | 0.90 | 1.00 | 0.51 | 0.53 |
| 12.78_611.3565 | 0.91 | 1.00 | 0.63 | 0.53 |
| 15.94_338.3442 | 0.91 | 1.00 | 0.32 | 0.34 |
| 13.49_295.2258 | 0.91 | 1.00 | 0.08 | 0.03 |
| 1.47_508.0657  | 0.91 | 1.00 | 0.60 | 0.39 |
| 1.50_260.0296  | 0.92 | 1.00 | 0.58 | 0.26 |
| 1.47_748.1127  | 0.94 | 1.00 | 0.76 | 0.59 |
| 4.29_244.1199  | 0.97 | 1.00 | 0.42 | 0.49 |
| 4.49_225.1597  | 0.97 | 1.00 | 0.49 | 0.50 |
| 12.89_441.3208 | 0.99 | 1.00 | 0.40 | 0.25 |
| 12.78_590.4295 | 1.00 | 1.00 | 0.40 | 0.33 |
| 13.95_270.2746 | 1.00 | 1.00 | 0.31 | 0.41 |
| 3.99_164.0936  | 1.00 | 0.90 | 0.41 | 0.45 |
| 10.36_211.6353 | 1.00 | 0.89 | 0.60 | 0.50 |
| 11.31_225.6512 | 1.00 | 0.95 | 0.26 | 0.18 |
| 9.27_240.2315  | 1.00 | 0.88 | 0.00 | 0.11 |
| 4.59_251.1399  | 1.00 | 0.99 | 0.81 | 0.84 |
| 10.39_268.2627 | 1.00 | 0.83 | 0.00 | 0.00 |
| 11.44_291.1951 | 1.00 | 0.75 | 0.00 | 0.00 |
| 11.33_299.2599 | 1.00 | 0.77 | 0.00 | 0.00 |
| 12.62_313.2746 | 1.00 | 0.83 | 0.00 | 0.00 |
| 14.31_325.2414 | 1.00 | 0.74 | 0.00 | 0.00 |
| 14.82_332.2940 | 1.00 | 0.65 | 0.00 | 0.20 |
| 4.25_343.1235  | 1.00 | 0.70 | 0.01 | 0.00 |
| 15.49_338.3442 | 1.00 | 0.86 | 0.00 | 0.03 |
| 4.42_351.1212  | 1.00 | 0.79 | 0.09 | 0.14 |
| 4.39_362.1069  | 1.00 | 0.88 | 0.00 | 0.08 |
| 15.92_360.3229 | 1.00 | 0.71 | 0.22 | 0.13 |
| 13.48_397.3392 | 1.00 | 0.75 | 0.00 | 0.01 |
| 10.78_415.3581 | 1.00 | 0.61 | 0.36 | 0.19 |
| 13.95_411.3586 | 1.00 | 0.78 | 0.00 | 0.00 |
| 13.27_419.3131 | 1.00 | 0.81 | 0.00 | 0.00 |
| 12.86_485.3471 | 1.00 | 0.86 | 0.31 | 0.23 |
| 1.45_519.0543  | 1.00 | 0.72 | 0.41 | 0.18 |
| 12.81_529.3766 | 1.00 | 0.77 | 0.31 | 0.19 |
| 12.97_555.3910 | 1.00 | 0.94 | 0.56 | 0.33 |
| 12.79_573.4039 | 1.00 | 0.73 | 0.29 | 0.21 |
| 12.75_617.4294 | 1.00 | 0.84 | 0.00 | 0.25 |
| 13.92_641.5490 | 1.00 | 0.85 | 0.00 | 0.00 |
| 4.37_685.2548  | 1.00 | 0.86 | 0.00 | 0.00 |

### D. Mass Spectral Data for Selected Features

|                |      |      |      |      |
|----------------|------|------|------|------|
| 12.67_705.4810 | 1.00 | 0.93 | 0.15 | 0.26 |
| 6.87_807.0837  | 1.00 | 0.57 | 0.08 | 0.00 |

## D. Mass Spectral Data for Selected Features

**Table S14.** Normalized heat map of features described as unique in figure 2b and c when comparing wild type *Nocardiosis sp. FU40 ΔApoS8* to the R5 rifampicin resistant mutant extract using OPLS-DA and extracting features from the generated S-plot with correlation coefficients  $\geq 0.9$ . Features are normalized to maximum intensity for that feature.

| Feature ID (RT_m/z) | WT   | WT   | R5   | R5   |
|---------------------|------|------|------|------|
| 12.03_135.1163      | 0.00 | 0.07 | 1.00 | 0.65 |
| 12.03_123.1165      | 0.00 | 0.00 | 1.00 | 0.99 |
| 1.50_103.5345       | 0.00 | 0.00 | 1.00 | 0.70 |
| 6.56_162.0938       | 0.00 | 0.00 | 1.00 | 0.88 |
| 16.16_174.0876      | 0.00 | 0.00 | 0.70 | 1.00 |
| 5.78_170.1204       | 0.00 | 0.00 | 1.00 | 0.77 |
| 7.08_169.0882       | 0.00 | 0.02 | 1.00 | 0.84 |
| 6.60_180.1017       | 0.00 | 0.01 | 0.84 | 1.00 |
| 5.02_180.1014       | 0.00 | 0.00 | 1.00 | 0.74 |
| 4.95_177.1399       | 0.00 | 0.21 | 0.98 | 1.00 |
| 4.39_192.1130       | 0.00 | 0.14 | 1.00 | 0.80 |
| 9.12_191.0134       | 0.00 | 0.00 | 0.93 | 1.00 |
| 4.14_186.1168       | 0.00 | 0.00 | 1.00 | 0.54 |
| 9.08_196.0187       | 0.00 | 0.00 | 1.00 | 0.74 |
| 8.84_203.1804       | 0.00 | 0.00 | 1.00 | 0.91 |
| 8.12_203.1781       | 0.00 | 0.00 | 0.96 | 1.00 |
| 9.08_203.0278       | 0.00 | 0.00 | 0.99 | 1.00 |
| 9.80_203.0277       | 0.00 | 0.00 | 1.00 | 0.84 |
| 9.42_202.0393       | 0.00 | 0.00 | 1.00 | 0.83 |
| 5.44_208.0539       | 0.00 | 0.01 | 0.66 | 1.00 |
| 7.49_207.0994       | 0.00 | 0.05 | 1.00 | 0.74 |
| 1.30_205.9283       | 0.00 | 0.00 | 1.00 | 0.91 |
| 4.84_205.1323       | 0.00 | 0.00 | 1.00 | 0.96 |
| 1.32_211.8786       | 0.00 | 0.00 | 0.81 | 1.00 |
| 1.49_211.0584       | 0.00 | 0.15 | 0.98 | 1.00 |
| 9.81_210.0363       | 0.00 | 0.00 | 1.00 | 0.85 |
| 9.07_210.0305       | 0.00 | 0.00 | 1.00 | 0.67 |
| 9.41_219.0312       | 0.00 | 0.00 | 0.67 | 1.00 |
| 3.69_218.1136       | 0.00 | 0.32 | 1.00 | 0.78 |
| 8.84_221.1903       | 0.00 | 0.00 | 1.00 | 0.98 |
| 7.35_225.1140       | 0.00 | 0.00 | 0.67 | 1.00 |
| 7.99_225.1125       | 0.00 | 0.03 | 1.00 | 0.60 |
| 7.49_230.0712       | 0.00 | 0.00 | 0.82 | 1.00 |
| 5.48_229.0656       | 0.00 | 0.00 | 1.00 | 0.91 |
| 9.82_230.0718       | 0.00 | 0.09 | 1.00 | 0.74 |
| 5.11_236.1306       | 0.00 | 0.13 | 1.00 | 0.67 |
| 4.89_235.1441       | 0.00 | 0.00 | 1.00 | 0.71 |
| 8.54_235.1344       | 0.00 | 0.00 | 0.83 | 1.00 |
| 4.13_237.1268       | 0.00 | 0.17 | 1.00 | 0.82 |
| 7.33_247.0943       | 0.00 | 0.25 | 1.00 | 0.90 |
| 5.04_244.1219       | 0.00 | 0.00 | 1.00 | 0.62 |
| 4.31_249.0807       | 0.00 | 0.00 | 0.96 | 1.00 |
| 8.08_252.0397       | 0.00 | 0.00 | 1.00 | 0.86 |
| 4.56_252.0394       | 0.00 | 0.21 | 0.86 | 1.00 |
| 6.01_252.0391       | 0.00 | 0.00 | 1.00 | 0.87 |
| 5.12_252.0389       | 0.00 | 0.00 | 0.90 | 1.00 |
| 7.48_252.0388       | 0.00 | 0.00 | 1.00 | 0.91 |
| 6.23_258.1449       | 0.00 | 0.00 | 1.00 | 0.57 |
| 12.02_263.1978      | 0.00 | 0.03 | 1.00 | 0.93 |
| 1.78_262.1278       | 0.00 | 0.00 | 0.63 | 1.00 |
| 5.86_262.1048       | 0.00 | 0.17 | 1.00 | 0.77 |
| 5.01_261.1438       | 0.00 | 0.03 | 0.85 | 1.00 |
| 7.18_278.2110       | 0.00 | 0.00 | 1.00 | 0.75 |
| 6.07_276.1943       | 0.00 | 0.00 | 0.85 | 1.00 |
| 7.50_283.1523       | 0.00 | 0.03 | 0.83 | 1.00 |
| 7.72_281.1420       | 0.00 | 0.00 | 0.90 | 1.00 |
| 5.22_295.1312       | 0.00 | 0.01 | 0.56 | 1.00 |
| 7.48_294.2085       | 0.00 | 0.00 | 0.58 | 1.00 |
| 7.82_294.2085       | 0.00 | 0.00 | 1.00 | 1.00 |
| 1.50_294.0959       | 0.00 | 0.44 | 1.00 | 0.85 |
| 7.15_293.2251       | 0.00 | 0.00 | 1.00 | 0.51 |
| 4.87_293.1612       | 0.00 | 0.19 | 0.73 | 1.00 |
| 7.73_298.2024       | 0.00 | 0.00 | 0.75 | 1.00 |
| 7.19_296.2224       | 0.00 | 0.00 | 1.00 | 0.93 |

## D. Mass Spectral Data for Selected Features

|                |      |      |      |      |
|----------------|------|------|------|------|
| 5.83_303.1558  | 0.00 | 0.01 | 1.00 | 0.88 |
| 7.70_303.1206  | 0.00 | 0.09 | 1.00 | 0.65 |
| 3.78_300.1386  | 0.00 | 0.03 | 1.00 | 0.51 |
| 12.02_309.1921 | 0.00 | 0.01 | 0.89 | 1.00 |
| 6.00_308.2238  | 0.00 | 0.00 | 1.00 | 0.86 |
| 6.84_312.2197  | 0.00 | 0.00 | 1.00 | 0.97 |
| 7.24_312.2197  | 0.00 | 0.00 | 1.00 | 0.93 |
| 7.47_310.2026  | 0.00 | 0.00 | 0.99 | 1.00 |
| 1.74_322.0446  | 0.00 | 0.03 | 0.56 | 1.00 |
| 6.92_318.2094  | 0.00 | 0.00 | 0.58 | 1.00 |
| 7.34_326.2353  | 0.00 | 0.00 | 0.84 | 1.00 |
| 6.01_326.2353  | 0.00 | 0.00 | 0.99 | 1.00 |
| 12.03_325.1706 | 0.00 | 0.00 | 1.00 | 0.93 |
| 6.08_324.1828  | 0.00 | 0.31 | 0.99 | 1.00 |
| 5.99_338.1374  | 0.00 | 0.00 | 0.92 | 1.00 |
| 6.07_337.1394  | 0.00 | 0.03 | 0.55 | 1.00 |
| 10.06_348.2310 | 0.00 | 0.00 | 0.79 | 1.00 |
| 5.19_344.6196  | 0.00 | 0.23 | 0.89 | 1.00 |
| 6.06_359.1205  | 0.00 | 0.00 | 0.98 | 1.00 |
| 5.26_354.0787  | 0.00 | 0.13 | 0.78 | 1.00 |
| 8.24_352.2057  | 0.00 | 0.00 | 0.92 | 1.00 |
| 4.01_351.5992  | 0.00 | 0.00 | 0.64 | 1.00 |
| 6.51_360.2165  | 0.00 | 0.00 | 0.56 | 1.00 |
| 8.77_368.2219  | 0.00 | 0.00 | 0.60 | 1.00 |
| 7.52_368.2211  | 0.00 | 0.00 | 1.00 | 0.74 |
| 7.83_387.1861  | 0.00 | 0.00 | 1.00 | 0.55 |
| 6.88_386.2329  | 0.00 | 0.02 | 0.60 | 1.00 |
| 6.89_384.2172  | 0.00 | 0.01 | 1.00 | 0.84 |
| 6.24_384.2171  | 0.00 | 0.00 | 1.00 | 0.64 |
| 1.49_394.1142  | 0.00 | 0.00 | 1.00 | 0.99 |
| 3.74_416.1928  | 0.00 | 0.01 | 1.00 | 0.70 |
| 3.75_414.2692  | 0.00 | 0.00 | 1.00 | 0.76 |
| 8.66_429.0854  | 0.00 | 0.00 | 0.93 | 1.00 |
| 9.08_429.0845  | 0.00 | 0.00 | 0.52 | 1.00 |
| 9.07_451.0615  | 0.00 | 0.00 | 1.00 | 0.76 |
| 9.09_448.0576  | 0.00 | 0.00 | 1.00 | 0.77 |
| 9.73_443.1014  | 0.00 | 0.00 | 0.77 | 1.00 |
| 8.33_443.0954  | 0.00 | 0.00 | 0.81 | 1.00 |
| 5.90_459.3212  | 0.00 | 0.02 | 0.69 | 1.00 |
| 9.03_457.1145  | 0.00 | 0.01 | 0.76 | 1.00 |
| 8.67_457.1133  | 0.00 | 0.00 | 1.00 | 0.97 |
| 11.52_456.3791 | 0.00 | 0.00 | 0.86 | 1.00 |
| 6.21_455.1906  | 0.00 | 0.11 | 1.00 | 0.75 |
| 9.81_454.0847  | 0.00 | 0.00 | 0.67 | 1.00 |
| 9.05_454.0819  | 0.00 | 0.00 | 0.79 | 1.00 |
| 6.42_472.2832  | 0.00 | 0.00 | 1.00 | 0.67 |
| 9.08_467.0388  | 0.00 | 0.00 | 0.94 | 1.00 |
| 8.82_465.0807  | 0.00 | 0.00 | 1.00 | 0.90 |
| 9.79_462.0710  | 0.00 | 0.00 | 0.79 | 1.00 |
| 9.04_462.0699  | 0.00 | 0.00 | 1.00 | 0.86 |
| 9.78_481.0499  | 0.00 | 0.00 | 1.00 | 1.00 |
| 4.15_476.2404  | 0.00 | 0.00 | 1.00 | 0.57 |
| 7.51_499.2782  | 0.00 | 0.02 | 0.93 | 1.00 |
| 5.37_493.1709  | 0.00 | 0.00 | 1.00 | 0.81 |
| 6.65_512.8485  | 0.00 | 0.00 | 1.00 | 0.82 |
| 5.65_504.2609  | 0.00 | 0.00 | 1.00 | 0.90 |
| 5.64_515.2738  | 0.00 | 0.03 | 1.00 | 1.00 |
| 1.76_515.1445  | 0.00 | 0.00 | 1.00 | 0.96 |
| 10.06_526.3139 | 0.00 | 0.00 | 0.60 | 1.00 |
| 7.21_526.2839  | 0.00 | 0.06 | 1.00 | 0.82 |
| 6.79_549.3505  | 0.00 | 0.00 | 1.00 | 0.52 |
| 7.20_544.2918  | 0.00 | 0.00 | 0.56 | 1.00 |
| 7.57_542.3960  | 0.00 | 0.01 | 1.00 | 0.67 |
| 6.63_570.3104  | 0.00 | 0.00 | 1.00 | 0.87 |
| 12.03_565.3746 | 0.00 | 0.00 | 1.00 | 0.87 |
| 9.67_563.3802  | 0.00 | 0.00 | 1.00 | 0.88 |
| 6.90_555.3068  | 0.00 | 0.00 | 0.84 | 1.00 |
| 5.52_601.2501  | 0.00 | 0.00 | 1.00 | 0.77 |
| 9.79_576.6021  | 0.00 | 0.00 | 0.51 | 1.00 |
| 9.06_576.6005  | 0.00 | 0.00 | 0.51 | 1.00 |

## D. Mass Spectral Data for Selected Features

|                |      |      |      |      |
|----------------|------|------|------|------|
| 1.25_639.8836  | 0.00 | 0.00 | 1.00 | 0.75 |
| 6.02_637.3187  | 0.00 | 0.00 | 1.00 | 0.97 |
| 5.79_646.1977  | 0.00 | 0.00 | 0.82 | 1.00 |
| 9.79_683.1204  | 0.00 | 0.00 | 0.81 | 1.00 |
| 9.80_907.1678  | 0.00 | 0.00 | 0.84 | 1.00 |
| 7.01_1221.4414 | 0.00 | 0.00 | 0.65 | 1.00 |
| 7.00_1216.1209 | 0.00 | 0.37 | 0.79 | 1.00 |
| 9.79_218.0234  | 0.00 | 0.02 | 0.98 | 1.00 |
| 8.34_150.0928  | 0.00 | 0.04 | 0.66 | 1.00 |
| 9.78_465.0808  | 0.00 | 0.01 | 1.00 | 0.94 |
| 6.76_310.2021  | 0.01 | 0.00 | 1.00 | 0.98 |
| 7.48_177.0877  | 0.01 | 0.00 | 1.00 | 0.72 |
| 8.10_301.1534  | 0.01 | 0.03 | 1.00 | 0.87 |
| 1.75_507.1572  | 0.01 | 0.00 | 0.61 | 1.00 |
| 1.82_228.1004  | 0.01 | 0.00 | 0.88 | 1.00 |
| 6.06_294.2084  | 0.02 | 0.00 | 1.00 | 0.70 |
| 6.24_515.2753  | 0.02 | 0.01 | 0.83 | 1.00 |
| 8.74_542.3146  | 0.02 | 0.00 | 0.73 | 1.00 |
| 7.06_325.1861  | 0.02 | 0.14 | 1.00 | 0.86 |
| 6.65_282.2073  | 0.03 | 0.15 | 1.00 | 0.69 |
| 5.43_377.1482  | 0.03 | 0.00 | 1.00 | 0.87 |
| 8.29_401.1993  | 0.03 | 0.00 | 0.83 | 1.00 |
| 1.64_174.0879  | 0.03 | 0.02 | 0.97 | 1.00 |
| 4.75_136.0625  | 0.03 | 0.00 | 1.00 | 0.69 |
| 9.66_279.1583  | 0.04 | 0.00 | 1.00 | 0.61 |
| 1.53_143.0837  | 0.04 | 0.05 | 1.00 | 0.81 |
| 5.66_384.2168  | 0.04 | 0.00 | 1.00 | 0.86 |
| 6.95_218.1203  | 0.04 | 0.09 | 0.92 | 1.00 |
| 3.22_235.1201  | 0.05 | 0.00 | 1.00 | 0.97 |
| 1.73_338.0231  | 0.05 | 0.00 | 1.00 | 0.76 |
| 7.06_221.1900  | 0.06 | 0.17 | 0.71 | 1.00 |
| 7.42_280.1237  | 0.06 | 0.16 | 0.65 | 1.00 |
| 8.53_283.1523  | 0.06 | 0.13 | 0.91 | 1.00 |
| 3.86_150.0940  | 0.06 | 0.11 | 1.00 | 0.97 |
| 6.66_264.1980  | 0.06 | 0.03 | 1.00 | 0.75 |
| 8.53_177.0880  | 0.06 | 0.06 | 1.00 | 0.58 |
| 7.80_291.1290  | 0.06 | 0.23 | 1.00 | 0.93 |
| 10.52_673.3745 | 0.07 | 0.10 | 0.94 | 1.00 |
| 8.53_207.1002  | 0.07 | 0.08 | 1.00 | 0.70 |
| 3.75_289.1389  | 0.07 | 0.31 | 1.00 | 0.93 |
| 9.67_319.1539  | 0.07 | 0.10 | 0.74 | 1.00 |
| 1.77_218.1042  | 0.07 | 0.02 | 1.00 | 0.92 |
| 3.83_198.1623  | 0.08 | 0.06 | 0.84 | 1.00 |
| 4.88_188.0708  | 0.08 | 0.14 | 1.00 | 0.91 |
| 7.06_203.1787  | 0.08 | 0.15 | 1.00 | 0.89 |
| 4.37_326.1802  | 0.08 | 0.50 | 1.00 | 0.91 |
| 6.72_1450.6973 | 0.09 | 0.02 | 1.00 | 0.94 |
| 6.06_203.1781  | 0.10 | 0.18 | 1.00 | 0.98 |
| 4.30_310.1305  | 0.11 | 0.02 | 1.00 | 0.55 |
| 4.87_329.1844  | 0.12 | 0.00 | 1.00 | 0.85 |
| 6.41_165.0905  | 0.14 | 0.09 | 1.00 | 0.83 |
| 9.47_211.0868  | 0.15 | 0.25 | 1.00 | 0.91 |
| 9.14_239.1284  | 0.16 | 0.15 | 1.00 | 0.77 |
| 5.27_685.1761  | 0.17 | 0.00 | 1.00 | 0.82 |
| 5.83_325.1311  | 0.17 | 0.00 | 1.00 | 0.98 |
| 4.26_450.2439  | 0.19 | 0.01 | 0.78 | 1.00 |
| 1.65_159.0768  | 0.19 | 0.00 | 0.78 | 1.00 |
| 7.89_192.1015  | 0.20 | 0.35 | 1.00 | 0.96 |
| 16.18_335.9929 | 0.22 | 0.00 | 0.93 | 1.00 |
| 4.30_284.1098  | 0.24 | 0.07 | 1.00 | 0.94 |
| 5.20_239.1759  | 0.24 | 0.39 | 1.00 | 0.97 |
| 3.85_258.1333  | 0.24 | 0.00 | 1.00 | 0.62 |
| 4.86_372.1909  | 0.25 | 0.13 | 1.00 | 0.74 |
| 6.60_152.1087  | 0.25 | 0.46 | 1.00 | 0.93 |
| 4.63_149.1104  | 0.26 | 0.41 | 1.00 | 0.94 |
| 5.34_191.1575  | 0.26 | 0.37 | 1.00 | 0.71 |
| 5.19_249.1604  | 0.27 | 0.43 | 1.00 | 0.87 |
| 1.73_288.1454  | 0.27 | 0.00 | 1.00 | 0.81 |
| 4.00_320.1711  | 0.28 | 0.03 | 1.00 | 0.79 |
| 3.80_194.0821  | 0.29 | 0.00 | 1.00 | 0.95 |



## D. Mass Spectral Data for Selected Features

|                |      |      |      |      |
|----------------|------|------|------|------|
| 9.41_281.1770  | 0.29 | 0.54 | 0.95 | 1.00 |
| 7.15_504.8508  | 0.30 | 0.59 | 1.00 | 0.91 |
| 16.22_252.0441 | 0.30 | 0.53 | 1.00 | 0.96 |
| 6.74_1160.9454 | 0.31 | 0.26 | 0.83 | 1.00 |
| 4.34_266.1408  | 0.31 | 0.24 | 1.00 | 0.72 |
| 5.00_152.1079  | 0.33 | 0.50 | 1.00 | 0.84 |
| 6.78_176.0714  | 0.33 | 0.56 | 1.00 | 0.97 |
| 6.62_297.1617  | 0.33 | 0.59 | 1.00 | 0.88 |
| 5.16_237.1592  | 0.33 | 0.38 | 1.00 | 0.79 |
| 16.15_365.1085 | 0.34 | 0.00 | 1.00 | 0.82 |
| 3.82_230.1126  | 0.34 | 0.21 | 1.00 | 0.74 |
| 8.22_220.1332  | 0.34 | 0.49 | 0.95 | 1.00 |
| 4.53_236.1764  | 0.34 | 0.44 | 1.00 | 0.95 |
| 5.78_164.0706  | 0.34 | 0.46 | 0.98 | 1.00 |
| 4.77_179.0472  | 0.34 | 0.62 | 1.00 | 1.00 |
| 4.64_137.0376  | 0.35 | 0.36 | 0.95 | 1.00 |
| 4.40_158.0302  | 0.36 | 0.27 | 1.00 | 0.94 |
| 5.71_249.1598  | 0.38 | 0.52 | 1.00 | 0.89 |
| 6.15_485.2027  | 0.38 | 0.41 | 1.00 | 0.84 |
| 5.81_605.2195  | 0.39 | 0.55 | 1.00 | 0.88 |
| 4.70_221.1315  | 0.39 | 0.58 | 0.99 | 1.00 |
| 3.81_136.0628  | 0.40 | 0.64 | 1.00 | 0.86 |
| 4.16_256.1718  | 0.40 | 0.55 | 1.00 | 0.87 |
| 4.66_304.1776  | 0.42 | 0.62 | 1.00 | 0.90 |
| 5.16_210.1137  | 0.43 | 0.42 | 1.00 | 0.82 |
| 16.17_188.9130 | 0.43 | 0.00 | 1.00 | 0.88 |
| 16.18_204.8884 | 0.44 | 0.00 | 0.99 | 1.00 |
| 4.67_270.1917  | 0.44 | 0.60 | 1.00 | 0.97 |
| 3.94_254.1629  | 0.45 | 0.17 | 1.00 | 0.90 |
| 6.34_469.2088  | 0.49 | 0.63 | 1.00 | 0.87 |
| 4.39_362.1069  | 0.49 | 0.43 | 0.99 | 1.00 |
| 6.23_251.1781  | 0.49 | 0.54 | 1.00 | 0.87 |
| 12.43_386.2820 | 0.50 | 1.00 | 0.00 | 0.00 |
| 14.78_323.2583 | 0.50 | 1.00 | 0.00 | 0.00 |
| 13.49_420.3478 | 0.51 | 1.00 | 0.00 | 0.00 |
| 10.60_346.3091 | 0.51 | 1.00 | 0.00 | 0.00 |
| 13.00_413.3095 | 0.52 | 1.00 | 0.00 | 0.00 |
| 10.40_371.3275 | 0.52 | 1.00 | 0.00 | 0.03 |
| 10.70_288.2557 | 0.52 | 1.00 | 0.00 | 0.00 |
| 9.48_225.1993  | 0.53 | 1.00 | 0.00 | 0.02 |
| 6.81_807.1918  | 0.54 | 1.00 | 0.00 | 0.00 |
| 13.53_339.2529 | 0.55 | 1.00 | 0.00 | 0.00 |
| 4.26_669.2631  | 0.56 | 1.00 | 0.00 | 0.13 |
| 11.80_235.1712 | 0.56 | 1.00 | 0.06 | 0.07 |
| 10.15_739.4618 | 0.56 | 1.00 | 0.06 | 0.04 |
| 14.41_309.2409 | 0.56 | 1.00 | 0.00 | 0.00 |
| 12.99_526.2341 | 0.56 | 1.00 | 0.00 | 0.06 |
| 10.53_531.4000 | 0.57 | 1.00 | 0.00 | 0.00 |
| 4.81_415.2090  | 0.57 | 0.40 | 1.00 | 0.89 |
| 12.97_407.3144 | 0.58 | 1.00 | 0.00 | 0.00 |
| 6.02_274.1066  | 0.58 | 0.40 | 1.00 | 0.86 |
| 12.98_399.3242 | 0.58 | 1.00 | 0.00 | 0.00 |
| 4.09_573.1785  | 0.58 | 1.00 | 0.00 | 0.00 |
| 12.98_510.2581 | 0.59 | 1.00 | 0.00 | 0.11 |
| 4.37_663.2850  | 0.59 | 1.00 | 0.00 | 0.20 |
| 4.59_251.1399  | 0.60 | 0.60 | 1.00 | 0.90 |
| 13.98_433.3418 | 0.61 | 1.00 | 0.00 | 0.00 |
| 6.90_166.0720  | 0.61 | 1.00 | 0.00 | 0.00 |
| 4.64_412.2067  | 0.62 | 1.00 | 0.00 | 0.16 |
| 6.19_181.1351  | 0.63 | 1.00 | 0.00 | 0.07 |
| 10.97_401.2525 | 0.63 | 1.00 | 0.08 | 0.08 |
| 16.14_274.0340 | 0.63 | 0.45 | 1.00 | 0.97 |
| 11.58_415.2745 | 0.65 | 1.00 | 0.00 | 0.00 |
| 12.62_273.1378 | 0.66 | 1.00 | 0.00 | 0.00 |
| 12.86_507.3281 | 0.66 | 1.00 | 0.21 | 0.02 |
| 12.97_290.7254 | 0.66 | 1.00 | 0.00 | 0.00 |
| 4.27_647.2871  | 0.67 | 1.00 | 0.00 | 0.14 |
| 11.44_223.2060 | 0.67 | 1.00 | 0.00 | 0.00 |
| 8.08_219.1411  | 0.68 | 1.00 | 0.22 | 0.18 |
| 4.44_178.1088  | 0.70 | 0.60 | 0.99 | 1.00 |

### D. Mass Spectral Data for Selected Features

|                |      |      |      |      |
|----------------|------|------|------|------|
| 6.85_824.9348  | 0.70 | 1.00 | 0.00 | 0.00 |
| 4.37_150.0945  | 0.72 | 1.00 | 0.00 | 0.00 |
| 3.89_518.1743  | 0.73 | 1.00 | 0.00 | 0.00 |
| 11.18_473.3585 | 0.75 | 1.00 | 0.00 | 0.03 |
| 12.86_463.2998 | 0.77 | 1.00 | 0.00 | 0.08 |
| 12.74_443.3505 | 0.77 | 1.00 | 0.00 | 0.01 |
| 12.97_547.4060 | 0.77 | 1.00 | 0.00 | 0.00 |
| 13.86_425.2896 | 0.78 | 1.00 | 0.48 | 0.46 |
| 13.50_409.7445 | 0.80 | 1.00 | 0.00 | 0.04 |
| 4.28_227.1066  | 0.80 | 1.00 | 0.41 | 0.47 |
| 12.61_771.4862 | 0.80 | 1.00 | 0.00 | 0.37 |
| 11.97_299.2600 | 0.80 | 1.00 | 0.03 | 0.00 |
| 13.50_524.2740 | 0.81 | 1.00 | 0.01 | 0.10 |
| 15.06_413.2647 | 0.81 | 1.00 | 0.42 | 0.42 |
| 12.86_502.3745 | 0.82 | 1.00 | 0.36 | 0.00 |
| 11.84_443.3878 | 0.82 | 1.00 | 0.06 | 0.06 |
| 11.03_354.1608 | 0.82 | 1.00 | 0.00 | 0.03 |
| 11.28_440.3462 | 0.82 | 1.00 | 0.00 | 0.00 |
| 12.98_282.2118 | 0.82 | 1.00 | 0.00 | 0.00 |
| 13.79_365.2675 | 0.84 | 1.00 | 0.00 | 0.00 |
| 12.80_567.3292 | 0.85 | 1.00 | 0.00 | 0.00 |
| 10.38_401.3397 | 0.88 | 1.00 | 0.29 | 0.27 |
| 14.79_310.3109 | 0.90 | 1.00 | 0.18 | 0.00 |
| 12.78_611.3565 | 0.91 | 1.00 | 0.21 | 0.57 |
| 13.48_341.2200 | 0.91 | 1.00 | 0.00 | 0.20 |
| 13.49_295.2258 | 0.91 | 1.00 | 0.00 | 0.00 |
| 1.50_260.0296  | 0.92 | 1.00 | 0.30 | 0.47 |
| 4.49_225.1597  | 0.97 | 1.00 | 0.51 | 0.49 |
| 12.89_441.3208 | 0.99 | 1.00 | 0.46 | 0.31 |
| 12.78_590.4295 | 1.00 | 1.00 | 0.25 | 0.00 |
| 3.99_164.0936  | 1.00 | 0.90 | 0.58 | 0.61 |
| 10.36_211.6353 | 1.00 | 0.89 | 0.00 | 0.34 |
| 11.31_225.6512 | 1.00 | 0.95 | 0.00 | 0.00 |
| 5.40_230.0720  | 1.00 | 0.81 | 0.58 | 0.47 |
| 9.27_240.2315  | 1.00 | 0.88 | 0.25 | 0.00 |
| 10.39_268.2627 | 1.00 | 0.83 | 0.00 | 0.00 |
| 12.97_278.2028 | 1.00 | 0.62 | 0.00 | 0.04 |
| 11.44_291.1951 | 1.00 | 0.75 | 0.00 | 0.00 |
| 11.33_299.2599 | 1.00 | 0.77 | 0.00 | 0.00 |
| 12.62_313.2746 | 1.00 | 0.83 | 0.00 | 0.00 |
| 14.31_325.2414 | 1.00 | 0.74 | 0.00 | 0.00 |
| 14.82_332.2940 | 1.00 | 0.65 | 0.27 | 0.10 |
| 15.49_338.3442 | 1.00 | 0.86 | 0.00 | 0.03 |
| 15.92_360.3229 | 1.00 | 0.71 | 0.37 | 0.20 |
| 13.48_397.3392 | 1.00 | 0.75 | 0.00 | 0.00 |
| 10.78_415.3581 | 1.00 | 0.61 | 0.20 | 0.19 |
| 13.95_411.3586 | 1.00 | 0.78 | 0.00 | 0.00 |
| 13.27_419.3131 | 1.00 | 0.81 | 0.00 | 0.00 |
| 10.77_434.3251 | 1.00 | 0.58 | 0.00 | 0.16 |
| 10.98_442.3651 | 1.00 | 0.78 | 0.00 | 0.00 |
| 12.86_485.3471 | 1.00 | 0.86 | 0.19 | 0.41 |
| 12.81_529.3766 | 1.00 | 0.77 | 0.00 | 0.31 |
| 12.97_555.3910 | 1.00 | 0.94 | 0.00 | 0.00 |
| 12.75_617.4294 | 1.00 | 0.84 | 0.20 | 0.41 |
| 13.92_641.5490 | 1.00 | 0.85 | 0.00 | 0.00 |
| 12.67_705.4810 | 1.00 | 0.93 | 0.15 | 0.50 |
| 6.87_807.0837  | 1.00 | 0.57 | 0.19 | 0.00 |

## D. Mass Spectral Data for Selected Features

**Table S15.** Normalized heat map of features described as unique in figure 2b and c when comparing wild type *Nocardiosis sp. FU40 ΔApoS8* to the S1 streptomycin resistant mutant extract using OPLS-DA and extracting features from the generated S-plot with correlation coefficients  $\geq 0.9$ . Features are normalized to maximum intensity for that feature.

| Feature ID (RT_m/z) | WT   | WT   | S1   | S1   |
|---------------------|------|------|------|------|
| 12.03_135.1163      | 0.00 | 0.04 | 0.67 | 1.00 |
| 12.03_123.1165      | 0.00 | 0.00 | 0.66 | 1.00 |
| 4.95_114.0908       | 0.00 | 0.00 | 0.50 | 1.00 |
| 1.50_103.5345       | 0.00 | 0.00 | 0.76 | 1.00 |
| 12.03_149.1327      | 0.00 | 0.00 | 0.66 | 1.00 |
| 13.61_149.0907      | 0.00 | 0.00 | 0.87 | 1.00 |
| 6.56_162.0938       | 0.00 | 0.00 | 1.00 | 0.94 |
| 5.78_170.1204       | 0.00 | 0.00 | 0.73 | 1.00 |
| 4.29_169.0959       | 0.00 | 0.00 | 1.00 | 0.76 |
| 2.44_166.0747       | 0.00 | 0.13 | 0.99 | 1.00 |
| 6.60_180.1017       | 0.00 | 0.03 | 0.85 | 1.00 |
| 9.12_191.0134       | 0.00 | 0.00 | 0.60 | 1.00 |
| 4.14_186.1168       | 0.00 | 0.00 | 1.00 | 0.79 |
| 4.02_198.1143       | 0.00 | 0.00 | 0.72 | 1.00 |
| 8.84_203.1804       | 0.00 | 0.00 | 0.69 | 1.00 |
| 6.22_203.0786       | 0.00 | 0.03 | 0.84 | 1.00 |
| 7.49_207.0994       | 0.00 | 0.08 | 0.88 | 1.00 |
| 1.30_205.9283       | 0.00 | 0.00 | 0.73 | 1.00 |
| 4.84_205.1323       | 0.00 | 0.00 | 0.53 | 1.00 |
| 10.22_205.1232      | 0.00 | 0.00 | 0.91 | 1.00 |
| 1.32_211.8786       | 0.00 | 0.00 | 0.85 | 1.00 |
| 9.81_210.0363       | 0.00 | 0.00 | 0.51 | 1.00 |
| 9.03_217.0413       | 0.00 | 0.00 | 1.00 | 0.82 |
| 16.16_223.9875      | 0.00 | 0.00 | 0.92 | 1.00 |
| 10.24_222.1533      | 0.00 | 0.06 | 0.72 | 1.00 |
| 8.84_221.1903       | 0.00 | 0.00 | 0.78 | 1.00 |
| 5.48_229.0656       | 0.00 | 0.00 | 0.78 | 1.00 |
| 5.11_236.1306       | 0.00 | 0.14 | 0.83 | 1.00 |
| 8.54_235.1344       | 0.00 | 0.00 | 0.81 | 1.00 |
| 11.28_233.1548      | 0.00 | 0.01 | 0.51 | 1.00 |
| 11.16_252.0381      | 0.00 | 0.00 | 0.52 | 1.00 |
| 13.78_251.2405      | 0.00 | 0.00 | 0.96 | 1.00 |
| 11.26_250.1814      | 0.00 | 0.00 | 0.78 | 1.00 |
| 8.08_252.0397       | 0.00 | 0.00 | 1.00 | 0.65 |
| 4.56_252.0394       | 0.00 | 0.17 | 0.90 | 1.00 |
| 5.12_252.0389       | 0.00 | 0.00 | 0.91 | 1.00 |
| 7.48_252.0388       | 0.00 | 0.00 | 0.98 | 1.00 |
| 12.02_263.1978      | 0.00 | 0.03 | 0.71 | 1.00 |
| 5.86_262.1048       | 0.00 | 0.37 | 0.81 | 1.00 |
| 10.71_261.1779      | 0.00 | 0.01 | 0.72 | 1.00 |
| 11.95_266.1298      | 0.00 | 0.00 | 0.66 | 1.00 |
| 5.27_264.2082       | 0.00 | 0.00 | 1.00 | 0.99 |
| 7.50_283.1523       | 0.00 | 0.06 | 0.95 | 1.00 |
| 9.01_283.1521       | 0.00 | 0.09 | 0.88 | 1.00 |
| 1.73_282.0649       | 0.00 | 0.03 | 0.80 | 1.00 |
| 7.15_293.2251       | 0.00 | 0.00 | 0.75 | 1.00 |
| 4.87_293.1612       | 0.00 | 0.33 | 0.74 | 1.00 |
| 6.49_292.1923       | 0.00 | 0.14 | 1.00 | 0.82 |
| 3.78_300.1386       | 0.00 | 0.42 | 0.90 | 1.00 |
| 12.02_309.1921      | 0.00 | 0.01 | 0.61 | 1.00 |
| 14.29_307.2281      | 0.00 | 0.00 | 0.89 | 1.00 |
| 1.74_322.0446       | 0.00 | 0.03 | 0.45 | 1.00 |
| 14.63_321.2420      | 0.00 | 0.00 | 1.00 | 0.91 |
| 12.03_325.1706      | 0.00 | 0.00 | 0.66 | 1.00 |
| 13.85_333.2427      | 0.00 | 0.00 | 1.00 | 0.79 |
| 10.73_340.1475      | 0.00 | 0.10 | 0.81 | 1.00 |
| 14.63_339.2533      | 0.00 | 0.00 | 1.00 | 0.75 |
| 15.50_349.2615      | 0.00 | 0.00 | 1.00 | 0.89 |
| 14.31_347.2205      | 0.00 | 0.00 | 0.78 | 1.00 |
| 7.48_345.1875       | 0.00 | 0.00 | 1.00 | 0.94 |
| 4.01_351.5992       | 0.00 | 0.00 | 1.00 | 0.79 |
| 6.95_350.2147       | 0.00 | 0.02 | 1.00 | 1.00 |
| 12.59_361.1697      | 0.00 | 0.15 | 1.00 | 0.92 |
| 6.51_360.2165       | 0.00 | 0.00 | 0.52 | 1.00 |

## D. Mass Spectral Data for Selected Features

|                |      |      |      |      |
|----------------|------|------|------|------|
| 7.52_368.2211  | 0.00 | 0.00 | 0.58 | 1.00 |
| 9.80_367.0822  | 0.00 | 0.00 | 0.51 | 1.00 |
| 14.32_379.2817 | 0.00 | 0.00 | 1.00 | 0.80 |
| 7.43_374.2181  | 0.00 | 0.00 | 0.76 | 1.00 |
| 6.24_384.2171  | 0.00 | 0.00 | 0.66 | 1.00 |
| 13.61_399.3201 | 0.00 | 0.00 | 1.00 | 0.94 |
| 1.49_394.1142  | 0.00 | 0.00 | 0.48 | 1.00 |
| 14.57_393.2988 | 0.00 | 0.00 | 1.00 | 0.89 |
| 14.04_420.3477 | 0.00 | 0.07 | 0.68 | 1.00 |
| 8.04_432.2606  | 0.00 | 0.00 | 1.00 | 0.83 |
| 9.03_457.1145  | 0.00 | 0.15 | 0.53 | 1.00 |
| 11.52_456.3791 | 0.00 | 0.00 | 0.46 | 1.00 |
| 6.21_455.1906  | 0.00 | 0.17 | 0.88 | 1.00 |
| 11.66_454.2954 | 0.00 | 0.23 | 1.00 | 0.89 |
| 9.81_454.0847  | 0.00 | 0.00 | 0.43 | 1.00 |
| 9.79_462.0710  | 0.00 | 0.00 | 0.51 | 1.00 |
| 9.78_481.0499  | 0.00 | 0.00 | 0.49 | 1.00 |
| 7.51_499.2782  | 0.00 | 0.06 | 0.86 | 1.00 |
| 4.37_494.2617  | 0.00 | 0.00 | 0.75 | 1.00 |
| 8.58_490.2972  | 0.00 | 0.00 | 0.67 | 1.00 |
| 12.00_515.2832 | 0.00 | 0.00 | 0.84 | 1.00 |
| 1.76_515.1445  | 0.00 | 0.00 | 0.63 | 1.00 |
| 9.11_548.3433  | 0.00 | 0.06 | 0.65 | 1.00 |
| 12.03_565.3746 | 0.00 | 0.00 | 0.77 | 1.00 |
| 6.90_555.3068  | 0.00 | 0.00 | 0.91 | 1.00 |
| 12.03_549.4012 | 0.00 | 0.00 | 0.74 | 1.00 |
| 9.02_549.3610  | 0.00 | 0.02 | 1.00 | 0.81 |
| 5.52_601.2501  | 0.00 | 0.00 | 0.82 | 1.00 |
| 7.20_920.0962  | 0.00 | 0.00 | 1.00 | 0.74 |
| 7.21_916.0943  | 0.00 | 0.00 | 1.00 | 0.92 |
| 7.01_1221.4414 | 0.00 | 0.00 | 1.00 | 0.93 |
| 8.34_150.0928  | 0.00 | 0.06 | 0.69 | 1.00 |
| 14.64_361.2361 | 0.01 | 0.00 | 1.00 | 0.90 |
| 7.48_177.0877  | 0.01 | 0.00 | 0.82 | 1.00 |
| 6.95_368.2220  | 0.01 | 0.02 | 0.86 | 1.00 |
| 8.10_301.1534  | 0.01 | 0.05 | 0.53 | 1.00 |
| 8.54_447.2904  | 0.02 | 0.13 | 0.57 | 1.00 |
| 3.22_235.1201  | 0.02 | 0.00 | 0.84 | 1.00 |
| 12.02_205.1953 | 0.02 | 0.00 | 0.72 | 1.00 |
| 10.18_621.4210 | 0.02 | 0.00 | 0.53 | 1.00 |
| 1.29_203.9309  | 0.02 | 0.00 | 0.65 | 1.00 |
| 13.79_365.2675 | 0.02 | 0.02 | 1.00 | 0.93 |
| 14.31_335.2563 | 0.03 | 0.00 | 1.00 | 0.60 |
| 11.43_466.2973 | 0.03 | 0.08 | 0.95 | 1.00 |
| 6.92_332.1986  | 0.03 | 0.01 | 1.00 | 0.97 |
| 6.24_515.2753  | 0.03 | 0.01 | 1.00 | 0.83 |
| 1.75_507.1572  | 0.04 | 0.00 | 0.92 | 1.00 |
| 9.11_505.3321  | 0.05 | 0.00 | 0.63 | 1.00 |
| 8.52_491.3179  | 0.06 | 0.00 | 0.63 | 1.00 |
| 1.74_150.0789  | 0.06 | 0.00 | 0.64 | 1.00 |
| 3.07_230.1126  | 0.06 | 0.15 | 0.84 | 1.00 |
| 13.79_531.4249 | 0.06 | 0.19 | 0.69 | 1.00 |
| 9.78_465.0808  | 0.06 | 0.18 | 0.55 | 1.00 |
| 1.73_338.0231  | 0.06 | 0.00 | 1.00 | 0.95 |
| 8.53_177.0880  | 0.07 | 0.06 | 0.73 | 1.00 |
| 10.52_673.3745 | 0.07 | 0.11 | 0.49 | 1.00 |
| 12.39_279.1366 | 0.07 | 0.19 | 0.99 | 1.00 |
| 3.86_150.0940  | 0.08 | 0.14 | 0.60 | 1.00 |
| 8.53_283.1523  | 0.08 | 0.17 | 1.00 | 0.96 |
| 8.53_207.1002  | 0.08 | 0.10 | 0.84 | 1.00 |
| 5.97_286.6247  | 0.09 | 0.01 | 0.94 | 1.00 |
| 7.95_433.2783  | 0.09 | 0.24 | 0.65 | 1.00 |
| 11.73_360.1653 | 0.10 | 0.23 | 0.78 | 1.00 |
| 6.95_218.1203  | 0.10 | 0.21 | 0.61 | 1.00 |
| 14.78_323.2583 | 0.11 | 0.21 | 1.00 | 0.83 |
| 11.33_299.2599 | 0.11 | 0.08 | 0.97 | 1.00 |
| 5.43_377.1482  | 0.11 | 0.00 | 0.63 | 1.00 |
| 12.40_251.2372 | 0.11 | 0.00 | 0.94 | 1.00 |
| 11.73_352.1729 | 0.11 | 0.48 | 1.00 | 1.00 |
| 11.97_299.2600 | 0.11 | 0.14 | 0.67 | 1.00 |

## D. Mass Spectral Data for Selected Features

|                |      |      |      |      |
|----------------|------|------|------|------|
| 13.53_339.2529 | 0.12 | 0.21 | 1.00 | 0.85 |
| 1.82_228.1004  | 0.13 | 0.01 | 0.57 | 1.00 |
| 7.42_280.1237  | 0.13 | 0.36 | 0.64 | 1.00 |
| 7.89_192.1015  | 0.13 | 0.23 | 0.88 | 1.00 |
| 5.97_278.6345  | 0.14 | 0.03 | 1.00 | 0.88 |
| 6.41_165.0905  | 0.15 | 0.10 | 0.89 | 1.00 |
| 14.31_325.2414 | 0.16 | 0.12 | 1.00 | 0.87 |
| 7.91_389.2523  | 0.17 | 0.08 | 0.64 | 1.00 |
| 14.04_295.2283 | 0.17 | 0.32 | 1.00 | 0.95 |
| 4.87_329.1844  | 0.18 | 0.00 | 0.68 | 1.00 |
| 12.39_401.2333 | 0.19 | 0.47 | 1.00 | 0.96 |
| 12.62_313.2746 | 0.19 | 0.16 | 0.89 | 1.00 |
| 4.31_265.0552  | 0.20 | 0.00 | 0.73 | 1.00 |
| 7.06_203.1787  | 0.21 | 0.38 | 0.66 | 1.00 |
| 12.62_273.1378 | 0.21 | 0.32 | 0.83 | 1.00 |
| 6.06_203.1781  | 0.22 | 0.39 | 0.71 | 1.00 |
| 6.87_807.0837  | 0.22 | 0.13 | 1.00 | 0.80 |
| 9.69_220.1127  | 0.23 | 0.26 | 0.73 | 1.00 |
| 4.30_310.1305  | 0.23 | 0.05 | 0.75 | 1.00 |
| 4.75_136.0625  | 0.24 | 0.00 | 1.00 | 0.85 |
| 1.73_288.1454  | 0.24 | 0.00 | 0.71 | 1.00 |
| 3.82_230.1126  | 0.25 | 0.15 | 0.71 | 1.00 |
| 3.83_198.1623  | 0.25 | 0.18 | 0.77 | 1.00 |
| 14.41_309.2409 | 0.26 | 0.46 | 1.00 | 0.94 |
| 3.85_276.1433  | 0.28 | 0.16 | 0.76 | 1.00 |
| 5.96_534.2942  | 0.32 | 0.07 | 1.00 | 0.95 |
| 16.18_335.9929 | 0.33 | 0.00 | 0.68 | 1.00 |
| 4.88_188.0708  | 0.34 | 0.58 | 0.80 | 1.00 |
| 5.61_343.2002  | 0.35 | 0.08 | 0.67 | 1.00 |
| 13.84_397.2963 | 0.38 | 0.00 | 1.00 | 0.82 |
| 12.70_699.4109 | 0.39 | 0.43 | 0.78 | 1.00 |
| 12.62_787.4580 | 0.39 | 0.66 | 0.91 | 1.00 |
| 14.79_310.3109 | 0.41 | 0.46 | 1.00 | 0.78 |
| 12.78_611.3565 | 0.43 | 0.47 | 0.73 | 1.00 |
| 3.80_194.0821  | 0.43 | 0.00 | 0.97 | 1.00 |
| 12.86_523.3040 | 0.43 | 0.29 | 0.94 | 1.00 |
| 12.63_394.2284 | 0.47 | 0.36 | 1.00 | 0.93 |
| 12.67_743.4367 | 0.48 | 0.54 | 0.81 | 1.00 |
| 12.73_655.3845 | 0.48 | 0.58 | 0.85 | 1.00 |
| 13.50_409.7445 | 0.48 | 0.60 | 0.84 | 1.00 |
| 12.74_639.4067 | 0.48 | 0.58 | 0.77 | 1.00 |
| 15.06_413.2647 | 0.49 | 0.60 | 1.00 | 0.85 |
| 12.61_771.4862 | 0.49 | 0.62 | 0.80 | 1.00 |
| 6.15_485.2027  | 0.50 | 0.53 | 0.75 | 1.00 |
| 12.86_463.2998 | 0.50 | 0.66 | 1.00 | 0.99 |
| 10.60_346.3091 | 0.51 | 1.00 | 0.00 | 0.00 |
| 9.48_225.1993  | 0.53 | 1.00 | 0.02 | 0.02 |
| 5.18_364.0987  | 0.54 | 1.00 | 0.07 | 0.07 |
| 12.78_590.4295 | 0.55 | 0.56 | 0.90 | 1.00 |
| 4.26_669.2631  | 0.56 | 1.00 | 0.00 | 0.00 |
| 11.80_235.1712 | 0.56 | 1.00 | 0.00 | 0.05 |
| 3.80_119.0369  | 0.56 | 1.00 | 0.11 | 0.00 |
| 12.83_546.4021 | 0.58 | 0.67 | 0.85 | 1.00 |
| 1.28_188.9112  | 0.59 | 1.00 | 0.24 | 0.00 |
| 4.37_663.2850  | 0.59 | 1.00 | 0.01 | 0.00 |
| 13.92_641.5490 | 0.61 | 0.52 | 1.00 | 0.83 |
| 12.70_678.4764 | 0.61 | 0.35 | 0.93 | 1.00 |
| 6.90_166.0720  | 0.61 | 1.00 | 0.00 | 0.00 |
| 4.64_412.2067  | 0.62 | 1.00 | 0.00 | 0.11 |
| 5.19_249.1604  | 0.63 | 1.00 | 0.20 | 0.27 |
| 6.19_181.1351  | 0.63 | 1.00 | 0.03 | 0.00 |
| 6.39_336.2172  | 0.66 | 0.54 | 1.00 | 0.89 |
| 4.27_647.2871  | 0.67 | 1.00 | 0.00 | 0.00 |
| 11.44_223.2060 | 0.67 | 1.00 | 0.00 | 0.00 |
| 8.08_219.1411  | 0.68 | 1.00 | 0.00 | 0.10 |
| 1.28_172.9358  | 0.69 | 1.00 | 0.28 | 0.39 |
| 7.62_970.6124  | 0.70 | 1.00 | 0.10 | 0.00 |
| 4.81_506.2950  | 0.71 | 1.00 | 0.29 | 0.33 |
| 4.37_150.0945  | 0.72 | 1.00 | 0.00 | 0.00 |
| 3.89_518.1743  | 0.73 | 1.00 | 0.00 | 0.02 |

### D. Mass Spectral Data for Selected Features

|                |      |      |      |      |
|----------------|------|------|------|------|
| 11.18_473.3585 | 0.75 | 1.00 | 0.29 | 0.35 |
| 12.89_441.3208 | 0.75 | 0.76 | 0.92 | 1.00 |
| 12.74_443.3505 | 0.77 | 1.00 | 0.00 | 0.03 |
| 4.28_227.1066  | 0.80 | 1.00 | 0.35 | 0.50 |
| 4.55_279.1361  | 0.81 | 1.00 | 0.47 | 0.53 |
| 11.28_440.3462 | 0.82 | 1.00 | 0.55 | 0.36 |
| 12.98_282.2118 | 0.82 | 1.00 | 0.21 | 0.15 |
| 4.27_302.2070  | 0.86 | 1.00 | 0.70 | 0.59 |
| 5.16_237.1592  | 0.87 | 1.00 | 0.36 | 0.32 |
| 9.26_219.1735  | 0.88 | 1.00 | 0.00 | 0.00 |
| 4.50_359.1197  | 0.89 | 1.00 | 0.00 | 0.00 |
| 10.84_227.1557 | 0.90 | 1.00 | 0.15 | 0.00 |
| 13.49_295.2258 | 0.91 | 1.00 | 0.22 | 0.18 |
| 1.47_508.0657  | 0.91 | 1.00 | 0.40 | 0.00 |
| 1.50_260.0296  | 0.92 | 1.00 | 0.05 | 0.14 |
| 1.47_748.1127  | 0.94 | 1.00 | 0.61 | 0.76 |
| 4.58_336.1924  | 0.95 | 1.00 | 0.76 | 0.57 |
| 1.48_481.1031  | 0.96 | 1.00 | 0.62 | 0.69 |
| 4.29_244.1199  | 0.97 | 1.00 | 0.28 | 0.00 |
| 4.49_225.1597  | 0.97 | 1.00 | 0.12 | 0.18 |
| 1.50_710.1736  | 0.99 | 1.00 | 0.73 | 0.82 |
| 13.95_270.2746 | 1.00 | 1.00 | 0.34 | 0.39 |
| 4.44_178.1088  | 1.00 | 0.86 | 0.33 | 0.50 |
| 3.80_288.1929  | 1.00 | 0.87 | 0.00 | 0.00 |
| 11.44_291.1951 | 1.00 | 0.75 | 0.00 | 0.00 |
| 4.25_343.1235  | 1.00 | 0.70 | 0.08 | 0.00 |
| 15.49_338.3442 | 1.00 | 0.86 | 0.00 | 0.00 |
| 4.26_356.1796  | 1.00 | 0.84 | 0.42 | 0.58 |
| 4.42_351.1212  | 1.00 | 0.79 | 0.18 | 0.20 |
| 4.39_362.1069  | 1.00 | 0.88 | 0.18 | 0.00 |
| 1.55_385.5441  | 1.00 | 0.65 | 0.12 | 0.00 |
| 13.95_411.3586 | 1.00 | 0.78 | 0.60 | 0.53 |
| 10.98_442.3651 | 1.00 | 0.78 | 0.12 | 0.33 |
| 4.37_685.2548  | 1.00 | 0.86 | 0.00 | 0.00 |
| 7.66_916.7249  | 1.00 | 0.76 | 0.00 | 0.00 |
| 7.00_916.3325  | 1.00 | 0.59 | 0.07 | 0.17 |
| 7.00_913.0933  | 1.00 | 0.71 | 0.00 | 0.10 |

## D. Mass Spectral Data for Selected Features

**Table S16.** Normalized heat map of features described as unique in figure 2b and c when comparing wild type *Nocardiosis sp. FU40 ΔApoS8* to the S2 streptomycin resistant mutant extract using OPLS-DA and extracting features from the generated S-plot with correlation coefficients  $\geq 0.9$ . Features are normalized to maximum intensity for that feature.

| Feature ID (RT_m/z) | WT   | WT   | S2   | S2   |
|---------------------|------|------|------|------|
| 12.03_135.1163      | 0.00 | 0.07 | 1.00 | 0.69 |
| 12.03_123.1165      | 0.00 | 0.00 | 1.00 | 0.72 |
| 1.50_103.5345       | 0.00 | 0.00 | 1.00 | 0.81 |
| 12.03_149.1327      | 0.00 | 0.00 | 1.00 | 0.70 |
| 13.61_149.0907      | 0.00 | 0.00 | 0.76 | 1.00 |
| 1.50_165.0624       | 0.00 | 0.00 | 1.00 | 0.85 |
| 6.56_162.0938       | 0.00 | 0.00 | 0.58 | 1.00 |
| 2.01_158.0950       | 0.00 | 0.30 | 1.00 | 0.88 |
| 5.78_170.1204       | 0.00 | 0.00 | 1.00 | 0.91 |
| 4.29_169.0959       | 0.00 | 0.00 | 0.66 | 1.00 |
| 6.60_180.1017       | 0.00 | 0.02 | 0.99 | 1.00 |
| 5.02_180.1014       | 0.00 | 0.00 | 0.91 | 1.00 |
| 10.70_179.1435      | 0.00 | 0.00 | 1.00 | 0.66 |
| 4.95_177.1399       | 0.00 | 0.28 | 1.00 | 0.96 |
| 4.39_192.1130       | 0.00 | 0.30 | 1.00 | 0.94 |
| 9.12_191.0134       | 0.00 | 0.00 | 1.00 | 0.84 |
| 4.02_198.1143       | 0.00 | 0.00 | 0.95 | 1.00 |
| 4.99_198.1134       | 0.00 | 0.00 | 0.76 | 1.00 |
| 9.08_196.0187       | 0.00 | 0.00 | 0.55 | 1.00 |
| 8.84_203.1804       | 0.00 | 0.00 | 1.00 | 0.82 |
| 8.12_203.1781       | 0.00 | 0.00 | 1.00 | 0.78 |
| 9.08_203.0278       | 0.00 | 0.00 | 1.00 | 0.72 |
| 9.80_203.0277       | 0.00 | 0.00 | 1.00 | 0.86 |
| 4.35_209.0956       | 0.00 | 0.00 | 1.00 | 0.91 |
| 5.44_208.0539       | 0.00 | 0.00 | 1.00 | 0.80 |
| 7.49_207.0994       | 0.00 | 0.12 | 1.00 | 0.85 |
| 1.30_205.9283       | 0.00 | 0.00 | 1.00 | 0.96 |
| 4.84_205.1323       | 0.00 | 0.00 | 1.00 | 0.98 |
| 1.32_211.8786       | 0.00 | 0.00 | 1.00 | 0.91 |
| 1.49_211.0584       | 0.00 | 0.24 | 1.00 | 0.85 |
| 9.81_210.0363       | 0.00 | 0.00 | 1.00 | 0.77 |
| 9.41_219.0312       | 0.00 | 0.00 | 1.00 | 0.70 |
| 9.03_217.0413       | 0.00 | 0.00 | 1.00 | 0.90 |
| 1.85_216.1242       | 0.00 | 0.05 | 0.98 | 1.00 |
| 16.16_223.9875      | 0.00 | 0.00 | 0.63 | 1.00 |
| 10.24_222.1533      | 0.00 | 0.08 | 1.00 | 0.70 |
| 9.81_222.1504       | 0.00 | 0.05 | 1.00 | 0.80 |
| 8.84_221.1903       | 0.00 | 0.00 | 1.00 | 0.79 |
| 9.04_225.0298       | 0.00 | 0.04 | 1.00 | 0.86 |
| 9.77_224.0325       | 0.00 | 0.00 | 1.00 | 0.80 |
| 5.48_229.0656       | 0.00 | 0.00 | 1.00 | 0.94 |
| 9.19_230.0719       | 0.00 | 0.00 | 1.00 | 0.98 |
| 9.82_230.0718       | 0.00 | 0.05 | 0.84 | 1.00 |
| 8.41_230.0715       | 0.00 | 0.00 | 1.00 | 0.63 |
| 10.62_236.1643      | 0.00 | 0.00 | 0.93 | 1.00 |
| 5.11_236.1306       | 0.00 | 0.13 | 0.79 | 1.00 |
| 8.54_235.1344       | 0.00 | 0.00 | 1.00 | 0.69 |
| 9.80_241.0261       | 0.00 | 0.00 | 1.00 | 0.91 |
| 10.69_238.1826      | 0.00 | 0.00 | 1.00 | 0.65 |
| 4.13_237.1268       | 0.00 | 0.31 | 1.00 | 0.81 |
| 5.81_248.1281       | 0.00 | 0.27 | 1.00 | 0.85 |
| 9.03_248.0351       | 0.00 | 0.00 | 0.80 | 1.00 |
| 8.44_247.1345       | 0.00 | 0.00 | 1.00 | 0.95 |
| 4.04_247.1287       | 0.00 | 0.00 | 0.74 | 1.00 |
| 9.07_246.5440       | 0.00 | 0.00 | 1.00 | 0.75 |
| 5.04_244.1219       | 0.00 | 0.00 | 1.00 | 0.94 |
| 4.31_249.0807       | 0.00 | 0.00 | 1.00 | 0.87 |
| 8.08_252.0397       | 0.00 | 0.00 | 0.91 | 1.00 |
| 9.63_252.0395       | 0.00 | 0.00 | 0.88 | 1.00 |
| 8.66_252.0394       | 0.00 | 0.00 | 1.00 | 0.55 |
| 5.12_252.0389       | 0.00 | 0.00 | 0.55 | 1.00 |
| 7.48_252.0388       | 0.00 | 0.00 | 0.79 | 1.00 |



## D. Mass Spectral Data for Selected Features

|                |      |      |      |      |
|----------------|------|------|------|------|
| 6.23_258.1449  | 0.00 | 0.00 | 1.00 | 0.69 |
| 3.87_257.1146  | 0.00 | 0.30 | 1.00 | 0.95 |
| 9.81_253.5524  | 0.00 | 0.03 | 1.00 | 0.97 |
| 12.02_263.1978 | 0.00 | 0.08 | 1.00 | 0.84 |
| 1.78_262.1278  | 0.00 | 0.00 | 0.96 | 1.00 |
| 5.86_262.1048  | 0.00 | 0.27 | 0.97 | 1.00 |
| 5.01_261.1438  | 0.00 | 0.06 | 0.77 | 1.00 |
| 9.03_260.5527  | 0.00 | 0.00 | 0.94 | 1.00 |
| 10.52_268.0194 | 0.00 | 0.21 | 0.89 | 1.00 |
| 5.43_268.0192  | 0.00 | 0.06 | 0.96 | 1.00 |
| 6.28_268.0191  | 0.00 | 0.10 | 1.00 | 0.96 |
| 8.32_268.0180  | 0.00 | 0.00 | 1.00 | 0.55 |
| 5.18_266.1406  | 0.00 | 0.27 | 1.00 | 0.91 |
| 5.27_264.2082  | 0.00 | 0.00 | 1.00 | 0.88 |
| 7.49_268.0200  | 0.00 | 0.00 | 0.51 | 1.00 |
| 4.60_268.0196  | 0.00 | 0.00 | 1.00 | 0.82 |
| 11.39_268.0195 | 0.00 | 0.00 | 0.93 | 1.00 |
| 5.84_281.1328  | 0.00 | 0.00 | 0.91 | 1.00 |
| 9.12_279.1585  | 0.00 | 0.00 | 1.00 | 0.67 |
| 7.18_278.2110  | 0.00 | 0.00 | 1.00 | 0.80 |
| 6.07_276.1943  | 0.00 | 0.00 | 1.00 | 0.97 |
| 4.52_276.1726  | 0.00 | 0.00 | 0.97 | 1.00 |
| 5.71_286.2118  | 0.00 | 0.00 | 1.00 | 0.70 |
| 7.19_284.2219  | 0.00 | 0.00 | 1.00 | 0.68 |
| 7.50_283.1523  | 0.00 | 0.05 | 1.00 | 0.74 |
| 1.73_282.0649  | 0.00 | 0.02 | 1.00 | 0.87 |
| 7.72_281.1420  | 0.00 | 0.00 | 1.00 | 0.80 |
| 5.22_295.1312  | 0.00 | 0.04 | 1.00 | 0.81 |
| 7.82_294.2085  | 0.00 | 0.00 | 1.00 | 0.84 |
| 6.82_294.2084  | 0.00 | 0.00 | 1.00 | 0.56 |
| 3.86_294.1559  | 0.00 | 0.40 | 1.00 | 0.86 |
| 7.15_293.2251  | 0.00 | 0.00 | 1.00 | 0.67 |
| 4.87_293.1612  | 0.00 | 0.22 | 0.87 | 1.00 |
| 6.49_292.1923  | 0.00 | 0.03 | 0.65 | 1.00 |
| 3.76_299.1387  | 0.00 | 0.00 | 1.00 | 0.71 |
| 7.73_298.2024  | 0.00 | 0.00 | 1.00 | 0.87 |
| 4.74_298.0969  | 0.00 | 0.06 | 1.00 | 0.84 |
| 9.60_297.1694  | 0.00 | 0.00 | 1.00 | 0.64 |
| 7.19_296.2224  | 0.00 | 0.00 | 1.00 | 0.89 |
| 5.83_303.1558  | 0.00 | 0.01 | 0.95 | 1.00 |
| 3.78_300.1386  | 0.00 | 0.04 | 1.00 | 0.81 |
| 12.02_309.1921 | 0.00 | 0.02 | 1.00 | 0.90 |
| 6.00_308.2238  | 0.00 | 0.00 | 1.00 | 0.92 |
| 6.06_312.2197  | 0.00 | 0.00 | 0.99 | 1.00 |
| 6.84_312.2197  | 0.00 | 0.00 | 1.00 | 0.78 |
| 7.24_312.2197  | 0.00 | 0.00 | 1.00 | 0.70 |
| 10.59_311.1859 | 0.00 | 0.00 | 1.00 | 0.67 |
| 7.47_310.2026  | 0.00 | 0.00 | 0.97 | 1.00 |
| 5.82_322.1007  | 0.00 | 0.00 | 1.00 | 0.89 |
| 1.74_322.0446  | 0.00 | 0.02 | 1.00 | 0.91 |
| 14.63_321.2420 | 0.00 | 0.00 | 0.64 | 1.00 |
| 9.13_319.1539  | 0.00 | 0.00 | 1.00 | 0.71 |
| 6.92_318.2094  | 0.00 | 0.00 | 0.94 | 1.00 |
| 6.00_328.7423  | 0.00 | 0.24 | 1.00 | 0.83 |
| 7.34_326.2353  | 0.00 | 0.00 | 1.00 | 0.84 |
| 12.03_325.1706 | 0.00 | 0.00 | 1.00 | 0.92 |
| 6.08_324.1828  | 0.00 | 0.30 | 1.00 | 0.84 |
| 6.31_335.7452  | 0.00 | 0.00 | 1.00 | 0.82 |
| 6.62_334.2005  | 0.00 | 0.00 | 0.51 | 1.00 |
| 8.76_329.1942  | 0.00 | 0.10 | 1.00 | 0.76 |
| 5.84_341.1007  | 0.00 | 0.00 | 1.00 | 0.86 |
| 14.63_339.2533 | 0.00 | 0.00 | 1.00 | 0.89 |
| 7.48_345.1875  | 0.00 | 0.00 | 1.00 | 0.78 |
| 5.26_354.0787  | 0.00 | 0.16 | 0.98 | 1.00 |
| 8.24_352.2057  | 0.00 | 0.00 | 1.00 | 0.96 |
| 4.01_351.5992  | 0.00 | 0.00 | 1.00 | 0.87 |
| 6.95_350.2147  | 0.00 | 0.10 | 1.00 | 0.72 |
| 6.51_360.2165  | 0.00 | 0.00 | 1.00 | 0.82 |
| 8.53_359.2035  | 0.00 | 0.09 | 1.00 | 0.74 |
| 7.52_368.2211  | 0.00 | 0.00 | 0.92 | 1.00 |



## D. Mass Spectral Data for Selected Features

|                |      |      |      |      |
|----------------|------|------|------|------|
| 9.80_367.0822  | 0.00 | 0.00 | 1.00 | 0.84 |
| 10.08_366.2455 | 0.00 | 0.00 | 1.00 | 0.73 |
| 6.22_366.2068  | 0.00 | 0.15 | 1.00 | 0.92 |
| 5.64_366.2063  | 0.00 | 0.00 | 0.75 | 1.00 |
| 7.83_387.1861  | 0.00 | 0.00 | 1.00 | 0.96 |
| 9.80_387.0731  | 0.00 | 0.00 | 1.00 | 0.77 |
| 6.88_386.2329  | 0.00 | 0.03 | 0.95 | 1.00 |
| 6.24_384.2171  | 0.00 | 0.00 | 1.00 | 0.96 |
| 8.63_398.2317  | 0.00 | 0.00 | 1.00 | 0.69 |
| 9.08_429.0845  | 0.00 | 0.00 | 1.00 | 0.75 |
| 7.98_431.2698  | 0.00 | 0.05 | 1.00 | 0.80 |
| 9.07_451.0615  | 0.00 | 0.00 | 1.00 | 0.78 |
| 6.99_443.3240  | 0.00 | 0.06 | 1.00 | 0.92 |
| 9.73_443.1014  | 0.00 | 0.00 | 1.00 | 0.83 |
| 6.90_461.2902  | 0.00 | 0.00 | 0.88 | 1.00 |
| 5.90_459.3212  | 0.00 | 0.14 | 1.00 | 0.88 |
| 10.02_459.0960 | 0.00 | 0.00 | 1.00 | 0.67 |
| 9.03_457.1145  | 0.00 | 0.01 | 1.00 | 0.77 |
| 11.52_456.3791 | 0.00 | 0.00 | 1.00 | 0.64 |
| 6.21_455.1906  | 0.00 | 0.15 | 1.00 | 0.82 |
| 9.81_454.0847  | 0.00 | 0.00 | 1.00 | 0.73 |
| 9.79_462.0710  | 0.00 | 0.00 | 1.00 | 0.67 |
| 9.78_481.0499  | 0.00 | 0.00 | 1.00 | 0.79 |
| 9.02_479.0963  | 0.00 | 0.00 | 1.00 | 0.87 |
| 4.15_476.2404  | 0.00 | 0.00 | 1.00 | 0.74 |
| 6.98_499.2793  | 0.00 | 0.00 | 1.00 | 0.75 |
| 7.51_499.2782  | 0.00 | 0.04 | 1.00 | 0.91 |
| 9.02_495.0687  | 0.00 | 0.00 | 1.00 | 0.78 |
| 5.37_493.1709  | 0.00 | 0.00 | 1.00 | 0.85 |
| 9.09_512.3013  | 0.00 | 0.00 | 1.00 | 0.78 |
| 13.62_510.2556 | 0.00 | 0.28 | 1.00 | 0.73 |
| 5.65_504.2609  | 0.00 | 0.00 | 1.00 | 0.98 |
| 5.64_515.2738  | 0.00 | 0.01 | 1.00 | 0.74 |
| 6.62_515.2737  | 0.00 | 0.00 | 0.86 | 1.00 |
| 1.76_515.1445  | 0.00 | 0.00 | 0.92 | 1.00 |
| 10.06_526.3139 | 0.00 | 0.00 | 1.00 | 0.65 |
| 7.21_526.2839  | 0.00 | 0.03 | 0.97 | 1.00 |
| 6.79_549.3505  | 0.00 | 0.00 | 1.00 | 0.60 |
| 7.20_544.2918  | 0.00 | 0.00 | 1.00 | 0.85 |
| 7.57_542.3960  | 0.00 | 0.20 | 1.00 | 0.78 |
| 12.03_565.3746 | 0.00 | 0.02 | 1.00 | 0.85 |
| 7.14_560.1805  | 0.00 | 0.00 | 0.76 | 1.00 |
| 6.90_555.3068  | 0.00 | 0.00 | 1.00 | 0.82 |
| 1.72_551.1035  | 0.00 | 0.00 | 1.00 | 0.87 |
| 12.03_549.4012 | 0.00 | 0.00 | 1.00 | 0.84 |
| 5.52_601.2501  | 0.00 | 0.00 | 0.60 | 1.00 |
| 1.25_639.8836  | 0.00 | 0.00 | 1.00 | 0.61 |
| 6.02_637.3187  | 0.00 | 0.00 | 1.00 | 0.84 |
| 9.79_683.1204  | 0.00 | 0.00 | 1.00 | 0.51 |
| 7.60_846.3434  | 0.00 | 0.00 | 1.00 | 0.91 |
| 7.20_920.0962  | 0.00 | 0.00 | 0.89 | 1.00 |
| 7.21_916.0943  | 0.00 | 0.00 | 0.86 | 1.00 |
| 9.80_907.1678  | 0.00 | 0.00 | 1.00 | 0.79 |
| 7.67_1031.2480 | 0.00 | 0.22 | 1.00 | 0.77 |
| 7.69_1031.1674 | 0.00 | 0.27 | 1.00 | 0.93 |
| 7.67_1031.0798 | 0.00 | 0.00 | 1.00 | 0.59 |
| 7.63_970.6960  | 0.00 | 0.00 | 1.00 | 0.53 |
| 7.01_1221.4414 | 0.00 | 0.00 | 1.00 | 0.93 |
| 7.00_1216.1209 | 0.00 | 0.36 | 1.00 | 0.85 |
| 7.70_1064.5448 | 0.00 | 0.13 | 0.60 | 1.00 |
| 8.34_150.0928  | 0.00 | 0.03 | 1.00 | 0.86 |
| 9.79_218.0234  | 0.00 | 0.02 | 0.96 | 1.00 |
| 1.64_174.0879  | 0.00 | 0.00 | 0.59 | 1.00 |
| 9.78_465.0808  | 0.01 | 0.02 | 1.00 | 0.61 |
| 6.76_310.2021  | 0.01 | 0.00 | 0.99 | 1.00 |
| 6.24_515.2753  | 0.01 | 0.00 | 1.00 | 0.79 |
| 1.82_228.1004  | 0.01 | 0.00 | 0.89 | 1.00 |
| 1.29_203.9309  | 0.01 | 0.00 | 1.00 | 0.90 |
| 8.10_301.1534  | 0.01 | 0.04 | 1.00 | 0.77 |
| 5.66_384.2168  | 0.01 | 0.00 | 1.00 | 0.96 |

## D. Mass Spectral Data for Selected Features

|                |      |      |      |      |
|----------------|------|------|------|------|
| 1.64_246.1172  | 0.01 | 0.00 | 0.93 | 1.00 |
| 3.22_235.1201  | 0.01 | 0.00 | 0.84 | 1.00 |
| 9.81_269.0437  | 0.02 | 0.00 | 1.00 | 0.73 |
| 6.06_294.2084  | 0.02 | 0.00 | 1.00 | 0.78 |
| 7.48_177.0877  | 0.02 | 0.00 | 1.00 | 0.89 |
| 9.66_279.1583  | 0.02 | 0.00 | 1.00 | 0.69 |
| 8.74_542.3146  | 0.02 | 0.00 | 0.90 | 1.00 |
| 12.02_205.1953 | 0.02 | 0.00 | 1.00 | 0.71 |
| 9.14_239.1284  | 0.03 | 0.02 | 1.00 | 0.75 |
| 5.43_377.1482  | 0.03 | 0.00 | 1.00 | 0.74 |
| 9.67_319.1539  | 0.03 | 0.05 | 0.64 | 1.00 |
| 1.73_338.0231  | 0.04 | 0.00 | 1.00 | 0.99 |
| 7.06_325.1861  | 0.04 | 0.23 | 1.00 | 1.00 |
| 8.53_283.1523  | 0.04 | 0.09 | 0.88 | 1.00 |
| 1.74_150.0789  | 0.04 | 0.00 | 1.00 | 0.77 |
| 6.95_218.1203  | 0.05 | 0.10 | 1.00 | 0.90 |
| 6.95_368.2220  | 0.05 | 0.09 | 1.00 | 0.76 |
| 3.07_230.1126  | 0.05 | 0.12 | 0.96 | 1.00 |
| 10.52_673.3745 | 0.06 | 0.10 | 1.00 | 0.69 |
| 1.70_260.1135  | 0.06 | 0.00 | 0.91 | 1.00 |
| 7.42_280.1237  | 0.07 | 0.19 | 1.00 | 0.88 |
| 4.75_136.0625  | 0.07 | 0.00 | 0.80 | 1.00 |
| 10.98_442.3651 | 0.07 | 0.05 | 1.00 | 0.65 |
| 4.61_247.1287  | 0.07 | 0.00 | 0.81 | 1.00 |
| 3.83_198.1623  | 0.07 | 0.05 | 1.00 | 0.89 |
| 3.86_150.0940  | 0.07 | 0.13 | 1.00 | 0.90 |
| 1.76_596.1679  | 0.07 | 0.00 | 0.64 | 1.00 |
| 4.37_326.1802  | 0.07 | 0.44 | 0.97 | 1.00 |
| 8.53_207.1002  | 0.07 | 0.09 | 0.97 | 1.00 |
| 5.97_286.6247  | 0.08 | 0.01 | 0.84 | 1.00 |
| 8.53_177.0880  | 0.08 | 0.07 | 1.00 | 0.95 |
| 7.80_291.1290  | 0.08 | 0.30 | 1.00 | 0.91 |
| 14.64_361.2361 | 0.09 | 0.00 | 0.95 | 1.00 |
| 5.84_299.0939  | 0.11 | 0.05 | 0.99 | 1.00 |
| 7.25_371.1508  | 0.11 | 0.00 | 0.89 | 1.00 |
| 5.83_325.1311  | 0.12 | 0.00 | 0.92 | 1.00 |
| 9.41_281.1770  | 0.13 | 0.24 | 1.00 | 0.77 |
| 7.06_221.1900  | 0.13 | 0.40 | 1.00 | 0.79 |
| 6.41_165.0905  | 0.14 | 0.09 | 1.00 | 0.72 |
| 1.65_159.0768  | 0.16 | 0.00 | 0.75 | 1.00 |
| 9.79_1349.2480 | 0.16 | 0.00 | 0.89 | 1.00 |
| 4.87_329.1844  | 0.17 | 0.00 | 1.00 | 0.86 |
| 4.30_310.1305  | 0.17 | 0.04 | 1.00 | 0.86 |
| 3.85_276.1433  | 0.17 | 0.10 | 1.00 | 0.86 |
| 6.71_1160.7578 | 0.17 | 0.00 | 1.00 | 0.77 |
| 7.06_203.1787  | 0.17 | 0.32 | 1.00 | 0.90 |
| 6.06_203.1781  | 0.18 | 0.32 | 1.00 | 0.79 |
| 1.78_217.1296  | 0.18 | 0.37 | 0.78 | 1.00 |
| 9.47_211.0868  | 0.18 | 0.32 | 1.00 | 0.72 |
| 1.73_288.1454  | 0.20 | 0.00 | 1.00 | 0.86 |
| 4.31_265.0552  | 0.20 | 0.00 | 1.00 | 0.92 |
| 4.81_464.2611  | 0.21 | 0.25 | 1.00 | 0.82 |
| 8.29_401.1993  | 0.21 | 0.00 | 1.00 | 0.92 |
| 3.82_230.1126  | 0.22 | 0.14 | 0.93 | 1.00 |
| 4.30_478.1379  | 0.23 | 0.05 | 1.00 | 0.89 |
| 5.81_222.1598  | 0.24 | 0.46 | 1.00 | 0.85 |
| 16.18_335.9929 | 0.24 | 0.00 | 1.00 | 0.83 |
| 4.12_413.1243  | 0.25 | 0.45 | 1.00 | 0.89 |
| 7.42_196.0651  | 0.25 | 0.13 | 1.00 | 0.87 |
| 4.09_573.1785  | 0.27 | 0.46 | 1.00 | 0.90 |
| 6.39_336.2172  | 0.28 | 0.23 | 1.00 | 0.95 |
| 4.88_188.0708  | 0.29 | 0.50 | 0.99 | 1.00 |
| 12.62_416.2462 | 0.30 | 0.36 | 1.00 | 0.90 |
| 4.26_450.2439  | 0.30 | 0.01 | 1.00 | 0.92 |
| 4.86_372.1909  | 0.30 | 0.16 | 1.00 | 0.91 |
| 6.27_207.0660  | 0.32 | 0.57 | 1.00 | 1.00 |
| 4.64_137.0376  | 0.33 | 0.34 | 1.00 | 0.98 |
| 5.27_685.1761  | 0.33 | 0.00 | 1.00 | 0.89 |
| 3.80_194.0821  | 0.34 | 0.00 | 0.77 | 1.00 |
| 5.96_534.2942  | 0.35 | 0.08 | 1.00 | 0.90 |

## D. Mass Spectral Data for Selected Features

|                |      |      |      |      |
|----------------|------|------|------|------|
| 16.15_459.1339 | 0.35 | 0.00 | 0.74 | 1.00 |
| 5.81_605.2195  | 0.36 | 0.51 | 1.00 | 0.81 |
| 4.63_149.1104  | 0.38 | 0.61 | 1.00 | 0.89 |
| 6.78_176.0714  | 0.38 | 0.65 | 1.00 | 0.93 |
| 5.16_210.1137  | 0.40 | 0.39 | 1.00 | 0.83 |
| 8.22_220.1332  | 0.40 | 0.59 | 1.00 | 0.81 |
| 5.34_191.1575  | 0.44 | 0.63 | 1.00 | 0.90 |
| 4.32_308.1712  | 0.46 | 0.16 | 1.00 | 0.89 |
| 4.34_266.1408  | 0.46 | 0.36 | 0.90 | 1.00 |
| 12.43_386.2820 | 0.50 | 1.00 | 0.00 | 0.00 |
| 13.49_420.3478 | 0.51 | 1.00 | 0.03 | 0.04 |
| 10.60_346.3091 | 0.51 | 1.00 | 0.00 | 0.00 |
| 3.93_438.1964  | 0.51 | 0.19 | 1.00 | 0.89 |
| 13.00_413.3095 | 0.52 | 1.00 | 0.06 | 0.04 |
| 10.40_371.3275 | 0.52 | 1.00 | 0.00 | 0.00 |
| 6.40_263.1761  | 0.53 | 0.57 | 1.00 | 0.92 |
| 9.48_225.1993  | 0.53 | 1.00 | 0.02 | 0.01 |
| 6.81_807.1918  | 0.54 | 1.00 | 0.00 | 0.00 |
| 4.40_158.0302  | 0.54 | 0.40 | 1.00 | 0.88 |
| 13.53_339.2529 | 0.55 | 1.00 | 0.00 | 0.00 |
| 4.26_669.2631  | 0.56 | 1.00 | 0.00 | 0.00 |
| 11.80_235.1712 | 0.56 | 1.00 | 0.07 | 0.00 |
| 10.15_739.4618 | 0.56 | 1.00 | 0.01 | 0.02 |
| 14.41_309.2409 | 0.56 | 1.00 | 0.05 | 0.17 |
| 6.15_485.2027  | 0.57 | 0.61 | 1.00 | 0.81 |
| 10.53_531.4000 | 0.57 | 1.00 | 0.00 | 0.00 |
| 1.94_252.0411  | 0.57 | 0.43 | 0.95 | 1.00 |
| 12.97_407.3144 | 0.58 | 1.00 | 0.04 | 0.03 |
| 12.98_399.3242 | 0.58 | 1.00 | 0.05 | 0.03 |
| 4.37_663.2850  | 0.59 | 1.00 | 0.00 | 0.00 |
| 4.29_244.1199  | 0.61 | 0.63 | 1.00 | 0.87 |
| 13.98_433.3418 | 0.61 | 1.00 | 0.00 | 0.00 |
| 6.90_166.0720  | 0.61 | 1.00 | 0.00 | 0.00 |
| 5.20_239.1759  | 0.62 | 1.00 | 0.23 | 0.19 |
| 4.64_412.2067  | 0.62 | 1.00 | 0.13 | 0.12 |
| 3.86_242.1126  | 0.63 | 0.68 | 0.91 | 1.00 |
| 6.19_181.1351  | 0.63 | 1.00 | 0.06 | 0.06 |
| 10.97_401.2525 | 0.63 | 1.00 | 0.12 | 0.04 |
| 3.87_166.0522  | 0.65 | 0.38 | 0.96 | 1.00 |
| 6.40_439.1986  | 0.65 | 0.65 | 1.00 | 0.84 |
| 11.58_415.2745 | 0.65 | 1.00 | 0.02 | 0.00 |
| 12.62_273.1378 | 0.66 | 1.00 | 0.00 | 0.00 |
| 12.86_507.3281 | 0.66 | 1.00 | 0.29 | 0.25 |
| 12.97_290.7254 | 0.66 | 1.00 | 0.31 | 0.24 |
| 4.27_647.2871  | 0.67 | 1.00 | 0.01 | 0.01 |
| 12.82_551.3593 | 0.67 | 1.00 | 0.37 | 0.26 |
| 11.44_223.2060 | 0.67 | 1.00 | 0.00 | 0.00 |
| 5.72_240.1231  | 0.68 | 0.47 | 0.88 | 1.00 |
| 6.85_824.9348  | 0.70 | 1.00 | 0.00 | 0.00 |
| 4.81_506.2950  | 0.71 | 1.00 | 0.10 | 0.00 |
| 16.15_442.8736 | 0.71 | 1.00 | 0.00 | 0.00 |
| 4.50_359.1197  | 0.71 | 0.79 | 0.97 | 1.00 |
| 7.07_184.1710  | 0.72 | 1.00 | 0.00 | 0.00 |
| 4.37_150.0945  | 0.72 | 1.00 | 0.00 | 0.00 |
| 12.79_595.3829 | 0.73 | 1.00 | 0.43 | 0.35 |
| 3.89_518.1743  | 0.73 | 1.00 | 0.05 | 0.00 |
| 12.67_727.4605 | 0.74 | 1.00 | 0.45 | 0.40 |
| 4.81_415.2090  | 0.74 | 0.52 | 1.00 | 0.95 |
| 11.18_473.3585 | 0.75 | 1.00 | 0.00 | 0.01 |
| 3.75_245.1607  | 0.75 | 1.00 | 0.13 | 0.15 |
| 6.23_251.1781  | 0.76 | 0.84 | 1.00 | 0.94 |
| 5.43_241.1546  | 0.76 | 0.78 | 0.98 | 1.00 |
| 12.70_683.4373 | 0.77 | 1.00 | 0.52 | 0.40 |
| 12.86_463.2998 | 0.77 | 1.00 | 0.00 | 0.23 |
| 12.74_443.3505 | 0.77 | 1.00 | 0.01 | 0.02 |
| 6.34_150.0787  | 0.77 | 0.73 | 0.91 | 1.00 |
| 12.97_547.4060 | 0.77 | 1.00 | 0.10 | 0.13 |
| 13.86_425.2896 | 0.78 | 1.00 | 0.32 | 0.26 |
| 5.26_147.0936  | 0.79 | 1.00 | 0.38 | 0.32 |
| 11.97_299.2600 | 0.80 | 1.00 | 0.00 | 0.00 |

### D. Mass Spectral Data for Selected Features

|                |      |      |      |      |
|----------------|------|------|------|------|
| 13.50_524.2740 | 0.81 | 1.00 | 0.54 | 0.42 |
| 15.06_413.2647 | 0.81 | 1.00 | 0.09 | 0.34 |
| 12.86_502.3745 | 0.82 | 1.00 | 0.52 | 0.35 |
| 11.84_443.3878 | 0.82 | 1.00 | 0.21 | 0.13 |
| 11.03_354.1608 | 0.82 | 1.00 | 0.10 | 0.10 |
| 11.28_440.3462 | 0.82 | 1.00 | 0.00 | 0.00 |
| 12.98_282.2118 | 0.82 | 1.00 | 0.00 | 0.04 |
| 12.73_655.3845 | 0.83 | 1.00 | 0.22 | 0.42 |
| 12.74_639.4067 | 0.83 | 1.00 | 0.46 | 0.40 |
| 13.79_365.2675 | 0.84 | 1.00 | 0.00 | 0.00 |
| 12.80_567.3292 | 0.85 | 1.00 | 0.00 | 0.37 |
| 12.83_546.4021 | 0.86 | 1.00 | 0.46 | 0.30 |
| 10.38_401.3397 | 0.88 | 1.00 | 0.29 | 0.21 |
| 9.26_219.1735  | 0.88 | 1.00 | 0.00 | 0.00 |
| 12.67_743.4367 | 0.88 | 1.00 | 0.59 | 0.51 |
| 12.70_699.4109 | 0.89 | 1.00 | 0.34 | 0.24 |
| 14.79_310.3109 | 0.90 | 1.00 | 0.67 | 0.66 |
| 12.78_611.3565 | 0.91 | 1.00 | 0.19 | 0.49 |
| 15.94_338.3442 | 0.91 | 1.00 | 0.59 | 0.48 |
| 13.49_295.2258 | 0.91 | 1.00 | 0.01 | 0.00 |
| 1.47_508.0657  | 0.91 | 1.00 | 0.44 | 0.17 |
| 12.73_320.2010 | 0.94 | 1.00 | 0.13 | 0.00 |
| 4.49_225.1597  | 0.97 | 1.00 | 0.36 | 0.32 |
| 12.89_441.3208 | 0.99 | 1.00 | 0.38 | 0.19 |
| 12.78_590.4295 | 1.00 | 1.00 | 0.58 | 0.46 |
| 10.36_211.6353 | 1.00 | 0.89 | 0.31 | 0.00 |
| 3.82_209.1275  | 1.00 | 0.90 | 0.62 | 0.56 |
| 11.31_225.6512 | 1.00 | 0.95 | 0.38 | 0.31 |
| 9.27_240.2315  | 1.00 | 0.88 | 0.10 | 0.00 |
| 10.39_268.2627 | 1.00 | 0.83 | 0.00 | 0.00 |
| 6.59_273.1670  | 1.00 | 0.84 | 0.62 | 0.67 |
| 11.44_291.1951 | 1.00 | 0.75 | 0.00 | 0.00 |
| 11.33_299.2599 | 1.00 | 0.77 | 0.00 | 0.00 |
| 12.62_313.2746 | 1.00 | 0.83 | 0.00 | 0.00 |
| 14.82_332.2940 | 1.00 | 0.65 | 0.21 | 0.23 |
| 4.25_343.1235  | 1.00 | 0.70 | 0.34 | 0.08 |
| 15.49_338.3442 | 1.00 | 0.86 | 0.00 | 0.00 |
| 15.92_360.3229 | 1.00 | 0.71 | 0.09 | 0.32 |
| 13.48_397.3392 | 1.00 | 0.75 | 0.00 | 0.00 |
| 10.78_415.3581 | 1.00 | 0.61 | 0.11 | 0.22 |
| 13.95_411.3586 | 1.00 | 0.78 | 0.01 | 0.02 |
| 13.27_419.3131 | 1.00 | 0.81 | 0.00 | 0.00 |
| 12.86_485.3471 | 1.00 | 0.86 | 0.32 | 0.24 |
| 12.81_529.3766 | 1.00 | 0.77 | 0.35 | 0.14 |
| 12.97_555.3910 | 1.00 | 0.94 | 0.00 | 0.23 |
| 12.79_573.4039 | 1.00 | 0.73 | 0.34 | 0.24 |
| 12.75_617.4294 | 1.00 | 0.84 | 0.39 | 0.25 |
| 13.92_641.5490 | 1.00 | 0.85 | 0.00 | 0.00 |
| 4.37_685.2548  | 1.00 | 0.86 | 0.00 | 0.00 |
| 12.67_705.4810 | 1.00 | 0.93 | 0.57 | 0.33 |
| 6.87_807.0837  | 1.00 | 0.57 | 0.11 | 0.00 |

## D. Mass Spectral Data for Selected Features

**Table S17.** Normalized heat map of features described as unique in figure 2b and c when comparing wild type *Nocardiosis sp. FU40 ΔApoS8* to the S3 streptomycin resistant mutant extract using OPLS-DA and extracting features from the generated S-plot with correlation coefficients  $\geq 0.9$ . Features are normalized to maximum intensity for that feature.

| Feature ID (RT_m/z) | WT   | WT   | S3   | S3   |
|---------------------|------|------|------|------|
| 12.03_135.1163      | 0.00 | 0.05 | 0.98 | 1.00 |
| 12.03_123.1165      | 0.00 | 0.00 | 0.93 | 1.00 |
| 4.87_118.0679       | 0.00 | 0.14 | 0.81 | 1.00 |
| 12.03_149.1327      | 0.00 | 0.00 | 0.98 | 1.00 |
| 6.56_162.0938       | 0.00 | 0.00 | 0.88 | 1.00 |
| 2.01_158.0950       | 0.00 | 0.27 | 1.00 | 0.67 |
| 5.78_170.1204       | 0.00 | 0.00 | 1.00 | 0.97 |
| 7.08_169.0882       | 0.00 | 0.01 | 1.00 | 0.70 |
| 2.44_166.0747       | 0.00 | 0.10 | 0.94 | 1.00 |
| 6.60_180.1017       | 0.00 | 0.02 | 1.00 | 0.98 |
| 5.02_180.1014       | 0.00 | 0.00 | 0.66 | 1.00 |
| 4.95_177.1399       | 0.00 | 0.31 | 0.92 | 1.00 |
| 4.39_192.1130       | 0.00 | 0.16 | 1.00 | 0.98 |
| 9.12_191.0134       | 0.00 | 0.00 | 0.83 | 1.00 |
| 4.14_186.1168       | 0.00 | 0.00 | 1.00 | 0.60 |
| 4.02_198.1143       | 0.00 | 0.00 | 1.00 | 0.96 |
| 4.99_198.1134       | 0.00 | 0.00 | 1.00 | 0.97 |
| 9.08_196.0187       | 0.00 | 0.00 | 1.00 | 0.97 |
| 8.84_203.1804       | 0.00 | 0.00 | 0.96 | 1.00 |
| 8.12_203.1781       | 0.00 | 0.00 | 0.97 | 1.00 |
| 9.08_203.0278       | 0.00 | 0.00 | 1.00 | 0.98 |
| 9.80_203.0277       | 0.00 | 0.00 | 0.95 | 1.00 |
| 1.42_201.0074       | 0.00 | 0.00 | 0.99 | 1.00 |
| 4.35_209.0956       | 0.00 | 0.00 | 0.86 | 1.00 |
| 4.54_208.1355       | 0.00 | 0.00 | 0.72 | 1.00 |
| 5.44_208.0539       | 0.00 | 0.00 | 1.00 | 0.76 |
| 7.49_207.0994       | 0.00 | 0.08 | 1.00 | 0.83 |
| 1.30_205.9283       | 0.00 | 0.00 | 1.00 | 0.94 |
| 4.84_205.1323       | 0.00 | 0.00 | 0.92 | 1.00 |
| 9.81_205.1237       | 0.00 | 0.00 | 1.00 | 1.00 |
| 10.22_205.1232      | 0.00 | 0.00 | 1.00 | 0.51 |
| 1.32_211.8786       | 0.00 | 0.00 | 0.80 | 1.00 |
| 1.49_211.0584       | 0.00 | 0.18 | 0.74 | 1.00 |
| 9.81_210.0363       | 0.00 | 0.00 | 0.94 | 1.00 |
| 9.07_210.0305       | 0.00 | 0.00 | 0.76 | 1.00 |
| 9.41_219.0312       | 0.00 | 0.00 | 0.99 | 1.00 |
| 3.69_218.1136       | 0.00 | 0.39 | 1.00 | 0.78 |
| 9.03_217.0413       | 0.00 | 0.00 | 1.00 | 1.00 |
| 8.84_221.1903       | 0.00 | 0.00 | 1.00 | 0.98 |
| 6.51_220.1710       | 0.00 | 0.13 | 1.00 | 0.86 |
| 5.15_226.5984       | 0.00 | 0.08 | 1.00 | 0.85 |
| 7.35_225.1140       | 0.00 | 0.00 | 1.00 | 0.73 |
| 7.99_225.1125       | 0.00 | 0.02 | 1.00 | 0.97 |
| 9.04_225.0298       | 0.00 | 0.02 | 0.93 | 1.00 |
| 9.77_224.0325       | 0.00 | 0.00 | 1.00 | 0.92 |
| 5.48_229.0656       | 0.00 | 0.00 | 0.97 | 1.00 |
| 4.02_228.1701       | 0.00 | 0.00 | 0.91 | 1.00 |
| 9.82_230.0718       | 0.00 | 0.04 | 1.00 | 0.58 |
| 8.41_230.0715       | 0.00 | 0.00 | 1.00 | 0.50 |
| 5.11_236.1306       | 0.00 | 0.16 | 0.98 | 1.00 |
| 8.54_235.1344       | 0.00 | 0.00 | 1.00 | 0.92 |
| 9.80_241.0261       | 0.00 | 0.00 | 1.00 | 0.99 |
| 8.82_241.0249       | 0.00 | 0.00 | 1.00 | 0.85 |
| 10.69_238.1826      | 0.00 | 0.00 | 1.00 | 0.74 |
| 5.81_248.1281       | 0.00 | 0.23 | 1.00 | 0.85 |
| 9.03_248.0351       | 0.00 | 0.00 | 1.00 | 0.90 |
| 4.04_247.1287       | 0.00 | 0.00 | 1.00 | 0.99 |
| 7.33_247.0943       | 0.00 | 0.18 | 0.96 | 1.00 |
| 9.07_246.5440       | 0.00 | 0.00 | 1.00 | 0.72 |
| 5.04_244.1219       | 0.00 | 0.00 | 0.84 | 1.00 |
| 4.31_249.0807       | 0.00 | 0.00 | 1.00 | 0.94 |
| 4.56_252.0394       | 0.00 | 0.11 | 1.00 | 0.57 |
| 6.01_252.0391       | 0.00 | 0.00 | 0.63 | 1.00 |
| 7.48_252.0388       | 0.00 | 0.00 | 0.92 | 1.00 |

## D. Mass Spectral Data for Selected Features

|                |      |      |      |      |
|----------------|------|------|------|------|
| 3.87_257.1146  | 0.00 | 0.33 | 0.88 | 1.00 |
| 9.81_253.5524  | 0.00 | 0.03 | 0.89 | 1.00 |
| 12.02_263.1978 | 0.00 | 0.03 | 0.87 | 1.00 |
| 1.78_262.1278  | 0.00 | 0.00 | 1.00 | 0.89 |
| 5.86_262.1048  | 0.00 | 0.27 | 1.00 | 0.82 |
| 10.71_261.1779 | 0.00 | 0.01 | 0.79 | 1.00 |
| 5.01_261.1438  | 0.00 | 0.03 | 0.99 | 1.00 |
| 9.03_260.5527  | 0.00 | 0.00 | 1.00 | 0.75 |
| 10.68_260.1641 | 0.00 | 0.00 | 0.98 | 1.00 |
| 6.81_268.0194  | 0.00 | 0.00 | 1.00 | 0.67 |
| 5.18_266.1406  | 0.00 | 0.25 | 0.71 | 1.00 |
| 5.27_264.2082  | 0.00 | 0.00 | 1.00 | 0.83 |
| 9.67_268.0195  | 0.00 | 0.00 | 0.87 | 1.00 |
| 5.84_281.1328  | 0.00 | 0.00 | 1.00 | 0.78 |
| 7.18_278.2110  | 0.00 | 0.00 | 0.93 | 1.00 |
| 6.07_276.1943  | 0.00 | 0.00 | 0.64 | 1.00 |
| 5.71_286.2118  | 0.00 | 0.00 | 1.00 | 0.93 |
| 9.01_283.1521  | 0.00 | 0.07 | 0.97 | 1.00 |
| 1.73_282.0649  | 0.00 | 0.02 | 0.91 | 1.00 |
| 7.72_281.1420  | 0.00 | 0.00 | 1.00 | 0.72 |
| 5.10_288.1525  | 0.00 | 0.05 | 0.97 | 1.00 |
| 5.22_295.1312  | 0.00 | 0.01 | 1.00 | 0.86 |
| 7.82_294.2085  | 0.00 | 0.00 | 0.89 | 1.00 |
| 4.87_293.1612  | 0.00 | 0.29 | 0.69 | 1.00 |
| 6.49_292.1923  | 0.00 | 0.02 | 1.00 | 0.68 |
| 3.76_299.1387  | 0.00 | 0.00 | 0.70 | 1.00 |
| 2.95_299.1385  | 0.00 | 0.00 | 0.87 | 1.00 |
| 4.74_298.0969  | 0.00 | 0.08 | 1.00 | 0.91 |
| 9.60_297.1694  | 0.00 | 0.01 | 1.00 | 1.00 |
| 7.19_296.2224  | 0.00 | 0.00 | 0.83 | 1.00 |
| 5.83_303.1558  | 0.00 | 0.01 | 1.00 | 0.98 |
| 7.70_303.1206  | 0.00 | 0.05 | 1.00 | 0.73 |
| 12.02_309.1921 | 0.00 | 0.01 | 0.91 | 1.00 |
| 3.90_307.1446  | 0.00 | 0.00 | 0.93 | 1.00 |
| 6.84_312.2197  | 0.00 | 0.00 | 0.85 | 1.00 |
| 10.59_311.1859 | 0.00 | 0.00 | 0.51 | 1.00 |
| 9.79_311.0549  | 0.00 | 0.00 | 0.82 | 1.00 |
| 7.47_310.2026  | 0.00 | 0.00 | 0.81 | 1.00 |
| 1.74_322.0446  | 0.00 | 0.02 | 0.94 | 1.00 |
| 9.13_319.1539  | 0.00 | 0.00 | 0.82 | 1.00 |
| 6.92_318.2094  | 0.00 | 0.00 | 1.00 | 0.98 |
| 6.00_328.7423  | 0.00 | 0.09 | 1.00 | 0.83 |
| 5.91_328.5999  | 0.00 | 0.00 | 0.60 | 1.00 |
| 7.34_326.2353  | 0.00 | 0.00 | 0.84 | 1.00 |
| 6.01_326.2353  | 0.00 | 0.00 | 0.99 | 1.00 |
| 4.97_326.0999  | 0.00 | 0.15 | 0.94 | 1.00 |
| 12.03_325.1706 | 0.00 | 0.00 | 0.99 | 1.00 |
| 6.31_335.7452  | 0.00 | 0.00 | 1.00 | 0.77 |
| 5.84_341.1007  | 0.00 | 0.00 | 0.99 | 1.00 |
| 6.07_337.1394  | 0.00 | 0.03 | 0.91 | 1.00 |
| 10.06_348.2310 | 0.00 | 0.00 | 1.00 | 0.76 |
| 7.48_345.1875  | 0.00 | 0.00 | 0.73 | 1.00 |
| 5.19_344.6196  | 0.00 | 0.04 | 1.00 | 0.77 |
| 7.37_344.2218  | 0.00 | 0.00 | 0.93 | 1.00 |
| 6.06_359.1205  | 0.00 | 0.00 | 1.00 | 0.82 |
| 4.84_357.1855  | 0.00 | 0.16 | 1.00 | 0.72 |
| 5.26_354.0787  | 0.00 | 0.16 | 1.00 | 0.97 |
| 8.24_352.2057  | 0.00 | 0.00 | 0.60 | 1.00 |
| 6.67_362.2335  | 0.00 | 0.00 | 0.62 | 1.00 |
| 6.51_360.2165  | 0.00 | 0.00 | 0.89 | 1.00 |
| 8.53_359.2035  | 0.00 | 0.09 | 1.00 | 0.90 |
| 8.77_368.2219  | 0.00 | 0.00 | 1.00 | 0.67 |
| 7.52_368.2211  | 0.00 | 0.00 | 0.98 | 1.00 |
| 9.80_367.0822  | 0.00 | 0.00 | 0.75 | 1.00 |
| 5.64_366.2063  | 0.00 | 0.00 | 0.90 | 1.00 |
| 7.43_374.2181  | 0.00 | 0.00 | 0.95 | 1.00 |
| 7.83_387.1861  | 0.00 | 0.00 | 0.93 | 1.00 |
| 9.80_387.0731  | 0.00 | 0.00 | 0.74 | 1.00 |
| 6.89_384.2172  | 0.00 | 0.01 | 1.00 | 0.92 |
| 6.24_384.2171  | 0.00 | 0.00 | 0.93 | 1.00 |

## D. Mass Spectral Data for Selected Features

|                |      |      |      |      |
|----------------|------|------|------|------|
| 8.63_398.2317  | 0.00 | 0.00 | 1.00 | 0.84 |
| 1.49_394.1142  | 0.00 | 0.00 | 1.00 | 0.97 |
| 9.40_418.0851  | 0.00 | 0.00 | 0.88 | 1.00 |
| 3.74_416.1928  | 0.00 | 0.04 | 0.77 | 1.00 |
| 8.66_429.0854  | 0.00 | 0.00 | 0.91 | 1.00 |
| 9.08_429.0845  | 0.00 | 0.00 | 0.97 | 1.00 |
| 8.04_432.2606  | 0.00 | 0.00 | 1.00 | 0.95 |
| 1.48_431.0890  | 0.00 | 0.37 | 1.00 | 0.90 |
| 9.07_451.0615  | 0.00 | 0.00 | 0.86 | 1.00 |
| 6.99_443.3240  | 0.00 | 0.08 | 0.84 | 1.00 |
| 9.73_443.1014  | 0.00 | 0.00 | 0.96 | 1.00 |
| 8.33_443.0954  | 0.00 | 0.00 | 1.00 | 0.99 |
| 8.80_443.0945  | 0.00 | 0.00 | 0.88 | 1.00 |
| 6.90_461.2902  | 0.00 | 0.00 | 1.00 | 0.96 |
| 5.90_459.3212  | 0.00 | 0.03 | 1.00 | 0.95 |
| 10.02_459.0960 | 0.00 | 0.00 | 1.00 | 0.98 |
| 9.03_457.1145  | 0.00 | 0.01 | 0.92 | 1.00 |
| 8.67_457.1133  | 0.00 | 0.00 | 0.94 | 1.00 |
| 11.52_456.3791 | 0.00 | 0.00 | 1.00 | 0.93 |
| 6.21_455.1906  | 0.00 | 0.15 | 0.85 | 1.00 |
| 9.81_454.0847  | 0.00 | 0.00 | 0.86 | 1.00 |
| 9.05_454.0819  | 0.00 | 0.00 | 0.97 | 1.00 |
| 6.42_472.2832  | 0.00 | 0.00 | 1.00 | 0.99 |
| 6.46_471.2466  | 0.00 | 0.03 | 1.00 | 0.83 |
| 9.02_468.1011  | 0.00 | 0.00 | 0.91 | 1.00 |
| 8.82_465.0807  | 0.00 | 0.00 | 0.68 | 1.00 |
| 9.79_462.0710  | 0.00 | 0.00 | 0.98 | 1.00 |
| 9.78_481.0499  | 0.00 | 0.00 | 0.92 | 1.00 |
| 4.15_476.2404  | 0.00 | 0.00 | 1.00 | 0.83 |
| 9.02_476.0877  | 0.00 | 0.00 | 1.00 | 0.85 |
| 7.51_499.2782  | 0.00 | 0.06 | 1.00 | 0.94 |
| 9.02_495.0687  | 0.00 | 0.00 | 1.00 | 0.99 |
| 4.37_494.2617  | 0.00 | 0.00 | 0.98 | 1.00 |
| 5.37_493.1709  | 0.00 | 0.00 | 0.91 | 1.00 |
| 1.49_491.1254  | 0.00 | 0.17 | 1.00 | 0.74 |
| 8.58_490.2972  | 0.00 | 0.00 | 0.89 | 1.00 |
| 9.79_513.1525  | 0.00 | 0.00 | 0.94 | 1.00 |
| 6.65_512.8485  | 0.00 | 0.00 | 1.00 | 0.95 |
| 9.09_512.3013  | 0.00 | 0.00 | 0.90 | 1.00 |
| 5.65_504.2609  | 0.00 | 0.00 | 1.00 | 0.55 |
| 5.64_515.2738  | 0.00 | 0.02 | 1.00 | 0.90 |
| 1.76_515.1445  | 0.00 | 0.00 | 0.74 | 1.00 |
| 10.06_526.3139 | 0.00 | 0.00 | 0.69 | 1.00 |
| 7.21_526.2839  | 0.00 | 0.08 | 1.00 | 1.00 |
| 6.79_549.3505  | 0.00 | 0.00 | 1.00 | 0.90 |
| 9.11_548.3433  | 0.00 | 0.02 | 0.83 | 1.00 |
| 7.20_544.2918  | 0.00 | 0.00 | 1.00 | 0.71 |
| 7.57_542.3960  | 0.00 | 0.34 | 0.86 | 1.00 |
| 12.03_565.3746 | 0.00 | 0.00 | 0.94 | 1.00 |
| 9.67_563.3802  | 0.00 | 0.00 | 0.86 | 1.00 |
| 6.90_555.3068  | 0.00 | 0.00 | 1.00 | 0.95 |
| 12.03_549.4012 | 0.00 | 0.00 | 1.00 | 0.93 |
| 9.02_549.3610  | 0.00 | 0.01 | 0.84 | 1.00 |
| 5.52_601.2501  | 0.00 | 0.00 | 1.00 | 0.97 |
| 9.79_576.6021  | 0.00 | 0.00 | 1.00 | 0.96 |
| 9.06_576.6005  | 0.00 | 0.00 | 1.00 | 0.87 |
| 1.25_639.8836  | 0.00 | 0.00 | 1.00 | 0.94 |
| 9.79_683.1204  | 0.00 | 0.00 | 1.00 | 0.92 |
| 9.78_885.1896  | 0.00 | 0.00 | 0.66 | 1.00 |
| 7.69_868.6024  | 0.00 | 0.00 | 1.00 | 0.84 |
| 7.60_846.3434  | 0.00 | 0.00 | 1.00 | 0.50 |
| 7.20_920.0962  | 0.00 | 0.00 | 1.00 | 0.94 |
| 9.80_907.1678  | 0.00 | 0.00 | 0.83 | 1.00 |
| 7.69_1031.1674 | 0.00 | 0.20 | 1.00 | 0.90 |
| 7.65_1000.0444 | 0.00 | 0.00 | 0.89 | 1.00 |
| 7.63_970.6960  | 0.00 | 0.00 | 0.61 | 1.00 |
| 7.63_942.9948  | 0.00 | 0.00 | 0.74 | 1.00 |
| 7.01_1221.4414 | 0.00 | 0.00 | 1.00 | 0.56 |
| 7.00_1216.1209 | 0.00 | 0.29 | 1.00 | 0.68 |
| 9.79_218.0234  | 0.00 | 0.02 | 0.79 | 1.00 |



## D. Mass Spectral Data for Selected Features

|                |      |      |      |      |
|----------------|------|------|------|------|
| 8.34_150.0928  | 0.00 | 0.04 | 0.96 | 1.00 |
| 9.78_465.0808  | 0.00 | 0.01 | 1.00 | 0.99 |
| 6.76_310.2021  | 0.00 | 0.00 | 1.00 | 0.93 |
| 1.64_174.0879  | 0.01 | 0.00 | 1.00 | 0.96 |
| 10.18_621.4210 | 0.01 | 0.00 | 0.87 | 1.00 |
| 8.54_447.2904  | 0.01 | 0.05 | 0.90 | 1.00 |
| 1.82_228.1004  | 0.01 | 0.00 | 1.00 | 0.93 |
| 9.81_269.0437  | 0.01 | 0.00 | 0.81 | 1.00 |
| 1.29_203.9309  | 0.01 | 0.00 | 0.92 | 1.00 |
| 1.64_246.1172  | 0.01 | 0.00 | 0.98 | 1.00 |
| 8.10_301.1534  | 0.01 | 0.05 | 1.00 | 0.98 |
| 7.48_177.0877  | 0.02 | 0.00 | 1.00 | 0.83 |
| 12.02_205.1953 | 0.02 | 0.00 | 0.96 | 1.00 |
| 8.74_542.3146  | 0.02 | 0.00 | 1.00 | 0.68 |
| 9.11_505.3321  | 0.02 | 0.00 | 0.91 | 1.00 |
| 3.22_235.1201  | 0.02 | 0.00 | 1.00 | 0.97 |
| 9.79_1349.2480 | 0.02 | 0.00 | 0.88 | 1.00 |
| 5.66_384.2168  | 0.02 | 0.00 | 1.00 | 0.89 |
| 8.52_491.3179  | 0.02 | 0.00 | 0.86 | 1.00 |
| 6.24_515.2753  | 0.02 | 0.01 | 1.00 | 0.79 |
| 4.82_393.2208  | 0.02 | 0.00 | 1.00 | 0.79 |
| 6.06_294.2084  | 0.02 | 0.00 | 0.89 | 1.00 |
| 8.29_401.1993  | 0.02 | 0.00 | 0.89 | 1.00 |
| 7.06_325.1861  | 0.02 | 0.14 | 1.00 | 0.99 |
| 10.18_223.2085 | 0.03 | 0.21 | 1.00 | 1.00 |
| 1.73_338.0231  | 0.04 | 0.00 | 1.00 | 0.98 |
| 6.65_282.2073  | 0.04 | 0.24 | 0.85 | 1.00 |
| 7.95_433.2783  | 0.04 | 0.10 | 0.90 | 1.00 |
| 5.43_377.1482  | 0.04 | 0.00 | 0.94 | 1.00 |
| 3.07_230.1126  | 0.05 | 0.12 | 1.00 | 0.79 |
| 16.15_710.1773 | 0.05 | 0.01 | 1.00 | 0.97 |
| 1.74_150.0789  | 0.05 | 0.00 | 0.87 | 1.00 |
| 1.70_260.1135  | 0.05 | 0.00 | 0.92 | 1.00 |
| 9.66_279.1583  | 0.06 | 0.00 | 0.85 | 1.00 |
| 6.95_218.1203  | 0.06 | 0.12 | 0.96 | 1.00 |
| 8.53_283.1523  | 0.06 | 0.14 | 0.91 | 1.00 |
| 7.06_221.1900  | 0.07 | 0.20 | 1.00 | 0.99 |
| 5.84_299.0939  | 0.07 | 0.03 | 1.00 | 0.95 |
| 8.53_207.1002  | 0.07 | 0.09 | 0.86 | 1.00 |
| 4.37_326.1802  | 0.07 | 0.42 | 1.00 | 0.93 |
| 8.53_177.0880  | 0.07 | 0.07 | 0.81 | 1.00 |
| 6.71_1160.7578 | 0.07 | 0.00 | 1.00 | 0.97 |
| 3.86_150.0940  | 0.08 | 0.14 | 0.97 | 1.00 |
| 5.83_325.1311  | 0.08 | 0.00 | 1.00 | 0.92 |
| 7.06_203.1787  | 0.08 | 0.15 | 0.98 | 1.00 |
| 9.67_319.1539  | 0.09 | 0.12 | 1.00 | 0.64 |
| 4.75_136.0625  | 0.09 | 0.00 | 0.92 | 1.00 |
| 3.83_198.1623  | 0.10 | 0.07 | 0.94 | 1.00 |
| 7.42_280.1237  | 0.11 | 0.29 | 0.92 | 1.00 |
| 5.97_286.6247  | 0.11 | 0.02 | 1.00 | 0.82 |
| 6.06_203.1781  | 0.11 | 0.19 | 0.86 | 1.00 |
| 3.80_288.1929  | 0.11 | 0.10 | 0.95 | 1.00 |
| 7.91_389.2523  | 0.12 | 0.05 | 0.86 | 1.00 |
| 1.65_159.0768  | 0.12 | 0.00 | 0.96 | 1.00 |
| 9.14_239.1284  | 0.12 | 0.11 | 0.89 | 1.00 |
| 1.73_288.1454  | 0.14 | 0.00 | 1.00 | 0.56 |
| 5.97_278.6345  | 0.14 | 0.04 | 1.00 | 0.88 |
| 5.11_231.1676  | 0.14 | 0.51 | 0.95 | 1.00 |
| 4.88_188.0708  | 0.15 | 0.26 | 0.80 | 1.00 |
| 6.39_336.2172  | 0.16 | 0.13 | 1.00 | 0.85 |
| 6.41_165.0905  | 0.17 | 0.11 | 0.94 | 1.00 |
| 3.85_276.1433  | 0.19 | 0.11 | 0.93 | 1.00 |
| 4.30_310.1305  | 0.19 | 0.04 | 0.95 | 1.00 |
| 6.66_264.1980  | 0.19 | 0.08 | 1.00 | 0.84 |
| 3.82_230.1126  | 0.20 | 0.12 | 0.86 | 1.00 |
| 4.87_329.1844  | 0.20 | 0.00 | 0.89 | 1.00 |
| 4.31_265.0552  | 0.20 | 0.00 | 1.00 | 0.82 |
| 4.64_137.0376  | 0.21 | 0.22 | 1.00 | 0.97 |
| 4.30_478.1379  | 0.22 | 0.05 | 1.00 | 0.75 |
| 7.25_371.1508  | 0.22 | 0.00 | 1.00 | 0.88 |



## D. Mass Spectral Data for Selected Features

|                |      |      |      |      |
|----------------|------|------|------|------|
| 4.12_413.1243  | 0.24 | 0.43 | 1.00 | 0.82 |
| 4.77_179.0472  | 0.28 | 0.51 | 0.90 | 1.00 |
| 7.64_999.9779  | 0.28 | 0.00 | 0.74 | 1.00 |
| 5.27_685.1761  | 0.29 | 0.00 | 1.00 | 0.91 |
| 4.81_464.2611  | 0.29 | 0.34 | 0.99 | 1.00 |
| 16.18_335.9929 | 0.30 | 0.00 | 1.00 | 0.84 |
| 4.86_372.1909  | 0.30 | 0.15 | 1.00 | 0.91 |
| 7.42_196.0651  | 0.33 | 0.17 | 0.85 | 1.00 |
| 9.41_281.1770  | 0.34 | 0.65 | 0.93 | 1.00 |
| 9.47_211.0868  | 0.34 | 0.60 | 0.93 | 1.00 |
| 5.11_307.1591  | 0.35 | 0.00 | 0.97 | 1.00 |
| 5.61_343.2002  | 0.37 | 0.08 | 0.90 | 1.00 |
| 3.80_194.0821  | 0.38 | 0.00 | 0.91 | 1.00 |
| 4.63_149.1104  | 0.40 | 0.65 | 0.88 | 1.00 |
| 12.62_416.2462 | 0.42 | 0.52 | 1.00 | 0.94 |
| 5.16_210.1137  | 0.44 | 0.44 | 0.96 | 1.00 |
| 3.85_258.1333  | 0.45 | 0.00 | 1.00 | 0.98 |
| 4.34_266.1408  | 0.46 | 0.36 | 0.98 | 1.00 |
| 5.34_191.1575  | 0.48 | 0.68 | 0.90 | 1.00 |
| 7.29_331.2114  | 0.50 | 0.72 | 0.94 | 1.00 |
| 12.43_386.2820 | 0.50 | 1.00 | 0.00 | 0.00 |
| 4.32_308.1712  | 0.50 | 0.18 | 1.00 | 0.91 |
| 14.78_323.2583 | 0.50 | 1.00 | 0.00 | 0.00 |
| 13.49_420.3478 | 0.51 | 1.00 | 0.00 | 0.00 |
| 10.60_346.3091 | 0.51 | 1.00 | 0.00 | 0.00 |
| 3.94_180.0961  | 0.51 | 0.23 | 0.88 | 1.00 |
| 13.00_413.3095 | 0.52 | 1.00 | 0.00 | 0.00 |
| 10.40_371.3275 | 0.52 | 1.00 | 0.04 | 0.00 |
| 9.48_225.1993  | 0.53 | 1.00 | 0.01 | 0.01 |
| 14.04_295.2283 | 0.54 | 1.00 | 0.00 | 0.00 |
| 6.81_807.1918  | 0.54 | 1.00 | 0.00 | 0.00 |
| 3.86_242.1126  | 0.55 | 0.60 | 0.90 | 1.00 |
| 13.53_339.2529 | 0.55 | 1.00 | 0.00 | 0.00 |
| 4.26_669.2631  | 0.56 | 1.00 | 0.00 | 0.00 |
| 11.80_235.1712 | 0.56 | 1.00 | 0.00 | 0.00 |
| 10.15_739.4618 | 0.56 | 1.00 | 0.00 | 0.00 |
| 14.41_309.2409 | 0.56 | 1.00 | 0.00 | 0.00 |
| 12.99_526.2341 | 0.56 | 1.00 | 0.08 | 0.03 |
| 10.53_531.4000 | 0.57 | 1.00 | 0.00 | 0.00 |
| 4.29_244.1199  | 0.57 | 0.59 | 1.00 | 0.98 |
| 4.40_158.0302  | 0.57 | 0.42 | 0.92 | 1.00 |
| 12.97_407.3144 | 0.58 | 1.00 | 0.00 | 0.00 |
| 12.98_399.3242 | 0.58 | 1.00 | 0.00 | 0.00 |
| 12.98_510.2581 | 0.59 | 1.00 | 0.12 | 0.00 |
| 6.40_263.1761  | 0.59 | 0.63 | 0.89 | 1.00 |
| 4.37_663.2850  | 0.59 | 1.00 | 0.00 | 0.00 |
| 13.98_433.3418 | 0.61 | 1.00 | 0.00 | 0.00 |
| 6.90_166.0720  | 0.61 | 1.00 | 0.00 | 0.00 |
| 5.72_240.1231  | 0.62 | 0.43 | 1.00 | 0.88 |
| 4.64_412.2067  | 0.62 | 1.00 | 0.11 | 0.05 |
| 6.19_181.1351  | 0.63 | 1.00 | 0.00 | 0.00 |
| 4.39_362.1069  | 0.63 | 0.55 | 1.00 | 0.89 |
| 10.97_401.2525 | 0.63 | 1.00 | 0.00 | 0.00 |
| 4.50_359.1197  | 0.64 | 0.72 | 1.00 | 0.99 |
| 6.15_485.2027  | 0.65 | 0.69 | 0.91 | 1.00 |
| 11.58_415.2745 | 0.65 | 1.00 | 0.00 | 0.00 |
| 12.62_273.1378 | 0.66 | 1.00 | 0.00 | 0.00 |
| 12.86_507.3281 | 0.66 | 1.00 | 0.29 | 0.26 |
| 12.97_290.7254 | 0.66 | 1.00 | 0.05 | 0.00 |
| 4.27_647.2871  | 0.67 | 1.00 | 0.04 | 0.00 |
| 12.82_551.3593 | 0.67 | 1.00 | 0.23 | 0.23 |
| 1.49_594.1582  | 0.67 | 0.74 | 1.00 | 0.92 |
| 11.44_223.2060 | 0.67 | 1.00 | 0.00 | 0.00 |
| 1.50_401.0693  | 0.67 | 0.62 | 1.00 | 0.90 |
| 6.40_439.1986  | 0.68 | 0.69 | 0.94 | 1.00 |
| 12.56_441.2657 | 0.70 | 1.00 | 0.37 | 0.29 |
| 4.59_251.1399  | 0.70 | 0.70 | 1.00 | 0.86 |
| 6.85_824.9348  | 0.70 | 1.00 | 0.00 | 0.00 |
| 16.15_442.8736 | 0.71 | 1.00 | 0.00 | 0.00 |
| 7.07_184.1710  | 0.72 | 1.00 | 0.00 | 0.00 |

## D. Mass Spectral Data for Selected Features

|                |      |      |      |      |
|----------------|------|------|------|------|
| 4.37_150.0945  | 0.72 | 1.00 | 0.00 | 0.00 |
| 12.79_595.3829 | 0.73 | 1.00 | 0.32 | 0.31 |
| 13.98_292.2624 | 0.73 | 1.00 | 0.22 | 0.21 |
| 3.89_518.1743  | 0.73 | 1.00 | 0.00 | 0.05 |
| 12.67_727.4605 | 0.74 | 1.00 | 0.37 | 0.34 |
| 11.18_473.3585 | 0.75 | 1.00 | 0.01 | 0.01 |
| 6.23_251.1781  | 0.75 | 0.82 | 0.94 | 1.00 |
| 12.70_683.4373 | 0.77 | 1.00 | 0.38 | 0.38 |
| 12.86_463.2998 | 0.77 | 1.00 | 0.31 | 0.00 |
| 12.74_443.3505 | 0.77 | 1.00 | 0.00 | 0.00 |
| 10.84_227.1557 | 0.77 | 0.85 | 1.00 | 0.99 |
| 12.97_547.4060 | 0.77 | 1.00 | 0.13 | 0.08 |
| 13.86_425.2896 | 0.78 | 1.00 | 0.17 | 0.23 |
| 5.26_147.0936  | 0.79 | 1.00 | 0.28 | 0.35 |
| 13.50_409.7445 | 0.80 | 1.00 | 0.06 | 0.00 |
| 12.61_771.4862 | 0.80 | 1.00 | 0.38 | 0.00 |
| 11.97_299.2600 | 0.80 | 1.00 | 0.00 | 0.00 |
| 13.50_524.2740 | 0.81 | 1.00 | 0.10 | 0.04 |
| 15.06_413.2647 | 0.81 | 1.00 | 0.19 | 0.19 |
| 12.86_502.3745 | 0.82 | 1.00 | 0.28 | 0.00 |
| 11.84_443.3878 | 0.82 | 1.00 | 0.03 | 0.00 |
| 11.03_354.1608 | 0.82 | 1.00 | 0.00 | 0.02 |
| 11.28_440.3462 | 0.82 | 1.00 | 0.00 | 0.00 |
| 12.98_282.2118 | 0.82 | 1.00 | 0.00 | 0.00 |
| 12.73_655.3845 | 0.83 | 1.00 | 0.53 | 0.47 |
| 12.74_639.4067 | 0.83 | 1.00 | 0.44 | 0.40 |
| 13.79_365.2675 | 0.84 | 1.00 | 0.00 | 0.00 |
| 12.80_567.3292 | 0.85 | 1.00 | 0.45 | 0.00 |
| 12.83_546.4021 | 0.86 | 1.00 | 0.28 | 0.12 |
| 10.38_401.3397 | 0.88 | 1.00 | 0.18 | 0.19 |
| 12.67_743.4367 | 0.88 | 1.00 | 0.53 | 0.47 |
| 12.70_699.4109 | 0.89 | 1.00 | 0.61 | 0.62 |
| 14.79_310.3109 | 0.90 | 1.00 | 0.57 | 0.67 |
| 12.78_611.3565 | 0.91 | 1.00 | 0.53 | 0.41 |
| 15.94_338.3442 | 0.91 | 1.00 | 0.41 | 0.48 |
| 13.48_341.2200 | 0.91 | 1.00 | 0.17 | 0.00 |
| 13.49_295.2258 | 0.91 | 1.00 | 0.00 | 0.00 |
| 1.47_508.0657  | 0.91 | 1.00 | 0.73 | 0.79 |
| 12.73_320.2010 | 0.94 | 1.00 | 0.52 | 0.24 |
| 4.49_225.1597  | 0.97 | 1.00 | 0.26 | 0.27 |
| 12.89_441.3208 | 0.99 | 1.00 | 0.18 | 0.20 |
| 12.78_590.4295 | 1.00 | 1.00 | 0.38 | 0.36 |
| 13.95_270.2746 | 1.00 | 1.00 | 0.40 | 0.47 |
| 10.36_211.6353 | 1.00 | 0.89 | 0.22 | 0.26 |
| 3.82_209.1275  | 1.00 | 0.90 | 0.55 | 0.58 |
| 11.31_225.6512 | 1.00 | 0.95 | 0.00 | 0.00 |
| 9.27_240.2315  | 1.00 | 0.88 | 0.00 | 0.00 |
| 10.39_268.2627 | 1.00 | 0.83 | 0.00 | 0.00 |
| 12.97_278.2028 | 1.00 | 0.62 | 0.09 | 0.02 |
| 11.44_291.1951 | 1.00 | 0.75 | 0.00 | 0.00 |
| 11.33_299.2599 | 1.00 | 0.77 | 0.00 | 0.00 |
| 12.62_313.2746 | 1.00 | 0.83 | 0.00 | 0.00 |
| 14.31_325.2414 | 1.00 | 0.74 | 0.00 | 0.00 |
| 14.82_332.2940 | 1.00 | 0.65 | 0.11 | 0.00 |
| 15.49_338.3442 | 1.00 | 0.86 | 0.00 | 0.23 |
| 15.92_360.3229 | 1.00 | 0.71 | 0.26 | 0.32 |
| 13.48_397.3392 | 1.00 | 0.75 | 0.00 | 0.00 |
| 10.78_415.3581 | 1.00 | 0.61 | 0.14 | 0.15 |
| 13.95_411.3586 | 1.00 | 0.78 | 0.00 | 0.00 |
| 13.27_419.3131 | 1.00 | 0.81 | 0.00 | 0.00 |
| 10.77_434.3251 | 1.00 | 0.58 | 0.00 | 0.00 |
| 12.86_485.3471 | 1.00 | 0.86 | 0.14 | 0.29 |
| 12.81_529.3766 | 1.00 | 0.77 | 0.39 | 0.00 |
| 12.97_555.3910 | 1.00 | 0.94 | 0.14 | 0.00 |
| 12.79_573.4039 | 1.00 | 0.73 | 0.21 | 0.24 |
| 12.75_617.4294 | 1.00 | 0.84 | 0.10 | 0.27 |
| 13.92_641.5490 | 1.00 | 0.85 | 0.00 | 0.00 |
| 4.37_685.2548  | 1.00 | 0.86 | 0.42 | 0.21 |
| 6.87_807.0837  | 1.00 | 0.57 | 0.00 | 0.00 |

## D. Mass Spectral Data for Selected Features

**Table S18.** Normalized heat map of features described as unique in figure 2b and c when comparing wild type *Nocardiosis sp. FU40 ΔApoS8* to the S4 streptomycin resistant mutant extract using OPLS-DA and extracting features from the generated S-plot with correlation coefficients  $\geq 0.9$ . Features are normalized to maximum intensity for that feature.

| Feature ID (RT_m/z) | WT   | WT   | S4   | S4   |
|---------------------|------|------|------|------|
| 1.50_165.0624       | 0.00 | 0.00 | 1.00 | 1.00 |
| 6.56_162.0938       | 0.00 | 0.00 | 0.63 | 1.00 |
| 5.78_170.1204       | 0.00 | 0.00 | 0.55 | 1.00 |
| 5.02_180.1014       | 0.00 | 0.00 | 0.73 | 1.00 |
| 4.95_177.1399       | 0.00 | 0.17 | 0.57 | 1.00 |
| 4.14_186.1168       | 0.00 | 0.00 | 1.00 | 0.70 |
| 4.02_198.1143       | 0.00 | 0.00 | 0.81 | 1.00 |
| 9.08_196.0187       | 0.00 | 0.00 | 0.85 | 1.00 |
| 9.80_203.0277       | 0.00 | 0.00 | 0.57 | 1.00 |
| 7.49_207.0994       | 0.00 | 0.05 | 0.62 | 1.00 |
| 4.84_205.1323       | 0.00 | 0.00 | 0.63 | 1.00 |
| 5.48_229.0656       | 0.00 | 0.00 | 0.51 | 1.00 |
| 4.61_230.0715       | 0.00 | 0.18 | 0.90 | 1.00 |
| 4.27_237.0717       | 0.00 | 0.26 | 1.00 | 0.73 |
| 9.80_241.0261       | 0.00 | 0.00 | 1.00 | 0.67 |
| 5.81_248.1281       | 0.00 | 0.15 | 0.83 | 1.00 |
| 5.04_244.1219       | 0.00 | 0.00 | 1.00 | 0.60 |
| 13.78_251.2405      | 0.00 | 0.00 | 0.96 | 1.00 |
| 4.31_249.0807       | 0.00 | 0.00 | 0.78 | 1.00 |
| 8.08_252.0397       | 0.00 | 0.00 | 0.67 | 1.00 |
| 6.01_252.0391       | 0.00 | 0.00 | 0.93 | 1.00 |
| 1.78_262.1278       | 0.00 | 0.00 | 0.87 | 1.00 |
| 5.01_261.1438       | 0.00 | 0.17 | 0.72 | 1.00 |
| 5.18_266.1406       | 0.00 | 0.19 | 1.00 | 0.90 |
| 11.95_266.1298      | 0.00 | 0.00 | 0.74 | 1.00 |
| 7.50_283.1523       | 0.00 | 0.03 | 0.63 | 1.00 |
| 1.73_282.0649       | 0.00 | 0.01 | 0.67 | 1.00 |
| 4.87_293.1612       | 0.00 | 0.11 | 1.00 | 0.86 |
| 4.74_298.0969       | 0.00 | 0.15 | 1.00 | 0.99 |
| 6.00_308.2238       | 0.00 | 0.00 | 1.00 | 0.90 |
| 5.82_322.1007       | 0.00 | 0.00 | 1.00 | 0.69 |
| 1.74_322.0446       | 0.00 | 0.01 | 0.99 | 1.00 |
| 8.76_329.1942       | 0.00 | 0.14 | 1.00 | 1.00 |
| 10.73_340.1475      | 0.00 | 0.10 | 0.65 | 1.00 |
| 14.63_339.2533      | 0.00 | 0.00 | 1.00 | 0.84 |
| 6.07_337.1394       | 0.00 | 0.13 | 0.86 | 1.00 |
| 5.19_344.6196       | 0.00 | 0.07 | 1.00 | 0.85 |
| 5.26_354.0787       | 0.00 | 0.14 | 1.00 | 0.98 |
| 4.01_351.5992       | 0.00 | 0.00 | 0.59 | 1.00 |
| 8.53_359.2035       | 0.00 | 0.10 | 0.54 | 1.00 |
| 5.64_366.2063       | 0.00 | 0.00 | 1.00 | 0.72 |
| 1.49_394.1142       | 0.00 | 0.00 | 0.78 | 1.00 |
| 14.04_420.3477      | 0.00 | 0.23 | 1.00 | 0.79 |
| 11.52_456.3791      | 0.00 | 0.00 | 1.00 | 0.97 |
| 6.21_455.1906       | 0.00 | 0.09 | 0.55 | 1.00 |
| 6.98_499.2793       | 0.00 | 0.00 | 0.78 | 1.00 |
| 5.64_515.2738       | 0.00 | 0.02 | 0.68 | 1.00 |
| 1.49_527.1567       | 0.00 | 0.00 | 1.00 | 0.53 |
| 5.52_601.2501       | 0.00 | 0.00 | 0.57 | 1.00 |
| 1.25_639.8836       | 0.00 | 0.00 | 0.78 | 1.00 |
| 12.72_634.4531      | 0.00 | 0.00 | 1.00 | 0.79 |
| 7.21_916.0943       | 0.00 | 0.00 | 0.69 | 1.00 |
| 3.22_235.1201       | 0.01 | 0.00 | 1.00 | 0.79 |
| 16.15_710.1773      | 0.02 | 0.00 | 0.84 | 1.00 |
| 1.73_338.0231       | 0.02 | 0.00 | 0.93 | 1.00 |
| 1.74_150.0789       | 0.03 | 0.00 | 0.67 | 1.00 |
| 3.86_150.0940       | 0.04 | 0.07 | 0.64 | 1.00 |
| 5.43_377.1482       | 0.04 | 0.00 | 0.57 | 1.00 |
| 6.24_515.2753       | 0.05 | 0.02 | 0.69 | 1.00 |
| 1.82_228.1004       | 0.05 | 0.01 | 1.00 | 0.68 |
| 1.70_260.1135       | 0.05 | 0.00 | 1.00 | 0.98 |
| 4.87_329.1844       | 0.07 | 0.00 | 0.55 | 1.00 |
| 11.79_304.1184      | 0.08 | 0.42 | 0.97 | 1.00 |
| 6.41_165.0905       | 0.08 | 0.05 | 0.87 | 1.00 |

## D. Mass Spectral Data for Selected Features

|                |      |      |      |      |
|----------------|------|------|------|------|
| 11.43_466.2973 | 0.09 | 0.27 | 0.98 | 1.00 |
| 4.30_310.1305  | 0.10 | 0.02 | 0.65 | 1.00 |
| 6.89_843.7588  | 0.11 | 0.00 | 1.00 | 0.69 |
| 15.37_230.0721 | 0.11 | 0.37 | 1.00 | 0.84 |
| 16.24_268.0194 | 0.11 | 0.22 | 1.00 | 0.94 |
| 3.83_198.1623  | 0.12 | 0.09 | 0.63 | 1.00 |
| 16.22_252.0441 | 0.13 | 0.23 | 1.00 | 0.71 |
| 4.30_478.1379  | 0.14 | 0.03 | 0.79 | 1.00 |
| 5.27_685.1761  | 0.17 | 0.00 | 0.60 | 1.00 |
| 4.12_413.1243  | 0.18 | 0.31 | 0.99 | 1.00 |
| 4.34_266.1408  | 0.21 | 0.16 | 1.00 | 0.65 |
| 5.16_210.1137  | 0.22 | 0.21 | 0.63 | 1.00 |
| 3.85_276.1433  | 0.22 | 0.13 | 1.00 | 0.99 |
| 3.80_194.0821  | 0.23 | 0.00 | 1.00 | 0.91 |
| 4.26_450.2439  | 0.24 | 0.01 | 0.78 | 1.00 |
| 13.79_365.2675 | 0.25 | 0.29 | 1.00 | 0.85 |
| 4.38_242.1131  | 0.26 | 0.47 | 1.00 | 0.76 |
| 5.61_343.2002  | 0.26 | 0.06 | 0.84 | 1.00 |
| 16.15_365.1085 | 0.28 | 0.00 | 0.67 | 1.00 |
| 12.73_328.1928 | 0.28 | 0.00 | 0.76 | 1.00 |
| 3.85_258.1333  | 0.28 | 0.00 | 0.69 | 1.00 |
| 5.71_249.1598  | 0.29 | 0.40 | 0.83 | 1.00 |
| 4.32_308.1712  | 0.29 | 0.10 | 1.00 | 0.79 |
| 4.88_188.0708  | 0.29 | 0.50 | 0.78 | 1.00 |
| 4.70_221.1315  | 0.31 | 0.45 | 0.74 | 1.00 |
| 1.50_423.1007  | 0.33 | 0.49 | 1.00 | 0.76 |
| 4.86_372.1909  | 0.35 | 0.18 | 0.71 | 1.00 |
| 4.59_251.1399  | 0.38 | 0.37 | 1.00 | 0.91 |
| 3.82_209.1275  | 0.38 | 0.34 | 0.91 | 1.00 |
| 6.10_320.1966  | 0.40 | 0.00 | 0.77 | 1.00 |
| 6.34_150.0787  | 0.41 | 0.39 | 0.71 | 1.00 |
| 4.60_303.1563  | 0.43 | 0.30 | 1.00 | 0.71 |
| 6.02_274.1066  | 0.44 | 0.31 | 0.85 | 1.00 |
| 12.43_386.2820 | 0.50 | 1.00 | 0.00 | 0.00 |
| 13.97_282.2786 | 0.50 | 0.43 | 0.75 | 1.00 |
| 13.49_420.3478 | 0.51 | 1.00 | 0.04 | 0.02 |
| 10.60_346.3091 | 0.51 | 1.00 | 0.00 | 0.00 |
| 3.86_242.1126  | 0.51 | 0.56 | 0.78 | 1.00 |
| 10.70_288.2557 | 0.52 | 1.00 | 0.00 | 0.00 |
| 3.94_180.0961  | 0.53 | 0.24 | 0.94 | 1.00 |
| 9.48_225.1993  | 0.53 | 1.00 | 0.01 | 0.00 |
| 13.53_339.2529 | 0.55 | 1.00 | 0.00 | 0.00 |
| 4.26_669.2631  | 0.56 | 1.00 | 0.00 | 0.01 |
| 11.80_235.1712 | 0.56 | 1.00 | 0.02 | 0.10 |
| 3.80_119.0369  | 0.56 | 1.00 | 0.14 | 0.00 |
| 10.15_739.4618 | 0.56 | 1.00 | 0.03 | 0.04 |
| 10.53_531.4000 | 0.57 | 1.00 | 0.00 | 0.00 |
| 6.95_368.2220  | 0.57 | 1.00 | 0.00 | 0.00 |
| 12.97_407.3144 | 0.58 | 1.00 | 0.13 | 0.08 |
| 12.98_399.3242 | 0.58 | 1.00 | 0.13 | 0.08 |
| 4.09_573.1785  | 0.58 | 1.00 | 0.00 | 0.00 |
| 4.37_663.2850  | 0.59 | 1.00 | 0.00 | 0.00 |
| 3.79_359.1699  | 0.60 | 0.30 | 1.00 | 0.89 |
| 13.98_433.3418 | 0.61 | 1.00 | 0.00 | 0.02 |
| 6.90_166.0720  | 0.61 | 1.00 | 0.00 | 0.00 |
| 4.64_412.2067  | 0.62 | 1.00 | 0.22 | 0.25 |
| 6.19_181.1351  | 0.63 | 1.00 | 0.00 | 0.00 |
| 11.58_415.2745 | 0.65 | 1.00 | 0.06 | 0.12 |
| 4.27_647.2871  | 0.67 | 1.00 | 0.05 | 0.09 |
| 11.44_223.2060 | 0.67 | 1.00 | 0.00 | 0.00 |
| 1.48_497.0811  | 0.68 | 0.39 | 1.00 | 0.99 |
| 8.08_219.1411  | 0.68 | 1.00 | 0.00 | 0.00 |
| 7.62_970.6124  | 0.70 | 1.00 | 0.00 | 0.00 |
| 4.81_506.2950  | 0.71 | 1.00 | 0.00 | 0.00 |
| 16.15_442.8736 | 0.71 | 1.00 | 0.00 | 0.00 |
| 7.07_184.1710  | 0.72 | 1.00 | 0.38 | 0.28 |
| 4.37_150.0945  | 0.72 | 1.00 | 0.00 | 0.01 |
| 3.89_518.1743  | 0.73 | 1.00 | 0.05 | 0.01 |
| 11.18_473.3585 | 0.75 | 1.00 | 0.03 | 0.02 |
| 12.74_443.3505 | 0.77 | 1.00 | 0.00 | 0.00 |

## D. Mass Spectral Data for Selected Features

|                |      |      |      |      |
|----------------|------|------|------|------|
| 12.97_547.4060 | 0.77 | 1.00 | 0.34 | 0.23 |
| 15.06_413.2647 | 0.81 | 1.00 | 0.59 | 0.55 |
| 11.84_443.3878 | 0.82 | 1.00 | 0.04 | 0.04 |
| 11.03_354.1608 | 0.82 | 1.00 | 0.00 | 0.00 |
| 11.28_440.3462 | 0.82 | 1.00 | 0.00 | 0.00 |
| 12.98_282.2118 | 0.82 | 1.00 | 0.07 | 0.00 |
| 5.16_237.1592  | 0.87 | 1.00 | 0.00 | 0.00 |
| 10.38_401.3397 | 0.88 | 1.00 | 0.18 | 0.23 |
| 9.26_219.1735  | 0.88 | 1.00 | 0.00 | 0.00 |
| 13.49_295.2258 | 0.91 | 1.00 | 0.00 | 0.00 |
| 4.49_225.1597  | 0.97 | 1.00 | 0.18 | 0.14 |
| 5.94_213.1018  | 1.00 | 0.76 | 0.00 | 0.00 |
| 10.36_211.6353 | 1.00 | 0.89 | 0.06 | 0.01 |
| 11.31_225.6512 | 1.00 | 0.95 | 0.00 | 0.00 |
| 9.27_240.2315  | 1.00 | 0.88 | 0.16 | 0.50 |
| 10.39_268.2627 | 1.00 | 0.83 | 0.00 | 0.07 |
| 6.59_273.1670  | 1.00 | 0.84 | 0.46 | 0.23 |
| 11.44_291.1951 | 1.00 | 0.75 | 0.00 | 0.00 |
| 12.62_313.2746 | 1.00 | 0.83 | 0.43 | 0.46 |
| 6.39_336.2172  | 1.00 | 0.82 | 0.00 | 0.00 |
| 14.82_332.2940 | 1.00 | 0.65 | 0.08 | 0.00 |
| 15.49_338.3442 | 1.00 | 0.86 | 0.10 | 0.00 |
| 13.48_397.3392 | 1.00 | 0.75 | 0.00 | 0.00 |
| 10.78_415.3581 | 1.00 | 0.61 | 0.24 | 0.18 |
| 13.95_411.3586 | 1.00 | 0.78 | 0.06 | 0.08 |
| 13.27_419.3131 | 1.00 | 0.81 | 0.00 | 0.00 |
| 10.77_434.3251 | 1.00 | 0.58 | 0.00 | 0.00 |
| 10.98_442.3651 | 1.00 | 0.78 | 0.16 | 0.14 |
| 12.97_555.3910 | 1.00 | 0.94 | 0.52 | 0.61 |
| 13.92_641.5490 | 1.00 | 0.85 | 0.00 | 0.00 |
| 4.37_685.2548  | 1.00 | 0.86 | 0.10 | 0.00 |
| 7.66_916.7249  | 1.00 | 0.76 | 0.00 | 0.26 |
| 7.00_916.3325  | 1.00 | 0.59 | 0.00 | 0.00 |

## D. Mass Spectral Data for Selected Features

**Table S19.** Normalized heat map of features described as unique in figure 2b and c when comparing wild type *Nocardiosis sp. FU40 ΔApoS8* to the S5 streptomycin resistant mutant extract using OPLS-DA and extracting features from the generated S-plot with correlation coefficients  $\geq 0.9$ . Features are normalized to maximum intensity for that feature.

| Feature ID (RT_m/z) | WT   | WT   | S5   | S5   |
|---------------------|------|------|------|------|
| 12.03_135.1163      | 0.00 | 0.04 | 0.79 | 1.00 |
| 12.03_123.1165      | 0.00 | 0.00 | 0.84 | 1.00 |
| 4.95_114.0908       | 0.00 | 0.00 | 0.96 | 1.00 |
| 1.50_103.5345       | 0.00 | 0.00 | 0.92 | 1.00 |
| 12.03_149.1327      | 0.00 | 0.00 | 0.88 | 1.00 |
| 1.50_165.0624       | 0.00 | 0.00 | 1.00 | 0.96 |
| 6.56_162.0938       | 0.00 | 0.00 | 0.82 | 1.00 |
| 16.16_174.0876      | 0.00 | 0.00 | 0.60 | 1.00 |
| 5.78_170.1204       | 0.00 | 0.00 | 0.97 | 1.00 |
| 2.44_166.0747       | 0.00 | 0.24 | 1.00 | 0.91 |
| 6.60_180.1017       | 0.00 | 0.01 | 0.89 | 1.00 |
| 5.02_180.1014       | 0.00 | 0.00 | 0.90 | 1.00 |
| 4.95_177.1399       | 0.00 | 0.27 | 0.99 | 1.00 |
| 9.26_191.1250       | 0.00 | 0.00 | 0.89 | 1.00 |
| 9.12_191.0134       | 0.00 | 0.00 | 0.88 | 1.00 |
| 4.14_186.1168       | 0.00 | 0.00 | 0.81 | 1.00 |
| 4.02_198.1143       | 0.00 | 0.00 | 1.00 | 0.61 |
| 8.84_203.1804       | 0.00 | 0.00 | 0.85 | 1.00 |
| 8.12_203.1781       | 0.00 | 0.00 | 0.96 | 1.00 |
| 6.22_203.0786       | 0.00 | 0.02 | 1.00 | 0.92 |
| 9.80_203.0277       | 0.00 | 0.00 | 0.93 | 1.00 |
| 7.49_207.0994       | 0.00 | 0.06 | 0.86 | 1.00 |
| 1.30_205.9283       | 0.00 | 0.00 | 1.00 | 0.89 |
| 4.84_205.1323       | 0.00 | 0.00 | 1.00 | 0.89 |
| 1.32_211.8786       | 0.00 | 0.00 | 1.00 | 0.92 |
| 1.49_211.0584       | 0.00 | 0.25 | 1.00 | 0.88 |
| 9.81_210.0363       | 0.00 | 0.00 | 1.00 | 0.65 |
| 9.41_219.0312       | 0.00 | 0.00 | 1.00 | 0.77 |
| 8.84_221.1903       | 0.00 | 0.00 | 0.98 | 1.00 |
| 4.61_230.0715       | 0.00 | 0.25 | 1.00 | 0.81 |
| 10.62_236.1643      | 0.00 | 0.00 | 1.00 | 0.97 |
| 5.11_236.1306       | 0.00 | 0.11 | 0.88 | 1.00 |
| 8.54_235.1344       | 0.00 | 0.00 | 0.96 | 1.00 |
| 7.38_246.1513       | 0.00 | 0.00 | 0.62 | 1.00 |
| 2.62_252.0382       | 0.00 | 0.47 | 0.96 | 1.00 |
| 4.31_249.0807       | 0.00 | 0.00 | 0.73 | 1.00 |
| 10.50_252.0400      | 0.00 | 0.11 | 0.52 | 1.00 |
| 8.08_252.0397       | 0.00 | 0.00 | 1.00 | 0.97 |
| 4.56_252.0394       | 0.00 | 0.09 | 0.81 | 1.00 |
| 6.01_252.0391       | 0.00 | 0.00 | 0.56 | 1.00 |
| 7.48_252.0388       | 0.00 | 0.00 | 0.82 | 1.00 |
| 3.58_252.0387       | 0.00 | 0.35 | 1.00 | 1.00 |
| 3.87_257.1146       | 0.00 | 0.34 | 0.72 | 1.00 |
| 9.81_253.5524       | 0.00 | 0.12 | 1.00 | 0.57 |
| 12.02_263.1978      | 0.00 | 0.03 | 0.93 | 1.00 |
| 1.78_262.1278       | 0.00 | 0.00 | 0.74 | 1.00 |
| 5.86_262.1048       | 0.00 | 0.22 | 0.91 | 1.00 |
| 10.71_261.1779      | 0.00 | 0.01 | 0.90 | 1.00 |
| 5.01_261.1438       | 0.00 | 0.16 | 1.00 | 0.98 |
| 9.03_260.5527       | 0.00 | 0.00 | 1.00 | 0.76 |
| 6.81_268.0194       | 0.00 | 0.00 | 0.64 | 1.00 |
| 6.28_268.0191       | 0.00 | 0.13 | 1.00 | 0.72 |
| 10.77_267.1616      | 0.00 | 0.05 | 0.99 | 1.00 |
| 5.18_266.1406       | 0.00 | 0.28 | 1.00 | 0.89 |
| 5.27_264.2082       | 0.00 | 0.00 | 0.97 | 1.00 |
| 4.60_268.0196       | 0.00 | 0.00 | 0.83 | 1.00 |
| 9.12_279.1585       | 0.00 | 0.00 | 0.54 | 1.00 |
| 7.18_278.2110       | 0.00 | 0.00 | 0.79 | 1.00 |
| 6.07_276.1943       | 0.00 | 0.00 | 1.00 | 0.74 |
| 7.50_283.1523       | 0.00 | 0.03 | 0.93 | 1.00 |
| 1.73_282.0649       | 0.00 | 0.01 | 0.74 | 1.00 |
| 7.72_281.1420       | 0.00 | 0.00 | 1.00 | 0.98 |
| 3.86_294.1559       | 0.00 | 0.44 | 0.98 | 1.00 |
| 7.15_293.2251       | 0.00 | 0.00 | 0.69 | 1.00 |

## D. Mass Spectral Data for Selected Features

|                |      |      |      |      |
|----------------|------|------|------|------|
| 4.87_293.1612  | 0.00 | 0.19 | 1.00 | 0.61 |
| 6.49_292.1923  | 0.00 | 0.03 | 0.89 | 1.00 |
| 3.76_299.1387  | 0.00 | 0.04 | 0.68 | 1.00 |
| 7.73_298.2024  | 0.00 | 0.00 | 0.88 | 1.00 |
| 4.74_298.0969  | 0.00 | 0.09 | 1.00 | 0.92 |
| 9.60_297.1694  | 0.00 | 0.01 | 1.00 | 1.00 |
| 7.19_296.2224  | 0.00 | 0.00 | 0.85 | 1.00 |
| 12.02_309.1921 | 0.00 | 0.01 | 0.90 | 1.00 |
| 6.00_308.2238  | 0.00 | 0.00 | 1.00 | 0.57 |
| 6.06_312.2197  | 0.00 | 0.00 | 1.00 | 0.83 |
| 7.24_312.2197  | 0.00 | 0.00 | 0.97 | 1.00 |
| 10.59_311.1859 | 0.00 | 0.00 | 0.80 | 1.00 |
| 5.82_322.1007  | 0.00 | 0.00 | 1.00 | 0.99 |
| 1.74_322.0446  | 0.00 | 0.01 | 0.78 | 1.00 |
| 9.13_319.1539  | 0.00 | 0.00 | 0.91 | 1.00 |
| 6.92_318.2094  | 0.00 | 0.00 | 1.00 | 0.94 |
| 12.03_325.1706 | 0.00 | 0.00 | 0.84 | 1.00 |
| 8.76_329.1942  | 0.00 | 0.09 | 0.81 | 1.00 |
| 10.73_340.1475 | 0.00 | 0.14 | 1.00 | 0.71 |
| 5.99_338.1374  | 0.00 | 0.00 | 1.00 | 0.97 |
| 6.22_346.2031  | 0.00 | 0.00 | 0.95 | 1.00 |
| 7.48_345.1875  | 0.00 | 0.00 | 1.00 | 0.72 |
| 7.37_344.2218  | 0.00 | 0.00 | 0.73 | 1.00 |
| 5.26_354.0787  | 0.00 | 0.18 | 0.81 | 1.00 |
| 4.01_351.5992  | 0.00 | 0.00 | 1.00 | 0.57 |
| 6.67_362.2335  | 0.00 | 0.00 | 1.00 | 0.74 |
| 6.51_360.2165  | 0.00 | 0.00 | 0.96 | 1.00 |
| 8.53_359.2035  | 0.00 | 0.13 | 1.00 | 0.80 |
| 7.52_368.2211  | 0.00 | 0.00 | 0.71 | 1.00 |
| 9.80_367.0822  | 0.00 | 0.00 | 1.00 | 1.00 |
| 7.83_387.1861  | 0.00 | 0.00 | 1.00 | 1.00 |
| 9.80_387.0731  | 0.00 | 0.00 | 0.59 | 1.00 |
| 6.24_384.2171  | 0.00 | 0.00 | 0.71 | 1.00 |
| 1.49_394.1142  | 0.00 | 0.00 | 0.69 | 1.00 |
| 9.08_429.0845  | 0.00 | 0.00 | 1.00 | 0.88 |
| 4.02_423.1940  | 0.00 | 0.00 | 0.75 | 1.00 |
| 7.98_431.2698  | 0.00 | 0.06 | 0.90 | 1.00 |
| 1.48_431.0890  | 0.00 | 0.30 | 0.88 | 1.00 |
| 9.07_451.0615  | 0.00 | 0.00 | 0.68 | 1.00 |
| 6.99_443.3240  | 0.00 | 0.23 | 0.87 | 1.00 |
| 9.73_443.1014  | 0.00 | 0.00 | 1.00 | 0.95 |
| 10.02_459.0960 | 0.00 | 0.00 | 0.87 | 1.00 |
| 9.03_457.1145  | 0.00 | 0.02 | 0.69 | 1.00 |
| 6.21_455.1906  | 0.00 | 0.09 | 0.66 | 1.00 |
| 6.46_471.2466  | 0.00 | 0.03 | 0.93 | 1.00 |
| 9.79_462.0710  | 0.00 | 0.00 | 0.89 | 1.00 |
| 9.78_481.0499  | 0.00 | 0.00 | 0.92 | 1.00 |
| 9.02_479.0963  | 0.00 | 0.00 | 0.83 | 1.00 |
| 7.51_499.2782  | 0.00 | 0.02 | 1.00 | 0.97 |
| 4.37_494.2617  | 0.00 | 0.00 | 0.78 | 1.00 |
| 1.49_527.1567  | 0.00 | 0.00 | 0.55 | 1.00 |
| 7.21_526.2839  | 0.00 | 0.15 | 0.70 | 1.00 |
| 7.20_544.2918  | 0.00 | 0.00 | 1.00 | 0.80 |
| 12.03_549.4012 | 0.00 | 0.00 | 0.87 | 1.00 |
| 5.52_601.2501  | 0.00 | 0.00 | 0.86 | 1.00 |
| 5.18_599.2879  | 0.00 | 0.00 | 1.00 | 0.78 |
| 1.76_588.1814  | 0.00 | 0.00 | 0.69 | 1.00 |
| 1.25_639.8836  | 0.00 | 0.00 | 1.00 | 0.77 |
| 9.79_683.1204  | 0.00 | 0.00 | 1.00 | 0.63 |
| 9.80_907.1678  | 0.00 | 0.00 | 1.00 | 1.00 |
| 7.62_891.8938  | 0.00 | 0.00 | 1.00 | 0.76 |
| 8.34_150.0928  | 0.00 | 0.05 | 1.00 | 0.94 |
| 9.79_218.0234  | 0.01 | 0.05 | 0.92 | 1.00 |
| 6.24_515.2753  | 0.01 | 0.00 | 0.77 | 1.00 |
| 1.29_203.9309  | 0.01 | 0.00 | 1.00 | 0.72 |
| 7.48_177.0877  | 0.01 | 0.00 | 0.69 | 1.00 |
| 8.10_301.1534  | 0.01 | 0.03 | 0.81 | 1.00 |
| 5.66_384.2168  | 0.01 | 0.00 | 0.81 | 1.00 |
| 12.02_205.1953 | 0.01 | 0.00 | 0.84 | 1.00 |
| 9.78_465.0808  | 0.02 | 0.04 | 0.81 | 1.00 |



## D. Mass Spectral Data for Selected Features

|                |      |      |      |      |
|----------------|------|------|------|------|
| 6.76_310.2021  | 0.02 | 0.00 | 0.93 | 1.00 |
| 8.29_401.1993  | 0.02 | 0.00 | 0.93 | 1.00 |
| 6.06_294.2084  | 0.02 | 0.00 | 0.75 | 1.00 |
| 3.22_235.1201  | 0.03 | 0.00 | 1.00 | 0.84 |
| 16.15_710.1773 | 0.03 | 0.01 | 1.00 | 0.97 |
| 9.66_279.1583  | 0.03 | 0.00 | 0.73 | 1.00 |
| 1.73_338.0231  | 0.04 | 0.00 | 0.82 | 1.00 |
| 1.74_150.0789  | 0.04 | 0.00 | 1.00 | 0.99 |
| 10.18_223.2085 | 0.04 | 0.25 | 1.00 | 0.79 |
| 3.07_230.1126  | 0.05 | 0.11 | 0.79 | 1.00 |
| 5.97_286.6247  | 0.05 | 0.01 | 0.92 | 1.00 |
| 8.53_283.1523  | 0.05 | 0.10 | 0.92 | 1.00 |
| 4.37_326.1802  | 0.05 | 0.29 | 0.77 | 1.00 |
| 6.95_218.1203  | 0.05 | 0.10 | 0.89 | 1.00 |
| 9.14_239.1284  | 0.05 | 0.05 | 1.00 | 0.70 |
| 7.42_280.1237  | 0.06 | 0.16 | 0.95 | 1.00 |
| 8.53_177.0880  | 0.06 | 0.06 | 0.72 | 1.00 |
| 3.86_150.0940  | 0.06 | 0.11 | 0.92 | 1.00 |
| 10.52_673.3745 | 0.06 | 0.09 | 0.87 | 1.00 |
| 8.53_207.1002  | 0.06 | 0.07 | 0.84 | 1.00 |
| 5.43_377.1482  | 0.06 | 0.00 | 0.86 | 1.00 |
| 5.97_278.6345  | 0.06 | 0.02 | 1.00 | 0.96 |
| 4.75_136.0625  | 0.07 | 0.00 | 0.66 | 1.00 |
| 1.53_143.0837  | 0.08 | 0.10 | 0.93 | 1.00 |
| 6.72_1450.6973 | 0.08 | 0.02 | 1.00 | 0.92 |
| 6.41_165.0905  | 0.09 | 0.06 | 0.83 | 1.00 |
| 1.77_218.1042  | 0.09 | 0.02 | 0.92 | 1.00 |
| 7.89_192.1015  | 0.10 | 0.17 | 0.80 | 1.00 |
| 7.42_196.0651  | 0.10 | 0.05 | 0.58 | 1.00 |
| 7.06_221.1900  | 0.12 | 0.36 | 1.00 | 0.97 |
| 15.37_230.0721 | 0.12 | 0.40 | 0.82 | 1.00 |
| 4.30_478.1379  | 0.13 | 0.03 | 0.66 | 1.00 |
| 9.47_211.0868  | 0.13 | 0.23 | 0.82 | 1.00 |
| 3.83_198.1623  | 0.13 | 0.09 | 0.86 | 1.00 |
| 4.87_329.1844  | 0.13 | 0.00 | 0.95 | 1.00 |
| 3.82_230.1126  | 0.14 | 0.09 | 0.81 | 1.00 |
| 6.06_203.1781  | 0.15 | 0.26 | 0.83 | 1.00 |
| 7.06_203.1787  | 0.15 | 0.28 | 0.88 | 1.00 |
| 4.30_310.1305  | 0.15 | 0.03 | 0.80 | 1.00 |
| 3.85_276.1433  | 0.16 | 0.09 | 0.78 | 1.00 |
| 6.73_1161.1593 | 0.16 | 0.04 | 0.85 | 1.00 |
| 5.96_534.2942  | 0.16 | 0.04 | 0.97 | 1.00 |
| 6.78_176.0714  | 0.17 | 0.28 | 0.81 | 1.00 |
| 6.71_1160.7578 | 0.17 | 0.00 | 1.00 | 0.86 |
| 9.41_281.1770  | 0.19 | 0.36 | 0.99 | 1.00 |
| 6.73_1160.5609 | 0.20 | 0.00 | 1.00 | 1.00 |
| 1.60_229.1318  | 0.21 | 0.04 | 0.91 | 1.00 |
| 5.27_685.1761  | 0.22 | 0.00 | 0.72 | 1.00 |
| 4.88_188.0708  | 0.23 | 0.39 | 0.94 | 1.00 |
| 5.61_343.2002  | 0.23 | 0.05 | 0.84 | 1.00 |
| 4.81_464.2611  | 0.24 | 0.29 | 0.94 | 1.00 |
| 3.80_194.0821  | 0.26 | 0.00 | 0.66 | 1.00 |
| 9.11_505.3321  | 0.27 | 0.00 | 0.93 | 1.00 |
| 16.22_252.0441 | 0.28 | 0.50 | 0.80 | 1.00 |
| 5.81_605.2195  | 0.28 | 0.40 | 0.77 | 1.00 |
| 16.18_335.9929 | 0.28 | 0.00 | 0.95 | 1.00 |
| 4.32_308.1712  | 0.29 | 0.11 | 0.73 | 1.00 |
| 4.26_450.2439  | 0.31 | 0.02 | 0.69 | 1.00 |
| 6.60_152.1087  | 0.31 | 0.58 | 0.95 | 1.00 |
| 6.74_1160.9454 | 0.32 | 0.26 | 1.00 | 0.79 |
| 4.63_149.1104  | 0.32 | 0.51 | 0.98 | 1.00 |
| 5.34_191.1575  | 0.32 | 0.46 | 0.91 | 1.00 |
| 4.86_372.1909  | 0.32 | 0.17 | 0.79 | 1.00 |
| 4.00_320.1711  | 0.33 | 0.04 | 0.80 | 1.00 |
| 5.16_210.1137  | 0.33 | 0.33 | 0.91 | 1.00 |
| 6.10_320.1966  | 0.33 | 0.00 | 0.70 | 1.00 |
| 1.49_365.1079  | 0.35 | 0.48 | 0.78 | 1.00 |
| 16.15_481.1090 | 0.35 | 0.00 | 0.73 | 1.00 |
| 6.15_485.2027  | 0.36 | 0.38 | 0.68 | 1.00 |
| 7.25_371.1508  | 0.36 | 0.00 | 1.00 | 0.98 |



## D. Mass Spectral Data for Selected Features

|                |      |      |      |      |
|----------------|------|------|------|------|
| 6.40_263.1761  | 0.36 | 0.38 | 0.81 | 1.00 |
| 3.85_258.1333  | 0.36 | 0.00 | 0.73 | 1.00 |
| 4.53_236.1764  | 0.37 | 0.48 | 0.94 | 1.00 |
| 7.29_331.2114  | 0.38 | 0.55 | 0.91 | 1.00 |
| 5.78_164.0706  | 0.39 | 0.52 | 1.00 | 0.96 |
| 8.22_220.1332  | 0.39 | 0.57 | 0.94 | 1.00 |
| 3.75_267.1417  | 0.40 | 0.50 | 0.78 | 1.00 |
| 9.69_220.1127  | 0.41 | 0.48 | 1.00 | 0.98 |
| 5.71_249.1598  | 0.41 | 0.57 | 0.84 | 1.00 |
| 4.40_158.0302  | 0.42 | 0.31 | 1.00 | 0.98 |
| 5.20_239.1759  | 0.42 | 0.69 | 0.98 | 1.00 |
| 4.67_270.1917  | 0.43 | 0.59 | 0.81 | 1.00 |
| 3.79_359.1699  | 0.45 | 0.22 | 0.72 | 1.00 |
| 4.34_266.1408  | 0.45 | 0.35 | 0.75 | 1.00 |
| 3.94_254.1629  | 0.45 | 0.17 | 0.91 | 1.00 |
| 4.70_221.1315  | 0.45 | 0.67 | 0.96 | 1.00 |
| 4.16_256.1718  | 0.46 | 0.62 | 0.88 | 1.00 |
| 12.73_328.1928 | 0.46 | 0.00 | 0.98 | 1.00 |
| 6.40_439.1986  | 0.47 | 0.47 | 0.81 | 1.00 |
| 8.66_655.2795  | 0.48 | 1.00 | 0.00 | 0.00 |
| 6.23_251.1781  | 0.49 | 0.54 | 0.87 | 1.00 |
| 3.93_438.1964  | 0.49 | 0.18 | 0.91 | 1.00 |
| 1.48_610.1314  | 0.50 | 0.23 | 0.82 | 1.00 |
| 10.60_346.3091 | 0.51 | 1.00 | 0.00 | 0.00 |
| 3.86_242.1126  | 0.51 | 0.56 | 0.83 | 1.00 |
| 10.40_371.3275 | 0.52 | 1.00 | 0.02 | 0.02 |
| 9.48_225.1993  | 0.53 | 1.00 | 0.02 | 0.02 |
| 1.50_401.0693  | 0.54 | 0.50 | 1.00 | 0.98 |
| 4.26_669.2631  | 0.56 | 1.00 | 0.00 | 0.08 |
| 11.80_235.1712 | 0.56 | 1.00 | 0.00 | 0.09 |
| 10.15_739.4618 | 0.56 | 1.00 | 0.11 | 0.07 |
| 5.72_240.1231  | 0.56 | 0.39 | 0.89 | 1.00 |
| 10.53_531.4000 | 0.57 | 1.00 | 0.00 | 0.00 |
| 4.37_663.2850  | 0.59 | 1.00 | 0.00 | 0.00 |
| 12.63_394.2284 | 0.59 | 0.45 | 1.00 | 0.87 |
| 6.59_273.1670  | 0.60 | 0.51 | 0.84 | 1.00 |
| 13.48_341.2200 | 0.60 | 0.66 | 1.00 | 0.86 |
| 13.98_433.3418 | 0.61 | 1.00 | 0.05 | 0.00 |
| 5.43_241.1546  | 0.61 | 0.63 | 0.93 | 1.00 |
| 4.64_412.2067  | 0.62 | 1.00 | 0.15 | 0.20 |
| 6.19_181.1351  | 0.63 | 1.00 | 0.08 | 0.10 |
| 10.97_401.2525 | 0.63 | 1.00 | 0.08 | 0.21 |
| 4.64_137.0376  | 0.64 | 0.67 | 0.83 | 1.00 |
| 3.99_164.0936  | 0.65 | 0.59 | 0.89 | 1.00 |
| 11.58_415.2745 | 0.65 | 1.00 | 0.07 | 0.02 |
| 12.62_273.1378 | 0.66 | 1.00 | 0.00 | 0.00 |
| 4.27_647.2871  | 0.67 | 1.00 | 0.09 | 0.00 |
| 11.44_223.2060 | 0.67 | 1.00 | 0.00 | 0.00 |
| 8.08_219.1411  | 0.68 | 1.00 | 0.30 | 0.24 |
| 6.85_824.9348  | 0.70 | 1.00 | 0.00 | 0.23 |
| 16.15_442.8736 | 0.71 | 1.00 | 0.00 | 0.00 |
| 7.07_184.1710  | 0.72 | 1.00 | 0.00 | 0.00 |
| 4.37_150.0945  | 0.72 | 1.00 | 0.00 | 0.00 |
| 3.89_518.1743  | 0.73 | 1.00 | 0.06 | 0.00 |
| 11.18_473.3585 | 0.75 | 1.00 | 0.08 | 0.04 |
| 12.74_443.3505 | 0.77 | 1.00 | 0.01 | 0.00 |
| 1.50_230.0720  | 0.77 | 0.58 | 1.00 | 0.98 |
| 11.97_299.2600 | 0.80 | 1.00 | 0.31 | 0.21 |
| 15.06_413.2647 | 0.81 | 1.00 | 0.42 | 0.57 |
| 11.84_443.3878 | 0.82 | 1.00 | 0.11 | 0.06 |
| 11.03_354.1608 | 0.82 | 1.00 | 0.09 | 0.25 |
| 11.28_440.3462 | 0.82 | 1.00 | 0.00 | 0.00 |
| 12.98_282.2118 | 0.82 | 1.00 | 0.15 | 0.10 |
| 5.16_237.1592  | 0.87 | 1.00 | 0.66 | 0.73 |
| 10.38_401.3397 | 0.88 | 1.00 | 0.27 | 0.16 |
| 9.26_219.1735  | 0.88 | 1.00 | 0.00 | 0.00 |
| 4.50_359.1197  | 0.89 | 1.00 | 0.00 | 0.00 |
| 15.94_338.3442 | 0.91 | 1.00 | 0.74 | 0.68 |
| 13.49_295.2258 | 0.91 | 1.00 | 0.06 | 0.00 |
| 1.47_508.0657  | 0.91 | 1.00 | 0.37 | 0.00 |

### D. Mass Spectral Data for Selected Features

|                |      |      |      |      |
|----------------|------|------|------|------|
| 4.49_225.1597  | 0.97 | 1.00 | 0.54 | 0.56 |
| 12.89_441.3208 | 0.99 | 1.00 | 0.49 | 0.58 |
| 10.36_211.6353 | 1.00 | 0.89 | 0.03 | 0.00 |
| 11.31_225.6512 | 1.00 | 0.95 | 0.00 | 0.00 |
| 9.27_240.2315  | 1.00 | 0.88 | 0.00 | 0.00 |
| 10.39_268.2627 | 1.00 | 0.83 | 0.00 | 0.00 |
| 11.44_291.1951 | 1.00 | 0.75 | 0.00 | 0.00 |
| 12.62_313.2746 | 1.00 | 0.83 | 0.12 | 0.11 |
| 14.31_325.2414 | 1.00 | 0.74 | 0.00 | 0.00 |
| 15.49_338.3442 | 1.00 | 0.86 | 0.00 | 0.00 |
| 13.48_397.3392 | 1.00 | 0.75 | 0.00 | 0.00 |
| 13.95_411.3586 | 1.00 | 0.78 | 0.06 | 0.00 |
| 13.27_419.3131 | 1.00 | 0.81 | 0.00 | 0.00 |
| 10.98_442.3651 | 1.00 | 0.78 | 0.00 | 0.29 |
| 12.97_555.3910 | 1.00 | 0.94 | 0.77 | 0.59 |
| 12.75_617.4294 | 1.00 | 0.84 | 0.36 | 0.00 |
| 13.92_641.5490 | 1.00 | 0.85 | 0.00 | 0.00 |
| 4.37_685.2548  | 1.00 | 0.86 | 0.12 | 0.23 |
| 7.00_916.3325  | 1.00 | 0.59 | 0.00 | 0.00 |

## D. Mass Spectral Data for Selected Features

**Table S20.** Normalized heat map of features described as unique in figure 2b and c when comparing wild type *Nocardiosis sp. FU40 ΔApoS8* to the S6 streptomycin resistant mutant extract using OPLS-DA and extracting features from the generated S-plot with correlation coefficients  $\geq 0.9$ . Features are normalized to maximum intensity for that feature.

| Feature ID (RT_m/z) | WT   | WT   | S6   | S6   |
|---------------------|------|------|------|------|
| 12.03_135.1163      | 0.00 | 0.04 | 0.52 | 1.00 |
| 12.03_123.1165      | 0.00 | 0.00 | 0.83 | 1.00 |
| 1.50_103.5345       | 0.00 | 0.00 | 0.90 | 1.00 |
| 12.03_149.1327      | 0.00 | 0.00 | 0.77 | 1.00 |
| 13.61_149.0907      | 0.00 | 0.00 | 1.00 | 0.65 |
| 1.50_165.0624       | 0.00 | 0.00 | 0.96 | 1.00 |
| 6.56_162.0938       | 0.00 | 0.00 | 0.91 | 1.00 |
| 4.31_160.1140       | 0.00 | 0.00 | 0.71 | 1.00 |
| 16.16_174.0876      | 0.00 | 0.00 | 0.77 | 1.00 |
| 5.78_170.1204       | 0.00 | 0.00 | 0.84 | 1.00 |
| 7.08_169.0882       | 0.00 | 0.05 | 0.72 | 1.00 |
| 6.60_180.1017       | 0.00 | 0.02 | 1.00 | 0.97 |
| 5.02_180.1014       | 0.00 | 0.00 | 0.73 | 1.00 |
| 10.70_179.1435      | 0.00 | 0.00 | 1.00 | 0.89 |
| 4.95_177.1399       | 0.00 | 0.17 | 0.64 | 1.00 |
| 4.39_192.1130       | 0.00 | 0.27 | 0.80 | 1.00 |
| 9.12_191.0134       | 0.00 | 0.00 | 0.86 | 1.00 |
| 4.14_186.1168       | 0.00 | 0.00 | 0.86 | 1.00 |
| 4.02_198.1143       | 0.00 | 0.00 | 0.97 | 1.00 |
| 9.08_196.0187       | 0.00 | 0.00 | 0.64 | 1.00 |
| 8.84_203.1804       | 0.00 | 0.00 | 0.95 | 1.00 |
| 8.12_203.1781       | 0.00 | 0.00 | 0.91 | 1.00 |
| 6.22_203.0786       | 0.00 | 0.08 | 1.00 | 0.92 |
| 9.08_203.0278       | 0.00 | 0.00 | 0.77 | 1.00 |
| 9.80_203.0277       | 0.00 | 0.00 | 0.61 | 1.00 |
| 9.42_202.0393       | 0.00 | 0.00 | 0.61 | 1.00 |
| 5.44_208.0539       | 0.00 | 0.01 | 0.91 | 1.00 |
| 7.49_207.0994       | 0.00 | 0.07 | 0.89 | 1.00 |
| 1.30_205.9283       | 0.00 | 0.00 | 0.96 | 1.00 |
| 4.84_205.1323       | 0.00 | 0.00 | 0.62 | 1.00 |
| 10.22_205.1232      | 0.00 | 0.00 | 0.61 | 1.00 |
| 8.67_212.0251       | 0.00 | 0.00 | 1.00 | 0.81 |
| 1.32_211.8786       | 0.00 | 0.00 | 0.94 | 1.00 |
| 1.49_211.0584       | 0.00 | 0.14 | 0.92 | 1.00 |
| 9.81_210.0363       | 0.00 | 0.00 | 0.60 | 1.00 |
| 5.35_210.0350       | 0.00 | 0.00 | 0.84 | 1.00 |
| 9.41_219.0312       | 0.00 | 0.00 | 0.93 | 1.00 |
| 10.24_222.1533      | 0.00 | 0.14 | 1.00 | 0.98 |
| 8.84_221.1903       | 0.00 | 0.00 | 1.00 | 0.94 |
| 6.51_220.1710       | 0.00 | 0.04 | 1.00 | 0.60 |
| 8.67_226.0395       | 0.00 | 0.00 | 1.00 | 0.94 |
| 7.99_225.1125       | 0.00 | 0.09 | 0.76 | 1.00 |
| 9.04_225.0298       | 0.00 | 0.02 | 0.56 | 1.00 |
| 9.77_224.0325       | 0.00 | 0.00 | 0.95 | 1.00 |
| 5.48_229.0656       | 0.00 | 0.00 | 0.95 | 1.00 |
| 9.82_230.0718       | 0.00 | 0.05 | 1.00 | 0.75 |
| 5.11_236.1306       | 0.00 | 0.11 | 0.76 | 1.00 |
| 9.80_241.0261       | 0.00 | 0.00 | 1.00 | 0.83 |
| 8.82_241.0249       | 0.00 | 0.00 | 0.97 | 1.00 |
| 5.04_244.1219       | 0.00 | 0.00 | 0.71 | 1.00 |
| 11.26_250.1814      | 0.00 | 0.00 | 1.00 | 0.69 |
| 8.08_252.0397       | 0.00 | 0.00 | 1.00 | 0.69 |
| 9.63_252.0395       | 0.00 | 0.00 | 0.48 | 1.00 |
| 6.01_252.0391       | 0.00 | 0.00 | 0.79 | 1.00 |
| 5.12_252.0389       | 0.00 | 0.00 | 1.00 | 0.84 |
| 7.48_252.0388       | 0.00 | 0.00 | 0.62 | 1.00 |
| 3.87_257.1146       | 0.00 | 0.30 | 0.82 | 1.00 |
| 12.02_263.1978      | 0.00 | 0.03 | 0.77 | 1.00 |
| 1.78_262.1278       | 0.00 | 0.00 | 0.86 | 1.00 |
| 5.86_262.1048       | 0.00 | 0.22 | 0.90 | 1.00 |
| 10.71_261.1779      | 0.00 | 0.00 | 0.71 | 1.00 |
| 5.01_261.1438       | 0.00 | 0.12 | 0.78 | 1.00 |
| 10.77_267.1616      | 0.00 | 0.21 | 0.58 | 1.00 |
| 5.18_266.1406       | 0.00 | 0.18 | 0.78 | 1.00 |

## D. Mass Spectral Data for Selected Features

|                |      |      |      |      |
|----------------|------|------|------|------|
| 5.27_264.2082  | 0.00 | 0.00 | 1.00 | 0.78 |
| 7.18_278.2110  | 0.00 | 0.00 | 0.83 | 1.00 |
| 6.07_276.1943  | 0.00 | 0.00 | 0.83 | 1.00 |
| 12.79_284.1681 | 0.00 | 0.20 | 0.88 | 1.00 |
| 7.50_283.1523  | 0.00 | 0.05 | 1.00 | 0.82 |
| 1.73_282.0649  | 0.00 | 0.01 | 0.63 | 1.00 |
| 7.82_294.2085  | 0.00 | 0.00 | 1.00 | 1.00 |
| 4.87_293.1612  | 0.00 | 0.21 | 0.98 | 1.00 |
| 6.49_292.1923  | 0.00 | 0.03 | 1.00 | 0.96 |
| 4.74_298.0969  | 0.00 | 0.07 | 1.00 | 0.84 |
| 9.60_297.1694  | 0.00 | 0.05 | 0.66 | 1.00 |
| 7.19_296.2224  | 0.00 | 0.00 | 0.94 | 1.00 |
| 3.78_300.1386  | 0.00 | 0.10 | 0.69 | 1.00 |
| 12.02_309.1921 | 0.00 | 0.01 | 0.99 | 1.00 |
| 6.00_308.2238  | 0.00 | 0.00 | 0.80 | 1.00 |
| 6.06_312.2197  | 0.00 | 0.00 | 1.00 | 0.91 |
| 6.84_312.2197  | 0.00 | 0.00 | 0.91 | 1.00 |
| 7.24_312.2197  | 0.00 | 0.00 | 1.00 | 0.78 |
| 5.82_322.1007  | 0.00 | 0.00 | 1.00 | 0.98 |
| 6.92_318.2094  | 0.00 | 0.00 | 1.00 | 0.76 |
| 7.34_326.2353  | 0.00 | 0.00 | 1.00 | 0.82 |
| 6.01_326.2353  | 0.00 | 0.00 | 0.80 | 1.00 |
| 12.03_325.1706 | 0.00 | 0.00 | 0.78 | 1.00 |
| 8.76_329.1942  | 0.00 | 0.06 | 0.98 | 1.00 |
| 5.84_341.1007  | 0.00 | 0.00 | 1.00 | 0.70 |
| 5.19_344.6196  | 0.00 | 0.18 | 0.77 | 1.00 |
| 7.37_344.2218  | 0.00 | 0.00 | 0.98 | 1.00 |
| 5.26_354.0787  | 0.00 | 0.13 | 1.00 | 0.83 |
| 8.24_352.2057  | 0.00 | 0.00 | 0.91 | 1.00 |
| 4.01_351.5992  | 0.00 | 0.00 | 1.00 | 1.00 |
| 6.67_362.2335  | 0.00 | 0.00 | 0.67 | 1.00 |
| 6.51_360.2165  | 0.00 | 0.00 | 1.00 | 0.75 |
| 9.80_367.0822  | 0.00 | 0.00 | 0.61 | 1.00 |
| 9.80_387.0731  | 0.00 | 0.00 | 0.64 | 1.00 |
| 6.88_386.2329  | 0.00 | 0.01 | 1.00 | 0.82 |
| 6.89_384.2172  | 0.00 | 0.00 | 0.57 | 1.00 |
| 6.24_384.2171  | 0.00 | 0.00 | 0.92 | 1.00 |
| 8.63_398.2317  | 0.00 | 0.00 | 0.87 | 1.00 |
| 1.49_394.1142  | 0.00 | 0.00 | 0.83 | 1.00 |
| 3.74_416.1928  | 0.00 | 0.07 | 0.72 | 1.00 |
| 9.08_429.0845  | 0.00 | 0.00 | 1.00 | 0.92 |
| 4.02_423.1940  | 0.00 | 0.00 | 0.55 | 1.00 |
| 9.07_451.0615  | 0.00 | 0.00 | 0.78 | 1.00 |
| 6.99_443.3240  | 0.00 | 0.15 | 1.00 | 0.61 |
| 9.73_443.1014  | 0.00 | 0.00 | 1.00 | 0.99 |
| 8.80_443.0945  | 0.00 | 0.00 | 0.95 | 1.00 |
| 10.02_459.0960 | 0.00 | 0.00 | 1.00 | 0.93 |
| 9.03_457.1145  | 0.00 | 0.01 | 1.00 | 0.98 |
| 6.21_455.1906  | 0.00 | 0.10 | 0.95 | 1.00 |
| 9.81_454.0847  | 0.00 | 0.00 | 0.80 | 1.00 |
| 9.05_454.0819  | 0.00 | 0.00 | 1.00 | 0.98 |
| 6.46_471.2466  | 0.00 | 0.01 | 0.76 | 1.00 |
| 8.82_465.0807  | 0.00 | 0.00 | 0.84 | 1.00 |
| 9.79_462.0710  | 0.00 | 0.00 | 0.68 | 1.00 |
| 9.04_462.0699  | 0.00 | 0.00 | 0.59 | 1.00 |
| 9.78_481.0499  | 0.00 | 0.00 | 0.87 | 1.00 |
| 9.02_479.0963  | 0.00 | 0.00 | 0.79 | 1.00 |
| 7.37_478.2069  | 0.00 | 0.12 | 0.69 | 1.00 |
| 4.15_476.2404  | 0.00 | 0.00 | 1.00 | 0.96 |
| 7.51_499.2782  | 0.00 | 0.05 | 1.00 | 0.83 |
| 8.58_490.2972  | 0.00 | 0.00 | 1.00 | 0.76 |
| 9.79_513.1525  | 0.00 | 0.00 | 0.79 | 1.00 |
| 5.64_515.2738  | 0.00 | 0.01 | 0.57 | 1.00 |
| 6.62_515.2737  | 0.00 | 0.00 | 1.00 | 0.61 |
| 1.76_515.1445  | 0.00 | 0.00 | 0.60 | 1.00 |
| 7.21_526.2839  | 0.00 | 0.02 | 1.00 | 0.95 |
| 7.20_544.2918  | 0.00 | 0.00 | 1.00 | 0.68 |
| 6.63_570.3104  | 0.00 | 0.00 | 0.95 | 1.00 |
| 12.03_565.3746 | 0.00 | 0.00 | 0.96 | 1.00 |
| 9.67_563.3802  | 0.00 | 0.00 | 0.86 | 1.00 |

## D. Mass Spectral Data for Selected Features

|                |      |      |      |      |
|----------------|------|------|------|------|
| 6.90_555.3068  | 0.00 | 0.00 | 0.84 | 1.00 |
| 1.72_551.1035  | 0.00 | 0.00 | 0.72 | 1.00 |
| 12.03_549.4012 | 0.00 | 0.00 | 1.00 | 0.86 |
| 9.02_590.6205  | 0.00 | 0.00 | 0.87 | 1.00 |
| 9.79_576.6021  | 0.00 | 0.00 | 0.77 | 1.00 |
| 1.25_639.8836  | 0.00 | 0.00 | 0.63 | 1.00 |
| 12.72_634.4531 | 0.00 | 0.00 | 1.00 | 0.53 |
| 9.79_683.1204  | 0.00 | 0.00 | 0.84 | 1.00 |
| 7.20_920.0962  | 0.00 | 0.00 | 1.00 | 0.83 |
| 9.80_907.1678  | 0.00 | 0.00 | 1.00 | 1.00 |
| 7.01_1221.4414 | 0.00 | 0.00 | 0.91 | 1.00 |
| 9.79_218.0234  | 0.00 | 0.01 | 0.64 | 1.00 |
| 8.34_150.0928  | 0.00 | 0.03 | 0.85 | 1.00 |
| 9.78_465.0808  | 0.00 | 0.01 | 0.78 | 1.00 |
| 9.81_269.0437  | 0.00 | 0.00 | 0.57 | 1.00 |
| 6.76_310.2021  | 0.00 | 0.00 | 0.99 | 1.00 |
| 6.24_515.2753  | 0.01 | 0.00 | 1.00 | 0.78 |
| 8.10_301.1534  | 0.01 | 0.03 | 1.00 | 0.92 |
| 5.66_384.2168  | 0.01 | 0.00 | 0.95 | 1.00 |
| 1.29_203.9309  | 0.01 | 0.00 | 0.99 | 1.00 |
| 7.48_177.0877  | 0.01 | 0.00 | 0.81 | 1.00 |
| 8.74_542.3146  | 0.01 | 0.00 | 1.00 | 0.77 |
| 12.02_205.1953 | 0.01 | 0.00 | 0.89 | 1.00 |
| 3.22_235.1201  | 0.02 | 0.00 | 0.59 | 1.00 |
| 6.65_282.2073  | 0.02 | 0.11 | 1.00 | 0.97 |
| 16.15_710.1773 | 0.02 | 0.01 | 1.00 | 0.63 |
| 5.43_377.1482  | 0.02 | 0.00 | 0.85 | 1.00 |
| 8.54_447.2904  | 0.02 | 0.21 | 1.00 | 1.00 |
| 1.74_150.0789  | 0.03 | 0.00 | 0.69 | 1.00 |
| 8.53_177.0880  | 0.03 | 0.03 | 0.81 | 1.00 |
| 4.75_136.0625  | 0.03 | 0.00 | 0.83 | 1.00 |
| 8.53_283.1523  | 0.03 | 0.07 | 1.00 | 0.92 |
| 6.95_218.1203  | 0.03 | 0.07 | 0.71 | 1.00 |
| 8.53_207.1002  | 0.04 | 0.04 | 0.97 | 1.00 |
| 9.79_1349.2480 | 0.04 | 0.00 | 0.82 | 1.00 |
| 7.06_325.1861  | 0.04 | 0.21 | 1.00 | 0.95 |
| 1.73_338.0231  | 0.04 | 0.00 | 1.00 | 0.98 |
| 3.86_150.0940  | 0.04 | 0.08 | 0.83 | 1.00 |
| 10.52_673.3745 | 0.05 | 0.08 | 0.97 | 1.00 |
| 3.07_230.1126  | 0.06 | 0.14 | 1.00 | 0.79 |
| 1.70_260.1135  | 0.06 | 0.00 | 0.83 | 1.00 |
| 1.82_228.1004  | 0.06 | 0.01 | 0.92 | 1.00 |
| 10.18_223.2085 | 0.06 | 0.39 | 1.00 | 0.81 |
| 1.53_143.0837  | 0.07 | 0.09 | 0.75 | 1.00 |
| 7.42_196.0651  | 0.07 | 0.04 | 0.55 | 1.00 |
| 4.82_393.2208  | 0.07 | 0.00 | 1.00 | 0.93 |
| 6.66_264.1980  | 0.08 | 0.03 | 0.99 | 1.00 |
| 6.41_165.0905  | 0.08 | 0.06 | 0.80 | 1.00 |
| 7.42_280.1237  | 0.09 | 0.26 | 1.00 | 0.96 |
| 4.87_329.1844  | 0.10 | 0.00 | 0.91 | 1.00 |
| 5.27_685.1761  | 0.10 | 0.00 | 0.77 | 1.00 |
| 6.78_176.0714  | 0.11 | 0.18 | 0.79 | 1.00 |
| 7.06_221.1900  | 0.11 | 0.34 | 0.90 | 1.00 |
| 7.89_192.1015  | 0.11 | 0.20 | 0.74 | 1.00 |
| 5.97_286.6247  | 0.12 | 0.02 | 0.83 | 1.00 |
| 4.30_310.1305  | 0.12 | 0.03 | 0.95 | 1.00 |
| 7.06_203.1787  | 0.12 | 0.23 | 0.87 | 1.00 |
| 5.97_278.6345  | 0.12 | 0.03 | 0.61 | 1.00 |
| 6.06_203.1781  | 0.13 | 0.22 | 0.92 | 1.00 |
| 1.77_218.1042  | 0.13 | 0.03 | 0.92 | 1.00 |
| 9.47_211.0868  | 0.13 | 0.23 | 0.78 | 1.00 |
| 16.18_335.9929 | 0.14 | 0.00 | 1.00 | 0.75 |
| 5.81_605.2195  | 0.14 | 0.20 | 0.97 | 1.00 |
| 3.82_230.1126  | 0.16 | 0.10 | 1.00 | 0.92 |
| 4.63_149.1104  | 0.21 | 0.35 | 0.81 | 1.00 |
| 4.88_188.0708  | 0.22 | 0.37 | 1.00 | 1.00 |
| 7.29_331.2114  | 0.22 | 0.32 | 0.81 | 1.00 |
| 4.31_265.0552  | 0.22 | 0.00 | 0.66 | 1.00 |
| 1.60_229.1318  | 0.23 | 0.05 | 0.90 | 1.00 |
| 8.29_401.1993  | 0.24 | 0.00 | 0.86 | 1.00 |

## D. Mass Spectral Data for Selected Features

|                |      |      |      |      |
|----------------|------|------|------|------|
| 1.73_288.1454  | 0.24 | 0.00 | 1.00 | 0.94 |
| 5.81_222.1598  | 0.25 | 0.48 | 0.91 | 1.00 |
| 6.60_152.1087  | 0.26 | 0.47 | 0.83 | 1.00 |
| 4.64_137.0376  | 0.26 | 0.27 | 0.75 | 1.00 |
| 16.15_365.1085 | 0.28 | 0.00 | 1.00 | 0.86 |
| 6.15_485.2027  | 0.29 | 0.31 | 0.98 | 1.00 |
| 4.77_179.0472  | 0.29 | 0.54 | 0.96 | 1.00 |
| 6.34_150.0787  | 0.31 | 0.29 | 0.81 | 1.00 |
| 4.34_266.1408  | 0.31 | 0.24 | 0.72 | 1.00 |
| 16.18_204.8884 | 0.32 | 0.00 | 1.00 | 0.98 |
| 8.22_220.1332  | 0.33 | 0.49 | 0.84 | 1.00 |
| 5.78_164.0706  | 0.34 | 0.46 | 0.95 | 1.00 |
| 6.62_297.1617  | 0.34 | 0.61 | 0.90 | 1.00 |
| 5.71_249.1598  | 0.35 | 0.49 | 0.88 | 1.00 |
| 4.40_158.0302  | 0.36 | 0.26 | 0.83 | 1.00 |
| 4.70_268.1679  | 0.36 | 0.65 | 1.00 | 0.99 |
| 3.80_288.1929  | 0.37 | 0.32 | 1.00 | 0.77 |
| 4.67_270.1917  | 0.38 | 0.52 | 0.97 | 1.00 |
| 4.16_256.1718  | 0.38 | 0.51 | 0.99 | 1.00 |
| 4.00_320.1711  | 0.38 | 0.04 | 1.00 | 0.73 |
| 3.94_254.1629  | 0.39 | 0.15 | 1.00 | 0.94 |
| 6.34_469.2088  | 0.39 | 0.51 | 1.00 | 0.92 |
| 5.16_210.1137  | 0.41 | 0.40 | 0.80 | 1.00 |
| 16.17_188.9130 | 0.42 | 0.00 | 1.00 | 1.00 |
| 6.23_251.1781  | 0.42 | 0.46 | 0.81 | 1.00 |
| 6.40_263.1761  | 0.43 | 0.46 | 0.91 | 1.00 |
| 3.75_267.1417  | 0.44 | 0.55 | 0.98 | 1.00 |
| 6.10_320.1966  | 0.44 | 0.00 | 0.94 | 1.00 |
| 3.82_209.1275  | 0.44 | 0.40 | 0.78 | 1.00 |
| 4.66_304.1776  | 0.45 | 0.67 | 1.00 | 0.97 |
| 6.40_439.1986  | 0.46 | 0.46 | 1.00 | 1.00 |
| 11.27_448.3444 | 0.48 | 1.00 | 0.00 | 0.00 |
| 12.43_386.2820 | 0.50 | 1.00 | 0.00 | 0.00 |
| 3.75_245.1607  | 0.50 | 0.67 | 1.00 | 0.91 |
| 16.14_274.0340 | 0.51 | 0.36 | 1.00 | 0.77 |
| 10.60_346.3091 | 0.51 | 1.00 | 0.00 | 0.00 |
| 10.40_371.3275 | 0.52 | 1.00 | 0.00 | 0.00 |
| 10.70_288.2557 | 0.52 | 1.00 | 0.00 | 0.00 |
| 3.86_242.1126  | 0.52 | 0.57 | 0.82 | 1.00 |
| 9.48_225.1993  | 0.53 | 1.00 | 0.00 | 0.02 |
| 3.94_180.0961  | 0.54 | 0.24 | 0.90 | 1.00 |
| 6.74_1160.9454 | 0.54 | 0.45 | 0.89 | 1.00 |
| 3.79_359.1699  | 0.55 | 0.27 | 0.90 | 1.00 |
| 13.53_339.2529 | 0.55 | 1.00 | 0.00 | 0.00 |
| 7.22_541.3491  | 0.56 | 1.00 | 0.00 | 0.10 |
| 4.26_669.2631  | 0.56 | 1.00 | 0.00 | 0.00 |
| 11.80_235.1712 | 0.56 | 1.00 | 0.06 | 0.07 |
| 10.15_739.4618 | 0.56 | 1.00 | 0.08 | 0.07 |
| 14.41_309.2409 | 0.56 | 1.00 | 0.22 | 0.09 |
| 5.95_273.1788  | 0.56 | 1.00 | 0.23 | 0.00 |
| 10.53_531.4000 | 0.57 | 1.00 | 0.00 | 0.00 |
| 4.59_251.1399  | 0.57 | 0.57 | 0.85 | 1.00 |
| 12.97_407.3144 | 0.58 | 1.00 | 0.24 | 0.02 |
| 5.72_240.1231  | 0.58 | 0.40 | 0.95 | 1.00 |
| 6.02_274.1066  | 0.58 | 0.40 | 0.86 | 1.00 |
| 12.98_399.3242 | 0.58 | 1.00 | 0.22 | 0.02 |
| 4.37_663.2850  | 0.59 | 1.00 | 0.00 | 0.00 |
| 13.98_433.3418 | 0.61 | 1.00 | 0.04 | 0.00 |
| 6.90_166.0720  | 0.61 | 1.00 | 0.00 | 0.00 |
| 5.20_239.1759  | 0.62 | 1.00 | 0.25 | 0.31 |
| 9.69_220.1127  | 0.62 | 0.72 | 0.88 | 1.00 |
| 4.64_412.2067  | 0.62 | 1.00 | 0.07 | 0.20 |
| 6.19_181.1351  | 0.63 | 1.00 | 0.06 | 0.11 |
| 10.97_401.2525 | 0.63 | 1.00 | 0.00 | 0.09 |
| 11.58_415.2745 | 0.65 | 1.00 | 0.00 | 0.03 |
| 12.62_273.1378 | 0.66 | 1.00 | 0.00 | 0.00 |
| 4.27_647.2871  | 0.67 | 1.00 | 0.00 | 0.07 |
| 1.50_448.0831  | 0.67 | 1.00 | 0.19 | 0.00 |
| 11.44_223.2060 | 0.67 | 1.00 | 0.00 | 0.00 |
| 1.50_423.1007  | 0.67 | 1.00 | 0.00 | 0.20 |

## D. Mass Spectral Data for Selected Features

|                |      |      |      |      |
|----------------|------|------|------|------|
| 8.08_219.1411  | 0.68 | 1.00 | 0.00 | 0.00 |
| 4.81_415.2090  | 0.69 | 0.48 | 0.91 | 1.00 |
| 16.15_442.8736 | 0.71 | 1.00 | 0.00 | 0.00 |
| 7.07_184.1710  | 0.72 | 1.00 | 0.00 | 0.00 |
| 4.37_150.0945  | 0.72 | 1.00 | 0.00 | 0.00 |
| 3.89_518.1743  | 0.73 | 1.00 | 0.00 | 0.02 |
| 11.18_473.3585 | 0.75 | 1.00 | 0.04 | 0.02 |
| 12.86_463.2998 | 0.77 | 1.00 | 0.31 | 0.33 |
| 12.74_443.3505 | 0.77 | 1.00 | 0.00 | 0.00 |
| 12.97_547.4060 | 0.77 | 1.00 | 0.46 | 0.06 |
| 13.86_425.2896 | 0.78 | 1.00 | 0.55 | 0.40 |
| 11.97_299.2600 | 0.80 | 1.00 | 0.05 | 0.00 |
| 15.06_413.2647 | 0.81 | 1.00 | 0.53 | 0.42 |
| 11.84_443.3878 | 0.82 | 1.00 | 0.14 | 0.07 |
| 11.03_354.1608 | 0.82 | 1.00 | 0.06 | 0.05 |
| 11.28_440.3462 | 0.82 | 1.00 | 0.00 | 0.00 |
| 12.98_282.2118 | 0.82 | 1.00 | 0.00 | 0.00 |
| 13.79_365.2675 | 0.84 | 1.00 | 0.00 | 0.00 |
| 4.81_464.2611  | 0.84 | 1.00 | 0.48 | 0.21 |
| 12.83_546.4021 | 0.86 | 1.00 | 0.71 | 0.59 |
| 10.38_401.3397 | 0.88 | 1.00 | 0.41 | 0.26 |
| 9.26_219.1735  | 0.88 | 1.00 | 0.00 | 0.00 |
| 10.84_227.1557 | 0.90 | 1.00 | 0.62 | 0.43 |
| 15.94_338.3442 | 0.91 | 1.00 | 0.58 | 0.52 |
| 13.49_295.2258 | 0.91 | 1.00 | 0.05 | 0.01 |
| 1.47_508.0657  | 0.91 | 1.00 | 0.53 | 0.67 |
| 1.50_260.0296  | 0.92 | 1.00 | 0.28 | 0.12 |
| 12.73_320.2010 | 0.94 | 1.00 | 0.00 | 0.37 |
| 4.49_225.1597  | 0.97 | 1.00 | 0.22 | 0.24 |
| 5.43_241.1546  | 0.98 | 1.00 | 0.00 | 0.00 |
| 12.89_441.3208 | 0.99 | 1.00 | 0.65 | 0.48 |
| 3.99_164.0936  | 1.00 | 0.90 | 0.67 | 0.59 |
| 1.64_174.0879  | 1.00 | 0.59 | 0.00 | 0.00 |
| 5.94_213.1018  | 1.00 | 0.76 | 0.00 | 0.00 |
| 10.36_211.6353 | 1.00 | 0.89 | 0.00 | 0.00 |
| 11.31_225.6512 | 1.00 | 0.95 | 0.03 | 0.00 |
| 9.27_240.2315  | 1.00 | 0.88 | 0.00 | 0.30 |
| 10.39_268.2627 | 1.00 | 0.83 | 0.00 | 0.00 |
| 11.44_291.1951 | 1.00 | 0.75 | 0.00 | 0.00 |
| 11.33_299.2599 | 1.00 | 0.77 | 0.00 | 0.00 |
| 12.62_313.2746 | 1.00 | 0.83 | 0.00 | 0.00 |
| 14.31_325.2414 | 1.00 | 0.74 | 0.00 | 0.24 |
| 4.25_343.1235  | 1.00 | 0.70 | 0.00 | 0.00 |
| 15.49_338.3442 | 1.00 | 0.86 | 0.00 | 0.00 |
| 13.48_397.3392 | 1.00 | 0.75 | 0.03 | 0.00 |
| 13.95_411.3586 | 1.00 | 0.78 | 0.06 | 0.00 |
| 13.27_419.3131 | 1.00 | 0.81 | 0.00 | 0.00 |
| 10.77_434.3251 | 1.00 | 0.58 | 0.00 | 0.00 |
| 12.86_485.3471 | 1.00 | 0.86 | 0.57 | 0.49 |
| 1.61_539.0459  | 1.00 | 0.57 | 0.00 | 0.00 |
| 13.92_641.5490 | 1.00 | 0.85 | 0.00 | 0.00 |
| 4.37_685.2548  | 1.00 | 0.86 | 0.00 | 0.00 |
| 7.66_916.7249  | 1.00 | 0.76 | 0.00 | 0.25 |



## D. Mass Spectral Data for Selected Features

**Table S21.** Normalized heat map of features described as unique in figure 2a when comparing wild type *Nocardiosis sp. FU40*  $\Delta$ ApoS8 and S5 streptomycin resistant mutant to the R4 rifampicin resistant mutant extract using OPLS-DA and extracting features from the generated S-plot with correlation coefficients  $\geq 0.9$ . Features are normalized to maximum intensity for that feature.

| Feature ID (RT_m/z) | WT   | WT   | R4   | R4   | S5   | S5   |
|---------------------|------|------|------|------|------|------|
| 1.51_137.5554       | 0.00 | 0.00 | 1.00 | 0.52 | 0.00 | 0.00 |
| 1.52_129.5659       | 0.00 | 0.00 | 1.00 | 0.52 | 0.00 | 0.00 |
| 4.95_114.0908       | 0.00 | 0.00 | 0.45 | 1.00 | 0.12 | 0.13 |
| 4.31_160.1140       | 0.00 | 0.00 | 0.67 | 1.00 | 0.00 | 0.00 |
| 9.08_196.0187       | 0.00 | 0.00 | 0.79 | 1.00 | 0.00 | 0.00 |
| 8.68_204.0325       | 0.00 | 0.00 | 0.72 | 1.00 | 0.00 | 0.00 |
| 9.08_203.0278       | 0.00 | 0.00 | 0.76 | 1.00 | 0.00 | 0.05 |
| 9.42_202.0393       | 0.00 | 0.00 | 0.68 | 1.00 | 0.00 | 0.00 |
| 1.42_201.0074       | 0.00 | 0.00 | 0.79 | 1.00 | 0.00 | 0.00 |
| 4.54_208.1355       | 0.00 | 0.00 | 0.90 | 1.00 | 0.02 | 0.00 |
| 8.67_212.0251       | 0.00 | 0.00 | 0.63 | 1.00 | 0.00 | 0.01 |
| 9.25_211.0284       | 0.00 | 0.01 | 1.00 | 0.92 | 0.00 | 0.00 |
| 8.31_210.0369       | 0.00 | 0.00 | 0.81 | 1.00 | 0.00 | 0.00 |
| 9.81_210.0363       | 0.00 | 0.00 | 1.00 | 0.66 | 0.23 | 0.15 |
| 9.07_210.0305       | 0.00 | 0.00 | 0.77 | 1.00 | 0.00 | 0.00 |
| 9.41_219.0312       | 0.00 | 0.00 | 1.00 | 0.86 | 0.04 | 0.03 |
| 8.67_218.0490       | 0.00 | 0.00 | 0.82 | 1.00 | 0.00 | 0.00 |
| 9.03_217.0413       | 0.00 | 0.00 | 0.70 | 1.00 | 0.05 | 0.02 |
| 2.51_216.0981       | 0.00 | 0.02 | 0.49 | 1.00 | 0.05 | 0.08 |
| 16.16_223.9875      | 0.00 | 0.00 | 0.90 | 1.00 | 0.00 | 0.00 |
| 6.51_220.1710       | 0.00 | 0.04 | 1.00 | 0.99 | 0.00 | 0.00 |
| 4.58_226.1445       | 0.00 | 0.00 | 1.00 | 0.82 | 0.00 | 0.00 |
| 5.11_226.1427       | 0.00 | 0.02 | 0.53 | 1.00 | 0.00 | 0.00 |
| 8.67_226.0395       | 0.00 | 0.00 | 0.61 | 1.00 | 0.15 | 0.00 |
| 9.04_225.0298       | 0.00 | 0.01 | 0.74 | 1.00 | 0.04 | 0.00 |
| 9.77_224.0325       | 0.00 | 0.00 | 0.63 | 1.00 | 0.32 | 0.09 |
| 5.11_227.1386       | 0.00 | 0.00 | 0.56 | 1.00 | 0.00 | 0.00 |
| 9.19_230.0719       | 0.00 | 0.00 | 1.00 | 0.54 | 0.00 | 0.00 |
| 9.82_230.0718       | 0.00 | 0.03 | 0.91 | 1.00 | 0.16 | 0.50 |
| 4.89_235.1441       | 0.00 | 0.00 | 0.93 | 1.00 | 0.00 | 0.00 |
| 9.80_241.0261       | 0.00 | 0.00 | 1.00 | 0.78 | 0.00 | 0.09 |
| 8.82_241.0249       | 0.00 | 0.00 | 1.00 | 0.94 | 0.00 | 0.00 |
| 9.03_248.0351       | 0.00 | 0.00 | 0.80 | 1.00 | 0.00 | 0.00 |
| 4.04_247.1287       | 0.00 | 0.00 | 0.50 | 1.00 | 0.00 | 0.05 |
| 9.07_246.5440       | 0.00 | 0.00 | 0.71 | 1.00 | 0.03 | 0.01 |
| 5.63_245.1880       | 0.00 | 0.00 | 1.00 | 0.83 | 0.00 | 0.00 |
| 5.04_244.1219       | 0.00 | 0.00 | 0.85 | 1.00 | 0.13 | 0.00 |
| 4.70_243.1326       | 0.00 | 0.00 | 0.55 | 1.00 | 0.00 | 0.10 |
| 8.52_250.0297       | 0.00 | 0.00 | 0.76 | 1.00 | 0.00 | 0.00 |
| 9.81_253.5524       | 0.00 | 0.02 | 0.91 | 1.00 | 0.13 | 0.07 |
| 9.91_261.5430       | 0.00 | 0.00 | 1.00 | 0.65 | 0.00 | 0.00 |
| 9.03_260.5527       | 0.00 | 0.00 | 0.72 | 1.00 | 0.05 | 0.04 |
| 10.77_267.1616      | 0.00 | 0.02 | 1.00 | 1.00 | 0.31 | 0.32 |
| 9.67_268.0195       | 0.00 | 0.00 | 1.00 | 0.94 | 0.49 | 0.00 |
| 7.18_278.2110       | 0.00 | 0.00 | 0.62 | 1.00 | 0.05 | 0.06 |
| 6.07_276.1943       | 0.00 | 0.00 | 0.57 | 1.00 | 0.19 | 0.14 |
| 5.71_286.2118       | 0.00 | 0.00 | 0.84 | 1.00 | 0.08 | 0.32 |
| 7.19_284.2219       | 0.00 | 0.00 | 0.63 | 1.00 | 0.00 | 0.08 |
| 5.22_295.1312       | 0.00 | 0.05 | 0.70 | 1.00 | 0.10 | 0.00 |
| 7.48_294.2085       | 0.00 | 0.00 | 1.00 | 0.58 | 0.00 | 0.03 |
| 7.82_294.2085       | 0.00 | 0.00 | 0.56 | 1.00 | 0.00 | 0.08 |
| 6.82_294.2084       | 0.00 | 0.00 | 0.63 | 1.00 | 0.18 | 0.00 |
| 7.73_298.2024       | 0.00 | 0.00 | 0.60 | 1.00 | 0.09 | 0.10 |
| 7.19_296.2224       | 0.00 | 0.00 | 0.58 | 1.00 | 0.05 | 0.06 |
| 6.00_308.2238       | 0.00 | 0.00 | 0.64 | 1.00 | 0.07 | 0.04 |
| 6.92_313.1550       | 0.00 | 0.00 | 0.55 | 1.00 | 0.09 | 0.00 |
| 6.06_312.2197       | 0.00 | 0.00 | 0.84 | 1.00 | 0.10 | 0.09 |
| 6.84_312.2197       | 0.00 | 0.00 | 0.52 | 1.00 | 0.06 | 0.00 |
| 9.79_311.0549       | 0.00 | 0.00 | 0.57 | 1.00 | 0.00 | 0.22 |
| 3.86_320.0995       | 0.00 | 0.00 | 0.64 | 1.00 | 0.00 | 0.01 |
| 6.92_318.2094       | 0.00 | 0.00 | 0.76 | 1.00 | 0.11 | 0.10 |
| 5.91_328.5999       | 0.00 | 0.00 | 0.65 | 1.00 | 0.06 | 0.00 |



### D. Mass Spectral Data for Selected Features

|                |      |      |      |      |      |      |
|----------------|------|------|------|------|------|------|
| 7.34_326.2353  | 0.00 | 0.00 | 0.58 | 1.00 | 0.03 | 0.06 |
| 6.01_326.2353  | 0.00 | 0.00 | 0.79 | 1.00 | 0.12 | 0.03 |
| 4.97_326.0999  | 0.00 | 0.23 | 0.83 | 1.00 | 0.00 | 0.00 |
| 6.08_324.1828  | 0.00 | 0.09 | 0.64 | 1.00 | 0.08 | 0.21 |
| 6.62_334.2005  | 0.00 | 0.00 | 0.50 | 1.00 | 0.00 | 0.00 |
| 5.84_341.1007  | 0.00 | 0.00 | 0.59 | 1.00 | 0.00 | 0.00 |
| 6.22_346.2031  | 0.00 | 0.00 | 1.00 | 0.86 | 0.26 | 0.27 |
| 7.37_344.2218  | 0.00 | 0.00 | 0.66 | 1.00 | 0.03 | 0.04 |
| 8.24_352.2057  | 0.00 | 0.00 | 0.54 | 1.00 | 0.07 | 0.00 |
| 6.67_362.2335  | 0.00 | 0.00 | 1.00 | 0.86 | 0.07 | 0.05 |
| 6.51_360.2165  | 0.00 | 0.00 | 1.00 | 0.81 | 0.20 | 0.21 |
| 8.77_368.2219  | 0.00 | 0.00 | 0.73 | 1.00 | 0.09 | 0.00 |
| 6.02_368.2219  | 0.00 | 0.04 | 0.72 | 1.00 | 0.00 | 0.00 |
| 9.80_367.0822  | 0.00 | 0.00 | 0.66 | 1.00 | 0.13 | 0.13 |
| 5.64_366.2063  | 0.00 | 0.00 | 0.71 | 1.00 | 0.00 | 0.00 |
| 8.47_382.2398  | 0.00 | 0.00 | 0.89 | 1.00 | 0.05 | 0.00 |
| 7.30_389.1593  | 0.00 | 0.00 | 1.00 | 0.89 | 0.16 | 0.00 |
| 9.80_387.0731  | 0.00 | 0.00 | 0.56 | 1.00 | 0.08 | 0.13 |
| 6.88_386.2329  | 0.00 | 0.00 | 0.66 | 1.00 | 0.11 | 0.00 |
| 8.63_398.2317  | 0.00 | 0.00 | 0.65 | 1.00 | 0.00 | 0.00 |
| 9.40_418.0851  | 0.00 | 0.00 | 0.59 | 1.00 | 0.00 | 0.00 |
| 8.66_429.0854  | 0.00 | 0.00 | 0.56 | 1.00 | 0.00 | 0.00 |
| 9.08_429.0845  | 0.00 | 0.00 | 0.57 | 1.00 | 0.02 | 0.02 |
| 9.15_440.0708  | 0.00 | 0.00 | 0.59 | 1.00 | 0.00 | 0.00 |
| 9.42_432.0873  | 0.00 | 0.00 | 0.65 | 1.00 | 0.00 | 0.00 |
| 9.09_448.0576  | 0.00 | 0.00 | 0.61 | 1.00 | 0.00 | 0.00 |
| 9.73_443.1014  | 0.00 | 0.00 | 0.82 | 1.00 | 0.06 | 0.06 |
| 8.33_443.0954  | 0.00 | 0.00 | 0.93 | 1.00 | 0.03 | 0.00 |
| 8.80_443.0945  | 0.00 | 0.00 | 0.61 | 1.00 | 0.00 | 0.00 |
| 6.90_461.2902  | 0.00 | 0.00 | 0.90 | 1.00 | 0.29 | 0.00 |
| 10.02_459.0960 | 0.00 | 0.00 | 0.58 | 1.00 | 0.07 | 0.09 |
| 9.03_457.1145  | 0.00 | 0.00 | 0.60 | 1.00 | 0.03 | 0.04 |
| 8.67_457.1133  | 0.00 | 0.00 | 0.66 | 1.00 | 0.00 | 0.00 |
| 3.92_456.2075  | 0.00 | 0.32 | 0.61 | 1.00 | 0.00 | 0.00 |
| 9.81_454.0847  | 0.00 | 0.00 | 0.78 | 1.00 | 0.00 | 0.03 |
| 9.05_454.0819  | 0.00 | 0.00 | 0.57 | 1.00 | 0.00 | 0.00 |
| 6.42_472.2832  | 0.00 | 0.00 | 0.75 | 1.00 | 0.00 | 0.02 |
| 6.46_471.2466  | 0.00 | 0.01 | 0.64 | 1.00 | 0.19 | 0.21 |
| 10.02_470.0758 | 0.00 | 0.00 | 0.62 | 1.00 | 0.00 | 0.00 |
| 9.02_468.1011  | 0.00 | 0.00 | 0.58 | 1.00 | 0.00 | 0.00 |
| 9.08_467.0388  | 0.00 | 0.00 | 0.79 | 1.00 | 0.00 | 0.00 |
| 8.31_465.0807  | 0.00 | 0.00 | 0.70 | 1.00 | 0.00 | 0.00 |
| 8.82_465.0807  | 0.00 | 0.00 | 0.67 | 1.00 | 0.00 | 0.00 |
| 9.79_462.0710  | 0.00 | 0.00 | 0.72 | 1.00 | 0.03 | 0.03 |
| 9.04_462.0699  | 0.00 | 0.00 | 0.61 | 1.00 | 0.00 | 0.00 |
| 7.03_483.0939  | 0.00 | 0.00 | 0.72 | 1.00 | 0.00 | 0.00 |
| 9.78_481.0499  | 0.00 | 0.00 | 1.00 | 0.75 | 0.07 | 0.08 |
| 9.02_479.0963  | 0.00 | 0.00 | 0.62 | 1.00 | 0.04 | 0.04 |
| 10.01_478.0692 | 0.00 | 0.00 | 0.53 | 1.00 | 0.00 | 0.00 |
| 4.15_476.2404  | 0.00 | 0.00 | 0.56 | 1.00 | 0.00 | 0.03 |
| 9.02_476.0877  | 0.00 | 0.00 | 0.55 | 1.00 | 0.00 | 0.00 |
| 7.06_475.1057  | 0.00 | 0.00 | 0.61 | 1.00 | 0.00 | 0.01 |
| 9.02_495.0687  | 0.00 | 0.00 | 0.70 | 1.00 | 0.00 | 0.03 |
| 5.37_493.1709  | 0.00 | 0.00 | 1.00 | 0.69 | 0.00 | 0.14 |
| 9.79_513.1525  | 0.00 | 0.00 | 0.48 | 1.00 | 0.00 | 0.00 |
| 1.76_515.1445  | 0.00 | 0.00 | 0.74 | 1.00 | 0.00 | 0.00 |
| 10.06_526.3139 | 0.00 | 0.00 | 1.00 | 0.54 | 0.02 | 0.00 |
| 7.20_544.2918  | 0.00 | 0.00 | 0.61 | 1.00 | 0.20 | 0.16 |
| 9.00_540.1495  | 0.00 | 0.00 | 0.63 | 1.00 | 0.00 | 0.00 |
| 6.63_570.3104  | 0.00 | 0.00 | 0.91 | 1.00 | 0.00 | 0.00 |
| 9.08_562.5875  | 0.00 | 0.00 | 0.62 | 1.00 | 0.00 | 0.00 |
| 7.14_560.1805  | 0.00 | 0.00 | 0.64 | 1.00 | 0.13 | 0.00 |
| 9.02_590.6205  | 0.00 | 0.00 | 0.63 | 1.00 | 0.00 | 0.00 |
| 9.79_576.6021  | 0.00 | 0.00 | 1.00 | 0.60 | 0.03 | 0.00 |
| 9.06_576.6005  | 0.00 | 0.00 | 0.60 | 1.00 | 0.00 | 0.00 |
| 9.07_662.0928  | 0.00 | 0.00 | 0.48 | 1.00 | 0.00 | 0.00 |
| 9.02_704.1451  | 0.00 | 0.00 | 0.54 | 1.00 | 0.00 | 0.00 |
| 9.03_696.1548  | 0.00 | 0.00 | 0.49 | 1.00 | 0.00 | 0.00 |
| 9.71_694.1152  | 0.00 | 0.00 | 0.66 | 1.00 | 0.00 | 0.00 |
| 9.03_690.1259  | 0.00 | 0.00 | 0.54 | 1.00 | 0.00 | 0.00 |

### D. Mass Spectral Data for Selected Features

|                |      |      |      |      |      |      |
|----------------|------|------|------|------|------|------|
| 9.79_683.1204  | 0.00 | 0.00 | 1.00 | 0.68 | 0.00 | 0.00 |
| 9.06_676.1101  | 0.00 | 0.00 | 0.53 | 1.00 | 0.00 | 0.00 |
| 9.41_675.1324  | 0.00 | 0.00 | 0.54 | 1.00 | 0.00 | 0.00 |
| 9.78_885.1896  | 0.00 | 0.00 | 0.47 | 1.00 | 0.00 | 0.00 |
| 9.07_879.1306  | 0.00 | 0.00 | 0.69 | 1.00 | 0.00 | 0.00 |
| 9.02_935.1961  | 0.00 | 0.00 | 0.53 | 1.00 | 0.00 | 0.00 |
| 7.21_916.0943  | 0.00 | 0.00 | 1.00 | 0.78 | 0.13 | 0.00 |
| 9.80_907.1678  | 0.00 | 0.00 | 0.82 | 1.00 | 0.01 | 0.01 |
| 9.04_907.1662  | 0.00 | 0.00 | 0.51 | 1.00 | 0.02 | 0.00 |
| 9.41_904.1590  | 0.00 | 0.00 | 0.53 | 1.00 | 0.00 | 0.00 |
| 7.67_1031.2480 | 0.00 | 0.14 | 0.97 | 1.00 | 0.47 | 0.00 |
| 7.69_1031.1674 | 0.00 | 0.10 | 1.00 | 0.91 | 0.13 | 0.22 |
| 7.67_1031.0798 | 0.00 | 0.00 | 0.91 | 1.00 | 0.00 | 0.00 |
| 7.69_1000.1273 | 0.00 | 0.00 | 0.49 | 1.00 | 0.00 | 0.07 |
| 7.63_942.9948  | 0.00 | 0.00 | 1.00 | 0.90 | 0.00 | 0.00 |
| 7.01_1221.4414 | 0.00 | 0.00 | 0.55 | 1.00 | 0.00 | 0.00 |
| 9.41_1125.2062 | 0.00 | 0.00 | 0.48 | 1.00 | 0.00 | 0.00 |
| 9.78_465.0808  | 0.00 | 0.00 | 0.87 | 1.00 | 0.09 | 0.11 |
| 9.79_1349.2480 | 0.00 | 0.00 | 0.51 | 1.00 | 0.00 | 0.00 |
| 6.06_294.2084  | 0.00 | 0.00 | 0.59 | 1.00 | 0.11 | 0.14 |
| 9.81_269.0437  | 0.00 | 0.00 | 0.61 | 1.00 | 0.17 | 0.00 |
| 6.65_282.2073  | 0.01 | 0.04 | 0.76 | 1.00 | 0.00 | 0.14 |
| 8.74_542.3146  | 0.01 | 0.00 | 1.00 | 0.73 | 0.00 | 0.00 |
| 1.64_246.1172  | 0.02 | 0.00 | 0.74 | 1.00 | 0.19 | 0.00 |
| 1.64_174.0879  | 0.02 | 0.01 | 1.00 | 0.56 | 0.12 | 0.01 |
| 6.66_264.1980  | 0.03 | 0.01 | 0.63 | 1.00 | 0.00 | 0.02 |
| 1.70_260.1135  | 0.08 | 0.00 | 0.75 | 1.00 | 0.49 | 0.00 |
| 7.25_371.1508  | 0.09 | 0.00 | 0.67 | 1.00 | 0.26 | 0.25 |
| 10.18_621.4210 | 0.13 | 0.00 | 0.59 | 1.00 | 0.00 | 0.00 |
| 3.80_288.1929  | 0.15 | 0.13 | 1.00 | 0.77 | 0.13 | 0.00 |
| 3.86_338.1113  | 0.19 | 0.00 | 0.65 | 1.00 | 0.00 | 0.18 |
| 7.91_389.2523  | 0.23 | 0.10 | 0.63 | 1.00 | 0.34 | 0.00 |
| 4.39_362.1069  | 0.62 | 0.54 | 0.00 | 0.05 | 0.64 | 1.00 |
| 12.61_771.4862 | 0.68 | 0.85 | 0.40 | 0.33 | 0.86 | 1.00 |
| 12.67_727.4605 | 0.69 | 0.94 | 0.21 | 0.30 | 0.86 | 1.00 |
| 12.79_595.3829 | 0.73 | 1.00 | 0.46 | 0.37 | 0.79 | 0.83 |
| 12.70_683.4373 | 0.77 | 1.00 | 0.48 | 0.36 | 0.89 | 0.90 |
| 12.78_590.4295 | 0.78 | 0.78 | 0.32 | 0.26 | 0.79 | 1.00 |
| 12.73_655.3845 | 0.83 | 1.00 | 0.56 | 0.44 | 0.82 | 1.00 |
| 12.80_567.3292 | 0.85 | 1.00 | 0.55 | 0.36 | 0.75 | 0.92 |
| 14.79_310.3109 | 0.85 | 0.95 | 0.48 | 0.50 | 0.72 | 1.00 |
| 12.83_546.4021 | 0.86 | 1.00 | 0.00 | 0.24 | 0.76 | 0.84 |
| 5.16_237.1592  | 0.87 | 1.00 | 0.21 | 0.29 | 0.66 | 0.73 |
| 15.94_338.3442 | 0.91 | 1.00 | 0.32 | 0.34 | 0.74 | 0.68 |
| 11.33_299.2599 | 1.00 | 0.77 | 0.00 | 0.00 | 0.69 | 0.51 |
| 4.42_351.1212  | 1.00 | 0.79 | 0.09 | 0.14 | 0.79 | 0.66 |
| 15.92_360.3229 | 1.00 | 0.71 | 0.22 | 0.13 | 0.66 | 0.88 |

## D. Mass Spectral Data for Selected Features

**Table S22.** Normalized heat map of features described as unique in figure 2a when comparing wild type *Nocardioopsis sp. FU40*  $\Delta$ ApoS8 and R4 rifampicin resistant mutant to the S5 streptomycin resistant mutant extract using OPLS-DA and extracting features from the generated S-plot with correlation coefficients  $\geq 0.9$ . Features are normalized to maximum intensity for that feature.

| Feature ID (RT_m/z) | WT   | WT   | R4   | R4   | S5   | S5   |
|---------------------|------|------|------|------|------|------|
| 12.03_135.1163      | 0.00 | 0.04 | 0.00 | 0.00 | 0.79 | 1.00 |
| 12.03_123.1165      | 0.00 | 0.00 | 0.00 | 0.00 | 0.84 | 1.00 |
| 12.03_149.1327      | 0.00 | 0.00 | 0.00 | 0.00 | 0.88 | 1.00 |
| 6.56_162.0938       | 0.00 | 0.00 | 0.28 | 0.35 | 0.82 | 1.00 |
| 16.16_174.0876      | 0.00 | 0.00 | 0.00 | 0.00 | 0.60 | 1.00 |
| 6.60_180.1017       | 0.00 | 0.01 | 0.23 | 0.40 | 0.89 | 1.00 |
| 8.84_203.1804       | 0.00 | 0.00 | 0.00 | 0.00 | 0.85 | 1.00 |
| 8.12_203.1781       | 0.00 | 0.00 | 0.00 | 0.00 | 0.96 | 1.00 |
| 6.22_203.0786       | 0.00 | 0.02 | 0.00 | 0.00 | 1.00 | 0.92 |
| 7.49_207.0994       | 0.00 | 0.06 | 0.28 | 0.52 | 0.86 | 1.00 |
| 8.84_221.1903       | 0.00 | 0.00 | 0.00 | 0.00 | 0.98 | 1.00 |
| 10.62_236.1643      | 0.00 | 0.00 | 0.39 | 0.30 | 1.00 | 0.97 |
| 8.54_235.1344       | 0.00 | 0.00 | 0.30 | 0.51 | 0.96 | 1.00 |
| 7.38_246.1513       | 0.00 | 0.00 | 0.00 | 0.00 | 0.62 | 1.00 |
| 3.58_252.0387       | 0.00 | 0.35 | 0.11 | 0.52 | 1.00 | 1.00 |
| 12.02_263.1978      | 0.00 | 0.03 | 0.00 | 0.00 | 0.93 | 1.00 |
| 10.71_261.1779      | 0.00 | 0.01 | 0.00 | 0.00 | 0.90 | 1.00 |
| 6.28_268.0191       | 0.00 | 0.13 | 0.17 | 0.16 | 1.00 | 0.72 |
| 5.27_264.2082       | 0.00 | 0.00 | 0.36 | 0.46 | 0.97 | 1.00 |
| 4.60_268.0196       | 0.00 | 0.00 | 0.44 | 0.18 | 0.83 | 1.00 |
| 7.15_293.2251       | 0.00 | 0.00 | 0.27 | 0.29 | 0.69 | 1.00 |
| 12.02_309.1921      | 0.00 | 0.01 | 0.00 | 0.00 | 0.90 | 1.00 |
| 12.03_325.1706      | 0.00 | 0.00 | 0.00 | 0.00 | 0.84 | 1.00 |
| 10.73_340.1475      | 0.00 | 0.14 | 0.00 | 0.00 | 1.00 | 0.71 |
| 5.99_338.1374       | 0.00 | 0.00 | 0.30 | 0.24 | 1.00 | 0.97 |
| 4.01_351.5992       | 0.00 | 0.00 | 0.00 | 0.00 | 1.00 | 0.57 |
| 7.52_368.2211       | 0.00 | 0.00 | 0.31 | 0.34 | 0.71 | 1.00 |
| 7.83_387.1861       | 0.00 | 0.00 | 0.50 | 0.00 | 1.00 | 1.00 |
| 6.24_384.2171       | 0.00 | 0.00 | 0.07 | 0.11 | 0.71 | 1.00 |
| 7.98_431.2698       | 0.00 | 0.06 | 0.00 | 0.11 | 0.90 | 1.00 |
| 6.99_443.3240       | 0.00 | 0.23 | 0.00 | 0.00 | 0.87 | 1.00 |
| 7.51_499.2782       | 0.00 | 0.02 | 0.07 | 0.49 | 1.00 | 0.97 |
| 4.37_494.2617       | 0.00 | 0.00 | 0.06 | 0.09 | 0.78 | 1.00 |
| 7.57_542.3960       | 0.00 | 0.42 | 0.00 | 0.00 | 0.79 | 1.00 |
| 12.03_549.4012      | 0.00 | 0.00 | 0.00 | 0.00 | 0.87 | 1.00 |
| 5.18_599.2879       | 0.00 | 0.00 | 0.00 | 0.00 | 1.00 | 0.78 |
| 6.02_637.3187       | 0.00 | 0.00 | 0.00 | 0.00 | 0.38 | 1.00 |
| 6.24_515.2753       | 0.01 | 0.00 | 0.15 | 0.18 | 0.77 | 1.00 |
| 8.10_301.1534       | 0.01 | 0.03 | 0.28 | 0.31 | 0.81 | 1.00 |
| 12.02_205.1953      | 0.01 | 0.00 | 0.00 | 0.00 | 0.84 | 1.00 |
| 8.29_401.1993       | 0.02 | 0.00 | 0.20 | 0.36 | 0.93 | 1.00 |
| 10.18_223.2085      | 0.04 | 0.25 | 0.00 | 0.00 | 1.00 | 0.79 |
| 5.97_286.6247       | 0.05 | 0.01 | 0.21 | 0.14 | 0.92 | 1.00 |
| 7.42_280.1237       | 0.06 | 0.16 | 0.21 | 0.37 | 0.95 | 1.00 |
| 3.86_150.0940       | 0.06 | 0.11 | 0.29 | 0.43 | 0.92 | 1.00 |
| 10.52_673.3745      | 0.06 | 0.09 | 0.32 | 0.51 | 0.87 | 1.00 |
| 5.97_278.6345       | 0.06 | 0.02 | 0.21 | 0.20 | 1.00 | 0.96 |
| 6.72_1450.6973      | 0.08 | 0.02 | 0.22 | 0.32 | 1.00 | 0.92 |
| 7.89_192.1015       | 0.10 | 0.17 | 0.31 | 0.42 | 0.80 | 1.00 |
| 7.42_196.0651       | 0.10 | 0.05 | 0.11 | 0.19 | 0.58 | 1.00 |
| 7.06_221.1900       | 0.12 | 0.36 | 0.01 | 0.00 | 1.00 | 0.97 |
| 15.37_230.0721      | 0.12 | 0.40 | 0.20 | 0.45 | 0.82 | 1.00 |
| 9.47_211.0868       | 0.13 | 0.23 | 0.39 | 0.38 | 0.82 | 1.00 |
| 3.82_230.1126       | 0.14 | 0.09 | 0.41 | 0.33 | 0.81 | 1.00 |
| 6.06_203.1781       | 0.15 | 0.26 | 0.00 | 0.13 | 0.83 | 1.00 |
| 7.06_203.1787       | 0.15 | 0.28 | 0.00 | 0.00 | 0.88 | 1.00 |
| 6.73_1161.1593      | 0.16 | 0.04 | 0.12 | 0.07 | 0.85 | 1.00 |
| 5.96_534.2942       | 0.16 | 0.04 | 0.16 | 0.16 | 0.97 | 1.00 |
| 6.71_1160.7578      | 0.17 | 0.00 | 0.31 | 0.00 | 1.00 | 0.86 |
| 6.73_1160.5609      | 0.20 | 0.00 | 0.05 | 0.17 | 1.00 | 1.00 |
| 5.61_343.2002       | 0.23 | 0.05 | 0.22 | 0.32 | 0.84 | 1.00 |
| 4.81_464.2611       | 0.24 | 0.29 | 0.55 | 0.44 | 0.94 | 1.00 |
| 5.81_605.2195       | 0.28 | 0.40 | 0.38 | 0.62 | 0.77 | 1.00 |
| 4.32_308.1712       | 0.29 | 0.11 | 0.32 | 0.50 | 0.73 | 1.00 |

### D. Mass Spectral Data for Selected Features

|                |      |      |      |      |      |      |
|----------------|------|------|------|------|------|------|
| 6.74_1160.9454 | 0.32 | 0.26 | 0.22 | 0.14 | 1.00 | 0.79 |
| 4.63_149.1104  | 0.32 | 0.51 | 0.38 | 0.66 | 0.98 | 1.00 |
| 5.34_191.1575  | 0.32 | 0.46 | 0.31 | 0.56 | 0.91 | 1.00 |
| 1.49_365.1079  | 0.35 | 0.48 | 0.31 | 0.35 | 0.78 | 1.00 |
| 6.40_263.1761  | 0.36 | 0.38 | 0.37 | 0.56 | 0.81 | 1.00 |
| 13.98_292.2624 | 0.36 | 0.49 | 0.29 | 0.40 | 0.66 | 1.00 |
| 4.53_236.1764  | 0.37 | 0.48 | 0.36 | 0.57 | 0.94 | 1.00 |
| 5.78_164.0706  | 0.39 | 0.52 | 0.39 | 0.60 | 1.00 | 0.96 |
| 8.22_220.1332  | 0.39 | 0.57 | 0.44 | 0.73 | 0.94 | 1.00 |
| 3.75_267.1417  | 0.40 | 0.50 | 0.35 | 0.62 | 0.78 | 1.00 |
| 9.69_220.1127  | 0.41 | 0.48 | 0.29 | 0.00 | 1.00 | 0.98 |
| 5.71_249.1598  | 0.41 | 0.57 | 0.38 | 0.61 | 0.84 | 1.00 |
| 4.67_270.1917  | 0.43 | 0.59 | 0.44 | 0.57 | 0.81 | 1.00 |
| 4.70_221.1315  | 0.45 | 0.67 | 0.43 | 0.63 | 0.96 | 1.00 |
| 6.23_251.1781  | 0.49 | 0.54 | 0.37 | 0.61 | 0.87 | 1.00 |
| 1.50_401.0693  | 0.54 | 0.50 | 0.60 | 0.33 | 1.00 | 0.98 |
| 5.72_240.1231  | 0.56 | 0.39 | 0.47 | 0.51 | 0.89 | 1.00 |
| 6.59_273.1670  | 0.60 | 0.51 | 0.53 | 0.67 | 0.84 | 1.00 |
| 5.43_241.1546  | 0.61 | 0.63 | 0.59 | 0.79 | 0.93 | 1.00 |
| 7.00_916.3325  | 1.00 | 0.59 | 0.55 | 0.66 | 0.00 | 0.00 |

## D. Mass Spectral Data for Selected Features

**Table S23.** Normalized heat map of features described as unique in figure 2a when comparing wild type *Nocardiosis sp. FU40*  $\Delta$ ApoS8 to the R4 rifampicin resistant and S5 streptomycin resistant mutant extracts using OPLS-DA and extracting features from the generated S-plot with correlation coefficients  $\geq 0.9$ . Features are normalized to maximum intensity for that feature.

| Feature ID (RT_m/z) | WT   | WT   | R4   | R4   | S5   | S5   |
|---------------------|------|------|------|------|------|------|
| 1.50_103.5345       | 0.00 | 0.00 | 0.50 | 1.00 | 0.83 | 0.90 |
| 4.14_186.1168       | 0.00 | 0.00 | 0.76 | 0.81 | 0.81 | 1.00 |
| 4.84_205.1323       | 0.00 | 0.00 | 0.74 | 0.86 | 1.00 | 0.89 |
| 1.32_211.8786       | 0.00 | 0.00 | 0.42 | 0.94 | 1.00 | 0.92 |
| 1.49_211.0584       | 0.00 | 0.19 | 0.65 | 1.00 | 0.77 | 0.68 |
| 5.11_236.1306       | 0.00 | 0.11 | 0.59 | 0.61 | 0.88 | 1.00 |
| 8.08_252.0397       | 0.00 | 0.00 | 0.72 | 0.60 | 1.00 | 0.97 |
| 1.78_262.1278       | 0.00 | 0.00 | 0.61 | 0.81 | 0.74 | 1.00 |
| 9.60_297.1694       | 0.00 | 0.01 | 0.61 | 1.00 | 0.71 | 0.71 |
| 5.82_322.1007       | 0.00 | 0.00 | 0.87 | 0.97 | 1.00 | 0.99 |
| 9.13_319.1539       | 0.00 | 0.00 | 0.60 | 1.00 | 0.63 | 0.70 |
| 7.48_345.1875       | 0.00 | 0.00 | 0.77 | 0.91 | 1.00 | 0.72 |
| 8.53_359.2035       | 0.00 | 0.11 | 0.90 | 1.00 | 0.78 | 0.62 |
| 1.49_394.1142       | 0.00 | 0.00 | 0.61 | 1.00 | 0.63 | 0.92 |
| 4.02_423.1940       | 0.00 | 0.00 | 0.53 | 0.86 | 0.75 | 1.00 |
| 1.48_431.0890       | 0.00 | 0.30 | 0.72 | 0.73 | 0.88 | 1.00 |
| 5.52_601.2501       | 0.00 | 0.00 | 0.53 | 0.73 | 0.86 | 1.00 |
| 1.25_639.8836       | 0.00 | 0.00 | 0.48 | 0.77 | 1.00 | 0.77 |
| 5.66_384.2168       | 0.01 | 0.00 | 0.45 | 0.64 | 0.81 | 1.00 |
| 16.15_710.1773      | 0.03 | 0.01 | 0.60 | 0.86 | 1.00 | 0.97 |
| 9.66_279.1583       | 0.03 | 0.00 | 0.46 | 0.71 | 0.73 | 1.00 |
| 5.43_377.1482       | 0.03 | 0.00 | 0.68 | 1.00 | 0.50 | 0.58 |
| 1.73_338.0231       | 0.04 | 0.00 | 0.50 | 0.59 | 0.82 | 1.00 |
| 9.14_239.1284       | 0.04 | 0.04 | 0.59 | 1.00 | 0.80 | 0.56 |
| 1.74_150.0789       | 0.04 | 0.00 | 0.47 | 0.80 | 1.00 | 0.99 |
| 3.07_230.1126       | 0.05 | 0.11 | 0.65 | 0.79 | 0.79 | 1.00 |
| 8.53_283.1523       | 0.05 | 0.10 | 0.73 | 0.86 | 0.92 | 1.00 |
| 8.53_177.0880       | 0.06 | 0.06 | 0.53 | 0.63 | 0.72 | 1.00 |
| 4.75_136.0625       | 0.06 | 0.00 | 0.78 | 1.00 | 0.56 | 0.85 |
| 8.53_207.1002       | 0.06 | 0.07 | 0.56 | 0.69 | 0.84 | 1.00 |
| 3.83_198.1623       | 0.13 | 0.09 | 0.54 | 0.95 | 0.86 | 1.00 |
| 1.73_288.1454       | 0.16 | 0.00 | 0.62 | 0.73 | 1.00 | 0.56 |
| 1.60_229.1318       | 0.21 | 0.04 | 0.54 | 0.70 | 0.91 | 1.00 |
| 9.11_505.3321       | 0.27 | 0.00 | 0.59 | 0.84 | 0.93 | 1.00 |
| 16.18_335.9929      | 0.28 | 0.00 | 0.67 | 0.98 | 0.95 | 1.00 |
| 4.00_320.1711       | 0.33 | 0.04 | 0.76 | 0.77 | 0.80 | 1.00 |
| 12.11_316.2860      | 0.41 | 1.00 | 0.00 | 0.01 | 0.00 | 0.00 |
| 11.78_354.1615      | 0.44 | 1.00 | 0.00 | 0.00 | 0.00 | 0.00 |
| 11.49_251.2052      | 0.45 | 1.00 | 0.00 | 0.00 | 0.00 | 0.00 |
| 11.27_448.3444      | 0.48 | 1.00 | 0.09 | 0.00 | 0.00 | 0.00 |
| 12.43_386.2820      | 0.50 | 1.00 | 0.15 | 0.00 | 0.18 | 0.00 |
| 10.60_346.3091      | 0.51 | 1.00 | 0.00 | 0.00 | 0.00 | 0.00 |
| 10.40_371.3275      | 0.52 | 1.00 | 0.00 | 0.00 | 0.02 | 0.02 |
| 10.70_288.2557      | 0.52 | 1.00 | 0.00 | 0.00 | 0.00 | 0.20 |
| 9.48_225.1993       | 0.53 | 1.00 | 0.01 | 0.02 | 0.02 | 0.02 |
| 4.26_669.2631       | 0.56 | 1.00 | 0.00 | 0.00 | 0.00 | 0.08 |
| 11.80_235.1712      | 0.56 | 1.00 | 0.00 | 0.04 | 0.00 | 0.09 |
| 10.15_739.4618      | 0.56 | 1.00 | 0.06 | 0.05 | 0.11 | 0.07 |
| 14.41_309.2409      | 0.56 | 1.00 | 0.14 | 0.13 | 0.32 | 0.23 |
| 10.53_531.4000      | 0.57 | 1.00 | 0.00 | 0.00 | 0.00 | 0.00 |
| 12.97_407.3144      | 0.58 | 1.00 | 0.20 | 0.09 | 0.30 | 0.12 |
| 12.98_399.3242      | 0.58 | 1.00 | 0.19 | 0.09 | 0.31 | 0.12 |
| 4.37_663.2850       | 0.59 | 1.00 | 0.01 | 0.00 | 0.00 | 0.00 |
| 13.98_433.3418      | 0.61 | 1.00 | 0.02 | 0.01 | 0.05 | 0.00 |
| 4.64_412.2067       | 0.62 | 1.00 | 0.08 | 0.10 | 0.15 | 0.20 |
| 6.19_181.1351       | 0.63 | 1.00 | 0.09 | 0.11 | 0.08 | 0.10 |
| 10.97_401.2525      | 0.63 | 1.00 | 0.00 | 0.00 | 0.08 | 0.21 |
| 11.58_415.2745      | 0.65 | 1.00 | 0.00 | 0.00 | 0.07 | 0.02 |
| 12.62_273.1378      | 0.66 | 1.00 | 0.00 | 0.00 | 0.00 | 0.00 |
| 4.27_647.2871       | 0.67 | 1.00 | 0.00 | 0.01 | 0.09 | 0.00 |
| 11.44_223.2060      | 0.67 | 1.00 | 0.00 | 0.00 | 0.00 | 0.00 |
| 8.08_219.1411       | 0.68 | 1.00 | 0.00 | 0.00 | 0.30 | 0.24 |
| 6.85_824.9348       | 0.70 | 1.00 | 0.00 | 0.00 | 0.00 | 0.23 |
| 16.15_442.8736      | 0.71 | 1.00 | 0.00 | 0.00 | 0.00 | 0.00 |

### D. Mass Spectral Data for Selected Features

|                |      |      |      |      |      |      |
|----------------|------|------|------|------|------|------|
| 7.07_184.1710  | 0.72 | 1.00 | 0.00 | 0.00 | 0.00 | 0.00 |
| 4.37_150.0945  | 0.72 | 1.00 | 0.00 | 0.00 | 0.00 | 0.00 |
| 11.18_473.3585 | 0.75 | 1.00 | 0.04 | 0.01 | 0.08 | 0.04 |
| 12.74_443.3505 | 0.77 | 1.00 | 0.00 | 0.00 | 0.01 | 0.00 |
| 11.97_299.2600 | 0.80 | 1.00 | 0.00 | 0.00 | 0.31 | 0.21 |
| 11.84_443.3878 | 0.82 | 1.00 | 0.09 | 0.05 | 0.11 | 0.06 |
| 11.03_354.1608 | 0.82 | 1.00 | 0.00 | 0.04 | 0.09 | 0.25 |
| 11.28_440.3462 | 0.82 | 1.00 | 0.00 | 0.00 | 0.00 | 0.00 |
| 12.98_282.2118 | 0.82 | 1.00 | 0.14 | 0.03 | 0.15 | 0.10 |
| 10.38_401.3397 | 0.88 | 1.00 | 0.50 | 0.32 | 0.27 | 0.16 |
| 9.26_219.1735  | 0.88 | 1.00 | 0.00 | 0.00 | 0.00 | 0.00 |
| 4.50_359.1197  | 0.89 | 1.00 | 0.00 | 0.00 | 0.00 | 0.00 |
| 13.49_295.2258 | 0.91 | 1.00 | 0.08 | 0.03 | 0.06 | 0.00 |
| 4.49_225.1597  | 0.97 | 1.00 | 0.49 | 0.50 | 0.54 | 0.56 |
| 12.89_441.3208 | 0.99 | 1.00 | 0.40 | 0.25 | 0.49 | 0.58 |
| 11.31_225.6512 | 1.00 | 0.95 | 0.26 | 0.18 | 0.00 | 0.00 |
| 9.27_240.2315  | 1.00 | 0.88 | 0.00 | 0.11 | 0.00 | 0.00 |
| 10.39_268.2627 | 1.00 | 0.83 | 0.00 | 0.00 | 0.00 | 0.00 |
| 11.44_291.1951 | 1.00 | 0.75 | 0.00 | 0.00 | 0.00 | 0.00 |
| 12.62_313.2746 | 1.00 | 0.83 | 0.00 | 0.00 | 0.12 | 0.11 |
| 14.31_325.2414 | 1.00 | 0.74 | 0.00 | 0.00 | 0.00 | 0.00 |
| 15.49_338.3442 | 1.00 | 0.86 | 0.00 | 0.03 | 0.00 | 0.00 |
| 13.48_397.3392 | 1.00 | 0.75 | 0.00 | 0.01 | 0.00 | 0.00 |
| 13.95_411.3586 | 1.00 | 0.78 | 0.00 | 0.00 | 0.06 | 0.00 |
| 13.27_419.3131 | 1.00 | 0.81 | 0.00 | 0.00 | 0.00 | 0.00 |
| 12.75_617.4294 | 1.00 | 0.84 | 0.00 | 0.25 | 0.36 | 0.00 |
| 13.92_641.5490 | 1.00 | 0.85 | 0.00 | 0.00 | 0.00 | 0.00 |
| 4.37_685.2548  | 1.00 | 0.86 | 0.00 | 0.00 | 0.12 | 0.23 |
